# Supplementary material for: Multi-omics reveals changed energy metabolism of liver and muscle by caffeine after mice swimming
Source: PeerJ journal article supplement (doi:10.7717/peerj.16677), 2024-01-03
Supplement: Graphical_Abstract.pdf [file Graphical_Abstract.pdf]

## METHODS

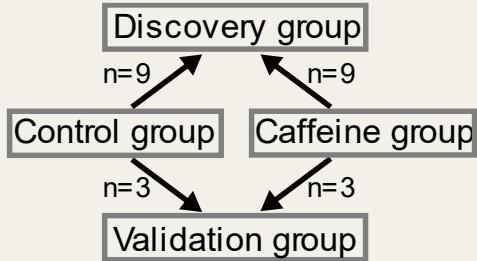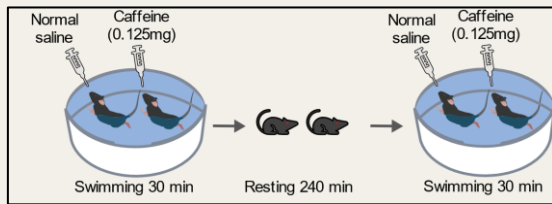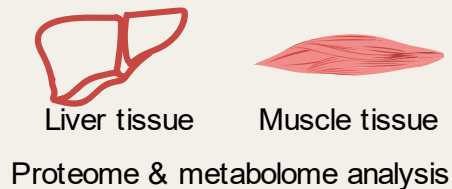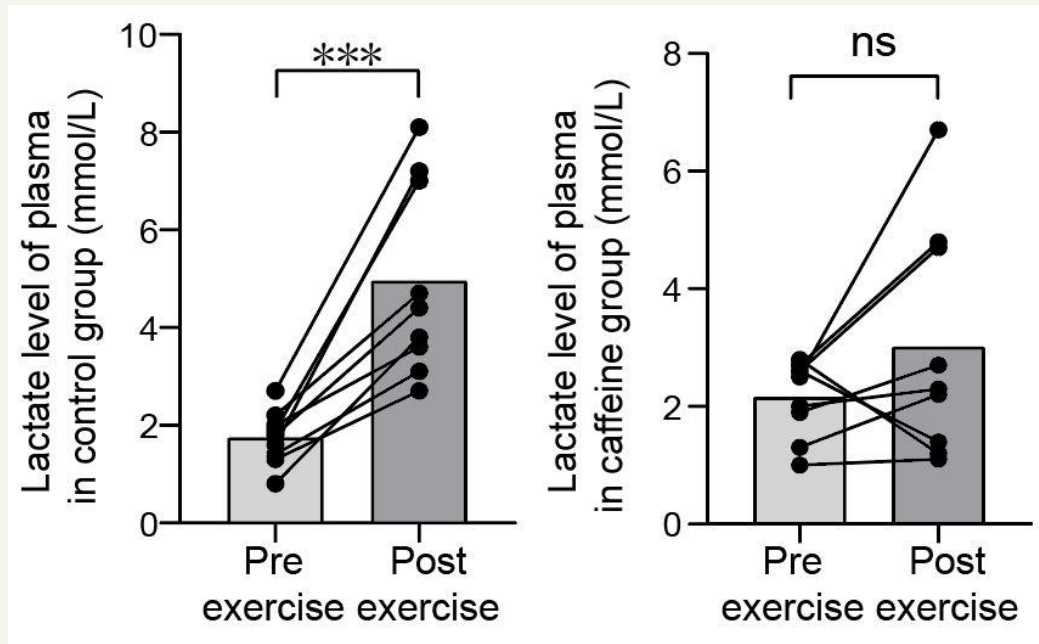

**Conclusion: Caffeine significantly upregulates the expression of exercise-related proteins, and accelerates the utilization of lactate during exercise.**
