# Supplementary material for: Multi-omics reveals changed energy metabolism of liver and muscle by caffeine after mice swimming
Source: PeerJ. 2024 Jan 3;12:e16677. doi: 10.7717/peerj.16677 (PMC10771084; doi:10.7717/peerj.16677)
Supplement: Supplemental Information 1 [file peerj-12-16677-s001.xlsx]

## Sheet: protein_L_filter
Protein name	Protein.description	FL/CL.Ratio	p value	q value	logFC	Change
Akr1c18	Aldo-keto reductase family 1 member C18 OS=Mus musculus OX=10090 GN=Akr1c18 PE=1 SV=2	0.527	2.35e-06	0.00366441	-0.924125	down
Mrpl40	39S ribosomal protein L40, mitochondrial OS=Mus musculus OX=10090 GN=Mrpl40 PE=1 SV=2	2.1265	1.49e-06	0.00366441	1.08848	up
Rer1	Protein RER1 OS=Mus musculus OX=10090 GN=Rer1 PE=1 SV=1	3.8268	1.17e-05	0.0091557	1.93614	up
Tgfbi	Transforming growth factor-beta-induced protein ig-h3 OS=Mus musculus OX=10090 GN=Tgfbi PE=1 SV=1	1.4484	3.37e-05	0.0142067	0.53446	up
Dgat2	Diacylglycerol O-acyltransferase 2 OS=Mus musculus OX=10090 GN=Dgat2 PE=1 SV=1	0.5318	4.26e-05	0.0151355	-0.911044	down
Kpna2	Importin subunit alpha-1 OS=Mus musculus OX=10090 GN=Kpna2 PE=1 SV=2	0.5462	6.46e-05	0.0165335	-0.872499	down
Igfbp1	Insulin-like growth factor-binding protein 1 OS=Mus musculus OX=10090 GN=Igfbp1 PE=2 SV=2	1.8523	7.35e-05	0.0168998	0.889318	up
Ilvbl	2-hydroxyacyl-CoA lyase 2 OS=Mus musculus OX=10090 GN=Ilvbl PE=1 SV=1	0.6021	9.35e-05	0.0174998	-0.731925	down
Rbp4	Retinol-binding protein 4 OS=Mus musculus OX=10090 GN=Rbp4 PE=1 SV=2	0.6929	9.61e-05	0.0175623	-0.529281	down
Tf	Serotransferrin OS=Mus musculus OX=10090 GN=Tf PE=1 SV=1	0.6419	0.000111556	0.0178787	-0.63958	down
Ilf3	Interleukin enhancer-binding factor 3 OS=Mus musculus OX=10090 GN=Ilf3 PE=1 SV=2	1.4351	0.000114917	0.0179374	0.521151	up
S100a9	Protein S100-A9 OS=Mus musculus OX=10090 GN=S100a9 PE=1 SV=3	2.7102	0.000135803	0.0193525	1.4384	up
Ints10	Integrator complex subunit 10 OS=Mus musculus OX=10090 GN=Ints10 PE=1 SV=3	0.4918	0.000207603	0.0227711	-1.02386	down
Gyg1	Glycogenin-1 OS=Mus musculus OX=10090 GN=Gyg1 PE=1 SV=3	1.4653	0.000237191	0.0237614	0.551196	up
H1-4	Histone H1.4 OS=Mus musculus OX=10090 GN=H1-4 PE=1 SV=2	1.7017	0.000276117	0.0248296	0.766977	up
Clec2d	C-type lectin domain family 2 member D OS=Mus musculus OX=10090 GN=Clec2d PE=1 SV=1	0.3802	0.000338172	0.0270693	-1.39517	down
Eipr1	EARP and GARP complex-interacting protein 1 OS=Mus musculus OX=10090 GN=Eipr1 PE=1 SV=2	1.5022	0.000638497	0.0384641	0.587077	up
Insig2	Insulin-induced gene 2 protein OS=Mus musculus OX=10090 GN=Insig2 PE=1 SV=1	0.5854	0.000747567	0.0413217	-0.772505	down
Srrm1	Serine/arginine repetitive matrix protein 1 OS=Mus musculus OX=10090 GN=Srrm1 PE=1 SV=2	0.6711	0.000768086	0.0418075	-0.5754	down
Gabpa	GA-binding protein alpha chain OS=Mus musculus OX=10090 GN=Gabpa PE=1 SV=2	1.96	0.000842244	0.0434458	0.970854	up
S100a8	Protein S100-A8 OS=Mus musculus OX=10090 GN=S100a8 PE=1 SV=3	1.5463	0.000905411	0.0448652	0.62882	up
Mtmr1	Myotubularin-related protein 1 OS=Mus musculus OX=10090 GN=Mtmr1 PE=1 SV=1	1.5371	0.00104509	0.0478511	0.620211	up
Sdc4	Syndecan-4 OS=Mus musculus OX=10090 GN=Sdc4 PE=1 SV=1	1.5564	0.00108393	0.0486023	0.638213	up
