# Supplementary material for: Multi-omics reveals changed energy metabolism of liver and muscle by caffeine after mice swimming
Source: PeerJ. 2024 Jan 3;12:e16677. doi: 10.7717/peerj.16677 (PMC10771084; doi:10.7717/peerj.16677)
Supplement: Supplemental Information 2 [file peerj-12-16677-s002.xlsx]

## Sheet: protein_M_filter
Protein name	Protein.description		FM/CM.Ratio	p value	q value	logFC	Change
Lman2	Vesicular integral-membrane protein VIP36 OS=Mus musculus OX=10090 GN=Lman2 PE=1 SV=2		1.4323	5.79236e-05	0.02988	0.518334	up
Psmd12	26S proteasome non-ATPase regulatory subunit 12 OS=Mus musculus OX=10090 GN=Psmd12 PE=1 SV=4		1.8507	0.000181043	0.0445602	0.888071	up
Ctnnd1	Catenin delta-1 OS=Mus musculus OX=10090 GN=Ctnnd1 PE=1 SV=2		0.4172	0.00025866	0.0478812	-1.26119	down
