# Supplementary material for: Multi-omics reveals changed energy metabolism of liver and muscle by caffeine after mice swimming
Source: PeerJ. 2024 Jan 3;12:e16677. doi: 10.7717/peerj.16677 (PMC10771084; doi:10.7717/peerj.16677)
Supplement: Supplemental Information 3 [file peerj-12-16677-s003.xlsx]

## Sheet: metabolites_L_filter
Compounds	VIP	Fold_Change	Log2FC	Change	p value
L-Asparagine	1.69549	2.46233	1.30002	up	0.000121826
L-Serine	1.73865	1.68613	0.753715	up	2.35726e-06
L-Threonine	1.77411	1.51076	0.595278	up	1.52416e-06
L-Lactate	1.57414	0.597841	-0.742167	down	1.07354e-05
Glucose	1.41346	0.621519	-0.68613	down	3.21317e-05
Oxaloacetate	0.91411	0.598028	-0.741715	down	0.0358178
Alpha-Ketoglutaric Acid	1.06774	0.513536	-0.961461	down	0.0458903
L-Tyrosine	1.34978	1.68341	0.75139	up	0.00992699
D-Glucose 6-phosphate	1.58331	0.305605	-1.71026	down	0.0003202
D-Fructose 6-phosphate	1.60079	0.308518	-1.69658	down	0.000288241
D-Glucose 1-phosphate	1.29101	0.538035	-0.894228	down	0.000948641
Pyruvic acid	1.48488	0.550711	-0.860632	down	0.00204709
D-Erythrose 4-phosphate	1.55989	0.423378	-1.23998	down	7.62825e-05
sedoheptulose 7-phosphate	1.45033	0.410488	-1.28459	down	7.51955e-06
dAMP	0.960134	1.45071	0.536762	up	0.0189609
dTMP	1.12806	1.51416	0.598513	up	0.00739775
2-Phospho-D-glyceric acid	1.17105	522424	18.9949	up	0.039824
Trehalose-6-phosphate	1.1803	0.481976	-1.05297	down	0.00108564
Xyluose-5-phosphate	1.13251	0.605005	-0.724981	down	0.00308258
L-citrulline	1.442	1.47425	0.559981	up	0.000506878
Succinyl-CoA	1.02328	0.372131	-1.42612	down	0.000134828
L-cysteine	1.81171	1.66742	0.737616	up	2.90359e-07
ornithine	1.68138	1.57965	0.659609	up	1.47005e-05
