# Supplementary material for: Multi-omics reveals changed energy metabolism of liver and muscle by caffeine after mice swimming
Source: PeerJ. 2024 Jan 3;12:e16677. doi: 10.7717/peerj.16677 (PMC10771084; doi:10.7717/peerj.16677)
Supplement: Supplemental Information 4 [file peerj-12-16677-s004.xlsx]

## Sheet: metabolites_M_filter
Compounds	VIP	Fold_Change	Log2FC	Change	p value
Succinate/Succinic acid	0.922853	0.670085	-0.577583	down	0.0100956
Phenyllactate	1.48652	2.03203	1.02292	up	1.70658e-05
L-Lactate	1.43954	0.579503	-0.787112	down	1.38304e-05
Uracil	1.27555	2.43397	1.28331	up	0.001828
Glucose	1.15998	0.594902	-0.749277	down	0.000992675
Oxaloacetate	1.41713	6.62074	2.72699	up	1.36775e-05
Methylmalonate	1.08591	0.639238	-0.645576	down	0.0046631
D-Glucose 6-phosphate	1.51723	0.0655269	-3.93177	down	3.81041e-05
D-Fructose 6-phosphate	1.51496	0.0633667	-3.98013	down	4.12826e-05
D-Glucose 1-phosphate	1.51383	1.61888e-05	-15.9146	down	1.37514e-06
6-Phosphogluconic acid	1.50357	0.331896	-1.5912	down	2.75223e-05
Pyruvic acid	1.06336	1.94899	0.962726	up	0.00413151
D-Erythrose 4-phosphate	0.888959	0.0663933	-3.91282	down	4.31255e-05
sedoheptulose 7-phosphate	1.50683	0.145915	-2.7768	down	7.76021e-05
D-Ribulose 5-phosphate	1.34749	0.688969	-0.537489	down	0.000169474
dAMP	1.42564	8.27334	3.04847	up	0.000261007
UMP	1.21109	0.407761	-1.29421	down	0.000653833
dTMP	0.965681	1.54141	0.624252	up	0.0120863
dUMP	1.22771	2.17956	1.12404	up	0.00374151
D-Glutamine	1.48114	0.593364	-0.753011	down	2.86316e-06
UDP-GlcNAc	0.892376	0.575673	-0.796679	down	0.0367057
Glyceraldehyde 3-phosphate	1.18655	0.255485	-1.96869	down	0.00012757
Xyluose-5-phosphate	1.05137	0.68534	-0.545108	down	0.00526125
argininosuccinic acid	0.954341	1.46596	0.551845	up	0.0130481
phosphorylethanolamine	1.02654	1.84725	0.885379	up	0.0130673
L-Cystine	1.33439	0.515552	-0.955811	down	0.000417008
Acetyl-CoA	1.19394	0.130874	-2.93375	down	3.14783e-05
