# Supplementary material for: Multi-omics reveals changed energy metabolism of liver and muscle by caffeine after mice swimming
Source: PeerJ. 2024 Jan 3;12:e16677. doi: 10.7717/peerj.16677 (PMC10771084; doi:10.7717/peerj.16677)
Supplement: Supplemental Information 5 [file peerj-12-16677-s005.xlsx]

## Sheet: m_p_cor_0.3
metabolite	protein	q value	r
Uracil	Gyg1	1.52289e-20	-0.960929
Uracil	Ctnnd1	9.54764e-19	-0.949911
L-Asparagine	Lman2	1.48454e-16	-0.932047
Uracil	Eipr1	8.18925e-16	-0.924609
D-Ribulose 5-phosphate	Lman2	2.62486e-15	-0.919056
Glucose	Gyg1	8.07963e-14	-0.900105
6-Phosphogluconic acid	Gyg1	9.96492e-14	-0.898804
Acetyl-CoA	Gyg1	6.05216e-13	-0.886845
argininosuccinic acid	Lman2	1.332e-12	-0.881154
D-Glutamine	Lman2	2.61133e-12	-0.876057
Uracil	Tgfbi	2.9721e-12	-0.87505
L-Asparagine	Ilvbl	2.92244e-11	-0.8745
6-Phosphogluconic acid	Ctnnd1	9.35905e-12	-0.86574
ornithine	Ctnnd1	9.52318e-12	-0.865593
Glucose	Ctnnd1	1.34648e-11	-0.862635
dAMP	Ctnnd1	1.38761e-11	-0.862374
Methylmalonate	Gyg1	1.47391e-11	-0.861851
Succinate/Succinic acid	Gyg1	1.49995e-11	-0.861698
Acetyl-CoA	Ctnnd1	1.57614e-11	-0.861266
Glucose	Eipr1	2.99353e-11	-0.855539
D-Ribulose 5-phosphate	Ilvbl	2.88304e-10	-0.853062
dAMP	Gyg1	4.0695e-11	-0.852708
6-Phosphogluconic acid	Eipr1	4.89348e-11	-0.850979
Succinate/Succinic acid	Ctnnd1	5.34086e-11	-0.850151
Methylmalonate	Ctnnd1	5.62139e-11	-0.849665
L-Lactate	Lman2	7.8586e-11	-0.846436
D-Glutamine	Ilvbl	7.63956e-10	-0.842766
Acetyl-CoA	Eipr1	1.70081e-10	-0.838706
ornithine	Gyg1	1.74316e-10	-0.838453
ornithine	Kpna2	1.84411e-05	-0.832149
Glucose	Tgfbi	3.37929e-10	-0.831475
L-Serine	Kpna2	1.92975e-05	-0.831122
6-Phosphogluconic acid	Tgfbi	4.83691e-10	-0.827558
Methylmalonate	Eipr1	5.24461e-10	-0.82666
Succinate/Succinic acid	Eipr1	5.7687e-10	-0.825597
dAMP	Eipr1	6.32118e-10	-0.824569
L-cysteine	Kpna2	2.6387e-05	-0.823851
D-Glucose 1-phosphate	Gyg1	1.07853e-09	-0.81843
Uracil	Gabpa	0.00216454	-0.816523
Glucose	Gabpa	0.00217851	-0.816243
Acetyl-CoA	Tgfbi	1.49772e-09	-0.814541
ornithine	Eipr1	1.84386e-09	-0.81203
Trehalose-6-phosphate	Gyg1	2.50813e-09	-0.808245
Uracil	Mtmr1	6.77789e-09	-0.795422
Methylmalonate	Tgfbi	7.48052e-09	-0.794098
Succinate/Succinic acid	Tgfbi	8.22342e-09	-0.792818
dUMP	Insig2	2.1086e-05	-0.789251
argininosuccinic acid	Ilvbl	6.68675e-08	-0.784214
phosphorylethanolamine	Eipr1	1.70343e-08	-0.78267
Trehalose-6-phosphate	Ctnnd1	2.76024e-08	-0.775634
Trehalose-6-phosphate	Eipr1	3.40715e-08	-0.772484
Acetyl-CoA	Psmd12	3.46436e-08	-0.772233
D-Glucose 1-phosphate	Ctnnd1	3.82179e-08	-0.770745
phosphorylethanolamine	Ctnnd1	3.83903e-08	-0.770676
D-Glucose 1-phosphate	Eipr1	5.93265e-08	-0.763942
phosphorylethanolamine	Gyg1	6.35691e-08	-0.762853
dAMP	Tgfbi	6.72135e-08	-0.76197
Succinyl-CoA	Gyg1	7.10622e-08	-0.761083
L-Threonine	Kpna2	0.000246911	-0.760712
6-Phosphogluconic acid	Psmd12	9.39625e-08	-0.75658
D-Glucose 1-phosphate	Tgfbi	1.06185e-07	-0.754578
D-Erythrose 4-phosphate	Gabpa	0.00739684	-0.75361
L-Lactate	Ilvbl	5.88662e-07	-0.747154
Trehalose-6-phosphate	Tgfbi	1.75622e-07	-0.746136
Uracil	Psmd12	2.51171e-07	-0.739928
ornithine	Tgfbi	3.3407e-07	-0.734851
D-Glucose 1-phosphate	Gabpa	0.0102147	-0.733401
Succinyl-CoA	Eipr1	3.63003e-07	-0.733351
Glucose	Psmd12	3.7045e-07	-0.732982
L-Asparagine	Kpna2	0.000672618	-0.724479
Glucose	Mtmr1	6.17678e-07	-0.72351
L-citrulline	Ilvbl	2.08108e-06	-0.722276
dAMP	Mtmr1	8.89214e-07	-0.716515
D-Glucose 1-phosphate	Psmd12	9.2837e-07	-0.715674
Succinyl-CoA	Ctnnd1	9.52025e-07	-0.715181
6-Phosphogluconic acid	Mtmr1	1.39122e-06	-0.707631
Succinyl-CoA	Tgfbi	1.63978e-06	-0.704285
Methylmalonate	Mtmr1	1.69051e-06	-0.70366
Succinate/Succinic acid	Mtmr1	1.73969e-06	-0.70307
dUMP	Lman2	1.7896e-06	-0.702487
ornithine	Dgat2	4.4242e-06	-0.698144
Acetyl-CoA	Mtmr1	2.23237e-06	-0.69788
Alpha-Ketoglutaric Acid	Gyg1	2.74438e-06	-0.693499
Methylmalonate	Psmd12	2.76193e-06	-0.693362
Succinate/Succinic acid	Psmd12	2.84607e-06	-0.692719
L-Cystine	Gyg1	2.92839e-06	-0.692106
L-Serine	Dgat2	6.46924e-06	-0.689529
ornithine	Psmd12	4.36248e-06	-0.68338
L-Serine	Ctnnd1	5.04626e-06	-0.680117
Alpha-Ketoglutaric Acid	Ctnnd1	5.28415e-06	-0.679076
Trehalose-6-phosphate	Gabpa	0.0217272	-0.67848
Alpha-Ketoglutaric Acid	Eipr1	5.45382e-06	-0.678359
6-Phosphogluconic acid	Gabpa	0.0219932	-0.677494
ornithine	Gabpa	0.0221003	-0.6771
L-Cystine	Ctnnd1	5.86651e-06	-0.676698
phosphorylethanolamine	Tgfbi	6.74959e-06	-0.673474
dAMP	Tf	7.09666e-06	-0.672312
ornithine	Mtmr1	7.48098e-06	-0.671083
UMP	Ilvbl	2.00919e-05	-0.66987
L-Asparagine	Insig2	0.000942531	-0.667672
Acetyl-CoA	Gabpa	0.024953	-0.667064
Xyluose-5-phosphate	Lman2	8.9444e-06	-0.66688
D-Fructose 6-phosphate	Gabpa	0.0250333	-0.666793
Succinyl-CoA	Gabpa	0.0252523	-0.666059
D-Glucose 6-phosphate	Gabpa	0.0262149	-0.662882
L-Serine	Gyg1	1.08928e-05	-0.662166
dUMP	Ilvbl	3.77646e-05	-0.653178
phosphorylethanolamine	Mtmr1	1.57945e-05	-0.653048
Glyceraldehyde 3-phosphate	Insig2	0.00133657	-0.652805
Trehalose-6-phosphate	Mtmr1	1.66806e-05	-0.651682
Alpha-Ketoglutaric Acid	Tgfbi	1.83631e-05	-0.649262
UMP	Lman2	2.14759e-05	-0.645272
L-Cystine	Eipr1	2.28793e-05	-0.643642
L-Threonine	Dgat2	4.6073e-05	-0.639861
dAMP	Dgat2	4.82624e-05	-0.63857
Trehalose-6-phosphate	Psmd12	2.94491e-05	-0.637049
ornithine	Tf	3.37359e-05	-0.633435
phosphorylethanolamine	Tf	3.68465e-05	-0.631065
Pyruvic acid	Eipr1	3.76282e-05	-0.630498
Glyceraldehyde 3-phosphate	Ilvbl	8.82134e-05	-0.629025
Succinyl-CoA	Sdc4	0.00530129	-0.62756
L-Threonine	Gyg1	4.69419e-05	-0.624454
L-Cystine	Tgfbi	5.01779e-05	-0.622607
dAMP	Psmd12	5.02413e-05	-0.622572
argininosuccinic acid	Insig2	0.00265879	-0.621056
L-Threonine	Ctnnd1	5.69985e-05	-0.619043
Pyruvic acid	Gabpa	0.0422857	-0.619018
L-Serine	Tf	6.06958e-05	-0.61727
Succinyl-CoA	Mtmr1	6.19674e-05	-0.616682
D-Erythrose 4-phosphate	Psmd12	6.63925e-05	-0.61472
dTMP	Rbp4	6.78169e-05	-0.614113
L-citrulline	Lman2	6.97562e-05	-0.613305
D-Glucose 1-phosphate	Mtmr1	7.56672e-05	-0.610962
L-Serine	Eipr1	8.00573e-05	-0.609327
Oxaloacetate	Eipr1	9.65602e-05	-0.603826
L-Tyrosine	Ilvbl	0.000202022	-0.603304
Succinyl-CoA	Psmd12	0.000110641	-0.599766
L-Cystine	Psmd12	0.000128772	-0.595175
Uracil	Tf	0.000136664	-0.593356
UMP	Insig2	0.00547306	-0.583677
L-citrulline	Clec2d	0.00140419	-0.583346
Oxaloacetate	Mtmr1	0.00021352	-0.579354
Pyruvic acid	Gyg1	0.000222002	-0.5781
D-Ribulose 5-phosphate	Insig2	0.00644401	-0.574568
Succinate/Succinic acid	Tf	0.000249753	-0.57428
Methylmalonate	Tf	0.000254462	-0.573669
Uracil	Dgat2	0.000414287	-0.571545
Alpha-Ketoglutaric Acid	Mtmr1	0.00027878	-0.57067
Oxaloacetate	Ctnnd1	0.000310961	-0.567042
Oxaloacetate	Gyg1	0.000356941	-0.562401
L-Threonine	Tf	0.000360242	-0.562089
L-Serine	Tgfbi	0.000370509	-0.561134
Pyruvic acid	Tgfbi	0.000375312	-0.560695
L-Threonine	Psmd12	0.000381592	-0.560129
Pyruvic acid	Ctnnd1	0.000382033	-0.56009
D-Glutamine	Insig2	0.00828609	-0.560023
Oxaloacetate	Tgfbi	0.000395024	-0.558946
Xyluose-5-phosphate	Ilvbl	0.000736657	-0.558188
L-Tyrosine	Kpna2	0.0166386	-0.555735
Alpha-Ketoglutaric Acid	Psmd12	0.000453434	-0.554184
Glucose	Sdc4	0.0175754	-0.551862
ornithine	Akr1c18	0.0080761	-0.549477
L-Asparagine	Srrm1	0.000548838	-0.547469
Glyceraldehyde 3-phosphate	Lman2	0.000560753	-0.546705
D-Erythrose 4-phosphate	Igfbp1	0.00082564	-0.546519
L-Threonine	Eipr1	0.000676194	-0.539967
D-Erythrose 4-phosphate	Sdc4	0.0214131	-0.537523
L-Cystine	Dgat2	0.00107153	-0.536524
L-Serine	Psmd12	0.000820312	-0.532862
L-citrulline	Kpna2	0.0237452	-0.529772
D-Glucose 6-phosphate	Sdc4	0.0240491	-0.528806
L-Lactate	Sdc4	0.024141	-0.528516
L-Threonine	Tgfbi	0.00100592	-0.525189
D-Fructose 6-phosphate	Sdc4	0.0257634	-0.523531
dAMP	Rbp4	0.00114006	-0.520388
sedoheptulose 7-phosphate	Sdc4	0.0273065	-0.519012
Phenyllactate	Ctnnd1	0.00126042	-0.516488
D-Glucose 6-phosphate	Igfbp1	0.00178821	-0.515948
phosphorylethanolamine	Psmd12	0.00131295	-0.514888
D-Fructose 6-phosphate	Igfbp1	0.00187946	-0.513878
L-cysteine	Clec2d	0.00611444	-0.513836
Phenyllactate	Gyg1	0.00138138	-0.512886
L-Serine	Rbp4	0.00145619	-0.510795
L-Cystine	Mtmr1	0.00152631	-0.508919
2-Phospho-D-glyceric acid	Clec2d	0.00701866	-0.506505
D-Glucose 1-phosphate	Akr1c18	0.0167065	-0.504265
6-Phosphogluconic acid	Tf	0.0017773	-0.502773
Phenyllactate	Mtmr1	0.0017784	-0.502748
dTMP	Dgat2	0.00244901	-0.502646
ornithine	Rbp4	0.00187332	-0.500622
Phenyllactate	Eipr1	0.00199528	-0.498025
L-Cystine	Tf	0.00209146	-0.496074
argininosuccinic acid	Srrm1	0.00216233	-0.494685
2-Phospho-D-glyceric acid	Ilvbl	0.00348926	-0.493875
Glyceraldehyde 3-phosphate	Clec2d	0.00894434	-0.493221
D-Ribulose 5-phosphate	Srrm1	0.00242711	-0.489827
L-citrulline	Insig2	0.0248139	-0.487998
phosphorylethanolamine	Dgat2	0.00342514	-0.487847
Pyruvic acid	Mtmr1	0.00273576	-0.484718
UDP-GlcNAc	Psmd12	0.00281538	-0.483482
L-Serine	Mtmr1	0.0029106	-0.482043
L-Tyrosine	Lman2	0.0031185	-0.479038
Phenyllactate	Tf	0.00322045	-0.477628
L-Threonine	Akr1c18	0.0247675	-0.477063
Succinyl-CoA	Igfbp1	0.0047465	-0.472803
Acetyl-CoA	Tf	0.00365361	-0.472039
2-Phospho-D-glyceric acid	Insig2	0.0313334	-0.470556
D-Glutamine	Srrm1	0.00380962	-0.470167
L-Lactate	Insig2	0.0320413	-0.46884
Glucose	Akr1c18	0.0299999	-0.463026
6-Phosphogluconic acid	Akr1c18	0.0300257	-0.462962
Methylmalonate	Dgat2	0.00585422	-0.462766
Phenyllactate	Tgfbi	0.00476753	-0.459942
Uracil	Akr1c18	0.0314244	-0.459545
Succinate/Succinic acid	Dgat2	0.00629147	-0.45925
Acetyl-CoA	Akr1c18	0.0317047	-0.458874
D-Glucose 1-phosphate	Igfbp1	0.00659345	-0.456942
dUMP	Srrm1	0.00538888	-0.454224
L-Tyrosine	Clec2d	0.0178242	-0.452388
dTMP	Ints10	0.00601601	-0.449004
L-Threonine	Rbp4	0.00657928	-0.444699
D-Erythrose 4-phosphate	Akr1c18	0.0391826	-0.44251
L-citrulline	Srrm1	0.00692653	-0.442201
6-Phosphogluconic acid	Dgat2	0.0091407	-0.440416
Trehalose-6-phosphate	Igfbp1	0.00980084	-0.436783
L-Asparagine	Clec2d	0.0240141	-0.43315
D-Glutamine	Clec2d	0.0243505	-0.432226
L-Serine	Akr1c18	0.045209	-0.431023
D-Glucose 6-phosphate	Psmd12	0.00888567	-0.429838
D-Fructose 6-phosphate	Psmd12	0.00942836	-0.426829
D-Erythrose 4-phosphate	H1-4	0.0235338	-0.426736
L-Tyrosine	Srrm1	0.00958648	-0.42598
Acetyl-CoA	Dgat2	0.0122107	-0.425072
Glucose	Tf	0.0100313	-0.423653
dAMP	Akr1c18	0.0497078	-0.423202
Alpha-Ketoglutaric Acid	Tf	0.0106475	-0.420572
Pyruvic acid	Igfbp1	0.0141198	-0.41711
argininosuccinic acid	Clec2d	0.0307575	-0.416345
Glucose	H1-4	0.0298	-0.411007
Succinyl-CoA	H1-4	0.0317831	-0.406591
D-Glucose 1-phosphate	H1-4	0.03258	-0.404879
L-Threonine	Mtmr1	0.0145722	-0.403881
Glucose	Dgat2	0.0179043	-0.403687
6-Phosphogluconic acid	H1-4	0.0334555	-0.403036
L-Cystine	Rbp4	0.016026	-0.398658
dTMP	Tf	0.0163096	-0.397686
sedoheptulose 7-phosphate	S100a8	0.0203196	-0.396317
Acetyl-CoA	H1-4	0.0374894	-0.395016
D-Erythrose 4-phosphate	Gyg1	0.017595	-0.39345
Xyluose-5-phosphate	S100a9	0.0178189	-0.392739
D-Erythrose 4-phosphate	S100a8	0.0230185	-0.388896
Glucose	Igfbp1	0.0231746	-0.388489
dTMP	Gyg1	0.0193432	-0.388087
sedoheptulose 7-phosphate	Psmd12	0.0193622	-0.388031
dTMP	Mtmr1	0.0193958	-0.387932
Pyruvic acid	Psmd12	0.0200514	-0.386029
Trehalose-6-phosphate	Tf	0.021038	-0.383261
Oxaloacetate	Tf	0.0223891	-0.37964
Succinate/Succinic acid	H1-4	0.0478306	-0.377223
Methylmalonate	H1-4	0.0486944	-0.37588
Uracil	H1-4	0.0492712	-0.374994
Uracil	Rbp4	0.0247385	-0.373755
2-Phospho-D-glyceric acid	Srrm1	0.0256288	-0.371645
D-Erythrose 4-phosphate	Tgfbi	0.0266836	-0.369222
L-cysteine	Ints10	0.0268152	-0.368926
L-cysteine	Tf	0.0268179	-0.36892
L-cysteine	Dgat2	0.033594	-0.36538
D-Glucose 6-phosphate	S100a8	0.0341255	-0.364368
D-Fructose 6-phosphate	S100a8	0.0373501	-0.35849
D-Glucose 1-phosphate	Tf	0.0340661	-0.354174
sedoheptulose 7-phosphate	Igfbp1	0.0403026	-0.353459
2-Phospho-D-glyceric acid	Lman2	0.0346012	-0.353191
L-Lactate	Srrm1	0.0391224	-0.345346
UDP-GlcNAc	Tgfbi	0.0394082	-0.344875
D-Glucose 6-phosphate	S100a9	0.0412341	-0.341931
D-Fructose 6-phosphate	S100a9	0.0436541	-0.338188
L-Cystine	S100a9	0.0455335	0.335395
dTMP	S100a9	0.0392536	0.345129
L-Threonine	Ilf3	0.0375746	0.347945
D-Erythrose 4-phosphate	Lman2	0.0368947	0.349114
L-cysteine	Ilf3	0.0368138	0.349254
2-Phospho-D-glyceric acid	Psmd12	0.0360208	0.350642
2-Phospho-D-glyceric acid	S100a9	0.0354759	0.351611
dTMP	Lman2	0.0337159	0.354825
L-Serine	Igfbp1	0.0385244	0.356452
2-Phospho-D-glyceric acid	Ctnnd1	0.0326454	0.356847
L-Tyrosine	S100a8	0.0352645	0.362242
dAMP	Srrm1	0.028783	0.364627
phosphorylethanolamine	Srrm1	0.0279223	0.366476
L-citrulline	Psmd12	0.0271263	0.368229
dTMP	Igfbp1	0.0320621	0.368371
L-Cystine	Srrm1	0.0252149	0.372618
UDP-GlcNAc	Rer1	0.0485522	0.3761
L-Serine	Ilf3	0.0236544	0.37641
dUMP	Igfbp1	0.0278328	0.377282
D-Glutamine	H1-4	0.0462202	0.379779
L-Serine	Ilvbl	0.0267888	0.385342
2-Phospho-D-glyceric acid	Eipr1	0.0196228	0.387267
2-Phospho-D-glyceric acid	Tgfbi	0.019538	0.387515
D-Ribulose 5-phosphate	Rbp4	0.0178882	0.392521
L-Lactate	Rbp4	0.0176547	0.39326
Uracil	Clec2d	0.042363	0.393365
D-Glutamine	Rbp4	0.0168773	0.395782
phosphorylethanolamine	Rer1	0.037072	0.395813
ornithine	Rer1	0.0358869	0.398115
2-Phospho-D-glyceric acid	Gyg1	0.0148629	0.402802
L-citrulline	H1-4	0.0333572	0.403241
D-Erythrose 4-phosphate	Ilvbl	0.017842	0.409871
L-Tyrosine	S100a9	0.0126744	0.411403
L-Lactate	Psmd12	0.0119965	0.414322
L-Tyrosine	Mtmr1	0.0114682	0.416695
UMP	Tf	0.0103262	0.422159
dUMP	Mtmr1	0.0102646	0.422468
Phenyllactate	Ilvbl	0.0118955	0.432728
L-Asparagine	Rbp4	0.00776717	0.436571
Glyceraldehyde 3-phosphate	Dgat2	0.00903023	0.441046
Alpha-Ketoglutaric Acid	Srrm1	0.00696193	0.441953
L-citrulline	Tf	0.00651507	0.445174
ornithine	S100a9	0.00596314	0.449425
L-Serine	Rer1	0.0160206	0.45095
D-Erythrose 4-phosphate	Insig2	0.0388963	0.453598
Methylmalonate	Srrm1	0.00468809	0.460719
Succinate/Succinic acid	Srrm1	0.00439269	0.46371
L-Tyrosine	Psmd12	0.00426081	0.465103
L-Tyrosine	Tgfbi	0.00411163	0.466723
Succinate/Succinic acid	Kpna2	0.0495239	0.469138
argininosuccinic acid	Dgat2	0.00508593	0.46953
Xyluose-5-phosphate	Tf	0.0038611	0.469563
D-Ribulose 5-phosphate	Kpna2	0.0490129	0.470068
ornithine	Sdc4	0.04855	0.470917
L-Tyrosine	Gyg1	0.00345491	0.474527
D-Erythrose 4-phosphate	Srrm1	0.00294758	0.481495
UMP	Tgfbi	0.00280695	0.483611
Methylmalonate	Clec2d	0.0102698	0.485414
dUMP	H1-4	0.00857515	0.487047
Phenyllactate	Lman2	0.00256971	0.4874
Succinate/Succinic acid	Clec2d	0.0096002	0.489245
Pyruvic acid	Srrm1	0.0023097	0.491921
2-Phospho-D-glyceric acid	Igfbp1	0.00308293	0.492562
L-cysteine	Igfbp1	0.00294215	0.494634
Glyceraldehyde 3-phosphate	Tgfbi	0.00173254	0.503811
D-Glutamine	Psmd12	0.00172387	0.504014
argininosuccinic acid	Tf	0.00157503	0.50766
argininosuccinic acid	Rbp4	0.00150323	0.509528
D-Erythrose 4-phosphate	Clec2d	0.0064721	0.510834
Alpha-Ketoglutaric Acid	Clec2d	0.00615892	0.513455
Acetyl-CoA	Clec2d	0.00608657	0.514077
L-Asparagine	Dgat2	0.00183419	0.514894
L-Tyrosine	Eipr1	0.00118627	0.51885
L-Cystine	Ilvbl	0.00191383	0.52022
Glyceraldehyde 3-phosphate	Ctnnd1	0.00107232	0.522746
L-citrulline	Tgfbi	0.00105319	0.523436
L-cysteine	Rer1	0.00398442	0.526687
L-Tyrosine	Ctnnd1	0.000966262	0.526716
6-Phosphogluconic acid	Clec2d	0.00385252	0.537289
Uracil	Sdc4	0.020163	0.541955
L-Threonine	Rer1	0.00281042	0.543295
D-Ribulose 5-phosphate	Psmd12	0.000615988	0.543342
Glyceraldehyde 3-phosphate	Gyg1	0.000580737	0.545456
L-Serine	Sdc4	0.0191229	0.545809
L-Asparagine	Tf	0.000562127	0.546618
D-Glutamine	Dgat2	0.00081502	0.547007
Alpha-Ketoglutaric Acid	Kpna2	0.0181949	0.549391
L-Threonine	Sdc4	0.0174172	0.552505
Xyluose-5-phosphate	Mtmr1	0.000447503	0.554641
Oxaloacetate	Clec2d	0.00266641	0.554853
D-Ribulose 5-phosphate	Tf	0.000432391	0.555833
Pyruvic acid	Clec2d	0.00248223	0.558161
L-Lactate	Dgat2	0.000586765	0.55916
6-Phosphogluconic acid	Insig2	0.00830522	0.559887
Uracil	Srrm1	0.000343751	0.563675
Uracil	Insig2	0.00744397	0.566303
UMP	Gyg1	0.000314044	0.566712
Pyruvic acid	Insig2	0.00630337	0.575814
L-Threonine	S100a9	0.000227459	0.577316
Acetyl-CoA	Srrm1	0.000189912	0.583093
Xyluose-5-phosphate	Tgfbi	0.000177622	0.585208
Pyruvic acid	Lman2	0.00017733	0.585259
Oxaloacetate	Lman2	0.000170917	0.586417
6-Phosphogluconic acid	Srrm1	0.000162511	0.587996
argininosuccinic acid	Akr1c18	0.00380391	0.590606
D-Glutamine	Tf	0.000147732	0.590958
Trehalose-6-phosphate	Srrm1	0.000147229	0.591063
Alpha-Ketoglutaric Acid	Ilvbl	0.000213428	0.601518
L-Lactate	Tf	0.000101692	0.602288
dUMP	Akr1c18	0.0029839	0.602812
Pyruvic acid	Ilvbl	0.000198288	0.603909
Xyluose-5-phosphate	Dgat2	0.000143065	0.606572
L-cysteine	S100a9	7.85553e-05	0.609877
Xyluose-5-phosphate	Gyg1	7.29977e-05	0.611999
Oxaloacetate	Ilvbl	0.00015172	0.612448
D-Ribulose 5-phosphate	Dgat2	0.000113153	0.613782
Acetyl-CoA	Insig2	0.00288565	0.617038
UMP	Mtmr1	5.31622e-05	0.620997
phosphorylethanolamine	Ilvbl	0.000100352	0.625168
UMP	Eipr1	4.44311e-05	0.625968
L-cysteine	Sdc4	0.00527516	0.627838
L-citrulline	Eipr1	4.02408e-05	0.628677
L-citrulline	Gyg1	4.00899e-05	0.628779
D-Glucose 1-phosphate	Srrm1	2.84174e-05	0.63799
6-Phosphogluconic acid	Kpna2	0.00401356	0.642777
L-Serine	S100a9	2.13232e-05	0.645455
Glyceraldehyde 3-phosphate	Eipr1	2.0357e-05	0.646642
Glucose	Srrm1	1.77846e-05	0.65007
dAMP	Ilvbl	4.10942e-05	0.650864
Glyceraldehyde 3-phosphate	Gabpa	0.0296173	0.652276
ornithine	Ilvbl	3.61325e-05	0.65438
L-Threonine	Lman2	1.35828e-05	0.656787
dUMP	Tgfbi	1.29798e-05	0.657902
Glucose	Clec2d	0.000189964	0.65821
Xyluose-5-phosphate	Eipr1	1.23354e-05	0.659147
dUMP	Gyg1	1.22273e-05	0.659362
dUMP	Ctnnd1	1.1975e-05	0.65987
UMP	Ctnnd1	1.13051e-05	0.661268
Succinyl-CoA	Srrm1	1.09713e-05	0.661992
D-Glucose 1-phosphate	Clec2d	0.00016379	0.663053
L-citrulline	Ctnnd1	9.83752e-06	0.664614
Xyluose-5-phosphate	Ctnnd1	8.50626e-06	0.668068
D-Glutamine	Gabpa	0.0215737	0.679052
Trehalose-6-phosphate	Clec2d	8.27898e-05	0.684288
dUMP	Eipr1	3.66955e-06	0.687203
L-citrulline	Mtmr1	3.48761e-06	0.688316
Glyceraldehyde 3-phosphate	Mtmr1	3.41856e-06	0.688753
L-Serine	Lman2	3.07158e-06	0.691076
Alpha-Ketoglutaric Acid	Lman2	2.95938e-06	0.691879
Succinyl-CoA	Clec2d	5.67272e-05	0.695353
Acetyl-CoA	Kpna2	0.00128192	0.697822
Pyruvic acid	Kpna2	0.00110799	0.704103
Succinyl-CoA	Insig2	0.000323731	0.708627
L-Cystine	Lman2	1.09779e-06	0.712374
L-Lactate	Tgfbi	7.04779e-07	0.721001
D-Fructose 6-phosphate	Kpna2	0.000667548	0.724775
D-Glucose 6-phosphate	Kpna2	0.000593009	0.729361
Trehalose-6-phosphate	Insig2	0.000150099	0.734426
Succinyl-CoA	Lman2	2.83224e-07	0.737804
L-Asparagine	Psmd12	2.75405e-07	0.738301
argininosuccinic acid	Mtmr1	2.38002e-07	0.740873
dUMP	Psmd12	2.31705e-07	0.741343
Succinate/Succinic acid	Ilvbl	7.97925e-07	0.741409
Methylmalonate	Ilvbl	7.70398e-07	0.742079
Xyluose-5-phosphate	Kpna2	0.000284306	0.755957
Succinyl-CoA	Kpna2	0.000240874	0.761536
D-Ribulose 5-phosphate	Gabpa	0.00557496	0.76993
L-Lactate	Gabpa	0.0043734	0.782998
D-Glutamine	Tgfbi	1.44769e-08	0.784985
phosphorylethanolamine	Lman2	1.01462e-08	0.789946
D-Erythrose 4-phosphate	Kpna2	8.13018e-05	0.794743
L-Lactate	Gyg1	6.86019e-09	0.79526
L-Lactate	Mtmr1	5.90208e-09	0.797263
Trehalose-6-phosphate	Kpna2	7.10187e-05	0.798505
Trehalose-6-phosphate	Lman2	3.24258e-09	0.80502
D-Glucose 1-phosphate	Lman2	2.44928e-09	0.80854
L-Asparagine	Mtmr1	1.57112e-09	0.813966
D-Glutamine	Mtmr1	1.54032e-09	0.814204
L-Lactate	Kpna2	3.70034e-05	0.815609
Succinyl-CoA	Ilvbl	6.62142e-09	0.817037
D-Ribulose 5-phosphate	Mtmr1	1.18835e-09	0.817291
D-Glucose 1-phosphate	Insig2	5.91936e-06	0.817948
D-Glucose 1-phosphate	Kpna2	3.36569e-05	0.817961
D-Glucose 1-phosphate	Ilvbl	6.00065e-09	0.818305
L-Lactate	Eipr1	9.22252e-10	0.820253
Glucose	Insig2	5.0542e-06	0.821206
argininosuccinic acid	Eipr1	3.99076e-10	0.829671
Acetyl-CoA	Ilvbl	1.7158e-09	0.833622
D-Ribulose 5-phosphate	Tgfbi	2.41936e-10	0.835038
Trehalose-6-phosphate	Ilvbl	8.71496e-10	0.841316
L-Lactate	Ctnnd1	8.84067e-11	0.845284
6-Phosphogluconic acid	Ilvbl	2.49741e-10	0.854516
argininosuccinic acid	Ctnnd1	2.68433e-11	0.85653
D-Glutamine	Eipr1	2.11099e-11	0.858689
UMP	Gabpa	0.000680293	0.860217
sedoheptulose 7-phosphate	Kpna2	4.65157e-06	0.860341
argininosuccinic acid	Psmd12	1.66504e-11	0.860786
ornithine	Lman2	8.79651e-12	0.866262
Succinate/Succinic acid	Lman2	6.2385e-12	0.869114
Methylmalonate	Lman2	5.50623e-12	0.870135
argininosuccinic acid	Tgfbi	4.94275e-12	0.87101
D-Glutamine	Gyg1	2.15568e-12	0.877532
Acetyl-CoA	Lman2	2.03226e-12	0.877982
D-Glutamine	Ctnnd1	1.12391e-12	0.882405
6-Phosphogluconic acid	Lman2	1.10104e-12	0.882555
dAMP	Lman2	9.63557e-13	0.883526
L-Asparagine	Tgfbi	7.6565e-13	0.885179
Glucose	Kpna2	7.43339e-07	0.890305
Uracil	Ilvbl	3.84696e-12	0.890714
Glucose	Lman2	2.51942e-13	0.892831
argininosuccinic acid	Gyg1	2.26338e-13	0.89354
D-Ribulose 5-phosphate	Eipr1	1.63657e-13	0.895654
D-Ribulose 5-phosphate	Gyg1	1.2819e-13	0.897217
argininosuccinic acid	Gabpa	0.00017593	0.89779
Glucose	Ilvbl	6.5147e-13	0.903098
dUMP	Gabpa	0.000128664	0.904878
D-Ribulose 5-phosphate	Ctnnd1	4.46471e-15	0.916384
L-Asparagine	Eipr1	1.38285e-15	0.922162
L-Asparagine	Gyg1	1.28379e-16	0.932644
L-Asparagine	Gabpa	2.58924e-05	0.934022
L-Asparagine	Ctnnd1	4.14578e-17	0.937105
Uracil	Lman2	1.6041e-22	0.970235
