# Supplementary material for: Multi-omics reveals changed energy metabolism of liver and muscle by caffeine after mice swimming
Source: PeerJ. 2024 Jan 3;12:e16677. doi: 10.7717/peerj.16677 (PMC10771084; doi:10.7717/peerj.16677)
Supplement: Supplemental Information 6 [file peerj-12-16677-s006.xlsx]

## Sheet: Raw data
Energy metabolome of muscle	Raw data of energy metabolome of muscle
Energy metabolome of liver	Raw data of energy metabolome of liver
Proteome of muscle	Raw data of proteome of muscle
Proteome of liver	Raw data of proteome of liver
Lactate levels of plasma	Lactate levels of plasma analyzed by quantitative detection
Glycogen levels of liver	Glycogen levels of liver analyzed by quantitative detection
PEP levels of liver	PEP levels of liver analyzed by quantitative detection
PC levels of liver	PC levels of liver analyzed by quantitative detection

## Sheet: Energy metabolome of muscle
Compounds	CL1	CL2	CL3	CL4	CL5	CL6	CL7	CL8	CL9	FL1	FL2	FL3	FL4	FL5	FL6	FL7	FL8	FL9	mix01	mix02	mix03	mix04
L-Asparagine	1131100	1470800	1058900	1449900	793160	714660	1017500	1164100	943420	1282600	1225100	1059300	970480	1275500	1148200	883460	1232400	1266200	523760	475360	439170	433740
Succinate/Succinic acid	57370	101790	159210	135590	158930	171780	180330	109630	185920	128660	84696	114820	81310	91656	92078	63408	110580	77468	2673400	2477000	2288400	2162900
L-Serine	5164800	7241000	6469900	7167700	4999500	4033800	5222300	5918200	5243900	6473000	6668500	6434400	4956900	6483300	6022000	4995800	6834800	6749400	8837300	8005900	7342000	7630800
L-Aspartate	73683000	96036000	73090000	102950000	64349000	70653000	64928000	75863000	61919000	105510000	80233000	94240000	84003000	96603000	80710000	87038000	83838000	96988000	77128000	73770000	66010000	64865000
L-Threonine	23483000	35168000	33019000	39678000	23354000	18199000	27234000	29051000	30411000	31886000	27673000	26237000	24351000	30393000	28959000	23058000	30792000	28647000	35911000	34597000	32710000	31868000
L-Alanine	355480	325030	374190	413890	331350	274660	379240	371050	438410	261090	231810	229660	300150	263720	280440	203320	252330	304290	584760	571000	596760	554840
Adenine	47898	9	89198	50949	80894	58781	103860	188750	73745	44779	9	42011	648710	9	9	9	9	9	745590	737540	721080	731120
Inosine	508160000	777770000	542180000	883360000	503200000	775010000	550720000	523980000	546530000	641930000	584500000	481220000	472870000	655270000	464170000	505730000	581400000	650020000	308540000	285430000	275240000	259740000
Phenyllactate	1918.8	1597.8	2086.5	2253.3	2052.4	2017.3	1470.8	3291.8	2189.2	3899.7	5033.4	3715.1	5822.5	4034.5	4254	3425.6	5276	2899.7	5028.2	3941.3	4436.8	4414.8
Citrate/Citric acid	6618300	8423700	7476000	7965900	7504300	9100700	9071800	8858600	8934900	5887600	7168700	5655700	6235800	8115500	8179400	7100000	8496500	8900700	3939800	4595300	4516800	4346300
L-Lactate	262080000	295690000	348090000	326450000	349330000	211380000	339890000	263120000	378520000	208790000	151610000	191870000	214380000	175300000	197240000	148910000	117210000	202550000	136490000	126660000	121860000	119120000
ADP	307130	239910	362040	412260	346470	471050	330200	572150	364550	428310	462630	542900	308330	413420	321750	317510	635950	285570	889470	871890	846280	808510
Fumarate/Fumaric acid	7972400	9033000	9223900	9975000	6203800	7239300	7741400	9266700	5596600	11834000	9222600	8680300	10050000	11858000	8487500	8100600	8385200	10722000	22387000	22081000	20468000	19118000
Uracil	3077300	2560900	1588200	3488300	1551500	1973300	1495100	3298800	1122300	4460200	8943000	3345300	3293800	8800000	3389500	3454600	7778000	5594000	34774000	32756000	30901000	30263000
Guanosine	5212100	10848000	4260500	11445000	6024900	11069000	5526600	5482500	5956800	8578600	7815300	6083400	5971300	9854400	6108200	7447800	7646200	8868000	7441700	7172400	6940800	6615500
Thiamine pyrophosphate (TPP)	29956	29019	24928	20840	11951	33501	21976	31032	22891	20414	22259	24043	19342	22099	14757	12969	18685	15239	80672	82332	80834	73023
Glucose	4026800	2813200	3022500	3775800	3495300	1614200	2962100	3055700	3871100	1854000	2534800	1950800	1735900	1268600	2751300	806420	1696000	2438200	20104000	20247000	19813000	19261000
Oxaloacetate	9	9	9	5137.1	9	6960.3	9	9	9	8157.2	7235.4	7478.5	8541.5	8120.8	9461.1	15124	9758.3	6634.1	9834.6	8561.8	9465.1	8056.4
Methylmalonate	81385	114960	167220	154750	194860	200800	229220	127710	218890	125900	95977	109280	80534	114760	121720	76607	137580	89975	3153000	2800700	2773100	2350600
Malate	67910000	78334000	80702000	78189000	49972000	66148000	63322000	77424000	50524000	95534000	79209000	72876000	85887000	94418000	72207000	72130000	72201000	87696000	166860000	159380000	155970000	151200000
L-Glutamate	67796000	104350000	83848000	123670000	71528000	49181000	73059000	66794000	88122000	81582000	61023000	70989000	61411000	76618000	72696000	62407000	89472000	82826000	169230000	157280000	151570000	149240000
Aconitate	227950	315470	288120	323630	284430	354030	355370	301560	311530	220450	263730	219140	239830	296340	295150	294980	352800	330580	156700	203820	149020	154660
L-Tyrosine	13382000	26621000	18670000	25239000	16567000	10582000	20396000	19808000	22991000	28332000	24151000	23600000	21059000	26410000	27184000	19576000	31202000	24671000	13871000	16239000	15639000	14945000
Glyoxylate	141680	127230	138470	155820	162560	136940	153390	139060	173500	114850	115040	122890	121210	107810	117610	112050	84292	134360	108580	95267	102520	130280
NAD+	59043	56371	77162	128290	147170	68930	180850	69220	118230	216770	37055	242420	216990	77460	173890	107770	117320	90660	307960	271610	242880	229590
D-Glucose 6-phosphate	7013700	7969900	7893000	2265800	4736400	399820	4073300	6215700	6710500	314130	313150	193300	292840	645110	186490	165220	563820	423930	2827700	2672000	2501200	2506000
Fructose 1,6-bisphosphate	173850	98704	63791	146170	35600	45911	40217	82314	53542	91663	83331	25273	52878	299020	39346	36809	183990	126180	86368	90708	77063	79454
D-Fructose 6-phosphate	777900	823480	828030	230990	491920	43411	420310	669560	688870	32989	34841	13037	26057	69307	16228	18615	61837	42305	310480	265670	261370	245690
D-Glucose 1-phosphate	680530	709230	711370	582590	489950	9	513480	639230	677070	9	9	9	9	9	9	9	9	9	1838400	1876400	1702800	1578800
Glycerol 3-phosphate	1414400	1175400	1542800	1509200	1056900	1335400	1124900	1313700	1390000	1399400	1129300	998550	1200300	1569700	972600	847950	1621600	1321500	4521300	4289800	4145500	4111200
6-Phosphogluconic acid	3425600	2604000	3437100	3568700	3644300	1248700	3691300	3454300	5659200	1497000	974270	751740	1138100	1454300	1124400	765020	1072700	1422700	14091000	13420000	13275000	12133000
Pyruvic acid	225990	161930	137670	318670	161740	216110	153420	218060	200350	384420	397530	147420	238070	560380	243800	381770	634460	508520	483700	535790	664560	474220
D-Erythrose 4-phosphate	299610	330650	327690	109570	197940	9	182540	278030	273170	18228	14233	9	18015	38303	9	9	26214	17714	168940	152140	138800	147040
sedoheptulose 7-phosphate	7453900	13966000	19136000	10247000	18582000	2922100	19087000	8133000	21407000	2828000	1224800	2837100	2165300	1963900	1395400	1394300	2427500	1409800	5768000	5786600	5225100	5097400
D-Ribulose 5-phosphate	31093000	43296000	41661000	47569000	43366000	42203000	51150000	32371000	49504000	38102000	23127000	30227000	27000000	28173000	28826000	26324000	28741000	32813000	14580000	15238000	14440000	14699000
Flavin mononucleotide	102820	186630	125160	162720	101220	207150	112140	128180	125710	179910	108350	181610	141240	146620	143330	137740	130410	120590	814660	724880	702500	645730
AMP	782800	1616900	1221400	1595000	1111300	1633100	1121500	905490	1158400	1171400	746770	1368200	1133800	920200	1165300	1418300	693110	932960	6092200	5566300	5366400	5301700
GMP	828880	1180800	853420	1538100	1227300	745570	1874100	1312900	1527300	1646300	830240	1679200	1663000	1302300	1493700	1058300	864550	1221400	419530	644520	529950	449160
dAMP	9	9	9	9	9	19960	9	9504.5	9	16479	43599	43612	19401	36461	14592	19070	40788	10289	115890	109320	98442	102910
IMP	340250000	398350000	396330000	449000000	422610000	304400000	440600000	377300000	445440000	421650000	229800000	397620000	412770000	316270000	368160000	303620000	249370000	333610000	204180000	189510000	179430000	176170000
UMP	2593000	2475500	3044400	3380400	5085300	1229500	4893900	2899700	4640500	2029400	514470	1746800	2060500	1041700	1926400	989210	669700	1353400	1311000	1196000	1106400	1053700
dTMP	25913	41951	40090	34297	58254	29877	54660	35630	66431	79983	88915	89790	71864	53657	55075	40380	80820	36201	65603	66425	50981	49767
dUMP	7948.6	11771	7635.9	19323	16109	7346.1	17316	12280	11997	53867	10108	26927	35614	24055	25426	24191	17670	25657	10596	8599.7	8081.9	10604
D-Glutamine	5863600	6371600	6450500	8493700	6257200	5576400	6889500	6503300	6783500	3985000	2780300	3436800	3971600	3629900	5489200	3656200	3480200	4691600	2386600	2198300	2031600	2087100
UDP-GlcNAc	541240	312640	368600	574760	1245200	235410	795610	446810	578600	392530	198300	314040	226500	286530	449390	278690	385830	403470	663590	535930	530090	490410
ATP	5527900	2788100	2791700	3666000	1733500	3689200	2211200	6136700	1910800	5261800	6428600	2330900	3381700	8892100	3132600	3189700	13687000	4422100	16711000	15511000	15497000	15362000
2-Phospho-D-glyceric acid	4785700	4405200	5237300	5373700	4634800	5407500	5835500	4963600	4437900	6092800	5493900	6171500	5572700	5878500	5398900	4791400	6090900	5127200	5123600	5468200	6826100	7100400
Guanosine diphosphate (GDP)	302500	345790	305660	405330	222000	460040	334810	426120	363630	329470	407520	554820	269750	330690	336320	286960	251620	187660	76787	90819	84214	81708
Glyceraldehyde 3-phosphate	576060	565220	561490	536000	398700	404640	360210	416990	473400	9	9	283730	289820	9	9	9	523120	9	451590	341930	329600	336610
Xyluose-5-phosphate	9944400	16355000	15762000	16905000	15713000	19430000	19811000	9917500	20408000	15914000	7632300	14004000	9911400	9162300	12047000	10939000	8805500	10442000	12814000	11372000	10417000	10733000
argininosuccinic acid	427080	538960	764580	484660	251390	363380	349050	528160	313010	690550	692470	410110	811680	915890	500430	532770	583120	756530	224810	230360	206720	201360
phosphorylethanolamine	2332300	1928000	1395000	2444500	1593900	2363300	1507800	3526500	1391200	3518200	4833100	1917800	2576700	7057100	1938100	2677600	5316600	4306600	5895100	5572500	5592000	5492500
L-citrulline	7471700	12732000	10046000	10598000	9370000	6326800	8066500	6503600	11154000	7803800	11803000	5490100	5598100	7741700	9774600	10271000	11962000	7650500	6758500	6305600	6171700	5992500
L-Arginine	118390000	132090000	149860000	141860000	126960000	89983000	127300000	130390000	177470000	117920000	124230000	101850000	132450000	130840000	122450000	94690000	123040000	118880000	79234000	78080000	63002000	58239000
L-Cystine	73706	133380	153400	154170	117520	65104	181030	95817	132660	59651	63496	59467	74296	81079	67953	41162	60510	62992	188450	202590	187770	172350
Acetyl-CoA	7119.2	4658.2	14090	7972.7	9213.9	5737.1	14669	8353.7	17449	3062.4	1542.9	9	1850.8	1028.1	1392.8	1177.9	9	1609.3	29994	27864	23398	19285
Beta-Leucine	91488000	129030000	104040000	130260000	91005000	78005000	103790000	103450000	108250000	128930000	109270000	115420000	108770000	118490000	114560000	97544000	115130000	114570000	128820000	122760000	110040000	105560000
Lysine	103510000	112120000	114950000	131100000	106700000	101180000	117300000	115380000	120930000	89326000	66739000	82305000	90304000	80933000	97695000	73431000	73219000	91106000	52540000	51651000	46026000	45715000
L-cysteine	33216	47523	43522	45852	29088	31523	32612	38549	36259	43907	41553	40443	35434	41125	37473	36947	44272	39274	44451	41911	39039	35031
ornithine	3980100	3970100	9006200	5649700	7026800	4011200	7789200	8706900	5643100	7533300	7052300	6950200	4357200	3018300	3978500	6544200	2645900	8024400	17057000	16715000	15182000	14367000

## Sheet: Energy metabolome of liver
Compounds	CL1	CL2	CL3	CL4	CL5	CL6	CL7	CL8	CL9	FL1	FL2	FL3	FL4	FL5	FL6	FL7	FL8	FL9	mix01	mix02	mix03	mix04
L-Asparagine	57146	56272	58724	84468	85178	95829	82511	44106	30224	106590	136180	141400	173900	161200	230420	264370	110490	139200	523760	475360	439170	433740
Succinate/Succinic acid	3712800	3850100	1675300	6503000	5611200	3321200	3870400	5291000	4614300	4975900	4798500	2501100	4296500	312130	3926400	4354400	2670400	3216300	2673400	2477000	2288400	2162900
L-Serine	8704500	7526400	6257000	9642500	7437800	7949400	6926500	6275000	5884200	12073000	12736000	11394000	13781000	13518000	12445000	15673000	10960000	9721800	8837300	8005900	7342000	7630800
L-Aspartate	51402000	90437000	43083000	58054000	40496000	57144000	66387000	46059000	42296000	65617000	70497000	67659000	75954000	79147000	79755000	104500000	76830000	52525000	77128000	73770000	66010000	64865000
L-Threonine	34611000	33165000	28283000	41394000	35949000	30467000	30378000	27838000	29132000	49664000	41639000	48477000	49090000	46834000	49169000	60768000	47130000	47189000	35911000	34597000	32710000	31868000
L-Alanine	1029300	993440	979100	812250	856920	846030	813000	977490	992270	692810	592510	710580	735610	578790	673030	776460	629500	730090	584760	571000	596760	554840
Adenine	536430	2009100	735750	3147000	2149900	744680	1016900	1064600	1521900	577270	291220	1111700	686920	272030	1185800	1530300	598150	1086700	745590	737540	721080	731120
Inosine	103150000	73069000	66691000	97521000	122930000	115460000	84059000	98913000	86211000	124670000	97240000	104000000	136250000	61210000	108400000	128570000	79825000	116310000	308540000	285430000	275240000	259740000
Phenyllactate	7670.8	9307.4	2646.9	8665.5	8920.1	3258.2	2750.4	2872.7	2909.7	7264	5450.8	8449.1	11281	4170.7	2709.7	6703.1	3110	7286.5	5028.2	3941.3	4436.8	4414.8
Citrate/Citric acid	1365100	1150400	785510	914070	703800	696430	743080	738710	872500	803130	1282900	467240	488080	348740	705110	829770	543160	574350	3939800	4595300	4516800	4346300
L-Lactate	93542000	69400000	84818000	70613000	91859000	94882000	78666000	86492000	62415000	40113000	49315000	48077000	64623000	33152000	53118000	52139000	37700000	59793000	136490000	126660000	121860000	119120000
ADP	884480	827440	583480	817780	943320	727360	755110	791830	746930	964200	887690	788470	1035000	114060	685810	809130	670920	772920	889470	871890	846280	808510
Fumarate/Fumaric acid	23452000	35403000	29569000	31480000	23931000	28489000	34622000	29407000	23849000	24507000	30497000	21788000	29540000	10801000	34413000	27021000	27619000	21132000	22387000	22081000	20468000	19118000
Uracil	47423000	48776000	47034000	52670000	46680000	45992000	45254000	43721000	43691000	46506000	39107000	53165000	51651000	46855000	40252000	41951000	44055000	55782000	34774000	32756000	30901000	30263000
Guanosine	6206900	6166300	4946700	9576100	8210500	5460600	3744900	8743400	8609900	9945100	7412300	6117600	8302200	1880000	6794400	9761600	5799800	6452500	7441700	7172400	6940800	6615500
Thiamine pyrophosphate (TPP)	128700	125690	101050	141590	112820	104740	105970	128190	122620	123930	121630	124530	136900	38228	113300	143570	123840	147550	80672	82332	80834	73023
Glucose	32106000	31288000	34454000	30916000	31491000	27543000	33534000	32368000	33363000	10314000	17679000	22302000	24064000	10991000	25542000	18358000	27058000	22107000	20104000	20247000	19813000	19261000
Oxaloacetate	15229	13086	3719.8	24316	20963	16725	8263.7	29378	24270	10196	15056	7462.4	11218	17778	9774.8	6997.9	5979.3	8800.4	9834.6	8561.8	9465.1	8056.4
Methylmalonate	4125100	4718500	2036700	7629300	6567000	3892900	4448800	6200100	5507400	5851900	5714000	3136900	4959700	363630	4701600	5130700	3036900	3603900	3153000	2800700	2773100	2350600
Malate	177840000	254170000	202160000	227230000	182340000	194950000	243670000	195530000	176600000	183700000	207600000	162480000	210010000	96010000	222050000	194740000	174900000	156890000	166860000	159380000	155970000	151200000
Alpha-Ketoglutaric Acid	4275600	1160900	1321400	2898300	3467300	1122000	1144700	3587600	5464300	2481800	2354000	1016700	2727800	382110	1110000	889710	751370	838420	1149400	965370	851420	728280
L-Glutamate	230840000	209840000	135260000	249680000	193370000	164780000	155930000	217210000	226650000	257710000	260960000	214190000	268420000	158730000	207980000	253230000	193400000	156550000	169230000	157280000	151570000	149240000
Aconitate	51894	54453	40729	50808	27196	34630	36163	39649	34952	58483	68873	24524	29149	9	38926	54757	36300	37260	156700	203820	149020	154660
L-Tyrosine	9042300	14351000	5469400	17219000	11969000	11494000	13419000	11262000	6943100	16091000	14984000	15403000	16379000	18201000	25038000	34689000	18369000	11155000	13871000	16239000	15639000	14945000
Glyoxylate	120540	177450	93624	130650	156930	119840	94897	144780	183520	112440	114510	113740	137290	122270	133680	126900	122280	103570	108580	95267	102520	130280
NAD+	315030	347840	322030	445710	357410	274310	337490	315550	285790	336540	300210	369250	487440	95308	367340	472890	389820	376410	307960	271610	242880	229590
D-Glucose 6-phosphate	5831700	2763600	6336200	2772300	3425200	4302300	3422600	9257200	5219100	892730	1279800	1416800	1777300	385010	2325500	1283500	2118600	1762700	2827700	2672000	2501200	2506000
Fructose 1,6-bisphosphate	100510	108330	136720	123210	141380	135580	125890	136380	115530	125940	135610	128490	137790	69524	138840	158460	132360	128030	86368	90708	77063	79454
D-Fructose 6-phosphate	610000	302540	633060	295700	341840	461400	357050	965760	537600	89398	139350	159380	187190	43878	239000	138400	217420	175840	310480	265670	261370	245690
D-Glucose 1-phosphate	3567100	3196100	4562000	3567400	3039700	2603100	2974200	4393500	4571300	1042000	960750	1891700	2839300	659610	3240300	1479600	3263300	2095800	1838400	1876400	1702800	1578800
Glycerol 3-phosphate	6436100	6195100	4524100	6572700	7698000	5734100	4930900	6367400	5679900	9637800	6571200	7319900	7069500	2174900	6430400	8242900	5981500	7045800	4521300	4289800	4145500	4111200
6-Phosphogluconic acid	29562000	30119000	22188000	26115000	27155000	17965000	22142000	19401000	15635000	16889000	15901000	21987000	24122000	5012700	18885000	18849000	18353000	19806000	14091000	13420000	13275000	12133000
Pyruvic acid	1061500	579920	859800	570900	952610	580360	484530	910080	1267900	458560	544940	366760	649810	305910	392870	524330	253010	506160	483700	535790	664560	474220
D-Erythrose 4-phosphate	354720	240150	348810	214120	249730	263690	214910	480930	282930	85335	102410	134380	165100	40333	164300	117320	161320	151450	168940	152140	138800	147040
sedoheptulose 7-phosphate	11759000	8758100	7089000	8582800	11092000	9134000	8177900	13553000	10555000	2231900	3391800	4785800	6427100	688030	4614600	3729400	5375100	5166900	5768000	5786600	5225100	5097400
D-Ribulose 5-phosphate	7138800	5296600	5249400	5994000	7128500	6164500	6613200	5580400	5783900	4963900	3636100	5055200	8017100	3327000	6128700	4969100	5369200	7210900	14580000	15238000	14440000	14699000
Flavin mononucleotide	1402000	1364600	1120400	1660400	1386900	1027900	1105600	1378600	1646300	1488800	1216900	1240500	1350200	426940	1224400	1307200	1336900	1312700	814660	724880	702500	645730
AMP	8024500	8701400	6029900	10682000	11205000	7653600	7236500	8437500	8184000	13543000	8935900	8944100	9918300	2192500	9269500	10219000	8821900	9222200	6092200	5566300	5366400	5301700
GMP	126850	97438	145540	185050	226940	103670	107880	194520	153160	242310	144350	175050	242940	44412	247500	251020	190200	157640	419530	644520	529950	449160
dAMP	173470	175950	125620	151480	130550	75835	74394	121720	178780	233900	157550	191120	179280	127420	215640	278520	256850	111890	115890	109320	98442	102910
IMP	1906800	1552100	716960	1779800	2403300	1384000	1087900	1527900	1425600	2759100	1388700	1124500	1400200	417320	1374500	1484000	1441300	1285300	204180000	189510000	179430000	176170000
UMP	590180	507680	602550	951930	912300	585490	603140	812430	841340	1287900	800160	648010	840260	313760	867480	880510	927840	731230	1311000	1196000	1106400	1053700
dTMP	40472	47783	48468	52693	64145	52124	46322	79341	80050	107490	86148	52547	77982	69184	97704	113660	116740	52881	65603	66425	50981	49767
dUMP	5655.7	9	9	4278	3965.5	4491.6	2415.5	4286	2998.4	7629.1	1750.3	5718.8	7008.4	4692.2	9	7047.8	4665.5	4395.4	10596	8599.7	8081.9	10604
D-Glutamine	235970	85542	570630	126780	168430	207010	1540700	152580	211120	241460	897070	211790	345090	324360	1624400	441510	1204200	322890	2386600	2198300	2031600	2087100
UDP-GlcNAc	482820	406220	427100	525060	463430	845350	564720	625900	351580	889000	749740	368660	596700	165130	601400	726240	523780	872000	663590	535930	530090	490410
Guanosine -5'-tridiphosphate (GTP)	84834	78941	110530	91873	96912	63439	67240	69749	64916	26985	40266	45672	82094	54782	67734	48585	88448	64623	49754	36481	47454	36210
ATP	12008000	9874100	7149900	11114000	13356000	7937400	10591000	10416000	10365000	12089000	11820000	9546300	12406000	1349100	8836400	11115000	7432000	12041000	16711000	15511000	15497000	15362000
2-Phospho-D-glyceric acid	9	9	9	9	9	9	9	9	9	7087400	9	9	9	6110900	9	12922000	16196000	9	5123600	5468200	6826100	7100400
Trehalose-6-phosphate	150570	164810	147460	225640	134280	101680	158860	110870	194870	16815	37757	92777	112790	12865	118800	46766	135050	95864	66408	55983	60830	55380
Guanosine diphosphate (GDP)	29704	28447	338800	136370	18078	241020	71396	125480	119400	309360	94884	187900	38330	193910	234820	179740	510190	71592	76787	90819	84214	81708
Glyceraldehyde 3-phosphate	9	9	9	9	9	9	9	9	9	250690	342220	9	9	9	9	287380	9	9	451590	341930	329600	336610
Xyluose-5-phosphate	11016000	11799000	9743700	10315000	8910100	8713400	8007700	8153200	7891600	3428200	3222300	6889200	9648200	1337600	8781400	3743200	7971200	6131700	12814000	11372000	10417000	10733000
argininosuccinic acid	25070	43820	26508	39520	27763	28800	28893	23134	17493	32226	37881	30042	51651	11795	51207	50139	24578	27518	224810	230360	206720	201360
phosphorylethanolamine	8804800	7498300	6747900	8962900	9115200	4424700	6717000	7718800	7274800	13731000	6026700	10810000	9302000	4715100	7234400	7631100	7126700	11526000	5895100	5572500	5592000	5492500
L-citrulline	4233900	4984900	4549800	6078500	4071400	4109600	3673200	4930100	4398000	5880200	7595200	6451000	5859800	4762100	8263200	8803600	7101400	5771100	6758500	6305600	6171700	5992500
L-Arginine	2681900	1900100	1521900	896910	767020	669280	1388500	599140	540810	686920	639020	957900	1025100	715790	984310	696710	572680	792280	79234000	78080000	63002000	58239000
L-Cystine	522410	525270	207750	179750	242540	582700	318750	395540	525230	322880	267740	262900	433120	294590	736460	1128100	777960	175070	188450	202590	187770	172350
Acetyl-CoA	64060	52132	54841	60418	64364	38810	55886	44873	37165	43287	36003	47751	45457	6166.1	46063	42352	46689	53790	29994	27864	23398	19285
Succinyl-CoA	11910	7903.7	7489.6	5173.4	5024.7	7961.5	7847.4	10354	9029.5	9	3457.8	2513.8	5385.6	9	5977.3	3377.3	4267.6	2054.2	4040	3390.4	3563.3	3125.9
NADPH	32774	27386	22439	34738	40492	34335	24079	36706	30900	30041	44990	24167	35995	11803	40913	43159	41136	23816	25572	30292	29531	23371
Beta-Leucine	112040000	115610000	94935000	128010000	112660000	101720000	101880000	99925000	96219000	136880000	116200000	138020000	147780000	143130000	139170000	160400000	125020000	124490000	128820000	122760000	110040000	105560000
Lysine	10929000	4427100	21758000	6318100	7902700	10363000	34907000	8440900	9609000	12434000	25338000	10067000	13998000	13530000	37411000	18711000	31071000	13121000	52540000	51651000	46026000	45715000
L-cysteine	31731	28642	25806	42372	36712	29078	32058	24889	27549	51257	43243	51234	51459	55041	55628	59964	48678	48434	44451	41911	39039	35031
ornithine	15831000	20119000	13773000	18189000	12745000	16637000	18003000	14507000	10778000	22033000	21387000	23871000	24843000	26578000	25598000	31958000	24517000	21286000	17057000	16715000	15182000	14367000

## Sheet: Proteome of muscle
Protein accession	Protein description	Gene name	Coverage [%]	Peptides	PSMs	Unique Peptides	MW [kDa]	Intensity CM1	Intensity CM2	Intensity CM3	Intensity CM4	Intensity CM5	Intensity CM6	Intensity CM7	Intensity CM8	Intensity CM9	Intensity FM1	Intensity FM2	Intensity FM3	Intensity FM4	Intensity FM5	Intensity FM6	Intensity FM7	Intensity FM8	Intensity FM9
Q62241	U1 small nuclear ribonucleoprotein C OS=Mus musculus OX=10090 GN=Snrpc PE=1 SV=1	Snrpc	6	1	14	1	17.4	437391	421483	551694	645749	788072	354820	712268	571570	707141		411952	477052	326850	521717	622855		518841	613143
P27005	Protein S100-A8 OS=Mus musculus OX=10090 GN=S100a8 PE=1 SV=3	S100a8	22	1	18	1	10.3	1.87864e+06	799609	584362	833908	1.18229e+06	438958	972588	749946	437889	2.26744e+06	2.0329e+06	468232	2.13118e+06	2.76171e+06	6.16122e+06	485147	426420	1.09725e+06
Q91V61	Sideroflexin-3 OS=Mus musculus OX=10090 GN=Sfxn3 PE=1 SV=1	Sfxn3	14	3	26	2	35.4	613007	410757	315445	179999	407812	1.58998e+06	524446	2.85264e+06	2.88237e+06	2.60312e+06	3.20484e+06	1.92998e+06	2.40525e+06	2.21198e+06	1.52488e+07	1.26403e+06	2.84453e+06	609221
P62317	Small nuclear ribonucleoprotein Sm D2 OS=Mus musculus OX=10090 GN=Snrpd2 PE=1 SV=1	Snrpd2	42	4	21	4	13.5	2.06841e+06	2.20564e+06	1.82274e+06	2.46541e+06	2.9173e+06	2.64019e+06	2.68414e+06	2.21697e+06	1.99519e+06	2.22709e+06	1.88323e+06	1.90548e+06	1.7538e+06	3.5779e+06	4.94959e+06	1.90209e+06	2.18462e+06	2.95588e+06
Q91YE8	Synaptopodin-2 OS=Mus musculus OX=10090 GN=Synpo2 PE=1 SV=2	Synpo2	24	17	296	17	116.5	1.08556e+08	9.64539e+07	8.49427e+07	1.01276e+08	8.82716e+07	7.0661e+07	8.07246e+07	8.16577e+07	8.82485e+07	9.0182e+07	8.90112e+07	1.03667e+08	8.71771e+07	1.14102e+08	8.23899e+07	8.3011e+07	9.80693e+07	8.14517e+07
Q9R099	Transducin beta-like protein 2 OS=Mus musculus OX=10090 GN=Tbl2 PE=1 SV=2	Tbl2	5	2	16	2	49.6	357571	147165	114630	93668.7	479866	342934	267946	265005	768951	431620	330212	347324	290078	422012	604762	430291	198462	578698
Q69ZZ6	Transmembrane and coiled-coil domains protein 1 OS=Mus musculus OX=10090 GN=Tmcc1 PE=1 SV=2	Tmcc1	3	1	2	1	71.6
Q8JZU2	Tricarboxylate transport protein, mitochondrial OS=Mus musculus OX=10090 GN=Slc25a1 PE=1 SV=1	Slc25a1	15	5	15	5	33.9	6.88838e+06	3.26225e+06	2.10905e+06	1.90079e+06	2.33662e+06	2.89649e+06	1.3283e+06	1.27843e+06	5.36176e+06	1.58943e+06	1.02397e+06	2.09124e+06	1.83799e+06	2.20279e+06	1.73091e+07	2.0226e+06	298518	4.26289e+06
Q3TW96	UDP-N-acetylhexosamine pyrophosphorylase-like protein 1 OS=Mus musculus OX=10090 GN=Uap1l1 PE=1 SV=1	Uap1l1	11	4	19	4	56.6	559261	637270	81486.5	2.81435e+06	921104	224481	421259	862620	1.10319e+06	1.06137e+06	748469	624853	588885	241318	1.66933e+06	1.00593e+06	786829	235522
Q61838	Pregnancy zone protein OS=Mus musculus OX=10090 GN=Pzp PE=1 SV=3	Pzp	34	37	453	37	165.7	6.49247e+07	5.36781e+07	1.07318e+08	7.43496e+07	9.18265e+07	2.9224e+07	8.68289e+07	8.40802e+07	1.03023e+08	7.09583e+07	7.65758e+07	9.0373e+07	5.44523e+07	6.0192e+07	1.6008e+08	8.82375e+07	7.75996e+07	7.19042e+07
P52196	Thiosulfate sulfurtransferase OS=Mus musculus OX=10090 GN=Tst PE=1 SV=3	Tst	29	8	99	7	33.4	9.27885e+06	1.37142e+07	1.06857e+07	1.08824e+07	9.36358e+06	1.05564e+07	1.50618e+07	1.03109e+07	1.41786e+07	1.02047e+07	1.07039e+07	1.15347e+07	9.72298e+06	8.43829e+06	1.26759e+07	9.78654e+06	9.54079e+06	1.16394e+07
P62073	Mitochondrial import inner membrane translocase subunit Tim10 OS=Mus musculus OX=10090 GN=Timm10 PE=1 SV=1	Timm10	17	2	19	2	10.3	386202	2.47281e+06	1.50884e+06	2.61138e+06	3.54566e+06	1.36579e+06	1.74269e+06	1.55002e+06	900221	1.93068e+06	1.37805e+06	1.98817e+06	3.08965e+06	2.49905e+06	1.59585e+06	1.2919e+06	1.56157e+06	2.4685e+06
G5E870	E3 ubiquitin-protein ligase TRIP12 OS=Mus musculus OX=10090 GN=Trip12 PE=1 SV=1	Trip12	2	2	19	2	224	119527	157132	248138	315691	420154	115069	226979	253978	314399	238065	290926	216042	168779	95444	175585	239228	299671	225733
P62257	Ubiquitin-conjugating enzyme E2 H OS=Mus musculus OX=10090 GN=Ube2h PE=1 SV=1	Ube2h	14	2	6	2	20.6	1.01583e+07	3.98955e+06	1.02357e+06	7.76487e+06	1.03127e+07	2.81753e+06	3.06787e+06	3.56965e+06	6.21173e+06	7.72633e+06	758576	5.84209e+06	3.47943e+06	1.9169e+06	783410	3.61831e+06	3.98263e+06	1.43129e+06
P63024	Vesicle-associated membrane protein 3 OS=Mus musculus OX=10090 GN=Vamp3 PE=1 SV=1	Vamp3	32	2	13	2	11.5	835094	908980	925198	1.19785e+06	1.5493e+06		770474	1.07314e+06	1.6571e+06	1.25926e+06	1.03081e+06	1.17288e+06	1.21769e+06	1.15287e+06	1.54577e+06	1.04233e+06	972524	1.34833e+06
Q8CJ67	Double-stranded RNA-binding protein Staufen homolog 2 OS=Mus musculus OX=10090 GN=Stau2 PE=1 SV=1	Stau2	3	1	6	1	62.5	303161	278685	152014	477452	300295				271617	160456				138776		83559.5	170458
Q9D6K5	Synaptojanin-2-binding protein OS=Mus musculus OX=10090 GN=Synj2bp PE=1 SV=1	Synj2bp	23	3	77	3	15.8	2.50906e+06	2.46081e+06	1.98792e+06	2.66551e+06	3.85826e+06	2.25992e+06	5.71609e+06	3.41021e+06	5.84978e+06	5.37272e+06	1.23108e+06	3.75044e+06	2.25147e+06	2.33302e+06	1.32543e+06	1.48326e+06	2.26215e+06	3.9186e+06
Q68FL6	Methionine--tRNA ligase, cytoplasmic OS=Mus musculus OX=10090 GN=Mars1 PE=1 SV=1	Mars1	18	13	100	13	101.4	6.03337e+06	6.70886e+06	5.50862e+06	7.35053e+06	9.34447e+06	6.93086e+06	4.90406e+06	5.88283e+06	7.37902e+06	5.6534e+06	7.31747e+06	4.10157e+06	5.19428e+06	4.85851e+06	5.88279e+06	5.97594e+06	6.90784e+06	7.58029e+06
Q8VCH0	3-ketoacyl-CoA thiolase B, peroxisomal OS=Mus musculus OX=10090 GN=Acaa1b PE=1 SV=1	Acaa1b	22	5	48	1	44					108667		943804	141006				265249						274049
Q9R0Q7	Prostaglandin E synthase 3 OS=Mus musculus OX=10090 GN=Ptges3 PE=1 SV=1	Ptges3	11	1	8	1	18.7	802997	3.3866e+06	3.91731e+06	2.18461e+06	3.055e+06	2.23135e+06	2.95056e+06	2.42718e+06	2.59435e+06	2.862e+06	1.72552e+06	2.79932e+06	2.31988e+06	1.0456e+06	4.39627e+06	1.26455e+06	2.33424e+06	1.91574e+06
Q9CQE2	Transmembrane protein 223 OS=Mus musculus OX=10090 GN=Tmem223 PE=2 SV=1	Tmem223	8	2	6	2	21.8	1.4774e+06	1.30778e+06	590567	994708	1.77718e+06	833513	1.1113e+06	822481	1.93089e+06	1.31885e+06	536550	1.15353e+06	864746	577445	849295	1.00494e+06	793488	1.11981e+06
Q9CPQ3	Mitochondrial import receptor subunit TOM22 homolog OS=Mus musculus OX=10090 GN=Tomm22 PE=1 SV=3	Tomm22	16	2	22	2	15.5	581136	264171	310766	431716	644191	534046	461753	53702.3	678772	496582	297813	803888	432583	498626	347329	353273	395464	316246
P86449	Tripartite motif-containing protein 43C OS=Mus musculus OX=10090 GN=Trim43c PE=2 SV=1	Trim43c	3	1	58	1	52.5	7.36775e+06	1.10488e+07	9.80248e+06	9.97187e+06	1.0206e+07	1.18165e+07	10215495	8.35355e+06	9.45054e+06	8.83201e+06	1.05418e+07	8.1936e+06	9.40347e+06	6.56258e+06	7.19662e+06	7.62398e+06	9.78003e+06	8.70467e+06
Q9CZW5	Mitochondrial import receptor subunit TOM70 OS=Mus musculus OX=10090 GN=Tomm70 PE=1 SV=2	Tomm70	17	10	103	10	67.5	6.99337e+06	6.6409e+06	5.40724e+06	7.87756e+06	8.54196e+06	6.80028e+06	6.89991e+06	7.65093e+06	8.79051e+06	7.04834e+06	5.55685e+06	9.28497e+06	5.38692e+06	6.78413e+06	7.82049e+06	6.87731e+06	7.50441e+06	8.78065e+06
Q9QZ47	Troponin T, fast skeletal muscle OS=Mus musculus OX=10090 GN=Tnnt3 PE=1 SV=3	Tnnt3	39	19	1192	16	32.2	2.08698e+09	1.94019e+09	2.00444e+09	1.89515e+09	1.55333e+09	2.72724e+09	3.1921e+09	2.36873e+09	1.91942e+09	2.5098e+09	2.15437e+09	2.61946e+09	2.40418e+09	3.14942e+09	2.72339e+09	2.91266e+09	2.37432e+09	2.08217e+09
E9Q9K5	Triadin OS=Mus musculus OX=10090 GN=Trdn PE=1 SV=1	Trdn	21	15	303	15	77.8	1.15216e+08	1.03985e+08	1.19546e+08	1.37388e+08	1.12531e+08	1.4069e+08	1.18317e+08	1.15911e+08	1.06498e+08	1.00963e+08	9.56227e+07	9.10873e+07	1.0424e+08	1.09161e+08	1.15219e+08	1.24011e+08	1.34881e+08	1.3942e+08
Q8VBT0	Thioredoxin-related transmembrane protein 1 OS=Mus musculus OX=10090 GN=Tmx1 PE=1 SV=1	Tmx1	4	1	11	1	31.4	411946		199504	178692			268048	508666	615642	263256	435840	742398	390835	505419	767789	478209	448595	224520
Q99NB8	Ubiquilin-4 OS=Mus musculus OX=10090 GN=Ubqln4 PE=1 SV=1	Ubqln4	4	2	15	1	63.5	154883	357435	129594	155061	126510	245652	277012	265417	435801	338190	134621	164080	162728	136156	192119	212132	234724	252025
P70691	UDP-glucuronosyltransferase 1-2 OS=Mus musculus OX=10090 GN=Ugt1a2 PE=1 SV=1	Ugt1a2	6	3	4	3	60.2		326432	231460	665967	92946.5	814634	2.13597e+06	1.09993e+06	161829	413422	351512	1.4122e+06	273673	649591	1.32996e+06	124128	183844	1.62544e+06
P63147	Ubiquitin-conjugating enzyme E2 B OS=Mus musculus OX=10090 GN=Ube2b PE=1 SV=1	Ube2b	24	2	23	1	17.3	1.65801e+06	4.03652e+06	4.27601e+06	3.58392e+06	3.95435e+06	4.56067e+06	2926931	2.11589e+06	2.90172e+06	3.16055e+06	2.12334e+06	2.30845e+06	1.67739e+06	3.64984e+06	1.44588e+06	1.49869e+06	1.65382e+06	1.84172e+06
Q8C0E2	Vacuolar protein sorting-associated protein 26B OS=Mus musculus OX=10090 GN=Vps26b PE=1 SV=1	Vps26b	11	3	33	3	39.1	1.09192e+06	1.04442e+06	1.06334e+06	1.2121e+06	1.46491e+06	1.28976e+06	1.32149e+06	563955	1.06711e+06	1.14879e+06	1.14661e+06	1.22985e+06	1.28831e+06	1.35925e+06	1.51837e+06	1.02103e+06	1.12716e+06	1.06899e+06
P62918	60S ribosomal protein L8 OS=Mus musculus OX=10090 GN=Rpl8 PE=1 SV=2	Rpl8	14	3	37	3	28	1.87233e+06	2.41058e+06	1.33658e+06	2.03891e+06	3.51772e+06	2.73405e+06	4.51733e+06	3.6174e+06	4.61056e+06	3.21715e+06	4.71035e+06	3.29005e+06	4.03236e+06	5.00868e+06	6.95028e+06	5.19718e+06	2.9787e+06	3.27134e+06
Q9DBG6	Dolichyl-diphosphooligosaccharide--protein glycosyltransferase subunit 2 OS=Mus musculus OX=10090 GN=Rpn2 PE=1 SV=1	Rpn2	31	12	164	12	69	1.49037e+07	1.51303e+07	9.15643e+06	1.46462e+07	1.28031e+07	1.23819e+07	1.40989e+07	1.2118e+07	1.59249e+07	1.03383e+07	1.35963e+07	9.08691e+06	1.08594e+07	1.0117e+07	1.55776e+07	1.05464e+07	8.97028e+06	1.70135e+07
Q99K70	Ras-related GTP-binding protein C OS=Mus musculus OX=10090 GN=Rragc PE=1 SV=1	Rragc	5	2	19	2	44.1	1.44784e+06	1.32218e+06	1.60277e+06	1.65862e+06	1.72152e+06	1.30933e+06	896773	1.23893e+06	1.75196e+06	461399	1.60625e+06	1.08054e+06	1.35689e+06	2.09855e+06	2.24165e+06	1.93934e+06	968111	1.40232e+06
Q9WTM5	RuvB-like 2 OS=Mus musculus OX=10090 GN=Ruvbl2 PE=1 SV=3	Ruvbl2	6	2	21	2	51.1	1.1746e+06	1.22622e+06	1.04892e+06	1.29425e+06	1.03521e+06	500336	791043	1.04791e+06	1.21644e+06	1.1108e+06	887003	782798	785579	799292	1.29543e+06	694031	860595	887866
Q3TDQ1	Dolichyl-diphosphooligosaccharide--protein glycosyltransferase subunit STT3B OS=Mus musculus OX=10090 GN=Stt3b PE=1 SV=2	Stt3b	8	5	56	5	93.2	4.16376e+06	2.53152e+06	1.66638e+06	3.55884e+06	2.30173e+06	2.46083e+06	3.69039e+06	3.39773e+06	5.23764e+06	3.96352e+06	3.98917e+06	3.61097e+06	1.83227e+06	788406	3.37824e+06	2.19488e+06	4.36165e+06	4.26704e+06
Q9Z1Z2	Serine-threonine kinase receptor-associated protein OS=Mus musculus OX=10090 GN=Strap PE=1 SV=2	Strap	18	6	73	6	38.4	7.22016e+06	8.24306e+06	7.10696e+06	7.35183e+06	5.44864e+06	6.81299e+06	6.23909e+06	6.10742e+06	5.08074e+06	6.94929e+06	6.20589e+06	7.1642e+06	7.31903e+06	8.57957e+06	7.37499e+06	6.7702e+06	7.48485e+06	7.27741e+06
Q9ERP3	Tripartite motif-containing protein 54 OS=Mus musculus OX=10090 GN=Trim54 PE=1 SV=1	Trim54	37	10	101	9	41.1	1.0617e+07	1.31783e+07	1.51332e+07	1.67885e+07	1.76317e+07	1.09473e+07	1.1366e+07	1.02177e+07	1.69704e+07	1.21331e+07	1.50717e+07	1.14871e+07	9.41833e+06	1.10857e+07	1.01117e+07	8.1362e+06	1.20745e+07	1.56667e+07
Q8CC21	Tetratricopeptide repeat protein 19, mitochondrial OS=Mus musculus OX=10090 GN=Ttc19 PE=1 SV=1	Ttc19	10	4	9	4	41.2	1.4247e+06	753852	907935	1.49412e+06	1.22579e+06	491103	529709	426013	1.08886e+06	1.12368e+06	480272	1.38526e+06	459353	1.41922e+06	79183	330388	1.0004e+06
Q923G2	DNA-directed RNA polymerases I, II, and III subunit RPABC3 OS=Mus musculus OX=10090 GN=Polr2h PE=1 SV=3	Polr2h	9	1	17	1	17.1	685402	624542	748831	684513	1.11693e+06	599567	539905	738715	689161	711463	736954	642067	644923	568940	726293	661962	575537	706114
P14131	40S ribosomal protein S16 OS=Mus musculus OX=10090 GN=Rps16 PE=1 SV=4	Rps16	44	7	135	7	16.4	2.32783e+07	1.92432e+07	1.63928e+07	2.2845e+07	1.85942e+07	1.8759e+07	2.22495e+07	2.15167e+07	3.23437e+07	2.29323e+07	2.26273e+07	1.73128e+07	2.18735e+07	2.88814e+07	3.86517e+07	2.92632e+07	2.90571e+07	3.44414e+07
Q6ZWN5	40S ribosomal protein S9 OS=Mus musculus OX=10090 GN=Rps9 PE=1 SV=3	Rps9	42	10	150	10	22.6	2.65727e+07	3.69093e+07	2.32486e+07	3.14639e+07	2.32204e+07	3.50628e+07	3.18016e+07	3.88716e+07	4.22045e+07	3.88374e+07	3.57882e+07	3.1802e+07	3.24253e+07	3.11564e+07	4.29076e+07	4.28964e+07	3.94254e+07	3.94756e+07
Q9D0G0	28S ribosomal protein S30, mitochondrial OS=Mus musculus OX=10090 GN=Mrps30 PE=1 SV=1	Mrps30	10	3	5	3	49.9	887768			732639					432510	304176		303890		322838		208685	118108	91264.6
P62342	Thioredoxin reductase-like selenoprotein T OS=Mus musculus OX=10090 GN=Selenot PE=1 SV=2	Selenot	32	5	48	5	22.3	2.62189e+06	3.10879e+06	3.69315e+06	3.36477e+06	3.01736e+06	3.95592e+06	3.5107e+06	3.47083e+06	3.84007e+06	3.39301e+06	3.58893e+06	3.37263e+06	3.96046e+06	3.26248e+06	3.49292e+06	3.61188e+06	3.68537e+06	4.14288e+06
P19324	Serpin H1 OS=Mus musculus OX=10090 GN=Serpinh1 PE=1 SV=3	Serpinh1	36	11	186	11	46.5	3.29932e+07	2.4896e+07	1.08856e+07	1.87036e+07	4.18347e+07	6.53768e+06	2.3338e+07	2.26626e+07	3.94399e+07	2.12023e+07	2.39409e+07	1.92078e+07	1.53408e+07	3.35902e+07	4.1719e+07	3.03059e+07	3.18026e+07	3.49094e+07
Q9EPB5	Serine hydrolase-like protein OS=Mus musculus OX=10090 GN=Serhl PE=1 SV=1	Serhl	10	2	26	2	35.3	949462	712774	676471	1.26126e+06	1.64869e+06	488084	731582	688879	954379	867516	431435	889655	400705	438448	548956	522095	616030	607226
Q3TMH2	Secernin-3 OS=Mus musculus OX=10090 GN=Scrn3 PE=1 SV=1	Scrn3	33	11	148	11	47.6	2.72778e+07	2.29407e+07	2.39687e+07	3.40538e+07	2.15813e+07	1.82404e+07	1.75504e+07	1.61829e+07	1.96043e+07	1.64527e+07	1.9465e+07	1.52728e+07	1.60158e+07	3.85415e+07	1.96418e+07	1.89137e+07	2.03992e+07	1.57089e+07
Q99LM3	Smoothelin-like protein 1 OS=Mus musculus OX=10090 GN=Smtnl1 PE=1 SV=1	Smtnl1	24	9	52	9	49.5	1.34691e+08	7.45054e+07	1.26804e+08	1.58044e+08	1.46687e+08	1.27263e+08	1.1464e+08	1.11088e+08	1.12186e+08	1.34021e+08	1.18075e+08	1.21859e+08	1.14304e+08	9.37692e+07	9.13257e+07	1.00591e+08	1.59149e+08	1.20007e+08
Q9Z2I9	Succinate--CoA ligase [ADP-forming] subunit beta, mitochondrial OS=Mus musculus OX=10090 GN=Sucla2 PE=1 SV=2	Sucla2	53	27	685	27	50.1	4.47187e+08	3.32092e+08	2.73836e+08	3.36543e+08	6.44875e+08	3.40181e+08	3.5999e+08	3.28599e+08	4.60269e+08	4.29031e+08	2.72805e+08	4.95247e+08	4.04394e+08	3.53242e+08	2.88407e+08	3.38441e+08	3.88078e+08	3.04115e+08
Q62264	Thyroid hormone-inducible hepatic protein OS=Mus musculus OX=10090 GN=Thrsp PE=1 SV=1	Thrsp	15	2	2	2	17.1	1.85197e+06	2.25333e+06	2.04338e+06	1.19624e+06	932727	1.49704e+06	124946	1.94207e+06	2.41201e+06	2.06723e+06	2.44252e+06	1.87601e+06	2.14791e+06	2.43371e+06	3.35719e+06	1.1521e+06	2.22771e+06	1.99093e+06
Q9CQV7	Mitochondrial import inner membrane translocase subunit TIM14 OS=Mus musculus OX=10090 GN=Dnajc19 PE=1 SV=3	Dnajc19	12	2	4	2	12.4	107730	711388	688948	663737		539500	909415		1.94558e+06	1.09564e+06	905903	1.0478e+06	370444	523596	1.03537e+06	633203	725264
P56695	Wolframin OS=Mus musculus OX=10090 GN=Wfs1 PE=1 SV=1	Wfs1	12	10	79	10	100.5	4.30234e+07	6.55457e+07	4.44853e+07	6.11699e+07	6.30434e+07	5.52627e+07	5.16681e+07	4.87778e+07	7.75318e+07	5.25505e+07	6.09109e+07	4.99205e+07	5.47994e+07	4.69878e+07	5.09211e+07	4.5719e+07	4.28599e+07	5.3754e+07
Q99LB7	Sarcosine dehydrogenase, mitochondrial OS=Mus musculus OX=10090 GN=Sardh PE=1 SV=1	Sardh	10	6	9	6	101.6	432922	278040	293904	369052	657379	155888	3.20217e+06	288050	723503	354469		614511			771343	898177		342440
Q9QZI8	Serine incorporator 1 OS=Mus musculus OX=10090 GN=Serinc1 PE=1 SV=1	Serinc1	3	1	4	1	50.5
Q3UHD6	Sorting nexin-27 OS=Mus musculus OX=10090 GN=Snx27 PE=1 SV=2	Snx27	4	2	6	2	61	334498			103846	236426	44486.9	60665.9		291938	80712.2		169900	52090.9				777722	934740
P01831	Thy-1 membrane glycoprotein OS=Mus musculus OX=10090 GN=Thy1 PE=1 SV=1	Thy1	32	4	30	4	18.1	1.48832e+06	784337	516435	285576	935380	322381	946040	1.1811e+06	1.72243e+06	531889	819766	951980	1.1013e+06	1.83071e+06	3.36204e+06	828306	986416	1.71637e+06
Q9QYA2	Mitochondrial import receptor subunit TOM40 homolog OS=Mus musculus OX=10090 GN=Tomm40 PE=1 SV=3	Tomm40	14	3	32	3	37.9	5.39084e+06	4.20647e+06	3.54182e+06	5.75665e+06	8.72245e+06	5.23195e+06	3.71766e+06	3.13897e+06	5.63691e+06	4.69727e+06	3.50794e+06	5.79608e+06	3.09994e+06	2.9263e+06	3.40797e+06	2.9558e+06	3.9031e+06	4.85783e+06
O70274	Protein tyrosine phosphatase type IVA 2 OS=Mus musculus OX=10090 GN=Ptp4a2 PE=1 SV=1	Ptp4a2	13	2	25	1	19.1	536444	385378	944423	75133.6	956249	641669	315433	404178	1.0662e+06	1.11587e+06	1.01897e+06	1.01553e+06	769977	1.14924e+06	907047	914303	983099	1.20146e+06
O70481	E3 ubiquitin-protein ligase UBR1 OS=Mus musculus OX=10090 GN=Ubr1 PE=1 SV=2	Ubr1	1	1	7	1	200.1	598010	389700	379356	574209	732046	325890	417694	234927	263796	265479	275200	189843	208263	290012	308972	380552	337106	317405
P61082	NEDD8-conjugating enzyme Ubc12 OS=Mus musculus OX=10090 GN=Ube2m PE=1 SV=1	Ube2m	21	4	36	4	20.9	2.1737e+07	2.08923e+07	2.47231e+07	2.41473e+07	2.37294e+07	4.74941e+07	3.80141e+07	3.08826e+07	2.02486e+07	2.64002e+07	2.70991e+07	3.83179e+07	4.17246e+07	3.49647e+07	3.27759e+07	3.75795e+07	2.83808e+07	2.73423e+07
P83741	Serine/threonine-protein kinase WNK1 OS=Mus musculus OX=10090 GN=Wnk1 PE=1 SV=2	Wnk1	1	1	8	1	250.8	170627	198630	279123	269155	236012	203368	133910	220893	209700	257723	231505	96700	137931	197611	253600	118684	183677	176850
Q3UFS0	Protein zyg-11 homolog B OS=Mus musculus OX=10090 GN=Zyg11b PE=1 SV=2	Zyg11b	3	2	22	2	83.9	463652	443979	261230	539886	618034	284828	264267	340560	384538	447544	297920	347928	263988	331358	269589	416758	418747	410010
P52633	Signal transducer and transcription activator 6 OS=Mus musculus OX=10090 GN=Stat6 PE=1 SV=2	Stat6	2	1	1	1	93.4
Q9D1E6	Tubulin-folding cofactor B OS=Mus musculus OX=10090 GN=Tbcb PE=1 SV=2	Tbcb	23	5	39	5	27.4	775546	774584	1.49135e+06	1.16944e+06	1.81082e+06	1.7277e+06	1.44956e+06	1.63632e+06	1.96926e+06	1.49159e+06	2.3326e+06	1.61171e+06	1.44008e+06	1.27139e+06	1.27187e+06	2.37034e+06	1.53805e+06	1.20736e+06
Q9ERD7	Tubulin beta-3 chain OS=Mus musculus OX=10090 GN=Tubb3 PE=1 SV=1	Tubb3	37	15	348	1	50.4	870719	1.78682e+06		1.88537e+06	4.97747e+06	469694	5.17994e+06	2.17395e+06	2.77261e+06	1.42966e+06	785480	727427	1.15029e+06	2.44604e+06	906089	532210	2.77823e+06	1.72163e+06
Q9Z1Q9	Valine--tRNA ligase OS=Mus musculus OX=10090 GN=Vars1 PE=1 SV=1	Vars1	16	16	111	16	140.1	1.0901e+07	1.18179e+07	6.9891e+06	8.46146e+06	1.04319e+07	1.26718e+07	1.04488e+07	1.11311e+07	1.11125e+07	9.85509e+06	1.31993e+07	1.07479e+07	1.45925e+07	1.44705e+07	1.36551e+07	1.43175e+07	8.89668e+06	1.59506e+07
P19221	Prothrombin OS=Mus musculus OX=10090 GN=F2 PE=1 SV=1	F2	36	16	117	16	70.2	1.02708e+07	8.25475e+06	1.27783e+07	7.31107e+06	1.12127e+07	6.67933e+06	8.19735e+06	9.76149e+06	1.11451e+07	1.08379e+07	8.15686e+06	7.42523e+06	5.95951e+06	5.52517e+06	1.69998e+07	9.384e+06	8.25965e+06	7.724e+06
Q38HM4	E3 ubiquitin-protein ligase TRIM63 OS=Mus musculus OX=10090 GN=Trim63 PE=1 SV=1	Trim63	9	2	10	1	39.5	346416	678493		730619	576544		456231		492640		288545		252666					1.09378e+06
Q9CR67	Transmembrane protein 33 OS=Mus musculus OX=10090 GN=Tmem33 PE=1 SV=1	Tmem33	13	3	14	3	28	2.14985e+06	1.426e+06	506938	1.49179e+06	2.20288e+06		1.67773e+06	1.82346e+06	1.74252e+06	1.47593e+06	1.2841e+06	2.87105e+06	1.56126e+06	1.97946e+06	2.86011e+06	1.86421e+06	1.33807e+06	2.10589e+06
Q9CQM5	Thioredoxin domain-containing protein 17 OS=Mus musculus OX=10090 GN=Txndc17 PE=1 SV=1	Txndc17	32	3	60	3	14	4.39076e+06	5.90265e+06	4.84443e+06	4.72689e+06	8.4062e+06	6.33097e+06	5.61911e+06	5.83207e+06	9.52419e+06	5.87442e+06	6.09446e+06	5.99157e+06	6.42461e+06	2.88024e+06	5.30262e+06	3.73586e+06	4.31853e+06	5.36067e+06
Q05920	Pyruvate carboxylase, mitochondrial OS=Mus musculus OX=10090 GN=Pc PE=1 SV=1	Pc	37	31	337	31	129.6	3.04029e+07	3.11237e+07	3.34667e+07	2.74971e+07	3.22607e+07	2.81298e+07	4.11838e+07	3.22003e+07	7.6276e+07	2.3837e+07	3.07489e+07	2.37429e+07	2.50349e+07	2.55574e+07	1.26724e+08	2.6329e+07	2.65838e+07	4.59585e+07
P62858	40S ribosomal protein S28 OS=Mus musculus OX=10090 GN=Rps28 PE=1 SV=1	Rps28	46	3	55	3	7.8	3.80986e+06	3.81064e+06	3.31126e+06	4.18327e+06	4.51592e+06	2.95828e+06	3.71306e+06	3.89684e+06	4.76937e+06	4.0783e+06	4.17131e+06	5.57893e+06	4.5208e+06	5.438e+06	7.14173e+06	5.66748e+06	5.02358e+06	4.86137e+06
P97351	40S ribosomal protein S3a OS=Mus musculus OX=10090 GN=Rps3a PE=1 SV=3	Rps3a	47	13	212	13	29.9	3.4975e+07	4.06192e+07	3.30105e+07	4.21458e+07	3.2176e+07	4.16709e+07	4.50348e+07	4.58928e+07	5.54158e+07	3.95749e+07	4.53715e+07	4.22333e+07	4.25079e+07	4.89201e+07	6.11822e+07	4.41153e+07	4.11944e+07	4.50779e+07
P11031	Activated RNA polymerase II transcriptional coactivator p15 OS=Mus musculus OX=10090 GN=Sub1 PE=1 SV=3	Sub1	27	3	10	3	14.4	1.93887e+06		618614	369993	3.03835e+06	2.01435e+06	338742	184767	887179	1.81921e+06	1.77197e+06	159537	223576	1.76653e+06	2.50416e+06	907024	1.61071e+06	1.32336e+06
Q921F2	TAR DNA-binding protein 43 OS=Mus musculus OX=10090 GN=Tardbp PE=1 SV=1	Tardbp	8	4	59	4	44.5	2.99021e+06	2.11878e+06	1.41587e+06	2.58446e+06	2.68593e+06	2.51779e+06	2.39397e+06	1.1707e+06	4.86016e+06	3.74257e+06	2.72475e+06	1.49723e+06	3.30924e+06	2.62784e+06	3.81273e+06	1.32975e+06	1.45515e+06	3.45095e+06
P32921	Tryptophan--tRNA ligase, cytoplasmic OS=Mus musculus OX=10090 GN=Wars1 PE=1 SV=2	Wars1	18	7	55	7	54.3	7.47007e+06	6.49286e+06	3.14415e+07	7.45077e+06	1.21516e+07	6.92427e+06	2.42549e+07	5.44681e+06	7.08696e+06	7.1808e+06	6.42772e+06	6.5914e+06	5.09426e+06	3.31455e+06	5.32916e+06	5.70412e+06	7.47743e+06	6.73381e+06
O55042	Alpha-synuclein OS=Mus musculus OX=10090 GN=Snca PE=1 SV=2	Snca	21	2	4	2	14.5	163259	262150	821723			22001.8	544357	33933.4	157790	18524.5	13943.5	32755.1	6499.1	29906.1	162829	15694.5	183551	40799.2
P40142	Transketolase OS=Mus musculus OX=10090 GN=Tkt PE=1 SV=1	Tkt	48	25	241	25	67.6	2.29045e+07	1.71822e+07	1.58539e+07	2.09781e+07	2.2955e+07	1.48139e+07	1.59044e+07	1.74951e+07	7.92365e+07	1.62607e+07	1.78055e+07	2.58885e+07	1.40468e+07	2.15014e+07	1.44278e+08	1.31969e+07	1.52644e+07	4.05859e+07
Q91XB0	Three-prime repair exonuclease 1 OS=Mus musculus OX=10090 GN=Trex1 PE=1 SV=2	Trex1	3	1	2	1	33.7	336373	238790	252197	128206	153417		66751.9	71148	111130	45135.7	114827	58196	71073.6	124856	193973		115646	237900
P70362	Ubiquitin recognition factor in ER-associated degradation protein 1 OS=Mus musculus OX=10090 GN=Ufd1 PE=1 SV=2	Ufd1	14	4	26	4	34.5	1.9266e+06	1.74187e+06	1.74688e+06	1.97459e+06	2.29687e+06	1.15809e+06	1.39212e+06	1.13921e+06	1.25281e+06	1.18326e+06	990209	1.03301e+06	1.06589e+06	1.27974e+06		1.35017e+06	1.92658e+06	1.40351e+06
O35448	Lysosomal thioesterase PPT2 OS=Mus musculus OX=10090 GN=Ppt2 PE=1 SV=1	Ppt2	5	1	8	1	34.3	242127	146507		185849	198645		142704	88748.2	267601	153124	155706	343574		114343	188598	222655	263701	265919
Q14C51	Pentatricopeptide repeat domain-containing protein 3, mitochondrial OS=Mus musculus OX=10090 GN=Ptcd3 PE=1 SV=2	Ptcd3	16	8	52	8	77.7	3.0369e+07	2.11734e+07	1.6285e+07	1.86767e+07	1.55015e+07	1.04511e+07	2.42468e+07	2.15699e+07	2.30384e+07	2.3381e+07	1.60945e+07	1.47984e+07	1.0466e+07	1.85257e+07	1.65058e+07	1.93515e+07	1.19614e+07	8.38457e+06
Q8C2Q3	RNA-binding protein 14 OS=Mus musculus OX=10090 GN=Rbm14 PE=1 SV=1	Rbm14	7	3	8	3	69.4	482863	706764	694381	297120	377371			396700	4.34608e+06	859613		159445	536802	418190	1.08822e+06	4.83965e+06	583841	1.2167e+06
Q8VE37	Regulator of chromosome condensation OS=Mus musculus OX=10090 GN=Rcc1 PE=1 SV=1	Rcc1	6	2	12	2	44.9	1.06348e+06	392218	305188	129813	553935	874724	1.05681e+06	637822	1.69695e+06	605055	948146	1.13077e+06	674421	1.27919e+06	2.27646e+06	1.20415e+06	1.23513e+06	611009
Q99N94	39S ribosomal protein L9, mitochondrial OS=Mus musculus OX=10090 GN=Mrpl9 PE=1 SV=2	Mrpl9	7	2	24	2	30.2	1.05004e+06	280538	386182	800773	1.0493e+06	545608	705364	278667	1.5384e+06	767312	721026	1.74399e+06	960249	199291	1.00439e+06	1.17395e+06	1.00303e+06	785394
P60122	RuvB-like 1 OS=Mus musculus OX=10090 GN=Ruvbl1 PE=1 SV=1	Ruvbl1	15	4	34	4	50.2	1.66555e+06	6.46902e+08	1.81189e+06	1.78675e+06	2.36586e+06	1.08665e+06	6.06366e+08	1.92554e+06	837699	1.50879e+06	1.3352e+06	2.36042e+06	1.12929e+06	2.29482e+06	1.56258e+06	1.52211e+06	1.5519e+06	2.63071e+06
Q6NZC7	SEC23-interacting protein OS=Mus musculus OX=10090 GN=Sec23ip PE=1 SV=2	Sec23ip	5	3	22	3	110.7	676510	684362	488632	685630	758298	521849	516221	554828	670871	519322	563551	507528	541290	595856	733637	647897	522318	577289
Q61753	D-3-phosphoglycerate dehydrogenase OS=Mus musculus OX=10090 GN=Phgdh PE=1 SV=3	Phgdh	16	6	8	6	56.5	762054	756553	808792	1.45892e+06	1.2421e+06	782719	1.49525e+06	944813	2.68889e+06	1.22838e+06	628924	1.59029e+06	751370	1.01456e+06	5.5794e+06	793589	1.01815e+06	689295
Q60949	TBC1 domain family member 1 OS=Mus musculus OX=10090 GN=Tbc1d1 PE=1 SV=3	Tbc1d1	9	8	35	8	141.9	976205	1.20242e+06	295612	785094	583357	405982	590130	848047	711754	740371	296585	1.79105e+06	831038	601265	667905	410232	612956	1.0128e+06
P21981	Protein-glutamine gamma-glutamyltransferase 2 OS=Mus musculus OX=10090 GN=Tgm2 PE=1 SV=4	Tgm2	32	17	261	17	77	2.36053e+07	2.7904e+07	1.95191e+07	2.55239e+07	2.38257e+07	3.222e+07	3.45713e+07	2.8468e+07	3.05089e+07	3.82861e+07	2.34189e+07	3.92835e+07	2.42502e+07	3.16255e+07	2.94559e+07	3.6109e+07	2.77555e+07	2.98643e+07
Q5SSK3	Transcription elongation factor, mitochondrial OS=Mus musculus OX=10090 GN=Tefm PE=1 SV=1	Tefm	12	3	19	3	41.8	6.87038e+06	6.09917e+06	4.06316e+06	3.68886e+06	3.93914e+06	3.26237e+06	7.27279e+06	4.17939e+06	5.21467e+06	3.76613e+06	5.28937e+06	5.00059e+06	1.87961e+06	2.49836e+06	3.98983e+06	3.378e+06	3.71097e+06	4.12656e+06
Q8BFY9	Transportin-1 OS=Mus musculus OX=10090 GN=Tnpo1 PE=1 SV=2	Tnpo1	6	5	32	3	102.3	1.92406e+06	1.92825e+06	1.57807e+06	2.68431e+06	2.42458e+06	1.11013e+06	1.93981e+06	1.63571e+06	2.17169e+06	1.78083e+06	1.71363e+06	1.32964e+06	752964	893952	1.70489e+06	1.07552e+06	1.88367e+06	2.52983e+06
P36536	GTP-binding protein SAR1a OS=Mus musculus OX=10090 GN=Sar1a PE=1 SV=1	Sar1a	24	4	68	2	22.4	3.01837e+06	4.08319e+06	2.52425e+06	4.63256e+06	4.7462e+06	4.25173e+06	4.15401e+06	2.47269e+06	3.31254e+06	2.13316e+06	2.31601e+06	3.09087e+06	2.79132e+06	2.93255e+06	3.53961e+06	2.9062e+06	3.10266e+06	3.12255e+06
Q8R5A0	N-lysine methyltransferase SMYD2 OS=Mus musculus OX=10090 GN=Smyd2 PE=1 SV=1	Smyd2	25	7	57	7	49.5	8.24498e+06	1.02499e+07	1.01541e+07	1.12359e+07	9.57709e+06	1.26782e+07	8.93687e+06	9.75681e+06	6.74912e+06	9.90063e+06	8.91737e+06	7.8497e+06	8.59069e+06	1.13092e+07	8.89008e+06	1.01533e+07	7.10015e+06	8.1885e+06
P63166	Small ubiquitin-related modifier 1 OS=Mus musculus OX=10090 GN=Sumo1 PE=1 SV=1	Sumo1	12	1	3	1	11.6
Q921I1	Serotransferrin OS=Mus musculus OX=10090 GN=Tf PE=1 SV=1	Tf	66	48	896	47	76.7	3.59986e+08	3.31813e+08	4.96174e+08	3.30796e+08	4.0771e+08	2.47774e+08	3.34887e+08	3.93931e+08	6.36906e+08	3.59855e+08	4.04507e+08	3.16518e+08	2.5718e+08	2.70349e+08	7.74019e+08	3.66125e+08	3.99896e+08	3.7506e+08
Q8BXZ1	Protein disulfide-isomerase TMX3 OS=Mus musculus OX=10090 GN=Tmx3 PE=1 SV=2	Tmx3	11	5	51	5	51.8	2.24547e+06	2.13735e+06	1.64482e+06	2.12536e+06	2.43404e+06	1.90133e+06	2.08512e+06	2.22137e+06	3.38103e+06	2.46702e+06	2.7057e+06	2.96762e+06	2.17818e+06	2.19643e+06	2.73444e+06	2.23379e+06	2.51421e+06	2.52705e+06
Q9CPP6	NADH dehydrogenase [ubiquinone] 1 alpha subcomplex subunit 5 OS=Mus musculus OX=10090 GN=Ndufa5 PE=1 SV=3	Ndufa5	47	5	130	5	13.4	3.98534e+07	3.37525e+07	2.74369e+07	3.47756e+07	4.8137e+07	2.61798e+07	2.97775e+07	2.77744e+07	4.77514e+07	3.23973e+07	2.45781e+07	4.55292e+07	2.8076e+07	2.46896e+07	2.64631e+07	2.61756e+07	3.28355e+07	2.45283e+07
Q78XF5	Oligosaccharyltransferase complex subunit OSTC OS=Mus musculus OX=10090 GN=Ostc PE=1 SV=1	Ostc	8	1	2	1	16.8
Q8CI51	PDZ and LIM domain protein 5 OS=Mus musculus OX=10090 GN=Pdlim5 PE=1 SV=4	Pdlim5	23	10	267	10	63.3	1.47222e+08	1.54643e+08	1.28302e+08	1.8065e+08	1.90777e+08	1.54233e+08	1.50715e+08	1.42325e+08	1.50703e+08	1.7215e+08	1.40185e+08	1.42976e+08	1.55405e+08	1.79816e+08	1.23649e+08	1.51047e+08	1.65368e+08	1.33169e+08
Q7TSQ8	Pyruvate dehydrogenase phosphatase regulatory subunit, mitochondrial OS=Mus musculus OX=10090 GN=Pdpr PE=1 SV=1	Pdpr	30	21	280	21	99.2	3.40967e+07	2.25924e+07	1.44374e+07	2.39478e+07	2.52423e+07	2.36662e+07	2.04707e+07	2.11463e+07	2.83626e+07	2.40742e+07	1.9475e+07	2.67557e+07	2.49817e+07	2.02396e+07	2.10383e+07	2.19475e+07	2.60052e+07	2.35149e+07
Q60963	Platelet-activating factor acetylhydrolase OS=Mus musculus OX=10090 GN=Pla2g7 PE=1 SV=2	Pla2g7	2	1	2	1	49.2	292716		294171	233871	625873	367837	215390	224879		313912	225490	245909	256135	326436		269593	266002	241645
Q9EQI8	39S ribosomal protein L46, mitochondrial OS=Mus musculus OX=10090 GN=Mrpl46 PE=1 SV=1	Mrpl46	12	3	19	3	32.1	1.16236e+06	656562	479367	883206	1.53165e+06	826185	733950	769337	1.47941e+06	841420	767966	1.2393e+06	746304	416836	187552	160269	931353	632304
Q9DCV4	Regulator of microtubule dynamics protein 1 OS=Mus musculus OX=10090 GN=Rmdn1 PE=1 SV=2	Rmdn1	13	4	28	4	35	3.33599e+06	2.90097e+06	2.22404e+06	3.01774e+06	6.53116e+06	2.73016e+06	2.43428e+06	1.98416e+06	3.51465e+06	2.27322e+06	1.5054e+06	2.88127e+06	2.28877e+06	1.30646e+06	696181	1.53688e+06	3.31366e+06	2.46266e+06
P31725	Protein S100-A9 OS=Mus musculus OX=10090 GN=S100a9 PE=1 SV=3	S100a9	29	3	8	3	13	10524.5		21574.7	701396	30525.5	14381.1	624908	19642.4		1.06371e+06	89907.3	9161.57	940192	909854	1.59052e+06		55314.8	744575
Q9CSN1	SNW domain-containing protein 1 OS=Mus musculus OX=10090 GN=Snw1 PE=1 SV=3	Snw1	4	1	13	1	61.4	376710	305937	270364	425150	369713	337573	150335	241103	330230	305542	279656	303939	294945	276509	442432	149033	174505	172424
Q8BVU5	ADP-ribose pyrophosphatase, mitochondrial OS=Mus musculus OX=10090 GN=Nudt9 PE=1 SV=1	Nudt9	4	1	2	1	38.6	278025	115314				59271	59004	185315	412719	244802	162878	228895	55470.1	94295.2	171530	133207	144259	186892
Q61233	Plastin-2 OS=Mus musculus OX=10090 GN=Lcp1 PE=1 SV=4	Lcp1	39	20	129	17	70.1	4.88343e+07	5.88543e+07	5.71561e+07	5.64193e+07	5.73228e+07	3.44491e+07	4.40621e+07	4.07995e+07	4.82536e+07	5.0659e+07	4.26298e+07	3.42411e+07	3.65131e+07	4.85675e+07	1.06943e+08	5.16862e+07	3.6506e+07	7.7411e+07
Q9DCL9	Multifunctional protein ADE2 OS=Mus musculus OX=10090 GN=Paics PE=1 SV=4	Paics	34	12	152	12	47	1.83316e+07	1.54532e+07	1.63465e+07	1.81671e+07	2.08512e+07	1.76934e+07	1.23579e+07	1.68e+07	1.37141e+07	1.57933e+07	2.58823e+07	1.35868e+07	1.14721e+07	1.75811e+07	1.89717e+07	1.86596e+07	1.66215e+07	1.6901e+07
Q91VM5	RNA binding motif protein, X-linked-like-1 OS=Mus musculus OX=10090 GN=Rbmxl1 PE=2 SV=1	Rbmxl1	14	5	54	1	42.1	862919	802090	541069	910060	1.24222e+06	436367	561974	583873	468554	521102	536466	507152	481159	526988	858367	452080	503605	544625
Q8R3V5	Endophilin-B2 OS=Mus musculus OX=10090 GN=Sh3glb2 PE=1 SV=2	Sh3glb2	6	2	8	1	44.5	1.66913e+06	3.31091e+06	2.38927e+06	2.83959e+06	3.17373e+06	2.44375e+06	2.21101e+06	2.27208e+06	2.53017e+06	2.18326e+06	1.60496e+06	2.0452e+06	2.07224e+06	1.57542e+06	1.6458e+06	1.97926e+06	2.29883e+06	2.18514e+06
Q62407	Striated muscle-specific serine/threonine-protein kinase OS=Mus musculus OX=10090 GN=Speg PE=1 SV=2	Speg	31	72	975	72	354.1	1.34089e+08	1.27885e+08	1.34786e+08	1.53069e+08	1.57298e+08	1.60618e+08	1.15041e+08	1.32027e+08	1.14023e+08	1.33306e+08	1.22833e+08	1.17502e+08	1.4053e+08	1.33025e+08	1.17792e+08	1.06132e+08	1.4461e+08	1.60027e+08
Q9R112	Sulfide:quinone oxidoreductase, mitochondrial OS=Mus musculus OX=10090 GN=Sqor PE=1 SV=3	Sqor	44	13	73	13	50.3	5.3475e+06	1.17447e+07	4.90819e+06	8.74432e+06	9.64412e+06	9.41529e+06	8.8579e+06	6.45754e+06	7.00684e+06	4.70345e+06	3.91489e+06	5.53639e+06	4.86423e+06	4.15474e+06	7.06872e+06	4.39304e+06	5.0114e+06	4.78339e+06
Q9CY50	Translocon-associated protein subunit alpha OS=Mus musculus OX=10090 GN=Ssr1 PE=1 SV=1	Ssr1	8	2	10	2	32	3.41171e+06	3.51661e+06	3.61555e+06	3.00515e+06	4.34453e+06	1.81478e+06	2.06399e+06	2.7923e+06	5.24728e+06	3.12441e+06	3.21037e+06	3.71805e+06	2.42711e+06	2.92668e+06	4.07095e+06	3.73496e+06	305688	431733
Q6ZWR6	Nesprin-1 OS=Mus musculus OX=10090 GN=Syne1 PE=1 SV=2	Syne1	0	2	30	2	1009.3	3.52713e+07	3.65625e+07	4.60383e+07	3.25662e+07	2.31563e+07	2.71594e+07	2.60822e+07	3.08199e+07	2.29192e+07	3.25427e+07	3.71049e+07	2.85872e+07	3.42537e+07	1.84277e+07	1.36618e+07	1.92689e+07	3.3585e+07	2.3199e+07
Q9JKB1	Ubiquitin carboxyl-terminal hydrolase isozyme L3 OS=Mus musculus OX=10090 GN=Uchl3 PE=1 SV=2	Uchl3	32	5	76	5	26.1	4.2625e+06	4.14932e+06	5.09813e+06	3.45779e+06	4.33948e+06	4.27426e+06	4.6206e+06	4.29523e+06	4.58242e+06	4.23423e+06	4.57757e+06	4.22297e+06	5.01324e+06	3.34472e+06	4.69636e+06	3.38563e+06	4.35632e+06	2.95503e+06
P20152	Vimentin OS=Mus musculus OX=10090 GN=Vim PE=1 SV=3	Vim	71	33	577	25	53.7	2.45478e+08	1.84561e+08	9.23471e+07	1.9593e+08	3.02591e+08	1.13347e+08	1.70289e+08	2.04426e+08	3.73141e+08	1.93514e+08	1.75293e+08	1.90732e+08	1.5632e+08	2.47264e+08	4.45776e+08	1.92786e+08	1.94856e+08	2.15481e+08
Q91YT7	YTH domain-containing family protein 2 OS=Mus musculus OX=10090 GN=Ythdf2 PE=1 SV=1	Ythdf2	2	1	6	1	62.2	132655	87877.9	95115.7	128335	141040	104524	135382	114518		174864	162264	180583	198449	223288		174924	115217	161940
Q8K1N1	Calcium-independent phospholipase A2-gamma OS=Mus musculus OX=10090 GN=Pnpla8 PE=1 SV=1	Pnpla8	2	1	6	1	87.3		165834		187020	300048	156788	151082	102267			131154	138165	146349	124182	172970		287462	245316
P14685	26S proteasome non-ATPase regulatory subunit 3 OS=Mus musculus OX=10090 GN=Psmd3 PE=1 SV=3	Psmd3	36	17	197	17	60.7	2.2835e+07	2.14326e+07	1.96325e+07	2.25955e+07	2.22019e+07	2.30554e+07	2.33989e+07	2.2813e+07	2.53501e+07	2.62079e+07	2.19798e+07	2.53419e+07	2.02929e+07	2.21881e+07	2.24495e+07	2.52166e+07	2.69791e+07	2.57278e+07
Q9ET26	E3 ubiquitin-protein ligase RNF114 OS=Mus musculus OX=10090 GN=Rnf114 PE=1 SV=2	Rnf114	8	1	18	1	25.7	236305	237041	257133	269792	368414	127049	201795	146003	160802	195561	136316	189880	184419	183978	213997	203842	240497	162985
O70548	Telethonin OS=Mus musculus OX=10090 GN=Tcap PE=1 SV=1	Tcap	53	7	108	7	19.1	3.46477e+07	2.23206e+07	1.93273e+07	2.819e+07	3.17579e+07	1.55602e+07	1.77631e+07	1.66315e+07	3.21963e+07	2.22129e+07	1.88306e+07	2.97942e+07	2.5212e+07	1.90973e+07	1.86322e+07	2.41819e+07	2.82001e+07	2.22566e+07
Q9CYG7	Mitochondrial import receptor subunit TOM34 OS=Mus musculus OX=10090 GN=Tomm34 PE=1 SV=1	Tomm34	17	4	26	4	34.3	1.85549e+06	2.97425e+06	2.88938e+06	2.92078e+06	3.3947e+06	2.73054e+06	2.55501e+06	2.03964e+06	3.26403e+06	2.88621e+06	2.32767e+06	2.99757e+06	2.81965e+06	2.2935e+06	3.03997e+06	3.25395e+06	3.40138e+06	3.27516e+06
E9Q735	Ubiquitin conjugation factor E4 A OS=Mus musculus OX=10090 GN=Ube4a PE=1 SV=1	Ube4a	3	1	1	1	118.1		329919			633850						328918	491232
O70475	UDP-glucose 6-dehydrogenase OS=Mus musculus OX=10090 GN=Ugdh PE=1 SV=1	Ugdh	7	2	13	2	54.8	277071	90458.1	210866	92694.6	61278.5		784899	701308	918589	256993	128213	225263			516074	274748
O08810	116 kDa U5 small nuclear ribonucleoprotein component OS=Mus musculus OX=10090 GN=Eftud2 PE=1 SV=1	Eftud2	11	7	77	6	109.3	1.19694e+06	1.13017e+06	1.15034e+06	1.4276e+06	1.37647e+06	1.25966e+06	1.47938e+06	1.68032e+06	1.56375e+06	1.21172e+06	1.2633e+06	1.60548e+06	1.07216e+06	1.69573e+06	3.10675e+06	1.8922e+06	1.53622e+06	1.76416e+06
P50518	V-type proton ATPase subunit E 1 OS=Mus musculus OX=10090 GN=Atp6v1e1 PE=1 SV=2	Atp6v1e1	15	3	13	3	26.1	641893	314979	351873	2.40128e+06	2.70729e+06		510026	469850	2.33084e+06		1.45853e+06		477936	959024	2.86289e+06	953952	486612	520284
P46938	Transcriptional coactivator YAP1 OS=Mus musculus OX=10090 GN=Yap1 PE=1 SV=2	Yap1	3	1	8	1	52.4	181534		70071.2			88389.7	96130.7	106222	111596	172376	133082	86190.6	118106	145157	397569	261176	195219	171661
Q62084	Protein phosphatase 1 regulatory subunit 14B OS=Mus musculus OX=10090 GN=Ppp1r14b PE=1 SV=2	Ppp1r14b	30	2	14	2	15.9	208000	183360	238215	171249				188744	136862		275167	250034	95193.4	192704	5.42988e+06	383851	211041
Q9Z2U0	Proteasome subunit alpha type-7 OS=Mus musculus OX=10090 GN=Psma7 PE=1 SV=1	Psma7	32	7	134	7	27.8	1.29409e+07	1.09705e+07	1.62336e+07	1.00999e+07	8.43063e+06	1.32011e+07	1.46102e+07	1.21384e+07	1.53445e+07	1.09914e+07	1.25678e+07	1.12531e+07	9.72956e+06	1.4353e+07	1.8524e+07	1.53874e+07	1.54308e+07	1.60761e+07
P04925	Major prion protein OS=Mus musculus OX=10090 GN=Prnp PE=1 SV=2	Prnp	13	3	21	3	28	670309	573199	500952	427220	705414	687883	653149	451837	1.14813e+06	187923	1.27592e+06	461077	1.18834e+06	837642	1.02154e+06	938327	731772	756187
O09061	Proteasome subunit beta type-1 OS=Mus musculus OX=10090 GN=Psmb1 PE=1 SV=1	Psmb1	32	6	75	6	26.4	6.5749e+06	6.35668e+06	6.09945e+06	6.16116e+06	6.20608e+06	6.16047e+06	6.46672e+06	6.25682e+06	6.96522e+06	7.35951e+06	7.12646e+06	7.40641e+06	6.70091e+06	9.85793e+06	9.39147e+06	8.92387e+06	9.15436e+06	1.22978e+07
Q6NVE9	Protein phosphatase PTC7 homolog OS=Mus musculus OX=10090 GN=Pptc7 PE=1 SV=1	Pptc7	8	2	9	2	33	164497	128444	78651.2	158337	144421	95598.6	83274.1		73922.3	122645	113996	81594.1	91564	91624			63091.1
Q9CY27	Very-long-chain enoyl-CoA reductase OS=Mus musculus OX=10090 GN=Tecr PE=1 SV=1	Tecr	44	12	155	12	36.1	3.65701e+07	4.31191e+07	3.59316e+07	3.85593e+07	3.36163e+07	4.75111e+07	4.31937e+07	5.07536e+07	4.71834e+07	5.12362e+07	4.55452e+07	4.57996e+07	4.04917e+07	4.51004e+07	4.81169e+07	4.19682e+07	4.52192e+07	5.48414e+07
P26039	Talin-1 OS=Mus musculus OX=10090 GN=Tln1 PE=1 SV=2	Tln1	30	58	520	48	269.7	5.5348e+07	5.75902e+07	4.42843e+07	6.11986e+07	7.64511e+07	5.32928e+07	7.88254e+07	5.45347e+07	6.70993e+07	6.66854e+07	6.5734e+07	7.36187e+07	6.42969e+07	6.79198e+07	7.62468e+07	6.10674e+07	5.15226e+07	6.78112e+07
Q8BWT1	3-ketoacyl-CoA thiolase, mitochondrial OS=Mus musculus OX=10090 GN=Acaa2 PE=1 SV=3	Acaa2	73	19	409	19	41.8	4.49584e+08	4.80207e+08	4.68364e+08	5.25741e+08	4.95322e+08	3.61444e+08	4.0492e+08	3.30761e+08	3.62147e+08	3.68616e+08	3.54466e+08	3.23648e+08	3.65642e+08	2.7939e+08	2.8142e+08	2.35763e+08	3.75739e+08	4.94156e+08
Q9ES56	Trafficking protein particle complex subunit 4 OS=Mus musculus OX=10090 GN=Trappc4 PE=1 SV=1	Trappc4	9	2	3	2	24.4	386351	438586	259321	493135	513983	159277	214407	243860	258184	625211	261011		294218	249434	359270	188623
Q9CQU0	Thioredoxin domain-containing protein 12 OS=Mus musculus OX=10090 GN=Txndc12 PE=1 SV=1	Txndc12	5	1	12	1	19	935887			894329	630895	466827	430649		1.39093e+06	730894	722991	788453	532768	784121	1.16573e+06	516186	809392	547078
Q02053	Ubiquitin-like modifier-activating enzyme 1 OS=Mus musculus OX=10090 GN=Uba1 PE=1 SV=1	Uba1	42	30	523	30	117.7	6.31803e+07	6.55708e+07	6.2457e+07	7.18331e+07	7.82363e+07	5.94498e+07	5.94134e+07	6.36659e+07	6.74667e+07	6.59962e+07	6.39225e+07	6.47659e+07	6.52328e+07	6.41593e+07	6.23591e+07	5.83048e+07	6.06491e+07	6.59346e+07
Q9CR09	Ubiquitin-fold modifier-conjugating enzyme 1 OS=Mus musculus OX=10090 GN=Ufc1 PE=1 SV=1	Ufc1	22	4	50	4	19.5	4.8199e+06	3.92939e+06	3.60815e+06	3.58524e+06	3.58644e+06	4.63142e+06	4.2033e+06	5.26529e+06	5.83971e+06	5.2702e+06	5.60701e+06	5.20434e+06	5.43905e+06	5.67885e+06	5.09095e+06	4.50247e+06	4.14572e+06	4.99818e+06
Q8JZZ0	UDP-glucuronosyltransferase 3A2 OS=Mus musculus OX=10090 GN=Ugt3a2 PE=1 SV=2	Ugt3a2	3	1	1	1	59.6
Q8R121	Protein Z-dependent protease inhibitor OS=Mus musculus OX=10090 GN=Serpina10 PE=1 SV=1	Serpina10	2	1	15	1	51.8	147556	200757	504811		695498		470156		218925	287743	214044	239447		204203	437261	247955	211710	239023
P80315	T-complex protein 1 subunit delta OS=Mus musculus OX=10090 GN=Cct4 PE=1 SV=3	Cct4	25	14	193	14	58	3.5838e+07	4.22501e+07	4.59242e+07	4.36495e+07	4.78153e+07	4.04099e+07	3.8007e+07	4.29286e+07	4.26971e+07	3.86657e+07	4.22055e+07	3.68575e+07	3.64759e+07	3.73615e+07	3.68188e+07	3.21508e+07	3.63451e+07	3.99371e+07
Q9JJL8	Serine--tRNA ligase, mitochondrial OS=Mus musculus OX=10090 GN=Sars2 PE=1 SV=2	Sars2	12	4	25	4	58.3	1.34615e+07	1.48711e+07	1.25766e+07	1.40109e+07	1.52217e+07	1.44232e+07	1.16751e+07	1.15811e+07	1.11534e+07	9.99355e+06	1.01392e+07	1.14242e+07	1.04866e+07	9.3256e+06	8.42111e+06	6.92998e+06	1.06332e+07	1.53348e+07
Q9CR76	Transmembrane protein 186 OS=Mus musculus OX=10090 GN=Tmem186 PE=1 SV=2	Tmem186	7	2	3	2	24.6	209454	142324	121608	239407	332377	33710.8	195617	12634.4	371728	243404	59757.8	164553	114681	8363.23	82794.2	96438.4	192654	150378
Q3TMP8	Trimeric intracellular cation channel type A OS=Mus musculus OX=10090 GN=Tmem38a PE=1 SV=2	Tmem38a	35	9	271	9	33.3	1.07895e+08	1.07726e+08	9.03348e+07	1.47207e+08	1.27392e+08	1.52891e+08	1.31009e+08	1.31962e+08	1.86668e+08	1.38949e+08	1.57935e+08	1.19025e+08	1.2493e+08	1.27515e+08	1.92421e+08	1.39172e+08	1.58735e+08	1.4964e+08
P60605	Ubiquitin-conjugating enzyme E2 G2 OS=Mus musculus OX=10090 GN=Ube2g2 PE=1 SV=1	Ube2g2	13	1	19	1	18.6	966078	904970	1.82841e+06	1.52803e+06	1.02514e+06	1.0496e+06	1.24035e+06	721929	1.03233e+06	1.71374e+06	613113	1.01711e+06	841828	739200	500155	587500	953109	935090
P58064	28S ribosomal protein S6, mitochondrial OS=Mus musculus OX=10090 GN=Mrps6 PE=1 SV=3	Mrps6	13	2	10	2	14.3	1.75487e+06	1.10829e+06	353301	976539	1.24065e+06	526775	1.65813e+06	1.36465e+06	1.63673e+06	523368	1.40906e+06	1.06085e+06	281855	1.12981e+06	2.9948e+06	1.36391e+06	1.72575e+06	473332
Q9CW03	Structural maintenance of chromosomes protein 3 OS=Mus musculus OX=10090 GN=Smc3 PE=1 SV=2	Smc3	2	2	2	2	141.5	2.30591e+07	3.48975e+07	2.98572e+07	4.03634e+07	2.77585e+07	7.4912e+07	60695644	5.26178e+07	3.43568e+07	3.98509e+07	3.39351e+07	6.53861e+07	7.51003e+07	6.01542e+07	5.86993e+07	6.29833e+07	4.57938e+07	3.73851e+07
O09164	Extracellular superoxide dismutase [Cu-Zn] OS=Mus musculus OX=10090 GN=Sod3 PE=1 SV=1	Sod3	29	3	14	3	27.4	1.25809e+06	1.59727e+06	1.76489e+06	1.23615e+06	1.14469e+06	1.21373e+06	958951	1.09175e+06	1.64608e+06	1.07791e+06	617680	1.12217e+06	553350	811476	1.22818e+06	894102	1.58476e+06	1.29544e+06
Q9ER00	Syntaxin-12 OS=Mus musculus OX=10090 GN=Stx12 PE=1 SV=1	Stx12	12	3	18	3	31.2	969923	736573	811106	1.04325e+06	1.44368e+06	532356	842959	776239	1.073e+06	874638	965749	871224	740391	960496	1.4299e+06	1.10459e+06	1.14121e+06	861063
Q8BIJ6	Isoleucine--tRNA ligase, mitochondrial OS=Mus musculus OX=10090 GN=Iars2 PE=1 SV=1	Iars2	18	14	167	14	112.7	1.64868e+07	1.28548e+07	8.64248e+06	1.45706e+07	1.62632e+07	1.10538e+07	1.21957e+07	1.106e+07	1.33234e+07	1.43401e+07	9.68215e+06	1.41659e+07	1.24882e+07	1.23007e+07	1.50819e+07	1.46027e+07	1.32958e+07	1.26618e+07
P80316	T-complex protein 1 subunit epsilon OS=Mus musculus OX=10090 GN=Cct5 PE=1 SV=1	Cct5	48	19	230	19	59.6	2.24897e+07	2.57508e+07	2.61969e+07	2.4964e+07	2.65223e+07	2.39587e+07	2.30389e+07	2.60874e+07	2.39912e+07	2.59544e+07	2.81332e+07	2.02738e+07	2.44873e+07	3.36664e+07	2.91894e+07	3.00793e+07	3.01091e+07	3.0056e+07
Q6NXN1	SUZ domain-containing protein 1 OS=Mus musculus OX=10090 GN=Szrd1 PE=1 SV=1	Szrd1	5	1	17	1	17	1.19784e+06	972235	711297	1.08267e+06	2.00204e+06	786939	847971	804092	3.45584e+06	966948	619581	790024	489564	685201	1.91742e+06	509942	1.0925e+06	707895
P40630	Transcription factor A, mitochondrial OS=Mus musculus OX=10090 GN=Tfam PE=1 SV=2	Tfam	16	5	42	5	28	3.01159e+06	1.78351e+06	2.43071e+06	2.80974e+06	2.30894e+06	4.87371e+06	4.3636e+06	1.50649e+06	2.90112e+06	2.26285e+06	1.74483e+06	3.10244e+06	2.32893e+06	2.9548e+06	3.91933e+06	2.41659e+06	2.16988e+06	2.13022e+06
A2ASS6	Titin OS=Mus musculus OX=10090 GN=Ttn PE=1 SV=1	Ttn	63	1867	56951	1866	3904.1	4.55512e+10	4.86917e+10	4.6911e+10	4.65154e+10	4.49088e+10	5.24576e+10	4.90783e+10	5.18252e+10	4.31412e+10	4.76441e+10	5.09885e+10	4.76888e+10	5.12831e+10	5.36346e+10	4.65166e+10	4.95707e+10	5.10403e+10	5.29475e+10
P62996	Transformer-2 protein homolog beta OS=Mus musculus OX=10090 GN=Tra2b PE=1 SV=1	Tra2b	9	3	42	3	33.6	1.39623e+06	1.56742e+06	1.66249e+06	1.16386e+06	3.36702e+06	1.21073e+06	1.40784e+06	1.61333e+06	2.39286e+06	1.82368e+06	1.21919e+06	1.677e+06	1.15923e+06	617455	3.70158e+06	1.99583e+06	1.4118e+06	1.89197e+06
Q9EP64	Tenomodulin OS=Mus musculus OX=10090 GN=Tnmd PE=2 SV=1	Tnmd	12	4	52	4	37	9.5543e+06	1.02577e+07	5.56727e+06	8.79626e+06	5.60479e+06	5.19365e+06	7.49352e+06	1.07626e+06	3.76795e+06	6.49062e+06	1.83976e+06	9.98042e+06	2.44491e+06	1.9307e+06	2.11532e+06	3.34725e+06	1.57447e+06	3.29748e+06
Q8CGY6	Protein unc-45 homolog B OS=Mus musculus OX=10090 GN=Unc45b PE=1 SV=1	Unc45b	44	36	449	36	103.6	9.87795e+07	9.43895e+07	7.41479e+07	8.67155e+07	9.61066e+07	9.70727e+07	9.04853e+07	9.18679e+07	1.15139e+08	1.15973e+08	1.06101e+08	1.05032e+08	1.20525e+08	1.29981e+08	1.15534e+08	1.29003e+08	1.05657e+08	1.19875e+08
A2ARP1	Inositol hexakisphosphate and diphosphoinositol-pentakisphosphate kinase 1 OS=Mus musculus OX=10090 GN=Ppip5k1 PE=1 SV=1	Ppip5k1	2	2	3	2	159.8	244544	228654	43498.9	400795	404906	65291.5	207626	195865	354102	240125	42294.6	142059	206453	74959.1	72671.6	111972	255243	126335
Q8VE97	Serine/arginine-rich splicing factor 4 OS=Mus musculus OX=10090 GN=Srsf4 PE=2 SV=1	Srsf4	2	1	5	1	55.9	548075	372219	544403	882433	658177	600080	748442	339257	655643	779077	465997	465705	603950	378981	627673	419633		522423
P52840	Sulfotransferase 1A1 OS=Mus musculus OX=10090 GN=Sult1a1 PE=1 SV=1	Sult1a1	30	6	44	6	34	1.35339e+06	1.57401e+06	2.19279e+06	1.76635e+06	2.27333e+06	1.33508e+06	3.71869e+06	1.84777e+06	2.09159e+06	1.84652e+06	841159	2.33954e+06	1.14789e+06	1.04761e+06	3.04218e+06	2.85322e+06	1.34523e+06	3.05202e+06
Q8BMJ2	Leucine--tRNA ligase, cytoplasmic OS=Mus musculus OX=10090 GN=Lars1 PE=1 SV=2	Lars1	14	15	120	15	134.1	6.74636e+06	7.45168e+06	7.34456e+06	8.30786e+06	1.07879e+07	6.27118e+06	6.83279e+06	5.79518e+06	5.66476e+06	5.78655e+06	6.73955e+06	4.18459e+06	4.97399e+06	6.58375e+06	5.69497e+06	7.29407e+06	5.37288e+06	7.60604e+06
Q9EPM5	Syncoilin OS=Mus musculus OX=10090 GN=Sync PE=1 SV=1	Sync	13	4	28	4	53.6	3.56254e+06	4.1529e+06	3.68606e+06	4.71202e+06	4.47197e+06	2.95869e+06	2.63365e+06	3.22107e+06	4.50364e+06	3.16267e+06	2.64138e+06	3.04662e+06	2.1173e+06	2.94925e+06	2.14057e+06	1.61594e+06	2.59994e+06	2.90242e+06
Q921L3	Calcium load-activated calcium channel OS=Mus musculus OX=10090 GN=Tmco1 PE=1 SV=1	Tmco1	9	2	32	2	21.2	919619	2.24835e+06	495683	612438	2.44471e+06	2.68403e+06	1.98818e+06	982431	3.11594e+06	668781	2.00592e+06	2.53672e+06	1.98387e+06	2.04291e+06	3.20459e+06	1.37207e+06	3.01261e+06	3.34255e+06
Q9CQV1	Mitochondrial import inner membrane translocase subunit TIM16 OS=Mus musculus OX=10090 GN=Pam16 PE=1 SV=1	Pam16	28	3	18	3	13.8	759905	413324	144176	650353	903320	1.09417e+06	1.05633e+06	671608	979789	735807	591657	957395	839239	1.01748e+06	859455	566202	1.01266e+06	824900
Q923D5	WW domain-binding protein 11 OS=Mus musculus OX=10090 GN=Wbp11 PE=1 SV=2	Wbp11	3	1	3	1	69.8
P13412	Troponin I, fast skeletal muscle OS=Mus musculus OX=10090 GN=Tnni2 PE=2 SV=2	Tnni2	60	18	3345	18	21.3	2.96103e+09	3.46896e+09	3.30702e+09	3.32846e+09	2.61935e+09	3.07983e+09	2.61941e+09	3.03113e+09	2.75551e+09	2.85759e+09	3.23549e+09	2.816e+09	3.16325e+09	3.11814e+09	2.98575e+09	2.76957e+09	3.40619e+09	3.10016e+09
P21107	Tropomyosin alpha-3 chain OS=Mus musculus OX=10090 GN=Tpm3 PE=1 SV=3	Tpm3	70	30	1456	10	33	1.08591e+07	1.11729e+07	5.70481e+06	8.46026e+07	4.36665e+07	1.7158e+07	3.44293e+07	3.39696e+07	1.20524e+08	9.20156e+07	8.07914e+06	1.4454e+07	2.01731e+07	1.23276e+07	1.41981e+07	5.84256e+07	2.95102e+07	2.17452e+07
Q8C0L0	Thioredoxin-related transmembrane protein 4 OS=Mus musculus OX=10090 GN=Tmx4 PE=1 SV=2	Tmx4	14	3	26	3	37.1	2.59726e+06	1.9508e+06	1.43718e+06	2.43595e+06	1.42391e+06	1.50847e+06	1.20843e+06	1.53256e+06	1.82935e+06	1.98436e+06	1.87915e+06	1.44835e+06	1.33243e+06	1.52914e+06	1.56596e+06	1.54565e+06	2.12622e+06	1.77912e+06
Q8BG60	Thioredoxin-interacting protein OS=Mus musculus OX=10090 GN=Txnip PE=1 SV=1	Txnip	6	1	5	1	44.3	101723			159261								33433.7		39355.2
Q8VDI7	Ubiquitin-associated domain-containing protein 1 OS=Mus musculus OX=10090 GN=Ubac1 PE=1 SV=2	Ubac1	17	6	77	6	45.5	8.7892e+06	8.23893e+06	8.61072e+06	6.80989e+06	1.04961e+07	7.07394e+06	7.98323e+06	8.97833e+06	1.66264e+07	7.33754e+06	7.9924e+06	8.40999e+06	7.27275e+06	7.48209e+06	1.89139e+07	1.0299e+07	9.20398e+06	9.95357e+06
E9PZQ0	Ryanodine receptor 1 OS=Mus musculus OX=10090 GN=Ryr1 PE=1 SV=1	Ryr1	49	193	4151	193	564.7	1.45157e+09	1.12118e+09	9.66563e+08	1.56215e+09	1.4315e+09	1.08551e+09	9.58742e+08	1.03101e+09	1.45209e+09	1.35475e+09	1.41223e+09	1.4384e+09	1.32992e+09	1.40056e+09	1.24813e+09	1.43121e+09	1.44897e+09	1.54989e+09
Q9JK48	Endophilin-B1 OS=Mus musculus OX=10090 GN=Sh3glb1 PE=1 SV=1	Sh3glb1	18	6	64	5	40.8	2.40737e+07	2.87889e+07	2.0855e+07	3.0466e+07	4.63688e+07	4.77416e+07	4.27731e+07	4.62825e+07	4.10276e+07	4.389e+07	4.46592e+07	4.13557e+07	4.04582e+07	3.96083e+07	3.32447e+07	3.66809e+07	3.92358e+07	4.493e+07
Q91WP6	Serine protease inhibitor A3N OS=Mus musculus OX=10090 GN=Serpina3n PE=1 SV=1	Serpina3n	6	2	24	1	46.7	706129		761587	497928	1.55317e+06		871416	288059	1.28901e+06	876755	526441	429931		443180	1.23198e+06	576572	683978	730391
Q99L88	Beta-1-syntrophin OS=Mus musculus OX=10090 GN=Sntb1 PE=1 SV=4	Sntb1	11	5	38	4	58	320853	1.20765e+06	955843	922670	135844	713033	651656	222034	147607	661980		113745	201316	1.6247e+06	799524	555971	228539	716877
P11983	T-complex protein 1 subunit alpha OS=Mus musculus OX=10090 GN=Tcp1 PE=1 SV=3	Tcp1	30	14	140	14	60.4	1.22055e+07	1.31984e+07	1.26918e+07	1.26073e+07	1.60006e+07	9.48592e+06	1.46682e+07	1.62809e+07	1.37743e+07	1.35422e+07	1.51123e+07	1.51924e+07	1.22191e+07	1.88521e+07	1.81374e+07	1.6898e+07	1.35606e+07	1.4004e+07
P99024	Tubulin beta-5 chain OS=Mus musculus OX=10090 GN=Tubb5 PE=1 SV=1	Tubb5	69	22	625	3	49.6	9.73773e+06	5.98875e+06	5.65307e+06	7.91552e+06	2.38364e+07	3.49531e+06	5.21386e+06	1.63659e+07	9.5128e+06	5.56358e+06	5.3968e+06	5.13417e+06	5.71538e+06	9.39701e+06	1.42381e+07	7.90796e+06	7.54401e+06	1.02679e+07
Q8BPE4	Transmembrane protein 177 OS=Mus musculus OX=10090 GN=Tmem177 PE=1 SV=1	Tmem177	10	1	17	1	34	665845	599984	466755	721882	941255	536921	553770	166536	204817	362197	382339	568127	525005	326353	311507	476654	434464	412974
Q4VAE3	Transmembrane protein 65 OS=Mus musculus OX=10090 GN=Tmem65 PE=1 SV=1	Tmem65	9	2	18	2	24.9	1.28886e+06	376093	278438	358861	1.65609e+06	440224	471908	268515	721139	669112	120248	1.4434e+06	716624	194439		968894	810087
Q60931	Voltage-dependent anion-selective channel protein 3 OS=Mus musculus OX=10090 GN=Vdac3 PE=1 SV=1	Vdac3	47	11	292	10	30.7	1.63735e+08	9.76246e+07	9.10774e+07	9.92019e+07	1.25634e+08	1.16471e+08	1.10162e+08	9.39294e+07	1.26431e+08	9.91546e+07	7.71671e+07	1.16046e+08	1.00028e+08	8.85236e+07	1.12622e+08	1.10261e+08	1.11194e+08	1.12442e+08
Q6P5H2	Nestin OS=Mus musculus OX=10090 GN=Nes PE=1 SV=1	Nes	8	10	33	10	207	932797	1.17583e+06	1.08846e+06	2.50468e+06	3.52476e+06	1.08922e+06	1.79358e+06	1.68349e+06	2.06543e+06	1.72616e+06	1.31801e+06	1.60191e+06	1.80026e+06	1.7275e+06	1.84966e+06	1.5651e+06	1.30709e+06	1.70595e+06
Q9JJV2	Profilin-2 OS=Mus musculus OX=10090 GN=Pfn2 PE=1 SV=3	Pfn2	26	3	67	3	15	1.42562e+07	1.01658e+07	8.99825e+06	8.85153e+06	8.12559e+06	8.47829e+06	1.34278e+07	1.58065e+07	2.06481e+07	1.45162e+07	1.57317e+07	1.62029e+07	1.646e+07	1.59212e+07	1.70359e+07	1.79422e+07	1.27247e+07	1.35906e+07
Q9WUB3	Glycogen phosphorylase, muscle form OS=Mus musculus OX=10090 GN=Pygm PE=1 SV=3	Pygm	72	82	3719	66	97.2	5.74764e+09	6.20132e+09	6.30885e+09	5.31306e+09	4.63416e+09	6.57254e+09	5.40273e+09	6.22228e+09	4.35763e+09	5.98229e+09	6.11043e+09	5.08785e+09	6.57026e+09	6.66367e+09	5.71464e+09	7.04584e+09	6.26037e+09	7.10883e+09
P08228	Superoxide dismutase [Cu-Zn] OS=Mus musculus OX=10090 GN=Sod1 PE=1 SV=2	Sod1	56	9	142	9	15.9	6.93959e+07	7.97066e+07	7.36634e+07	4.11506e+07	6.25319e+07	9.09062e+07	1.07538e+08	1.06395e+08	1.09457e+08	9.84522e+07	9.61249e+07	1.08886e+08	9.59564e+07	1.02711e+08	1.54482e+08	1.1599e+08	1.00028e+08	9.95216e+07
Q9DBG7	Signal recognition particle receptor subunit alpha OS=Mus musculus OX=10090 GN=Srpra PE=1 SV=1	Srpra	14	8	85	8	69.6	5.28263e+06	5.05619e+06	4.35075e+06	6.2646e+06	6.64022e+06	5.6629e+06	6.41178e+06	6.10574e+06	6.95438e+06	4.85383e+06	5.67493e+06	4.71117e+06	5.13205e+06	4.825e+06	4.6551e+06	4.73511e+06	5.93722e+06	5.76206e+06
Q8K4L3	Supervillin OS=Mus musculus OX=10090 GN=Svil PE=1 SV=1	Svil	13	21	161	21	243	1.44477e+07	1.82594e+07	1.45474e+07	1.72072e+07	1.62991e+07	1.44243e+07	2.22838e+07	1.9673e+07	1.98915e+07	2.22248e+07	1.86349e+07	1.80721e+07	1.90415e+07	2.15271e+07	1.87601e+07	2.24736e+07	2.30999e+07	1.67509e+07
Q99M01	Phenylalanine--tRNA ligase, mitochondrial OS=Mus musculus OX=10090 GN=Fars2 PE=1 SV=1	Fars2	3	1	14	1	52.3	621217	479695		439595	359252	354800	389725	390430	590631	447452	272515	541346	334346	164549	205384	241343	483327	334350
Q64514	Tripeptidyl-peptidase 2 OS=Mus musculus OX=10090 GN=Tpp2 PE=1 SV=3	Tpp2	22	22	206	22	139.8	1.90039e+07	2.37765e+07	2.24636e+07	2.37626e+07	2.22309e+07	2.19706e+07	1.91846e+07	1.682e+07	2.42423e+07	2.06106e+07	2.00157e+07	2.11443e+07	1.87921e+07	2.01352e+07	1.73453e+07	1.80011e+07	1.77181e+07	2.05293e+07
Q8VBW6	NEDD8-activating enzyme E1 regulatory subunit OS=Mus musculus OX=10090 GN=Nae1 PE=1 SV=1	Nae1	10	4	12	4	60.2	1.10272e+06	1.08058e+06	1.18704e+06	664152	1.25142e+06	569906	277323	570050	1.04523e+06	783098	264042	1.29819e+06		1.04312e+06	754087	1.50439e+06	1.47517e+06	1.24632e+06
P21126	Ubiquitin-like protein 4A OS=Mus musculus OX=10090 GN=Ubl4a PE=1 SV=1	Ubl4a	10	2	18	2	17.8	1.51876e+06	1.05964e+06	1.50082e+06	2.12146e+06	2.21538e+06	364675	1.22047e+06	1.39312e+06	1.55754e+06	1.231e+06	552632	2.04464e+06	1.61772e+06	1.14993e+06	1.24908e+06	1.16614e+06	1.56367e+06	1.04613e+06
Q9Z255	Ubiquitin-conjugating enzyme E2 A OS=Mus musculus OX=10090 GN=Ube2a PE=1 SV=1	Ube2a	24	2	16	1	17.3	291763	133318	255585	377788	273029	172766	247073	229191	456256	342588	187719	252933	196772	163687		258512	210619	179975
Q9JMA1	Ubiquitin carboxyl-terminal hydrolase 14 OS=Mus musculus OX=10090 GN=Usp14 PE=1 SV=3	Usp14	35	15	195	15	56	2.26602e+07	2.55051e+07	2.35614e+07	2.63604e+07	2.6936e+07	2.08783e+07	2.25181e+07	2.24906e+07	2.16928e+07	2.05625e+07	1.99173e+07	2.41561e+07	1.75532e+07	2.27051e+07	1.91e+07	2.29441e+07	2.00601e+07	2.18007e+07
O88342	WD repeat-containing protein 1 OS=Mus musculus OX=10090 GN=Wdr1 PE=1 SV=3	Wdr1	61	25	367	25	66.4	3.38348e+08	2.57339e+08	2.98631e+08	3.75675e+08	3.27577e+08	2.7632e+08	2.93359e+08	2.7912e+08	3.26881e+08	3.11833e+08	2.63935e+08	3.08191e+08	2.49604e+08	2.97919e+08	2.86778e+08	3.22463e+08	3.00353e+08	2.08137e+08
Q8BND5	Sulfhydryl oxidase 1 OS=Mus musculus OX=10090 GN=Qsox1 PE=1 SV=1	Qsox1	13	6	20	6	82.7	274425	244825	465534	465445	534361	475854	987929	604853	500971	769192	220035	561966	339862	620232	1.10479e+06	925351	667293	604866
P35293	Ras-related protein Rab-18 OS=Mus musculus OX=10090 GN=Rab18 PE=1 SV=2	Rab18	26	5	46	5	23	2.64717e+07	2.03559e+07	9.32091e+06	1.5693e+07	1.73266e+07	1.72362e+07	1.29149e+07	1.13945e+07	1.47988e+07	1.45651e+07	1.08042e+07	1.86733e+07	9.97465e+06	1.26323e+07	1.19054e+07	1.4369e+07	1.47636e+07	1.65668e+07
Q9CXW4	60S ribosomal protein L11 OS=Mus musculus OX=10090 GN=Rpl11 PE=1 SV=4	Rpl11	25	4	59	4	20.2	9.04601e+06	7.91648e+06	4.42341e+06	6.56934e+06	9.78291e+06	4.42264e+06	7.75188e+06	7.38245e+06	1.22495e+07	8.22781e+06	1.00395e+07	7.42928e+06	7.74936e+06	6.48111e+06	8.75263e+06	6.74988e+06	1.0853e+07	1.06792e+07
Q5XPI3	E3 ubiquitin-protein ligase RNF123 OS=Mus musculus OX=10090 GN=Rnf123 PE=1 SV=1	Rnf123	18	18	140	18	148.6	1.34904e+07	8.07055e+06	1.21192e+07	1.58555e+07	1.67975e+07	1.16663e+07	9.21514e+06	5.96532e+06	1.5057e+07	1.443e+07	9.93467e+06	1.66641e+07	1.77431e+07	2.0963e+07	1.51455e+07	2.3679e+07	9.88103e+06	1.60252e+07
P70279	Surfeit locus protein 6 OS=Mus musculus OX=10090 GN=Surf6 PE=1 SV=1	Surf6	2	1	7	1	41.2	885737	587079	514513	545473	562964	485600	1244436	947676	1.12401e+06	894926	1.03207e+06	1.58575e+06	804266	1.08493e+06	1.3801e+06	1.10662e+06	1.18214e+06	919908
Q8BI84	Transport and Golgi organization protein 1 homolog OS=Mus musculus OX=10090 GN=Mia3 PE=1 SV=2	Mia3	2	3	12	3	213.5	229077	336567		215537	373638	332294	209083	232126	307607	372069	371376	264339	110715		183124	140852	439386	194309
Q61333	Tumor necrosis factor alpha-induced protein 2 OS=Mus musculus OX=10090 GN=Tnfaip2 PE=1 SV=2	Tnfaip2	3	1	9	1	78.1	122177	112625	122655	118506	184789	73976.8	81709.4	92590.5	147855	76810	107310	96775.1	53358.8	66157.5	101304	45983.7	89472.1	65224.4
Q8BK08	Transmembrane protein 11, mitochondrial OS=Mus musculus OX=10090 GN=Tmem11 PE=1 SV=1	Tmem11	23	4	38	4	21.3	8.38062e+06	8.55541e+06	5.0848e+06	1.02968e+07	7.81502e+06	4.95699e+06	6.70052e+06	3.58164e+06	7.74252e+06	7.32474e+06	3.80759e+06	4.83339e+06	4.30359e+06	5.19127e+06	4.79003e+06	5.90657e+06	7.20163e+06	6.00641e+06
Q8CGB3	Uveal autoantigen with coiled-coil domains and ankyrin repeats OS=Mus musculus OX=10090 GN=Uaca PE=1 SV=2	Uaca	2	2	15	2	160.7		65937.9	74255.6	343393	62430.4	188430	278461	190030	279261	123480	163717		108143	302030	364452	337654	248488	342904
P62960	Y-box-binding protein 1 OS=Mus musculus OX=10090 GN=Ybx1 PE=1 SV=3	Ybx1	14	4	65	1	35.7							1.21632e+06			631356							602387
P56501	Mitochondrial uncoupling protein 3 OS=Mus musculus OX=10090 GN=Ucp3 PE=1 SV=1	Ucp3	20	5	35	5	33.9	1.0761e+07	5.09126e+06	3.46667e+06	3.40574e+06	5.92803e+06	3.14433e+06	7.53075e+06	1.10728e+07	2.20456e+07	1.09134e+07	8.74092e+06	1.51212e+07	1.47988e+07	1.04677e+07	1.39456e+07	1.68842e+07	1.45472e+07	1.23285e+07
Q9Z1Z0	General vesicular transport factor p115 OS=Mus musculus OX=10090 GN=Uso1 PE=1 SV=2	Uso1	19	12	151	12	106.9	8.25978e+06	8.65478e+06	7.78235e+06	8.14126e+06	1.33506e+07	7.3964e+06	1.07329e+07	1.03267e+07	1.37786e+07	1.09723e+07	1.07276e+07	7.8341e+06	8.11189e+06	9.09587e+06	1.00869e+07	1.01147e+07	9.26744e+06	1.2928e+07
Q8CI94	Glycogen phosphorylase, brain form OS=Mus musculus OX=10090 GN=Pygb PE=1 SV=3	Pygb	21	18	629	4	96.7	2.82512e+06	4.9957e+06	3.47052e+06	4.13884e+06	6.58205e+06	4.03663e+06	3.58244e+06	3.88531e+06	2.45507e+06	2.24841e+06	3.72563e+06	2.05221e+06	3.81856e+06	2.58552e+06	3.16207e+06	3.86373e+06	3.77201e+06	4.78963e+06
Q9D855	Cytochrome b-c1 complex subunit 7 OS=Mus musculus OX=10090 GN=Uqcrb PE=1 SV=3	Uqcrb	47	8	168	8	13.5	1.17727e+08	5.65606e+07	5.60822e+07	7.93505e+07	1.288e+08	6.57866e+07	7.25557e+07	6.6207e+07	1.23146e+08	8.81562e+07	5.50324e+07	1.2371e+08	8.31363e+07	6.26867e+07	8.71503e+07	7.79204e+07	9.27011e+07	6.20073e+07
Q9CYH2	Peroxiredoxin-like 2A OS=Mus musculus OX=10090 GN=Prxl2a PE=1 SV=2	Prxl2a	25	5	30	5	24.4	2.06325e+06	1.197e+06	2.14352e+06	2.45148e+06	3.54151e+06	1.82643e+06	1.67942e+06	1.54967e+06	4.90367e+06	2.77985e+06	950456	1.98566e+06	2.80562e+06	2.19833e+06	6.76544e+06	1.84453e+06	1.57807e+06	1.30487e+06
Q60973	Histone-binding protein RBBP7 OS=Mus musculus OX=10090 GN=Rbbp7 PE=1 SV=1	Rbbp7	25	7	85	7	47.8	8.5759e+06	6.35637e+06	6.45396e+06	8.53374e+06	8.2836e+06	4.92688e+06	5.28138e+06	5.78692e+06	8.11875e+06	5.06017e+06	5.73777e+06	5.25196e+06	6.21583e+06	5.62871e+06	6.80387e+06	4.3405e+06	5.90482e+06	4.90643e+06
Q8BP71	RNA binding protein fox-1 homolog 2 OS=Mus musculus OX=10090 GN=Rbfox2 PE=1 SV=2	Rbfox2	4	2	16	2	47.3	99486.3	316324	354476	368766	327514	284665	287448	112998	343611	92091.6	103459	263960	120576	94320.1	172938	148766	319166	280249
P35980	60S ribosomal protein L18 OS=Mus musculus OX=10090 GN=Rpl18 PE=1 SV=3	Rpl18	29	5	48	5	21.6	6.32359e+06	6.05216e+06	4.21817e+06	3.09557e+06	3.51339e+06	5.24568e+06	7.82506e+06	8.30091e+06	1.23917e+07	5.44843e+06	1.01017e+07	6.65004e+06	9.26454e+06	1.01762e+07	2.24264e+07	1.51884e+07	9.84388e+06	9.94084e+06
P62717	60S ribosomal protein L18a OS=Mus musculus OX=10090 GN=Rpl18a PE=1 SV=1	Rpl18a	26	5	87	5	20.7	7.68931e+06	8.67591e+06	7.67807e+06	9.97585e+06	1.12829e+07	8.94996e+06	9.49616e+06	9.22235e+06	1.16644e+07	8.62026e+06	9.79684e+06	6.96458e+06	8.18863e+06	1.02492e+07	1.14713e+07	8.54199e+06	9.86791e+06	1.20687e+07
O09167	60S ribosomal protein L21 OS=Mus musculus OX=10090 GN=Rpl21 PE=1 SV=3	Rpl21	14	2	19	2	18.6	3.21426e+06	1.87388e+06	1.99866e+06	1.07837e+06	1.6965e+06	1.755e+06	1598544	2.4902e+06	3.21929e+06	2.25897e+06	1.7533e+06	2.32919e+06	3.21121e+06	2.62296e+06	3.89904e+06	3.79209e+06	3.01473e+06	2.97963e+06
Q9DB05	Alpha-soluble NSF attachment protein OS=Mus musculus OX=10090 GN=Napa PE=1 SV=1	Napa	45	10	82	10	33.2	6.96712e+07	5.74879e+07	5.63902e+07	5.86118e+07	7.23114e+07	6.78865e+07	5.24441e+07	6.13867e+07	4.6693e+07	6.48136e+07	7.21778e+07	4.16184e+07	6.5791e+07	7.23614e+07	8.79141e+07	8.18928e+07	5.95278e+07	6.06585e+07
P50427	Steryl-sulfatase OS=Mus musculus OX=10090 GN=Sts PE=1 SV=1	Sts	3	1	2	1	66.5			300265			138768					131678					98963.7		76963.9
P80318	T-complex protein 1 subunit gamma OS=Mus musculus OX=10090 GN=Cct3 PE=1 SV=1	Cct3	40	19	276	19	60.6	2.79519e+07	3.29216e+07	3.32252e+07	2.97969e+07	3.09372e+07	2.68191e+07	3.17052e+07	3.17915e+07	2.85271e+07	3.35179e+07	3.43899e+07	3.14386e+07	2.69259e+07	2.94692e+07	2.99982e+07	2.89784e+07	3.46149e+07	3.36996e+07
P62500	TSC22 domain family protein 1 OS=Mus musculus OX=10090 GN=Tsc22d1 PE=1 SV=2	Tsc22d1	1	1	4	1	109.7	409856	522180	280370	1.11494e+06	1.38425e+06	567029	603548	343750	345707	613882	274733	436093	351576	402334	263533	274101	255000
P62077	Mitochondrial import inner membrane translocase subunit Tim8 B OS=Mus musculus OX=10090 GN=Timm8b PE=1 SV=1	Timm8b	45	4	24	4	9.3	3.475e+06	1.1121e+06	2.09064e+06	3.14998e+06	5.27421e+06	3.38576e+06	3.38467e+06	3.06038e+06	4.31973e+06	3.85108e+06	2.24891e+06	1.50053e+06	2.67665e+06	2.4096e+06	2.59951e+06	1.50899e+06	3.83871e+06	2.33139e+06
Q8C1A5	Thimet oligopeptidase OS=Mus musculus OX=10090 GN=Thop1 PE=1 SV=1	Thop1	23	14	152	14	78	1.29382e+07	1.22342e+07	1.2815e+07	1.11865e+07	8.32689e+06	9.05561e+06	9.59527e+06	1.01598e+07	1.09796e+07	9.43608e+06	1.31728e+07	8.57071e+06	1.35332e+07	1.60979e+07	1.43659e+07	1.51042e+07	1.46187e+07	1.39861e+07
P07309	Transthyretin OS=Mus musculus OX=10090 GN=Ttr PE=1 SV=1	Ttr	46	5	108	5	15.8	4.71989e+07	3.75396e+07	9.21998e+07	3.87759e+07	5.83386e+07	3.93067e+07	3.58866e+07	4.52183e+07	7.13789e+07	3.82877e+07	5.66015e+07	6.38274e+07	4.30537e+07	4.31772e+07	1.23136e+08	5.38655e+07	4.11645e+07	4.37722e+07
Q9D883	Splicing factor U2AF 35 kDa subunit OS=Mus musculus OX=10090 GN=U2af1 PE=1 SV=4	U2af1	15	3	6	3	27.8	249943	266904	763470	776962	955542	270837	392994	246695	748682	1.31213e+06	358297	398105	319680	284919	468051	372673		689519
P62908	40S ribosomal protein S3 OS=Mus musculus OX=10090 GN=Rps3 PE=1 SV=1	Rps3	56	14	298	14	26.7	8.28851e+07	7.85252e+07	6.85892e+07	9.65372e+07	1.09679e+08	7.22663e+07	8.23212e+07	7.74464e+07	1.49961e+08	8.04925e+07	7.53002e+07	8.99139e+07	7.72273e+07	9.15467e+07	2.10304e+08	8.97494e+07	7.66413e+07	8.83617e+07
Q80ZK0	28S ribosomal protein S10, mitochondrial OS=Mus musculus OX=10090 GN=Mrps10 PE=1 SV=1	Mrps10	19	2	7	2	18.7
P50543	Protein S100-A11 OS=Mus musculus OX=10090 GN=S100a11 PE=1 SV=1	S100a11	16	1	16	1	11.1	352592	404423	345504	191247	449832	204423	342558	201199	573668	263020	226192	164094	237347	142928	719885			207297
P14206	40S ribosomal protein SA OS=Mus musculus OX=10090 GN=Rpsa PE=1 SV=4	Rpsa	59	12	277	12	32.8	5.71715e+07	5.38865e+07	3.88859e+07	5.90818e+07	6.84367e+07	4.2113e+07	4.87132e+07	4.78517e+07	4.94693e+07	4.95385e+07	4.54324e+07	4.57231e+07	4.16252e+07	5.60853e+07	5.63855e+07	4.82366e+07	5.40283e+07	5.31719e+07
Q8BTE0	Succinate dehydrogenase assembly factor 4, mitochondrial OS=Mus musculus OX=10090 GN=Sdhaf4 PE=3 SV=2	Sdhaf4	15	1	1	1	11.9	81532.6		45775.6						264787	153504		195559		313206	115253
Q8R0X7	Sphingosine-1-phosphate lyase 1 OS=Mus musculus OX=10090 GN=Sgpl1 PE=1 SV=1	Sgpl1	7	2	5	2	63.6	2.4537e+09	2.29424e+09	2.22352e+09	3.22256e+09	2.75245e+09	2.54293e+09	2.23131e+09	2.5316e+09	2.62317e+09	2.34647e+09	2.45109e+09	2.19219e+09	2.24102e+09	2.91141e+09	2.16311e+09	2.7856e+09	2.18248e+09	2.53735e+09
Q8BMD8	Calcium-binding mitochondrial carrier protein SCaMC-1 OS=Mus musculus OX=10090 GN=Slc25a24 PE=1 SV=1	Slc25a24	4	1	1	1	52.9	147044			309120		150643	119987	123059	192170	143882	98217.8	185891	103678	92218.9	119475	116994	174209
Q62417	Sorbin and SH3 domain-containing protein 1 OS=Mus musculus OX=10090 GN=Sorbs1 PE=1 SV=2	Sorbs1	2	2	18	2	143	935316	499788	372015	1.00743e+06	1.47036e+06	325244	526779	493537	2.00831e+06	763105	322343	595329	542988	375030	1.51482e+06	362716	543215	370187
Q7TQ48	Sarcalumenin OS=Mus musculus OX=10090 GN=Srl PE=1 SV=2	Srl	72	29	951	29	54.3	8.35585e+08	7.17284e+08	6.08286e+08	6.72102e+08	7.41978e+08	6.39251e+08	6.37789e+08	6.57173e+08	8.33548e+08	6.78521e+08	6.52177e+08	8.49196e+08	7.56828e+08	6.25026e+08	6.70436e+08	6.3562e+08	7.09339e+08	7.16896e+08
P09671	Superoxide dismutase [Mn], mitochondrial OS=Mus musculus OX=10090 GN=Sod2 PE=1 SV=3	Sod2	55	10	171	10	24.6	1.86286e+08	1.0581e+08	8.84338e+07	1.10739e+08	1.76394e+08	1.15156e+08	1.19551e+08	1.02635e+08	1.38614e+08	1.21484e+08	7.29077e+07	1.36889e+08	1.10916e+08	9.10792e+07	9.5211e+07	9.60013e+07	1.27729e+08	8.35695e+07
Q64674	Spermidine synthase OS=Mus musculus OX=10090 GN=Srm PE=1 SV=1	Srm	6	2	10	2	34	421996	580539		1.30665e+06	2.07634e+06		527842	713259	1.40443e+06	684663	419086	503343	596182	714760	1.37745e+06	448162	420096	489946
Q8BWB1	Synaptopodin 2-like protein OS=Mus musculus OX=10090 GN=Synpo2l PE=1 SV=1	Synpo2l	34	24	362	24	102.9	6.16841e+07	6.35816e+07	6.16691e+07	7.12319e+07	6.65437e+07	5.86095e+07	6.27615e+07	5.70323e+07	6.92259e+07	1.04652e+08	5.4597e+07	5.50879e+07	5.89836e+07	6.72615e+07	6.18858e+07	6.50603e+07	5.92734e+07	4.66947e+07
Q9D0I9	Arginine--tRNA ligase, cytoplasmic OS=Mus musculus OX=10090 GN=Rars1 PE=1 SV=2	Rars1	35	19	222	19	75.6	3.83123e+07	4.13313e+07	3.98354e+07	4.39204e+07	3.57402e+07	3.09442e+07	3.16756e+07	3.96865e+07	3.5601e+07	3.83469e+07	3.63985e+07	4.59931e+07	3.43219e+07	4.66727e+07	3.32101e+07	3.77232e+07	4.32186e+07	3.86148e+07
Q9JLH8	Tropomodulin-4 OS=Mus musculus OX=10090 GN=Tmod4 PE=2 SV=1	Tmod4	48	14	302	14	39.2	9.36672e+07	9.84397e+07	1.02665e+08	9.97793e+07	7.74099e+07	1.03678e+08	7.75163e+07	9.46314e+07	7.95501e+07	9.12999e+07	9.15523e+07	8.33158e+07	9.62119e+07	9.75952e+07	9.29096e+07	9.83843e+07	1.00003e+08	9.14005e+07
Q9JKB3	Y-box-binding protein 3 OS=Mus musculus OX=10090 GN=Ybx3 PE=1 SV=2	Ybx3	32	8	118	5	38.8	1.13523e+07	1.10491e+07	9.14043e+06	1.25794e+07	1.1278e+07	1.09944e+07	1.16721e+07	1.14729e+07	1.17129e+07	1.54615e+07	1.34304e+07	1.28546e+07	1.52243e+07	2.02821e+07	2.28102e+07	1.80274e+07	1.26411e+07	1.20347e+07
P47968	Ribose-5-phosphate isomerase OS=Mus musculus OX=10090 GN=Rpia PE=1 SV=2	Rpia	3	1	17	1	32.4	280522	305881	389377	315803	263090	293909	225830	292224	257443	299930	270136	221822	353405	329352	454199	253545	376951	285279
P62843	40S ribosomal protein S15 OS=Mus musculus OX=10090 GN=Rps15 PE=1 SV=2	Rps15	23	2	22	2	17	4.80752e+06	7.08127e+06	4.32532e+06	7.36629e+06	7.38549e+06	3.05217e+06	3.43119e+06	5.50269e+06	4.13105e+06	3.77265e+06	4.35366e+06	4.27582e+06	3.74474e+06	4.08664e+06	4.72861e+06	3.83322e+06	4.58771e+06	6.17658e+06
Q8R2L5	28S ribosomal protein S18c, mitochondrial OS=Mus musculus OX=10090 GN=Mrps18c PE=1 SV=1	Mrps18c	6	1	11	1	16.3	1.1636e+06	1.6893e+06	412595	1.35469e+06	892967	451553	950207	875944	1.0809e+06	946839	623563	944754	720123	1.37141e+06	1.22113e+06	789459	1.30096e+06	802691
Q8BJU0	Small glutamine-rich tetratricopeptide repeat-containing protein alpha OS=Mus musculus OX=10090 GN=Sgta PE=1 SV=2	Sgta	16	4	30	4	34.3	4.01358e+06	4.15271e+06	3.56393e+06	3.70759e+06	4.71314e+06	2.48396e+06	2.57051e+06	3.08745e+06	3.88328e+06	3.19632e+06	2.99939e+06	3.06567e+06	1.80455e+06	2.90096e+06	3.08133e+06	2.91151e+06	2.71774e+06	3.04205e+06
Q9ERB0	Synaptosomal-associated protein 29 OS=Mus musculus OX=10090 GN=Snap29 PE=1 SV=1	Snap29	11	2	5	2	29.6	593537		401562	644411	966844	175758	417398	172007	1.00423e+06	910424				1.18224e+06	1.38904e+06		811380	509275
P09925	Surfeit locus protein 1 OS=Mus musculus OX=10090 GN=Surf1 PE=1 SV=3	Surf1	9	1	2	1	34.8
P54116	Stomatin OS=Mus musculus OX=10090 GN=Stom PE=1 SV=3	Stom	9	2	6	2	31.4	9.57891e+06	1.17443e+07	7.53551e+06	1.00483e+07	1.46321e+07	9.18514e+06	9.28648e+06	6.65839e+06	1.09133e+07	1.02593e+07	1.0964e+07	1.18136e+07	7.83795e+06	1.07371e+07	7.43267e+06	5.56137e+06	9.35639e+06	1.06134e+07
Q60770	Syntaxin-binding protein 3 OS=Mus musculus OX=10090 GN=Stxbp3 PE=1 SV=1	Stxbp3	6	4	17	4	67.9	1.69755e+06	721167	6.89264e+06	949245	841062	1.06581e+06	772864	739452	8.59713e+06	709847	731744	1.46321e+06	689742	1.54699e+06	5.69767e+06	6.72262e+06	1.29474e+06	1.0772e+06
P63028	Translationally-controlled tumor protein OS=Mus musculus OX=10090 GN=Tpt1 PE=1 SV=1	Tpt1	67	8	270	8	19.5	6.61698e+07	8.40554e+07	7.12538e+07	1.03676e+08	1.15159e+08	7.14069e+07	8.14737e+07	7.95002e+07	8.66861e+07	8.00748e+07	1.05805e+08	5.63868e+07	6.57069e+07	8.33174e+07	8.4416e+07	8.59515e+07	8.08255e+07	8.2894e+07
Q8BZA9	Fructose-2,6-bisphosphatase TIGAR OS=Mus musculus OX=10090 GN=Tigar PE=1 SV=1	Tigar	46	8	98	8	29.2	1.23931e+07	1.57657e+07	1.61249e+07	1.32604e+07	1.31127e+07	1.34478e+07	1.42173e+07	1.42625e+07	1.1332e+07	1.35117e+07	1.79664e+07	1.26948e+07	1.44411e+07	1.15218e+07	8.68888e+06	1.20022e+07	1.02645e+07	1.36395e+07
Q3V009	Transmembrane emp24 domain-containing protein 1 OS=Mus musculus OX=10090 GN=Tmed1 PE=1 SV=1	Tmed1	10	2	5	2	25.2	642055	179050	298259		769595			585960				700226	266374	305261			534536	470766
Q8BH24	Transmembrane 9 superfamily member 4 OS=Mus musculus OX=10090 GN=Tm9sf4 PE=1 SV=1	Tm9sf4	3	1	16	1	74.6	456120	272010	295910		658973	213044	224221	236820	519133	390125		317140	166966	268641	456044	337061	429244
Q71LX4	Talin-2 OS=Mus musculus OX=10090 GN=Tln2 PE=1 SV=3	Tln2	25	46	352	36	253.5	1.32755e+07	2.41161e+07	1.0228e+07	2.19366e+07	2.20897e+07	1.42436e+07	2.06462e+07	1.74426e+07	1.59085e+07	2.07144e+07	1.15212e+07	1.97509e+07	1.40848e+07	2.61242e+07	5.49243e+07	1.84413e+07	2.28533e+07	1.88179e+07
Q3UDE2	Tubulin--tyrosine ligase-like protein 12 OS=Mus musculus OX=10090 GN=Ttll12 PE=1 SV=1	Ttll12	10	4	5	4	74			2.17265e+06		2.01971e+06	924232	1.00819e+06	654158	1.53223e+06	1.31916e+06	1.12414e+06	1.18596e+06	1.29893e+06	922482	1.85184e+06		1.49553e+06	2.76311e+06
Q6ZWZ2	Ubiquitin-conjugating enzyme E2 R2 OS=Mus musculus OX=10090 GN=Ube2r2 PE=1 SV=1	Ube2r2	16	4	24	3	27.1	2.68373e+06	2.72617e+06	4.45233e+06	1.14293e+06	767953	1.78604e+06	2.9889e+06	2.14168e+06	4.62601e+06	2.24359e+06	3.13024e+06	931368	1.31418e+06	2.66709e+06	3.61058e+06	868070	2.90959e+06	2.49774e+06
O08759	Ubiquitin-protein ligase E3A OS=Mus musculus OX=10090 GN=Ube3a PE=1 SV=2	Ube3a	17	13	83	13	99.8	6.86116e+06	9.00164e+06	7.97785e+06	9.01092e+06	8.08823e+06	9.35449e+06	7.13664e+06	8.4534e+06	6.88084e+06	7.25089e+06	8.68706e+06	7.40372e+06	8.92504e+06	5.33224e+06	7.56337e+06	7.6081e+06	7.50837e+06	8.34063e+06
Q6ZWU9	40S ribosomal protein S27 OS=Mus musculus OX=10090 GN=Rps27 PE=1 SV=3	Rps27	24	3	42	2	9.5	5.34909e+06	5.29469e+06	4.55884e+06	5.79453e+06	1.31415e+07	8.01417e+06	9334387	8.07236e+06	1.25445e+07	9.2481e+06	9.47526e+06	8.9441e+06	8.01552e+06	9.03679e+06	1.15569e+07	8.42865e+06	8.38236e+06	1.05936e+07
D3YXK2	Scaffold attachment factor B1 OS=Mus musculus OX=10090 GN=Safb PE=1 SV=2	Safb	3	1	2	1	105
Q9JJL3	Solute carrier organic anion transporter family member 1B2 OS=Mus musculus OX=10090 GN=Slco1b2 PE=1 SV=1	Slco1b2	2	1	1	1	76.7	987168	929304	714586	902949	566537	844296	771517	852673	553094	620711	786437	892535	534473	948913		576120	840161	999924
Q8R086	Sulfite oxidase, mitochondrial OS=Mus musculus OX=10090 GN=Suox PE=1 SV=2	Suox	9	4	57	4	60.7	5.56341e+06	2.80907e+06	1.97797e+06	2.74242e+06	3.48573e+06	4.29044e+06	5.67621e+06	5.13621e+06	5.51704e+06	5.58314e+06	3.81352e+06	8.82024e+06	4.78196e+06	7.52319e+06	5.28855e+06	5.55529e+06	4.36634e+06	5.4463e+06
Q9CY34	NEDD8-conjugating enzyme UBE2F OS=Mus musculus OX=10090 GN=Ube2f PE=1 SV=1	Ube2f	10	1	7	1	21.1	1.94641e+06	3.30861e+06	949236	1.73757e+06	1.97942e+06	2.11087e+06	2.84421e+06	4.67511e+06	2.48781e+06	2.64559e+06	2.45044e+06	2.51659e+06	2.63061e+06	2.7498e+06	1.64712e+06	2.22601e+06	2.19438e+06	2.5519e+06
Q8R5H1	Ubiquitin carboxyl-terminal hydrolase 15 OS=Mus musculus OX=10090 GN=Usp15 PE=1 SV=1	Usp15	17	14	123	13	112.3	2.28721e+07	2.43579e+07	2.29806e+07	2.36219e+07	2.62153e+07	3.96704e+07	3.55244e+07	2.90342e+07	2.43499e+07	3.04124e+07	2.78814e+07	3.69009e+07	3.96027e+07	3.50673e+07	3.97418e+07	3.45133e+07	2.85678e+07	2.75564e+07
P59016	Vacuolar protein sorting-associated protein 33B OS=Mus musculus OX=10090 GN=Vps33b PE=1 SV=1	Vps33b	3	1	7	1	70.5	85269.4	85159	79384.7	109274	151722	42033.4	79306.7	66059.7	87701.1	75807.9	55572.9	61677.4	66468.2	80455.1	131181	95136.9	76187.8	111933
Q8VDJ3	Vigilin OS=Mus musculus OX=10090 GN=Hdlbp PE=1 SV=1	Hdlbp	15	14	106	14	141.7	1.59668e+07	1.43718e+07	1.32268e+07	1.53282e+07	1.94822e+07	2.08372e+07	1.66983e+07	1.68821e+07	1.84659e+07	2.01635e+07	1.72777e+07	1.84462e+07	1.70974e+07	1.8369e+07	1.79794e+07	1.82035e+07	1.5734e+07	1.83393e+07
P97765	WW domain-binding protein 2 OS=Mus musculus OX=10090 GN=Wbp2 PE=1 SV=1	Wbp2	8	2	29	2	28	885375	855294	706709	584332	837703	1.36778e+06	1.44566e+06	394454	1.09631e+06	293741	1.32355e+06	1.48922e+06	328089	162183	1.1469e+06	173213	1.01034e+06	309474
P03888	NADH-ubiquinone oxidoreductase chain 1 OS=Mus musculus OX=10090 GN=Mtnd1 PE=1 SV=3	Mtnd1	14	5	120	5	36	2.71625e+07	1.63825e+07	1.62804e+07	2.19774e+07	4.3628e+07	1.39475e+07	1.91458e+07	1.53318e+07	3.77578e+07	2.41818e+07	1.17729e+07	2.43762e+07	1.47781e+07	9.65534e+06	1.75242e+07	1.15702e+07	1.72366e+07	1.35934e+07
Q60710	Deoxynucleoside triphosphate triphosphohydrolase SAMHD1 OS=Mus musculus OX=10090 GN=Samhd1 PE=1 SV=3	Samhd1	15	6	19	6	75.8	1.42936e+06	1.50816e+06	386702	1.31973e+06	675130	823080	504674	693150	1.41479e+06	766744	746910	753576	739628	794673	5.2636e+06	1.15521e+06	730711	1.03725e+06
P56565	Protein S100-A1 OS=Mus musculus OX=10090 GN=S100a1 PE=1 SV=2	S100a1	16	1	16	1	10.5	1.2597e+06	1.05178e+06	837849	1.44173e+06	1.17539e+06	620968	758603	743954	2.52661e+06	849884	698052	756616	849838	525645	1.03817e+06	708286	754759	485798
Q9D8Y1	Transmembrane protein 126A OS=Mus musculus OX=10090 GN=Tmem126a PE=1 SV=1	Tmem126a	14	4	36	4	21.5	5.69929e+06	4.04738e+06	3.01428e+06	4.67109e+06	6.40621e+06	3.48202e+06	7.26582e+06	4.16639e+06	6.60261e+06	5.58172e+06	4.7672e+06	9.42894e+06	4.61346e+06	4.34805e+06	6.30225e+06	6.02607e+06	5.76389e+06	3.59898e+06
Q8CGF5	TLC domain-containing protein 4 OS=Mus musculus OX=10090 GN=Tlcd4 PE=2 SV=1	Tlcd4	3	1	17	1	31.2	327966	381380	255192	309318	445558	311478	317969	373404	393517		513656	316926	483155	429419	396958	508992	396316	379205
P20801	Troponin C, skeletal muscle OS=Mus musculus OX=10090 GN=Tnnc2 PE=1 SV=2	Tnnc2	71	13	1681	12	18.1	3.40216e+09	3.77209e+09	3.76252e+09	3.58351e+09	3.019e+09	3.475e+09	3.24517e+09	3.32745e+09	4.21922e+09	3.78484e+09	4.34385e+09	3.21277e+09	3.28991e+09	3.79878e+09	4.04112e+09	3.60658e+09	4.02945e+09	3.70458e+09
Q63739	Protein tyrosine phosphatase type IVA 1 OS=Mus musculus OX=10090 GN=Ptp4a1 PE=1 SV=1	Ptp4a1	17	2	15	1	19.8	614307	664273	607189	1.25847e+06	109387	809609	515849	608710	917293	835304	627171	799083	592395	949730	1.32136e+06	850808	1.09173e+06	655509
O88346	Troponin T, slow skeletal muscle OS=Mus musculus OX=10090 GN=Tnnt1 PE=2 SV=3	Tnnt1	30	10	198	6	31.3	4.46922e+06	6.4362e+06	5.42642e+06	1.59844e+08	5.47329e+07	1.27584e+07	3.84788e+07	4.84424e+07	1.12803e+08	1.42069e+08	3.51372e+06	1.00949e+07	2.19595e+07	1.59803e+07	2.1806e+06	9.65137e+07	3.95634e+07	2.14737e+07
Q9D1D4	Transmembrane emp24 domain-containing protein 10 OS=Mus musculus OX=10090 GN=Tmed10 PE=1 SV=1	Tmed10	35	6	73	6	24.9	1.27182e+07	1.30027e+07	8.5484e+06	1.3637e+07	1.61906e+07	7.29071e+06	8.20088e+06	9.48983e+06	1.57922e+07	1.14455e+07	9.9059e+06	1.32333e+07	1.13313e+07	1.20529e+07	1.37609e+07	1.45038e+07	1.35071e+07	1.3769e+07
Q80X50	Ubiquitin-associated protein 2-like OS=Mus musculus OX=10090 GN=Ubap2l PE=1 SV=1	Ubap2l	12	10	101	10	116.7	2.49357e+06	2.19635e+06	2.36211e+06	3.26297e+06	5.15699e+06	2.17445e+06	3.3051e+06	2.62736e+06	3.91302e+06	3.76816e+06	2.36551e+06	1.71763e+06	2.03444e+06	2.84284e+06	2.66765e+06	3.01236e+06	3.45868e+06	3.95635e+06
Q9Z0P5	Twinfilin-2 OS=Mus musculus OX=10090 GN=Twf2 PE=1 SV=1	Twf2	51	13	141	13	39.4	1.33e+07	1.14518e+07	1.24004e+07	1.29636e+07	1.23643e+07	9.71867e+06	1.1143e+07	1.08343e+07	1.64099e+07	1.26353e+07	1.02944e+07	1.27233e+07	9.53822e+06	7.78586e+06	1.13703e+07	9.28652e+06	1.03632e+07	1.28751e+07
Q8C6G8	WD repeat-containing protein 26 OS=Mus musculus OX=10090 GN=Wdr26 PE=1 SV=3	Wdr26	3	1	12	1	70.5	578178	488358	621799	574255	792626	253458	415948	432103	267630	378944	283338	295652	306541	284138	519512	368664	506473	415279
Q9EQH3	Vacuolar protein sorting-associated protein 35 OS=Mus musculus OX=10090 GN=Vps35 PE=1 SV=1	Vps35	23	16	166	16	91.7	2.31665e+07	1.44617e+07	1.77284e+07	1.72751e+07	1.01921e+07	1.23052e+07	7.35543e+06	1.62163e+07	1.8807e+07	1.45792e+07	1.3415e+07	1.3464e+07	1.35862e+07	1.41221e+07	1.39206e+07	1.2783e+07	1.35245e+07	1.58016e+07
Q9CQF0	39S ribosomal protein L11, mitochondrial OS=Mus musculus OX=10090 GN=Mrpl11 PE=1 SV=1	Mrpl11	5	1	11	1	20.7	348331	190946		245650	260012	156258	268062	132346	281452	265755	113859	216894	252609	193495	156537	317839	266701	186223
Q9EQC5	N-terminal kinase-like protein OS=Mus musculus OX=10090 GN=Scyl1 PE=1 SV=1	Scyl1	3	1	8	1	89.1
Q60598	Src substrate cortactin OS=Mus musculus OX=10090 GN=Cttn PE=1 SV=2	Cttn	8	3	17	3	61.2	719477	725253	443078	976484	382680	1.11383e+06	1.22117e+06	1.21592e+06	1.8213e+06	1.59514e+06	377860	820099	1.54943e+06	2.23361e+06	7.40277e+06	1.39176e+06	782677	604672
Q9DC77	Small muscular protein OS=Mus musculus OX=10090 GN=Smpx PE=1 SV=2	Smpx	27	2	16	2	9.2	849717	362373	545194	741063	997645	318671	643553	616403	1.91184e+06	784272	905113	672303	275638	330453	1.1168e+06	472815	767761	170794
P63300	Selenoprotein W OS=Mus musculus OX=10090 GN=Selenow PE=1 SV=3	Selenow	11	1	16	1	9.7	1.19218e+06			1.14798e+06	1.74829e+06	1.29175e+06	1.11534e+06		1.61767e+06	1.0599e+06	1.13258e+06	1.3563e+06	1.15425e+06	1.05367e+06	1.17743e+06	1.07928e+06	1.22402e+06	1.43432e+06
P58871	182 kDa tankyrase-1-binding protein OS=Mus musculus OX=10090 GN=Tnks1bp1 PE=1 SV=2	Tnks1bp1	1	1	4	1	181.7				161252	199831			50475.1	168484	98874.4		79094.5	76549	59903.2	117061
Q80Z71	Tenascin-N OS=Mus musculus OX=10090 GN=Tnn PE=1 SV=2	Tnn	7	7	7	7	173	5.5962e+06	1.82391e+06	1.55559e+06	1.28352e+06	1.36656e+06	1.44535e+06	1.7413e+06	1.73039e+06	7.55722e+06	1.88305e+06	1.72202e+06	2.15891e+06	4.15216e+06	1.93504e+06	7.87864e+06	1.92358e+06	4.42148e+06	2.65277e+06
Q9JMH6	Thioredoxin reductase 1, cytoplasmic OS=Mus musculus OX=10090 GN=Txnrd1 PE=1 SV=3	Txnrd1	29	12	138	12	67	1.22453e+07	1.17749e+07	1.1843e+07	1.52991e+07	1.76326e+07	1.44782e+07	1.59483e+07	1.07324e+07	1.34492e+07	1.56921e+07	1.0941e+07	1.37925e+07	1.41113e+07	9.83222e+06	1.16671e+07	1.03654e+07	1.3703e+07	9.86478e+06
P56399	Ubiquitin carboxyl-terminal hydrolase 5 OS=Mus musculus OX=10090 GN=Usp5 PE=1 SV=1	Usp5	31	18	233	18	95.8	2.31661e+07	2.64873e+07	2.03202e+07	2.73034e+07	1.92817e+07	2.13576e+07	1.73013e+07	1.62997e+07	1.81039e+07	2.07613e+07	1.39437e+07	1.80573e+07	1.94258e+07	2.19101e+07	1.88385e+07	1.43703e+07	2.02884e+07	1.77366e+07
Q8R127	Saccharopine dehydrogenase-like oxidoreductase OS=Mus musculus OX=10090 GN=Sccpdh PE=1 SV=1	Sccpdh	14	6	46	6	47.1	4.07983e+06	2.30833e+06	5.12567e+06	1.80086e+06	4.14598e+06	2.37386e+06	3.16113e+06	3.57323e+06	7.37425e+06	5.3867e+06	2.39921e+06	3.91335e+06	3.93106e+06	2.35331e+06	5.02484e+06	3.8861e+06	4.55341e+06	4.65777e+06
Q3UTJ2	Sorbin and SH3 domain-containing protein 2 OS=Mus musculus OX=10090 GN=Sorbs2 PE=1 SV=2	Sorbs2	7	6	47	6	132.3	3.63811e+06	2.70068e+06	740740	1.1805e+06	1.83621e+06	2.13959e+06	2.43499e+06	2.70531e+06	1.8454e+06	2.53011e+06	2.05134e+06	2.01899e+06	2.75007e+06	3.2637e+06	4.11652e+06	2.88919e+06	3.33161e+06	2.26767e+06
Q6P549	Phosphatidylinositol 3,4,5-trisphosphate 5-phosphatase 2 OS=Mus musculus OX=10090 GN=Inppl1 PE=1 SV=1	Inppl1	7	7	60	7	138.9	3.2565e+06	2.70054e+06	2.44937e+06	3.64605e+06	2.56757e+06	1.8856e+06	2.1925e+06	1.95278e+06	3.64414e+06	2.58807e+06	1.45087e+06	3.17661e+06	2.03082e+06	1.15377e+06	1.81536e+06	1.77151e+06	3.35232e+06	2.20934e+06
Q8CD91	SPARC-related modular calcium-binding protein 2 OS=Mus musculus OX=10090 GN=Smoc2 PE=1 SV=1	Smoc2	14	3	25	3	49.9	49438.7	117291	61898.3	203985	252589	184276	94035	93605.8	76210.7	126789	320200	29578.5	198717	246499	177994	70923.4	330963	76320.8
Q62261	Spectrin beta chain, non-erythrocytic 1 OS=Mus musculus OX=10090 GN=Sptbn1 PE=1 SV=2	Sptbn1	39	71	651	68	274.1	6.73231e+07	4.88157e+07	3.7746e+07	6.50004e+07	8.13574e+07	4.1921e+07	4.28417e+07	5.59934e+07	7.57007e+07	5.84658e+07	4.34639e+07	6.51061e+07	5.55003e+07	7.31797e+07	8.9469e+07	5.9161e+07	6.41243e+07	6.71581e+07
Q78PY7	Staphylococcal nuclease domain-containing protein 1 OS=Mus musculus OX=10090 GN=Snd1 PE=1 SV=1	Snd1	25	19	155	19	102	2.2989e+07	2.57565e+07	2.39101e+07	2.3156e+07	2.1234e+07	2.21721e+07	2.15744e+07	2.27735e+07	2.35946e+07	2.38418e+07	2.28274e+07	2.41628e+07	1.9606e+07	2.32528e+07	2.34392e+07	2.02631e+07	1.9205e+07	2.29771e+07
P68368	Tubulin alpha-4A chain OS=Mus musculus OX=10090 GN=Tuba4a PE=1 SV=1	Tuba4a	70	19	656	6	49.9	2.70865e+08	2.62045e+08	2.65891e+08	3.07778e+08	3.57468e+08	2.1269e+08	2.24884e+08	2.85087e+08	2.53993e+08	2.907e+08	2.51573e+08	2.69154e+08	2.1611e+08	2.78679e+08	2.49073e+08	2.52995e+08	3.03899e+08	3.02985e+08
Q8CAY6	Acetyl-CoA acetyltransferase, cytosolic OS=Mus musculus OX=10090 GN=Acat2 PE=1 SV=2	Acat2	15	5	34	5	41.3	1.08877e+06	1.24752e+06	1.32317e+06	1.01525e+06	1.3021e+06	397779	3.01608e+06	1.49829e+06	2.61898e+06	1.27571e+06	865672	2.04169e+06	1.40139e+06	1.51789e+06	4.42909e+06	648931	1.19893e+06	1.4794e+06
Q8R5A6	TBC1 domain family member 22A OS=Mus musculus OX=10090 GN=Tbc1d22a PE=1 SV=3	Tbc1d22a	9	2	4	2	59.3										199271	186521	198731				131552
Q9WTQ8	Mitochondrial import inner membrane translocase subunit Tim23 OS=Mus musculus OX=10090 GN=Timm23 PE=1 SV=1	Timm23	5	1	8	1	22	592638	382362	474124	609005	979703	529239	717607	511990	706513	953230	373682	722324	450321	255906	552067	398325	537915	501726
Q9ET30	Transmembrane 9 superfamily member 3 OS=Mus musculus OX=10090 GN=Tm9sf3 PE=1 SV=1	Tm9sf3	12	4	16	4	67.5	269128	493239	1.83187e+06	1.91728e+06	3.81214e+06	856210	1.42314e+06	256831	824082	1.22865e+06	442822	2.01004e+06	657713	1.6438e+06	1.1641e+06	709521	322266	758226
Q9QZ06	Toll-interacting protein OS=Mus musculus OX=10090 GN=Tollip PE=1 SV=1	Tollip	10	2	16	2	30.3	736635	812452	926860	1.04495e+06	1.14502e+06	877587	606721	970237	1.37389e+06	721163	1.18226e+06	952034	1.06821e+06	977375	1.47213e+06	598793	717882	954907
Q9EP53	Hamartin OS=Mus musculus OX=10090 GN=Tsc1 PE=1 SV=1	Tsc1	1	1	7	1	128.7		121305	68719	88581.8		55545.9	78023.1	94106.8	84831.2	64172.1	67242.1		66035.5	86307.2	92233	74565.8	77520.2	99737.5
Q91W90	Thioredoxin domain-containing protein 5 OS=Mus musculus OX=10090 GN=Txndc5 PE=1 SV=2	Txndc5	33	9	85	9	46.4	6.5957e+06	7.24158e+06	1.76861e+06	7.07761e+06	1.17045e+07	2.99151e+06	5.8511e+06	5.94018e+06	9.12918e+06	6.36916e+06	4.20021e+06	4.77311e+06	3.81671e+06	4.62816e+06	7.77922e+06	3.21663e+06	5.63382e+06	6.37705e+06
Q00519	Xanthine dehydrogenase/oxidase OS=Mus musculus OX=10090 GN=Xdh PE=1 SV=5	Xdh	9	8	58	8	146.5	6.50624e+06	6.31587e+06	4.48427e+06	4.26161e+06	5.83237e+06	3.13316e+06	4.33689e+06	4.04461e+06	6.45948e+06	4.67528e+06	4.85396e+06	4.26336e+06	3.21837e+06	4.61855e+06	8.00975e+06	3.53725e+06	4.60025e+06	6.10456e+06
P29788	Vitronectin OS=Mus musculus OX=10090 GN=Vtn PE=1 SV=2	Vtn	23	6	38	6	54.8	1.91193e+06	1.30344e+06	2.42526e+06	1.82909e+06	1.7635e+06	1.22518e+06	1.91005e+06	1.75466e+06	2.3204e+06	1.9322e+06	1.85472e+06	2.90731e+06	1.65395e+06	2.17619e+06	4.44893e+06	2.27565e+06	2.02992e+06	1.86317e+06
Q8CC88	von Willebrand factor A domain-containing protein 8 OS=Mus musculus OX=10090 GN=Vwa8 PE=1 SV=2	Vwa8	17	28	198	28	213.3	2.55802e+07	2.77855e+07	2.18027e+07	2.19735e+07	3.50986e+07	3.32921e+07	3.27108e+07	3.17987e+07	3.14826e+07	3.16093e+07	2.54171e+07	3.39092e+07	3.0793e+07	3.16268e+07	3.12793e+07	2.6871e+07	3.00412e+07	3.10126e+07
Q91XD6	Vacuolar protein-sorting-associated protein 36 OS=Mus musculus OX=10090 GN=Vps36 PE=1 SV=1	Vps36	17	6	26	6	43.7	3.24766e+06	3.85268e+06	3.18841e+06	3.02531e+06	3.76105e+06	3.31012e+06	3.1669e+06	3.32754e+06	1.8397e+06	1.7006e+06	1.95923e+06	1.88393e+06	1.49842e+06	3.00147e+06	1.4298e+06	862219	3.03532e+06	3.07185e+06
Q9CXW2	28S ribosomal protein S22, mitochondrial OS=Mus musculus OX=10090 GN=Mrps22 PE=1 SV=1	Mrps22	23	6	43	6	41.2	1.7858e+07	1.34751e+07	7.19595e+06	1.6562e+07	7.25924e+06	1.19597e+07	7.76989e+06	8.71432e+06	2.12556e+07	1.39608e+07	8.07694e+06	1.73373e+07	1.1343e+07	1.23655e+07	1.41834e+07	1.2086e+07	1.57908e+07	1.00389e+07
Q31125	Zinc transporter SLC39A7 OS=Mus musculus OX=10090 GN=Slc39a7 PE=1 SV=2	Slc39a7	3	1	6	1	50.6									293102					97204.3			326373	268030
Q01405	Protein transport protein Sec23A OS=Mus musculus OX=10090 GN=Sec23a PE=1 SV=2	Sec23a	19	12	154	12	86.1	8.63515e+06	9.74977e+06	9.12318e+06	8.06004e+06	1.1426e+07	6.59977e+06	8.20412e+06	7.48589e+06	1.36885e+07	8.15857e+06	9.93273e+06	9.65452e+06	9.20158e+06	8.18269e+06	8.19525e+06	7.90226e+06	8.77148e+06	9.39424e+06
O09117	Synaptophysin-like protein 1 OS=Mus musculus OX=10090 GN=Sypl1 PE=1 SV=2	Sypl1	21	3	48	3	28.9	7.10732e+06	7.96588e+06	6.64018e+06	8.14873e+06	1.22314e+07	1.52742e+07	1.13249e+07	1.25539e+07	1.20989e+07	1.53666e+07	9.88282e+06	4.87141e+06	1.21113e+07	1.31569e+07	1.26354e+07	1.07118e+07	1.0585e+07	1.06739e+07
Q8C1E7	Ion channel TACAN OS=Mus musculus OX=10090 GN=Tmem120a PE=1 SV=1	Tmem120a	5	1	2	1	40.7		568966	640777	727449	597305	328840			1.03929e+06	530073	328267				861839	306155	326611	392941
Q9CQA1	Trafficking protein particle complex subunit 5 OS=Mus musculus OX=10090 GN=Trappc5 PE=1 SV=1	Trappc5	9	2	11	2	20.8	473188	357376	255586	265588	239324	179364	367705	327880	412377	513815	378930	428845	465778	547343	704984	749189	462876	442555
Q8CFI2	Ubiquitin-conjugating enzyme E2 R1 OS=Mus musculus OX=10090 GN=Cdc34 PE=1 SV=1	Cdc34	13	3	9	2	26.6	1.99152e+06	1.56551e+06	1.2167e+06	1.10989e+06		832413	1.51759e+06	1.30292e+06	1.46479e+06	1.37023e+06	730338	1.7771e+06	1.40738e+06	1.66532e+06	1.51185e+06	1.6166e+06	2.41886e+06	1.60556e+06
Q8CCJ3	E3 UFM1-protein ligase 1 OS=Mus musculus OX=10090 GN=Ufl1 PE=1 SV=2	Ufl1	2	1	16	1	89.5	192015	242401	309201	223319	249250	123770		263854	234931	134949	296325		243725	211634	232561	83750.2	219332	218157
Q91VX2	Ubiquitin-associated protein 2 OS=Mus musculus OX=10090 GN=Ubap2 PE=1 SV=1	Ubap2	5	7	48	7	117.9	3.23881e+06	3.97768e+06	2.70626e+06	4.16368e+06	5.05993e+06	2.85343e+06	3.15936e+06	3.94739e+06	4.1573e+06	4.6051e+06	2.85731e+06	2.81954e+06	897441	3.68631e+06	2.73591e+06	2.31436e+06	4.44812e+06	3.32742e+06
Q9WV55	Vesicle-associated membrane protein-associated protein A OS=Mus musculus OX=10090 GN=Vapa PE=1 SV=2	Vapa	51	11	214	10	27.8	6.30267e+07	5.11368e+07	5.90984e+07	5.18729e+07	6.45972e+07	5.29208e+07	4.80001e+07	5.40068e+07	6.56621e+07	5.34057e+07	5.82681e+07	5.06664e+07	4.89999e+07	4.53721e+07	4.54398e+07	5.06889e+07	5.93156e+07	5.99626e+07
P70398	Probable ubiquitin carboxyl-terminal hydrolase FAF-X OS=Mus musculus OX=10090 GN=Usp9x PE=1 SV=2	Usp9x	13	27	173	27	290.5	1.44094e+07	1.46171e+07	1.65517e+07	1.62019e+07	1.42391e+07	1.20278e+07	1.07861e+07	1.44897e+07	1.26603e+07	1.55501e+07	1.65438e+07	1.20714e+07	1.16517e+07	1.62838e+07	1.74984e+07	1.62768e+07	1.59836e+07	1.65803e+07
Q62465	Synaptic vesicle membrane protein VAT-1 homolog OS=Mus musculus OX=10090 GN=Vat1 PE=1 SV=3	Vat1	9	3	32	3	43.1	1.9874e+06	1.86806e+06	834216	1.2001e+06	2.27098e+06	926131	913318	978795	1.49693e+06	983899	1.20384e+06	1.46514e+06	1.23922e+06	1.44211e+06	1.60008e+06	1.48783e+06	1.07528e+06	1.48179e+06
Q9CR51	V-type proton ATPase subunit G 1 OS=Mus musculus OX=10090 GN=Atp6v1g1 PE=1 SV=3	Atp6v1g1	9	1	15	1	13.7	531656	336171	397754	498813	559881	429280	542434	582984	542867	885132	621593	783546	679176	755858	1.10948e+06	663064	543958	567203
P62852	40S ribosomal protein S25 OS=Mus musculus OX=10090 GN=Rps25 PE=1 SV=1	Rps25	28	4	57	4	13.7	1.66251e+07	1.10745e+07	9.9905e+06	1.35297e+07	1.71051e+07	1.14638e+07	1.47298e+07	1.23808e+07	1.77514e+07	1.02631e+07	1.14918e+07	1.09772e+07	9.32309e+06	1.22008e+07	2.25468e+07	1.32767e+07	1.66506e+07	1.28987e+07
P62849	40S ribosomal protein S24 OS=Mus musculus OX=10090 GN=Rps24 PE=1 SV=1	Rps24	14	2	22	2	15.4	2.04538e+06	1.89394e+06	1.09995e+06	1.36943e+06	1.22948e+06	1.41304e+06	1.85878e+06	1.46122e+06	1.77468e+06	1.04644e+06	1.78667e+06	1.12923e+06	1.34066e+06	2.42721e+06	3.4283e+06	1.90258e+06	3.48085e+06	3.41955e+06
Q9D7N3	28S ribosomal protein S9, mitochondrial OS=Mus musculus OX=10090 GN=Mrps9 PE=1 SV=3	Mrps9	21	6	47	6	44.9	5.36181e+07	4.40098e+07	4.22153e+07	3.71086e+07	4.77558e+07	3.61461e+07	4.07893e+07	3.72579e+07	3.4933e+07	3.58293e+07	3.70537e+07	4.10725e+07	3.94722e+07	4.30718e+07	2.48781e+07	3.19522e+07	3.8499e+07	3.43359e+07
Q99N84	28S ribosomal protein S18b, mitochondrial OS=Mus musculus OX=10090 GN=Mrps18b PE=1 SV=1	Mrps18b	8	2	12	2	28.7	857805	670867	258110	389386	1.7339e+06	842322	812871	1.00008e+06	898910	1.13729e+06	580477	1.14649e+06	797321	795142	750762	760532	946861	175282
Q62181	Semaphorin-3C OS=Mus musculus OX=10090 GN=Sema3c PE=1 SV=2	Sema3c	2	1	2	1	85.2	272965	188954	174328	259770	167880	402587	321506	346359	359915	325463	400187	277924	223974	243406	329256	284639	350433	305180
Q9CQA3	Succinate dehydrogenase [ubiquinone] iron-sulfur subunit, mitochondrial OS=Mus musculus OX=10090 GN=Sdhb PE=1 SV=1	Sdhb	63	16	277	16	31.8	2.2535e+08	1.47133e+08	1.22603e+08	1.32887e+08	2.4195e+08	1.11523e+08	1.2288e+08	1.3202e+08	1.73578e+08	1.63643e+08	1.09193e+08	1.78302e+08	1.62276e+08	1.24727e+08	1.04364e+08	1.32398e+08	1.49928e+08	1.15161e+08
Q8C0C7	Phenylalanine--tRNA ligase alpha subunit OS=Mus musculus OX=10090 GN=Farsa PE=1 SV=1	Farsa	34	11	96	11	57.6	7.925e+06	8.74949e+06	6.48742e+06	7.83297e+06	8.13379e+06	6.72635e+06	7.32972e+06	7.88696e+06	7.92592e+06	7.70804e+06	7.09735e+06	8.23847e+06	8.26655e+06	7.83855e+06	7.27528e+06	7.13988e+06	6.36657e+06	9.62428e+06
Q8VCA6	Transmembrane protein 161A OS=Mus musculus OX=10090 GN=Tmem161a PE=2 SV=1	Tmem161a	4	2	4	2	54	834418		165214	54085.8	264918	427734	662546	439689		530090		794418		465492	693784			544168
P97493	Thioredoxin, mitochondrial OS=Mus musculus OX=10090 GN=Txn2 PE=1 SV=1	Txn2	22	2	49	2	18.2	1.02132e+07	8.71116e+06	7.0108e+06	1.20993e+07	1.19631e+07	5.95572e+06	6.72368e+06	7.83141e+06	1.2973e+07	8.38428e+06	6.49278e+06	8.91637e+06	8.18624e+06	6.96161e+06	7.20711e+06	5.73795e+06	8.29379e+06	6.37336e+06
Q8VBT1	Beta-taxilin OS=Mus musculus OX=10090 GN=Txlnb PE=1 SV=2	Txlnb	32	14	129	14	77.2	4.06063e+07	5.78236e+07	4.59375e+07	5.50601e+07	8.19676e+07	1.01086e+08	8.54437e+07	8.24711e+07	3.82558e+07	8.51621e+07	6.49364e+07	7.62366e+07	7.9178e+07	7.90589e+07	5.48512e+07	5.77516e+07	6.31038e+07	9.13616e+07
Q60932	Voltage-dependent anion-selective channel protein 1 OS=Mus musculus OX=10090 GN=Vdac1 PE=1 SV=3	Vdac1	74	18	1122	17	32.3	1.24787e+09	1.07551e+09	5.95162e+08	9.66569e+08	9.90166e+08	7.64746e+08	7.13842e+08	7.27339e+08	1.00254e+09	8.44026e+08	5.77574e+08	9.02552e+08	9.19403e+08	7.6987e+08	6.6779e+08	7.71095e+08	9.5166e+08	7.38482e+08
Q6TEK5	Vitamin K epoxide reductase complex subunit 1-like protein 1 OS=Mus musculus OX=10090 GN=Vkorc1l1 PE=1 SV=1	Vkorc1l1	5	1	11	1	19.8	717234	757482	470332	498456	564820	958922	567151	939475	1.06977e+06	1.0446e+06	1.23565e+06	1.28367e+06	842261	512811	849826	411540	856478	1.01352e+06
Q9EP69	Phosphatidylinositol-3-phosphatase SAC1 OS=Mus musculus OX=10090 GN=Sacm1l PE=1 SV=1	Sacm1l	44	21	175	21	66.9	1.66354e+07	1.48441e+07	1.1164e+07	1.44275e+07	1.77e+07	1.34059e+07	1.5673e+07	1.53409e+07	2.19621e+07	1.86102e+07	1.56274e+07	2.14289e+07	1.55585e+07	1.60112e+07	1.71424e+07	1.89608e+07	1.50654e+07	1.59055e+07
Q9D554	Splicing factor 3A subunit 3 OS=Mus musculus OX=10090 GN=Sf3a3 PE=1 SV=2	Sf3a3	6	2	17	2	58.8	216873	255161	169414	188483	165602	96989.8	188076	290130	351281	305752	333278		227331		466681	169054	191882	241168
Q80ZW2	Protein THEM6 OS=Mus musculus OX=10090 GN=Them6 PE=1 SV=1	Them6	8	1	18	1	23.8	540865	632699	409897	608087	811705	366219	354142	456928	483572	435438	378933	495893	425085	443376	359107	400337	581628	753059
Q3TBW2	39S ribosomal protein L10, mitochondrial OS=Mus musculus OX=10090 GN=Mrpl10 PE=1 SV=2	Mrpl10	13	2	12	2	29.4	491022	373990	246667	478769	820149	168949	289567	203905	378452	233534		287693	147384	151307	174806	314367	234489	217081
P57784	U2 small nuclear ribonucleoprotein A' OS=Mus musculus OX=10090 GN=Snrpa1 PE=1 SV=2	Snrpa1	4	1	1	1	28.3
Q9CQS8	Protein transport protein Sec61 subunit beta OS=Mus musculus OX=10090 GN=Sec61b PE=1 SV=3	Sec61b	39	3	51	3	10	1.02853e+07	8.04472e+06	7.38872e+06	7.94079e+06	8.57761e+06	1.09715e+07	9.04506e+06	8.07981e+06	1.21532e+07	9.76809e+06	1.1022e+07	9.58404e+06	9.34797e+06	1.02922e+07	1.01245e+07	9.82451e+06	9.16887e+06	9.16742e+06
P80317	T-complex protein 1 subunit zeta OS=Mus musculus OX=10090 GN=Cct6a PE=1 SV=3	Cct6a	39	16	191	16	58	1.53551e+07	2.22418e+07	1.85046e+07	1.95537e+07	1.95531e+07	1.61353e+07	1.77082e+07	2.08887e+07	2.08639e+07	1.77009e+07	1.92714e+07	1.36294e+07	1.5771e+07	2.22431e+07	2.06236e+07	1.90001e+07	1.99847e+07	2.17355e+07
Q922F4	Tubulin beta-6 chain OS=Mus musculus OX=10090 GN=Tubb6 PE=1 SV=1	Tubb6	28	12	263	1	50.1	269565				341469		185045	225946	355326
Q9Z0F7	Gamma-synuclein OS=Mus musculus OX=10090 GN=Sncg PE=1 SV=1	Sncg	60	6	24	6	13.2	2.12799e+06	1.45928e+06	2.69737e+06	1.4426e+06	2.54276e+06	2.54206e+06	1.91753e+06	1.20968e+06	2.73591e+06	2.361e+06	1.19269e+06	1.69219e+06	1.32242e+06	2.31451e+06	8.94063e+06	768532	1.24706e+06	982098
Q62219	Transforming growth factor beta-1-induced transcript 1 protein OS=Mus musculus OX=10090 GN=Tgfb1i1 PE=1 SV=2	Tgfb1i1	3	1	3	1	50.1	72512.8	68969.1	55023.1	82757.6	106493	27596.5	36308.8	53943.6	67553.8	48428.5	39204.5	45323.6	45829.4	49304.6	62265.6	30280.3	48926.1	41026.2
Q9JHJ0	Tropomodulin-3 OS=Mus musculus OX=10090 GN=Tmod3 PE=1 SV=1	Tmod3	11	3	13	3	39.5	845805	2.50321e+06	260539	705633	882832	192035	1.49447e+06	3.16442e+06	5.3866e+06	1.92126e+06	2.77575e+06	1.3207e+06	3.74363e+06	1.16299e+06	3.85544e+06	982905	747768	2.40883e+06
Q62393	Tumor protein D52 OS=Mus musculus OX=10090 GN=Tpd52 PE=1 SV=2	Tpd52	5	1	1	1	24.3
P70280	Vesicle-associated membrane protein 7 OS=Mus musculus OX=10090 GN=Vamp7 PE=1 SV=1	Vamp7	3	1	13	1	25	380723	404657	564807	288191	293047	377563	411473	383747	382024	298601	260806	248828	165925	267758	358026	236145	373250	395297
Q9Z1F9	SUMO-activating enzyme subunit 2 OS=Mus musculus OX=10090 GN=Uba2 PE=1 SV=1	Uba2	8	4	15	4	70.5	1.19492e+06	310726	1.14975e+06	999960	1.27334e+06	740957	966981	1.38428e+06	1.46087e+06	854564	705141	799326	853558	380148	469944	1.07258e+06	1.15017e+06	3.18499e+06
Q8R1V4	Transmembrane emp24 domain-containing protein 4 OS=Mus musculus OX=10090 GN=Tmed4 PE=1 SV=1	Tmed4	20	5	33	5	26	3.68153e+06	2.6031e+06	1.65501e+06	3.14253e+06	3.7093e+06	1.97188e+06	2.54519e+06	2.95476e+06	3.77057e+06	2.65615e+06	1.38775e+06	2.17882e+06	2.20986e+06	2.1835e+06	3.77239e+06	2.96553e+06	2.29821e+06	3.67047e+06
Q8R317	Ubiquilin-1 OS=Mus musculus OX=10090 GN=Ubqln1 PE=1 SV=1	Ubqln1	9	4	51	3	61.9	1.56239e+06	1.88125e+06	1.40196e+06	1.08164e+06	1.9579e+06	1.50101e+06	2479961	1.54823e+06	3.16727e+06	1.55159e+06	2.11987e+06	1.81764e+06	1.16036e+06	1.15209e+06	2.75667e+06	2.3496e+06	1.80948e+06	2.67772e+06
P61080	Ubiquitin-conjugating enzyme E2 D1 OS=Mus musculus OX=10090 GN=Ube2d1 PE=1 SV=1	Ube2d1	24	3	53	2	16.6	4.66971e+06	3.96604e+06	4.66496e+06	2.7941e+06	5.29521e+06	6.28222e+06	4.3546e+06	6.22237e+06	6.44922e+06	6.15139e+06	7.96713e+06	4.19864e+06	6.63133e+06	7.82537e+06	7.05199e+06	7.87623e+06	6.83639e+06	7.27711e+06
O89116	Vesicle transport through interaction with t-SNAREs homolog 1A OS=Mus musculus OX=10090 GN=Vti1a PE=1 SV=1	Vti1a	12	1	4	1	25
Q8R2Z5	von Willebrand factor A domain-containing protein 1 OS=Mus musculus OX=10090 GN=Vwa1 PE=1 SV=1	Vwa1	32	7	59	7	44.7	6.47838e+06	5.8622e+06	6.19578e+06	6.75363e+06	1.05921e+07	5.17237e+06	6.25143e+06	4.43683e+06	6.24367e+06	5.85546e+06	6.67424e+06	3.96054e+06	6.53497e+06	5.99144e+06	5.41042e+06	3.76596e+06	6.53125e+06	6.50243e+06
Q9D1C8	Vacuolar protein sorting-associated protein 28 homolog OS=Mus musculus OX=10090 GN=Vps28 PE=1 SV=1	Vps28	19	3	20	3	25.4	2.88459e+06	2.00371e+06	3.278e+06	3.23055e+06	2.9422e+06	2.02746e+06	2.00696e+06	2.35128e+06	3.11713e+06	2.36623e+06	2.44678e+06	2.44534e+06	1.88365e+06	1.88717e+06	274742	2.29362e+06	2.33633e+06	2.70313e+06
P39447	Tight junction protein ZO-1 OS=Mus musculus OX=10090 GN=Tjp1 PE=1 SV=2	Tjp1	3	3	8	3	194.6	763617	215054	154181	160386	208077	776797	85703.6	166489	834787	975853			770593		337015	370708	674666	546222
Q9D8P4	39S ribosomal protein L17, mitochondrial OS=Mus musculus OX=10090 GN=Mrpl17 PE=1 SV=1	Mrpl17	33	4	41	4	20.2	2.78034e+07	2.51839e+07	1.69681e+07	9.16071e+06	1.2324e+07	2.78736e+07	1.98278e+07	3.05465e+07	2.95968e+07	3.07437e+07	3.17323e+07	2.60254e+07	4.16076e+07	4.4894e+07	3.91222e+07	5.39108e+07	2.65944e+07	2.8432e+07
P14069	Protein S100-A6 OS=Mus musculus OX=10090 GN=S100a6 PE=1 SV=3	S100a6	17	2	49	2	10	3.24111e+07	2.35538e+07	8.96331e+06	1.91307e+07	4.99523e+07	2.03909e+07	2.77006e+07	3.02037e+07	4.35363e+07	3.7146e+07	3.03968e+07	4.41065e+07	3.28683e+07	2.829e+07	4.27731e+07	3.16401e+07	2.70528e+07	3.26471e+07
Q64337	Sequestosome-1 OS=Mus musculus OX=10090 GN=Sqstm1 PE=1 SV=1	Sqstm1	10	3	26	3	48.1	2.5132e+06	2.63875e+06	3.62487e+06	3.57541e+06	6.65565e+06	3.62379e+06	3.00432e+06	2.7378e+06	3.05759e+06	2.97178e+06	3.44788e+06	2.19128e+06	2.73683e+06	3.01135e+06	2.92698e+06	2.64147e+06	3.74242e+06	2.49729e+06
F6ZDS4	Nucleoprotein TPR OS=Mus musculus OX=10090 GN=Tpr PE=1 SV=1	Tpr	2	4	10	4	273.8	179683	424611	459314	230893	489816	203157	484260	266224	910319	512669	410234	285308	460379	330133	535929	485100	668228	575248
Q9D2M8	Ubiquitin-conjugating enzyme E2 variant 2 OS=Mus musculus OX=10090 GN=Ube2v2 PE=1 SV=4	Ube2v2	47	6	71	6	16.4	8.12978e+07	8.49204e+07	5.9098e+07	8.04567e+07	3.44631e+07	8.89499e+07	5.38574e+07	6.79434e+07	9.0635e+07	7.80381e+07	8.05965e+07	7.5448e+07	8.66464e+07	9.08913e+07	9.12906e+07	8.89005e+07	9.1053e+07	7.79131e+07
Q9ERK4	Exportin-2 OS=Mus musculus OX=10090 GN=Cse1l PE=1 SV=1	Cse1l	37	28	309	28	110.4	4.26522e+07	4.29899e+07	4.15156e+07	4.88266e+07	4.34605e+07	3.68145e+07	3.84869e+07	3.70821e+07	2.9655e+07	3.68695e+07	3.31112e+07	3.23361e+07	3.03323e+07	3.19989e+07	3.4736e+07	3.93478e+07	3.19257e+07	3.87084e+07
O70373	Xin actin-binding repeat-containing protein 1 OS=Mus musculus OX=10090 GN=Xirp1 PE=1 SV=2	Xirp1	39	27	291	27	123.4	2.66699e+07	2.28236e+07	2.62168e+07	2.97576e+07	3.15498e+07	1.0571e+07	2.7097e+07	2.61799e+07	6.15268e+07	3.44268e+07	2.86674e+07	3.49915e+07	2.71567e+07	3.24561e+07	3.14644e+07	2.87795e+07	2.35822e+07	2.69984e+07
Q6DIC0	Probable global transcription activator SNF2L2 OS=Mus musculus OX=10090 GN=Smarca2 PE=1 SV=1	Smarca2	1	1	4	1	180.1												80192.4			136256
Q61234	Alpha-1-syntrophin OS=Mus musculus OX=10090 GN=Snta1 PE=1 SV=1	Snta1	29	12	211	11	53.6	3.35088e+07	3.16543e+07	2.47358e+07	2.93779e+07	2.2273e+07	2.71717e+07	2.38411e+07	2.95794e+07	2.97715e+07	2.81117e+07	2.91938e+07	2.79433e+07	2.69364e+07	3.2627e+07	2.5086e+07	2.81779e+07	3.13535e+07	2.80681e+07
E9Q942	Small integral membrane protein 13 OS=Mus musculus OX=10090 GN=Smim13 PE=1 SV=1	Smim13	44	2	7	2	9.9	510474		586031	485489	638266	461167	588977	374547	757792	176799	122278		38200.7		32070.2	64435.6	971491	671633
Q6P8M1	Putative deoxyribonuclease TATDN1 OS=Mus musculus OX=10090 GN=Tatdn1 PE=1 SV=1	Tatdn1	3	1	11	1	33.3	300905	316182	384175	80383.2	672226	249645	189621	299324	293198	337314	225231	367915	375103	291093	359498	415663	320757	269833
Q9CWF2	Tubulin beta-2B chain OS=Mus musculus OX=10090 GN=Tubb2b PE=1 SV=1	Tubb2b	59	20	540	4	49.9	8.66268e+06	8.69063e+06	5.86835e+06	8.18168e+06	1.43185e+07	3.54494e+06	5.68986e+06	6.07027e+06	6.09979e+06	6.09425e+06	4.46394e+06	5.88113e+06	5.9255e+06	8.74248e+06	7.51847e+06	7.09434e+06	7.29443e+06	7.88858e+06
P61087	Ubiquitin-conjugating enzyme E2 K OS=Mus musculus OX=10090 GN=Ube2k PE=1 SV=3	Ube2k	52	9	97	9	22.4	9.21346e+06	9.21202e+06	5.0723e+06	4.78238e+07	3.62485e+07	1.35843e+07	2.57179e+07	1.93193e+07	1.07538e+08	8.94516e+07	8.98599e+06	1.24233e+07	1.91692e+07	1.21091e+07	7.51793e+06	4.98802e+07	2.62182e+07	1.51618e+07
A2AN08	E3 ubiquitin-protein ligase UBR4 OS=Mus musculus OX=10090 GN=Ubr4 PE=1 SV=1	Ubr4	5	19	94	19	571.9	5.23633e+06	3.6765e+06	3.79699e+06	3.15754e+06	5.84051e+06	3.37132e+06	3.89358e+06	4.60057e+06	7.44098e+06	5.38604e+06	4.44376e+06	2.67532e+06	3.11778e+06	3.07009e+06	3.50675e+06	8.40706e+06	3.6491e+06	5.48472e+06
Q6P5E4	UDP-glucose:glycoprotein glucosyltransferase 1 OS=Mus musculus OX=10090 GN=Uggt1 PE=1 SV=4	Uggt1	25	29	218	29	176.3	5.41367e+07	3.05892e+07	4.03374e+07	3.80123e+07	5.95383e+07	5.6355e+07	5.62533e+07	4.57279e+07	4.63792e+07	5.38808e+07	4.02198e+07	5.19693e+07	4.18173e+07	4.1932e+07	4.87947e+07	4.16713e+07	4.89704e+07	4.22977e+07
Q9CR68	Cytochrome b-c1 complex subunit Rieske, mitochondrial OS=Mus musculus OX=10090 GN=Uqcrfs1 PE=1 SV=1	Uqcrfs1	58	12	216	12	29.3	2.74087e+08	2.08843e+08	1.62009e+08	2.24837e+08	3.91602e+08	1.7761e+08	2.00449e+08	1.45194e+08	2.69911e+08	2.22638e+08	1.24977e+08	2.41231e+08	1.78338e+08	1.61938e+08	1.53996e+08	1.71478e+08	2.09716e+08	1.51777e+08
Q5H8C4	Vacuolar protein sorting-associated protein 13A OS=Mus musculus OX=10090 GN=Vps13a PE=1 SV=1	Vps13a	1	2	24	2	359.2	6.10972e+06	5.38104e+06	4.054e+06	6.76016e+06	6.1558e+06	3.4754e+06	3.22422e+06	3.17584e+06	4.59096e+06	3.42758e+06	2.74979e+06	5.87122e+06	2.93151e+06	2.8146e+06	4.75453e+06	4.88081e+06	5.14173e+06	3.78725e+06
P40336	Vacuolar protein sorting-associated protein 26A OS=Mus musculus OX=10090 GN=Vps26a PE=1 SV=1	Vps26a	9	3	43	3	38.1	1.60571e+06	1.44052e+06	1.31627e+06	1.32053e+06	1.58584e+06	1.73372e+06	1.58025e+06	1.94936e+06	3.01549e+06	1.87065e+06	1.75137e+06	1.8229e+06	1.45198e+06	1.4743e+06	2.25719e+06	1.55591e+06	1.80366e+06	2.08932e+06
O88569	Heterogeneous nuclear ribonucleoproteins A2/B1 OS=Mus musculus OX=10090 GN=Hnrnpa2b1 PE=1 SV=2	Hnrnpa2b1	48	15	256	14	37.4	3.45501e+07	2.91685e+07	3.43062e+07	3.35488e+07	3.99481e+07	2.02546e+07	2.71635e+07	3.08309e+07	4.30135e+07	3.58812e+07	3.10944e+07	3.54033e+07	2.68916e+07	3.66372e+07	7.13471e+07	3.42249e+07	3.57294e+07	3.87544e+07
A2AQ25	Sickle tail protein OS=Mus musculus OX=10090 GN=Skt PE=1 SV=1	Skt	1	2	2	2	212.9	1.67347e+06	3.47168e+06	2.65545e+06	2.88799e+06	3.66271e+06	1.36852e+06	2141537	2.68391e+06	2.09937e+06	2.55678e+06	2.8287e+06	1.91287e+06	2.41765e+06	1.54952e+06	966343	1.32507e+06	2.13794e+06	2.69258e+06
P42932	T-complex protein 1 subunit theta OS=Mus musculus OX=10090 GN=Cct8 PE=1 SV=3	Cct8	38	20	266	20	59.5	5.29138e+07	5.28519e+07	5.48852e+07	5.41376e+07	5.59643e+07	3.95412e+07	4.82294e+07	5.13219e+07	6.06426e+07	4.65266e+07	4.47312e+07	5.37591e+07	4.28689e+07	4.25498e+07	5.84735e+07	4.092e+07	6.07298e+07	5.63394e+07
P61961	Ubiquitin-fold modifier 1 OS=Mus musculus OX=10090 GN=Ufm1 PE=1 SV=1	Ufm1	26	2	29	2	9.1	779290	1.59082e+06	1.57163e+06	1.79469e+06	1.9115e+06	1.56714e+06	2.01744e+06	2.24178e+06	2.22407e+06	1.81371e+06	2.08059e+06	2.51494e+06	2.09585e+06	2.45141e+06	1.4986e+06	2.44541e+06	1.66541e+06	853579
Q9CYA6	Zinc finger CCHC domain-containing protein 8 OS=Mus musculus OX=10090 GN=Zcchc8 PE=1 SV=3	Zcchc8	3	1	3	1	78
P60603	Reactive oxygen species modulator 1 OS=Mus musculus OX=10090 GN=Romo1 PE=2 SV=1	Romo1	33	2	30	2	8.2	1.91895e+06	1.09415e+06	787239	836974	1.02371e+06	1.15388e+06	813124	1.3126e+06	1.76535e+06	1.88917e+06	1.22385e+06	2.96232e+06	2.17853e+06	1.33532e+06	1.61284e+06	2.06578e+06	1.51257e+06	1.38584e+06
Q9CQR2	40S ribosomal protein S21 OS=Mus musculus OX=10090 GN=Rps21 PE=1 SV=1	Rps21	58	4	52	4	9.1	8.30011e+06	6.68779e+06	4.81343e+06	5.46502e+06	7.0305e+06	4.93897e+06	7.05901e+06	9.00867e+06	9.99838e+06	9.22904e+06	7.7672e+06	7.3259e+06	1.06888e+07	1.49896e+07	1.48151e+07	1.22891e+07	7.98467e+06	8.60503e+06
Q921R8	Solute carrier family 41 member 3 OS=Mus musculus OX=10090 GN=Slc41a3 PE=1 SV=1	Slc41a3	12	4	71	4	53.2	3.99255e+06	3.3376e+06	2.36653e+06	3.22438e+06	3.29283e+06	3.82286e+06	3.43036e+06	3.0086e+06	4.04055e+06	2.74817e+06	2.96436e+06	3.50169e+06	3.92468e+06	3.82825e+06	3.17932e+06	3.95755e+06	3.93726e+06	4.93732e+06
Q62186	Translocon-associated protein subunit delta OS=Mus musculus OX=10090 GN=Ssr4 PE=1 SV=1	Ssr4	37	5	62	5	18.9	9.20452e+06	7.15542e+06	7.04941e+06	7.59342e+06	8.77816e+06	4.45251e+06	7.03547e+06	6.33792e+06	1.0366e+07	6.77012e+06	5.34133e+06	3.77685e+06	4.12778e+06	6.03579e+06	1.04284e+07	8.48055e+06	7.80192e+06	8.2392e+06
P16254	Signal recognition particle 14 kDa protein OS=Mus musculus OX=10090 GN=Srp14 PE=1 SV=1	Srp14	21	2	8	2	12.5	9.66107e+07	7.36634e+07	6.3817e+07	7.87188e+07	1.32114e+08	5.78489e+07	6.86654e+07	4.66737e+07	9.42694e+07	7.15649e+07	4.55356e+07	9.32274e+07	7.07312e+07	4.57643e+07	4.34519e+07	4.75909e+07	7.00387e+07	5.08451e+07
Q99MR6	Serrate RNA effector molecule homolog OS=Mus musculus OX=10090 GN=Srrt PE=1 SV=1	Srrt	5	3	4	3	100.4	1.36718e+06	2.03002e+06	1.54322e+06	1.37366e+06	2.56946e+06	2.24174e+06	2.25903e+06	2.32273e+06	1.76933e+06	2.39901e+06	1.64478e+06	2.69509e+06	2.45562e+06	2.69494e+06	1.92572e+06	1.71746e+06	1.43459e+06	1.93874e+06
Q9ER72	Cysteine--tRNA ligase, cytoplasmic OS=Mus musculus OX=10090 GN=Cars1 PE=1 SV=2	Cars1	10	7	52	7	94.8	2.24921e+06	2.19442e+06	2.1326e+06	2.6878e+06	1.85079e+06	1.49593e+06	1.02272e+06	5.67885e+06	2.4905e+06	1.13657e+06	2.03816e+06	1.9902e+06	1.57103e+06	2.06115e+06	5.38066e+06	2.75243e+06	7.08775e+06	2.35179e+06
Q99KW3	TRIO and F-actin-binding protein OS=Mus musculus OX=10090 GN=Triobp PE=1 SV=3	Triobp	1	1	6	1	223.2
Q6NVE8	WD repeat-containing protein 44 OS=Mus musculus OX=10090 GN=Wdr44 PE=1 SV=1	Wdr44	2	1	4	1	101.5	121494	69781.9	177867	177330	328749	69439	109542	132858	114539	107058	154681		105602		103127		63277.6	103879
Q6P5F9	Exportin-1 OS=Mus musculus OX=10090 GN=Xpo1 PE=1 SV=1	Xpo1	14	12	102	12	123	4.27073e+06	3.02295e+06	3.43046e+06	6.88229e+06	5.15947e+06	4.16858e+06	4.29415e+06	5.91184e+06	5.89037e+06	4.88363e+06	4.37031e+06	4.76581e+06	4.52879e+06	4.91074e+06	5.20799e+06	4.78424e+06	4.94681e+06	7.30378e+06
Q9D1J3	SAP domain-containing ribonucleoprotein OS=Mus musculus OX=10090 GN=Sarnp PE=1 SV=3	Sarnp	5	1	10	1	23.5	1.9161e+06	2.70436e+06	3.03742e+06	3.14082e+06	2.26169e+06	3.49411e+06	2.94748e+06	2.24814e+06	5.41579e+06	3.05208e+06	2.67674e+06	2.25504e+06	3.7585e+06	1.31116e+06	5.39119e+06	2.13643e+06	4.50848e+06	4.47011e+06
Q9WUZ7	SH3 domain-binding glutamic acid-rich protein OS=Mus musculus OX=10090 GN=Sh3bgr PE=1 SV=1	Sh3bgr	45	8	183	8	23.1	5.14989e+07	5.20689e+07	4.4354e+07	3.94059e+07	4.66438e+07	4.22868e+07	4.9507e+07	5.00485e+07	4.57005e+07	4.78073e+07	1.10892e+08	4.40618e+07	8.70844e+07	1.12278e+08	3.86143e+07	4.13304e+07	4.57458e+07	4.44148e+07
E9PV87	Protein TALPID3 OS=Mus musculus OX=10090 GN=Talpid3 PE=1 SV=1	Talpid3	1	1	15	1	166.6	2.57083e+06	3.0157e+06	3.17327e+06	2.53352e+06	654688	2.731e+06	2.73219e+06	3.57785e+06	2.73569e+06	3.94554e+06	2.44835e+06	2.83112e+06	3.06578e+06	2.80592e+06	2.18822e+06	2.69142e+06	4.25789e+06	2.60613e+06
Q9Z2I8	Succinate--CoA ligase [GDP-forming] subunit beta, mitochondrial OS=Mus musculus OX=10090 GN=Suclg2 PE=1 SV=3	Suclg2	35	13	138	13	46.8	1.56523e+07	6.2945e+06	2.80101e+06	8.55756e+06	1.3347e+07	5.00712e+06	9.99661e+06	9.1516e+06	1.28478e+07	9.78042e+06	4.95708e+06	1.20664e+07	7.99611e+06	6.20193e+06	9.65151e+06	6.62282e+06	1.01593e+07	7.30544e+06
P98156	Very low-density lipoprotein receptor OS=Mus musculus OX=10090 GN=Vldlr PE=1 SV=1	Vldlr	2	1	3	1	96.3	138131	103255	100984	140469	120320	70121.4	98020.3	121769	199859	81732.8	66074.1	98755.7	107445	69126.5	89183.6	66849.1	41266.5	65521.3
Q8CIZ8	von Willebrand factor OS=Mus musculus OX=10090 GN=Vwf PE=1 SV=2	Vwf	1	1	2	1	309.1	98923.4		54652	34931.2		50912.4		100964	190261		100119	117463		178712	291390	160164	76615.6	122708
Q8VE47	Ubiquitin-like modifier-activating enzyme 5 OS=Mus musculus OX=10090 GN=Uba5 PE=1 SV=2	Uba5	7	1	2	1	44.8
Q5U430	E3 ubiquitin-protein ligase UBR3 OS=Mus musculus OX=10090 GN=Ubr3 PE=1 SV=3	Ubr3	2	4	34	4	212.6	662938	948855	987052	942499	832614	633968	926848	968749	824564	612043	619270	936777	826322	512726	392161	1.0001e+06	977932	840105
Q9CR26	Vacuolar protein sorting-associated protein VTA1 homolog OS=Mus musculus OX=10090 GN=Vta1 PE=1 SV=1	Vta1	3	1	3	1	33.9	263447	184124	202611	170506	385655	205399	313372	285574	209387	271193	397277	528135	408324	551958	440703	476386	249315	269054
Q9DB43	Zinc finger protein-like 1 OS=Mus musculus OX=10090 GN=Zfpl1 PE=1 SV=1	Zfpl1	5	1	13	1	34.1	394282	499080	265181	472238	562735	316526	262034	316835	132311	361340	350122	347468	318523	294556	282935	389802	436088	542463
P80313	T-complex protein 1 subunit eta OS=Mus musculus OX=10090 GN=Cct7 PE=1 SV=1	Cct7	36	15	181	15	59.6	1.2659e+07	1.15886e+07	1.38885e+07	1.72425e+07	1.78375e+07	1.06912e+07	1.1515e+07	1.27055e+07	1.51437e+07	1.28931e+07	1.34181e+07	1.08941e+07	1.30895e+07	1.67166e+07	1.54851e+07	1.53429e+07	1.36326e+07	1.47636e+07
Q9QZE7	Translin-associated protein X OS=Mus musculus OX=10090 GN=Tsnax PE=1 SV=1	Tsnax	8	2	2	2	32.9	780632	469739		588930	721541	358484	494586	318343	294439	732101	544558	1.13937e+06	227027	932377	760142	974745		351000
P35123	Ubiquitin carboxyl-terminal hydrolase 4 OS=Mus musculus OX=10090 GN=Usp4 PE=1 SV=3	Usp4	9	6	52	5	108.3	1.09147e+06	1.3273e+06	1.4152e+06	603194	649638	1.69913e+06	1.20839e+06	773409	675305	798352	807601	1.24438e+06	712353	1.31925e+06	186911	566743	475208	1.45515e+06
Q9R1Z8	Vinexin OS=Mus musculus OX=10090 GN=Sorbs3 PE=1 SV=1	Sorbs3	9	4	45	4	82.3	1.34176e+06	555045	404932	643515	842932	673868	376695	470304	1.30553e+06	910549	403126	428910	1.03827e+06	993122	1.3479e+06	982239	1.23704e+06	854671
Q9QZ88	Vacuolar protein sorting-associated protein 29 OS=Mus musculus OX=10090 GN=Vps29 PE=1 SV=1	Vps29	21	3	19	3	20.5	1.57211e+06	1.25191e+06	1.06206e+06	890755	824802	610583	1.16064e+06	1.6133e+06	1.79976e+06	1.59579e+06	1.55834e+06	2.50334e+06	1.23814e+06	2.12559e+06	3.15869e+06	1.56587e+06	1.25541e+06	1.26806e+06
P30412	Peptidyl-prolyl cis-trans isomerase C OS=Mus musculus OX=10090 GN=Ppic PE=1 SV=1	Ppic	6	1	15	1	22.8	1.53276e+06	1.34074e+06	1.11052e+06	1.43836e+06	1.29607e+06	651416	1081139	1.08873e+06	1.55028e+06	1.05873e+06	1.14636e+06	897212	914180	716638	1.1751e+06	916179	912701	1.03162e+06
Q00724	Retinol-binding protein 4 OS=Mus musculus OX=10090 GN=Rbp4 PE=1 SV=2	Rbp4	5	1	1	1	23.2
Q8CFE4	SCY1-like protein 2 OS=Mus musculus OX=10090 GN=Scyl2 PE=1 SV=1	Scyl2	2	1	6	1	103.3	261726	295559			331607	146729	271988	247152		276026	368719	225475	247919				226338	194675
Q7M729	Sodium channel subunit beta-4 OS=Mus musculus OX=10090 GN=Scn4b PE=1 SV=1	Scn4b	7	2	36	2	25.2	6.03431e+06	6.13691e+06	4.21022e+06	3.89782e+06	7.47779e+06	6.33496e+06	5.6132e+06	6.20678e+06	8.93355e+06	5.39673e+06	7.30369e+06	8.63613e+06	6.313e+06	4.19376e+06	3.95616e+06	4.35001e+06	5.94067e+06	6.59375e+06
O08547	Vesicle-trafficking protein SEC22b OS=Mus musculus OX=10090 GN=Sec22b PE=1 SV=3	Sec22b	10	3	30	3	24.7	1.88002e+06	1.44042e+06	2.08966e+06	1.81026e+06	2.15538e+06	1.43286e+06	1.57587e+06	1.61607e+06	2.09451e+06	1.63034e+06	1.56815e+06	1.53892e+06	1.24728e+06	1.41969e+06	1.71963e+06	956115	1.34055e+06	2.09067e+06
Q9D8U8	Sorting nexin-5 OS=Mus musculus OX=10090 GN=Snx5 PE=1 SV=1	Snx5	11	5	43	5	46.8	4.11475e+06	838369	900872	3.42906e+06	3.55081e+06	539900	571629	826462	904184	1.23293e+06	1.82475e+06	732560	758257	1.2375e+06	2.77145e+06	1.95619e+06	7.06319e+06	1.45012e+06
Q6ZWQ0	Nesprin-2 OS=Mus musculus OX=10090 GN=Syne2 PE=1 SV=2	Syne2	1	4	12	4	782.2	706542	833077	1.53028e+06	938901	1.58431e+06	1.19502e+06	1.59344e+06	1.34426e+06	1.38779e+06	1.30324e+06	1.40309e+06	1.16954e+06	1.20836e+06	964159	629321	1.32215e+06	1.33468e+06	1.33634e+06
P62267	40S ribosomal protein S23 OS=Mus musculus OX=10090 GN=Rps23 PE=1 SV=3	Rps23	8	2	22	2	15.8	738138	937157	345025	780997	1.54064e+06	1.10995e+06	1.19747e+06	348979	1.3169e+06	882578	950476	1.46245e+06	1.27884e+06	1.2357e+06	1.46387e+06	1.3822e+06	896760	758709
Q8BJZ4	28S ribosomal protein S35, mitochondrial OS=Mus musculus OX=10090 GN=Mrps35 PE=1 SV=2	Mrps35	18	3	27	3	36	1.00947e+06	4.68033e+06	4.10907e+06	3.37633e+06	2.81976e+06		2.60926e+06	684382	1.80132e+06	1.43022e+06	4.37835e+06	905625	3.93532e+06	650314	909805	3.42909e+06	739092	1.04627e+06
Q8CGC7	Bifunctional glutamate/proline--tRNA ligase OS=Mus musculus OX=10090 GN=Eprs1 PE=1 SV=4	Eprs1	42	49	748	48	170	8.11261e+07	6.728e+07	6.2146e+07	6.80511e+07	6.79844e+07	5.98227e+07	6.48763e+07	8.4356e+07	8.79988e+07	8.29626e+07	7.92069e+07	8.37953e+07	7.04666e+07	8.89837e+07	8.962e+07	8.24286e+07	7.75357e+07	8.30113e+07
Q8K0Z7	Translational activator of cytochrome c oxidase 1 OS=Mus musculus OX=10090 GN=Taco1 PE=1 SV=1	Taco1	25	6	51	6	32.3	1.47131e+07	1.1921e+07	6.37733e+06	6.06945e+06	9.24062e+06	9.16687e+06	1.26361e+07	1.28074e+07	2.80803e+07	1.2325e+07	8.86126e+06	1.38506e+07	1.63038e+07	1.51481e+07	2.00105e+07	2.04251e+07	1.49108e+07	1.08703e+07
Q9WUP7	Ubiquitin carboxyl-terminal hydrolase isozyme L5 OS=Mus musculus OX=10090 GN=Uchl5 PE=1 SV=2	Uchl5	8	3	24	3	37.6	1.87569e+06	2.26881e+06	2.34658e+06	2.29613e+06	3.10248e+06	2.10304e+06	2.16521e+06	1.38805e+06	2.18593e+06	1.33561e+06	1.76904e+06	1.63644e+06	1.86948e+06	1.86688e+06	1.22136e+06	2.09847e+06	2.35938e+06	2.58973e+06
Q9CQY6	Ubiquinol-cytochrome-c reductase complex assembly factor 2 OS=Mus musculus OX=10090 GN=Uqcc2 PE=1 SV=1	Uqcc2	12	1	10	1	16.3	1.03084e+06	1.16117e+06	1.14301e+06	1.23878e+06	1.89644e+06	936434	1.00719e+06	845168	297904	890873	634136	319864	935925	710021		815807	466906	397379
Q80TE0	RNA polymerase II-associated protein 1 OS=Mus musculus OX=10090 GN=Rpap1 PE=1 SV=2	Rpap1	1	1	1	1	155.2	66592.5	76322.2	107439	181212	174458	61366	94928.9	104643	134051	115492	133956	64806.9	136311	55270.2	83879.5	78165.3	116089	127747
Q9JJZ2	Tubulin alpha-8 chain OS=Mus musculus OX=10090 GN=Tuba8 PE=1 SV=1	Tuba8	57	18	438	6	50	8.17199e+07	9.45481e+07	7.1499e+07	7.18922e+07	3.51074e+07	1.01639e+08	6.13316e+07	6.79028e+07	7.22562e+07	5.87838e+07	7.22131e+07	1.15899e+08	7.37753e+07	1.07874e+08	9.095e+07	1.02557e+08	7.59612e+07	6.38959e+07
Q80YX1	Tenascin OS=Mus musculus OX=10090 GN=Tnc PE=1 SV=1	Tnc	8	13	66	13	231.7	7.81603e+06	3.08855e+06	715706	3.22665e+06	4.78102e+06	2.29507e+06	3.43336e+06	1.16421e+06	1.41635e+06	5.03774e+06	1.42575e+06	5.72492e+06	4.00923e+06	3.41015e+06	1.99966e+06	5.39931e+06	1.70039e+06	3.96878e+06
P10639	Thioredoxin OS=Mus musculus OX=10090 GN=Txn PE=1 SV=3	Txn	41	4	61	4	11.7	3.62835e+07	3.08167e+07	2.96626e+07	2.09712e+07	2.01609e+07	2.09002e+07	1.77199e+07	2.66592e+07	3.2541e+07	2.63232e+07	2.18027e+07	2.75154e+07	2.85435e+07	2.89062e+07	3.29086e+07	3.47303e+07	2.61261e+07	2.55236e+07
Q99JR5	Tubulointerstitial nephritis antigen-like OS=Mus musculus OX=10090 GN=Tinagl1 PE=1 SV=1	Tinagl1	2	1	2	1	52.6
P68037	Ubiquitin-conjugating enzyme E2 L3 OS=Mus musculus OX=10090 GN=Ube2l3 PE=1 SV=1	Ube2l3	68	7	109	7	17.9	1.82333e+07	2.02494e+07	1.83442e+07	2.30512e+07	3.08401e+07	2.38991e+07	2.50248e+07	2.30342e+07	2.45142e+07	2.5655e+07	1.98587e+07	2.28026e+07	2.36464e+07	2.40834e+07	2.69941e+07	1.94265e+07	2.46428e+07	2.13286e+07
Q8R105	Vacuolar protein sorting-associated protein 37C OS=Mus musculus OX=10090 GN=Vps37c PE=1 SV=1	Vps37c	7	2	10	2	38.4	1.88192e+06	1.889e+06	1.40425e+06	2.29335e+06	3.61481e+06	2.03748e+06	1.40402e+06	2.65541e+06	3.43101e+06	2.94716e+06	2.85683e+06	3.25763e+06	4.73786e+06	1.3151e+06	1.67953e+06	1.57019e+06	2.66713e+06	1.98413e+06
Q9EPK7	Exportin-7 OS=Mus musculus OX=10090 GN=Xpo7 PE=1 SV=3	Xpo7	7	5	38	5	123.7	389895	845338	669777	1.07816e+06	592247	611545	285800	773832	171672	909331	339040	355572	710646	343023	197123	892311	748273	618013
P46467	Vacuolar protein sorting-associated protein 4B OS=Mus musculus OX=10090 GN=Vps4b PE=1 SV=2	Vps4b	7	3	5	2	49.4	414274	389896	246031	313902	326888	404475	499731	312720	592045	278142	441625	252788			379953	204777		363070
Q9CZ13	Cytochrome b-c1 complex subunit 1, mitochondrial OS=Mus musculus OX=10090 GN=Uqcrc1 PE=1 SV=2	Uqcrc1	54	20	618	19	52.8	5.24212e+08	3.43105e+08	2.69129e+08	3.96644e+08	5.98551e+08	3.53697e+08	3.63276e+08	2.99524e+08	4.97913e+08	4.20411e+08	2.88066e+08	5.45244e+08	3.98356e+08	3.21915e+08	3.12242e+08	3.89613e+08	4.64599e+08	3.40454e+08
Q62376	U1 small nuclear ribonucleoprotein 70 kDa OS=Mus musculus OX=10090 GN=Snrnp70 PE=1 SV=2	Snrnp70	6	2	5	2	52	615753	690690		497654	467341	633534	558363	477690	250497	530021	673537	758149	717589	304452	388199	288809	396276	931122
P07759	Serine protease inhibitor A3K OS=Mus musculus OX=10090 GN=Serpina3k PE=1 SV=2	Serpina3k	26	10	202	5	46.9	7.85734e+07	8.05551e+07	1.07211e+08	1.19371e+08	1.30182e+08	5.8779e+07	9.18968e+07	1.03575e+08	1.68706e+08	1.00012e+08	1.39168e+08	7.93114e+07	7.10716e+07	6.87902e+07	2.29353e+08	9.66671e+07	1.05836e+08	8.27265e+07
Q8C7E7	Starch-binding domain-containing protein 1 OS=Mus musculus OX=10090 GN=Stbd1 PE=1 SV=1	Stbd1	33	9	128	9	36.1	1.18876e+07	5.61634e+06	8.56776e+06	5.6715e+06	4.88476e+06	5.49417e+06	6.98414e+06	1.094e+07	6.19208e+06	1.09775e+07	1.26972e+07	9.72806e+06	8.44999e+06	1.05679e+07	1.05024e+07	1.26427e+07	9.93671e+06	1.06938e+07
Q8BWF0	Succinate-semialdehyde dehydrogenase, mitochondrial OS=Mus musculus OX=10090 GN=Aldh5a1 PE=1 SV=1	Aldh5a1	10	4	11	4	55.9	1.99681e+06	893976	508028	875686	1.70101e+06	774258	187408		149614	832098		829342	189866	445454		485376	1.43394e+06	190832
Q8BZ60	Stonin-2 OS=Mus musculus OX=10090 GN=Ston2 PE=1 SV=1	Ston2	2	1	3	1	99.5	99965.6				114570				88391.7				55821.2					57882.3
Q99MN1	Lysine--tRNA ligase OS=Mus musculus OX=10090 GN=Kars1 PE=1 SV=1	Kars1	26	12	141	12	67.8	2.62084e+07	2.3493e+07	2.46415e+07	2.6535e+07	2.08166e+07	2.76027e+07	2.73967e+07	3.14495e+07	2.28131e+07	3.73802e+07	2.76255e+07	3.00145e+07	2.69928e+07	3.2428e+07	3.57601e+07	2.95666e+07	2.73902e+07	3.11242e+07
Q9R210	Transcription factor EB OS=Mus musculus OX=10090 GN=Tfeb PE=1 SV=2	Tfeb	7	2	4	2	52.6		427958		575402	509180		421250	532924	218813	289236			370592	440964	341641	387634	430673	439221
Q01853	Transitional endoplasmic reticulum ATPase OS=Mus musculus OX=10090 GN=Vcp PE=1 SV=4	Vcp	58	36	722	36	89.3	1.94327e+08	2.19514e+08	2.22033e+08	2.10818e+08	2.06374e+08	1.79415e+08	1.71296e+08	1.74589e+08	1.78771e+08	1.64819e+08	1.61847e+08	1.5371e+08	1.50918e+08	1.63411e+08	1.57702e+08	1.43975e+08	1.8918e+08	1.7926e+08
Q5SRX1	TOM1-like protein 2 OS=Mus musculus OX=10090 GN=Tom1l2 PE=1 SV=1	Tom1l2	12	4	44	4	55.6	2.45341e+06	3.04245e+06	3.92429e+06	4.85007e+06	5.69466e+06	3.05549e+06	3.05481e+06	512045	2.76574e+06	3.55225e+06	1.97609e+06	673404	1.99462e+06	2.25668e+06	2.15014e+06	1.8099e+06	2.10658e+06	1.76157e+06
Q923U0	TOM1-like protein 1 OS=Mus musculus OX=10090 GN=Tom1l1 PE=1 SV=1	Tom1l1	2	1	1	1	52.7	101463	156295	84504	175253	229491	137417	121672	107124	140697	137998	153316	160392	92451.9	150810	97088.5	142496	122567	123470
A2A8U2	Transmembrane protein 201 OS=Mus musculus OX=10090 GN=Tmem201 PE=1 SV=1	Tmem201	3	2	18	2	72.5	184403	176019	152253	189314	425562	186868	226339	355979	558189	439037	263254	393011	503004	227692	458817	365964	358433	449074
Q8VC30	Triokinase/FMN cyclase OS=Mus musculus OX=10090 GN=Tkfc PE=1 SV=1	Tkfc	3	2	9	2	59.7	18945.3	45128.9	127640	137539	640303	75097.9	2.1508e+06	495532	389567	287056	13700.7	458292	152125	169574	243836	405072	244254	653643
Q9D880	Mitochondrial import inner membrane translocase subunit TIM50 OS=Mus musculus OX=10090 GN=Timm50 PE=1 SV=1	Timm50	20	6	77	6	39.8	3.21603e+06	2.88024e+06	1.30584e+06	4.14784e+06	5.22455e+06	2.47354e+06	2.57964e+06	2.73948e+06	5.42234e+06	3.35701e+06	2.80378e+06	4.17317e+06	2.93566e+06	2.94111e+06	3.65095e+06	3.50824e+06	3.82967e+06	3.33906e+06
Q8BH58	TIP41-like protein OS=Mus musculus OX=10090 GN=Tiprl PE=1 SV=1	Tiprl	53	8	107	8	31.2	4.53398e+06	7.18153e+06	8.63292e+06	6.8898e+06	1.00291e+07	6.03175e+06	8.92868e+06	7.48493e+06	7.53556e+06	7.58124e+06	6.17614e+06	8.08074e+06	6.88631e+06	4.37778e+06	3.64481e+06	5.48794e+06	7.31156e+06	7.14061e+06
O88746	Target of Myb protein 1 OS=Mus musculus OX=10090 GN=Tom1 PE=1 SV=1	Tom1	18	6	79	6	54.3	2.96888e+06	2.98555e+06	2.52379e+06	3.70677e+06	3.00992e+06	1.92913e+06	2.86538e+06	2.95835e+06	3.23095e+06	3.45137e+06	2.24575e+06	2.50899e+06	2.99716e+06	2.16301e+06	1.7413e+06	2.3257e+06	2.79311e+06	2.38849e+06
Q8C013	Trophoblast glycoprotein-like OS=Mus musculus OX=10090 GN=Tpbgl PE=1 SV=2	Tpbgl	6	2	26	2	41.1	507497	669557	871321	559299	643927	482883	527616	332109	561745	471815	627427	452274	361615	460736	456245	536638	483505	418839
Q80U72	Protein scribble homolog OS=Mus musculus OX=10090 GN=Scrib PE=1 SV=2	Scrib	1	1	14	1	174			152698	310775	394267	143462	210045	161775	230536	171682	126538	235813	85670.2	145016	372278	189146	162729	225878
P08032	Spectrin alpha chain, erythrocytic 1 OS=Mus musculus OX=10090 GN=Spta1 PE=1 SV=3	Spta1	20	33	140	32	279.7	5.1913e+07	4.12471e+07	6.54162e+07	5.69907e+07	3.44807e+07	5.1376e+07	4.5546e+07	5.36383e+07	9.30393e+07	3.52886e+07	5.98643e+07	5.05245e+07	5.30233e+07	3.29854e+07	8.51929e+07	6.11253e+07	8.36027e+07	6.2331e+07
P97496	SWI/SNF complex subunit SMARCC1 OS=Mus musculus OX=10090 GN=Smarcc1 PE=1 SV=2	Smarcc1	1	1	1	1	122.8																		710116
P62320	Small nuclear ribonucleoprotein Sm D3 OS=Mus musculus OX=10090 GN=Snrpd3 PE=1 SV=1	Snrpd3	32	3	42	3	13.9	4.21644e+06	3.99871e+06	4.06421e+06	4.54303e+06	7.25059e+06	5.13398e+06	4.55063e+06	3.99819e+06	3.62572e+06	4.61964e+06	4.2128e+06	3.50246e+06	3.09877e+06	5.30219e+06	9.3486e+06	4.10905e+06	4.01739e+06	5.28382e+06
Q8BML9	Glutamine--tRNA ligase OS=Mus musculus OX=10090 GN=Qars1 PE=1 SV=1	Qars1	23	17	173	16	87.6	1.1583e+07	1.20564e+07	1.04797e+07	1.45778e+07	1.52125e+07	9.01451e+06	1.30525e+07	1.23834e+07	1.31395e+07	1.22605e+07	1.18929e+07	1.33249e+07	1.1628e+07	1.47377e+07	1.3181e+07	1.24627e+07	1.07081e+07	1.27387e+07
P83887	Tubulin gamma-1 chain OS=Mus musculus OX=10090 GN=Tubg1 PE=1 SV=1	Tubg1	10	2	18	2	51.1		706839	1.29533e+06	973752	2.09011e+06	974092	802652	2.1723e+06	1.60304e+06	1.33007e+06		1.04733e+06	427617	213119	671547			1.28214e+06
B1AY13	Ubiquitin carboxyl-terminal hydrolase 24 OS=Mus musculus OX=10090 GN=Usp24 PE=1 SV=1	Usp24	4	7	59	7	293.8	1.21051e+06	1.29933e+06	1.27337e+06	1.64662e+06	1.56957e+06	1.09056e+06	1.40094e+06	1.51254e+06	1.26766e+06	1.24715e+06	1.17703e+06	867546	990119	920936	1.55228e+06	1.13237e+06	1.80995e+06	1.08654e+06
Q9R0P9	Ubiquitin carboxyl-terminal hydrolase isozyme L1 OS=Mus musculus OX=10090 GN=Uchl1 PE=1 SV=1	Uchl1	21	3	43	3	24.8	2.84909e+06	2.42653e+06	1.28622e+06	2.23692e+06	6.84045e+06	1.45392e+06	3.30144e+06	5.70254e+06	5.55114e+06	4.01749e+06	2.34716e+06	3.50653e+06	5.88968e+06	5.62461e+06	3.69396e+06	2.57775e+06	6.40511e+06	3.24198e+06
Q99KU0	Vacuole membrane protein 1 OS=Mus musculus OX=10090 GN=Vmp1 PE=1 SV=2	Vmp1	9	2	14	2	45.9	434750	398400	281192	303278	329071	976975	813483	882439	474345	756199	835361	682709	633284	802425	559155	630577	867630	770625
Q9CR39	WD repeat domain phosphoinositide-interacting protein 3 OS=Mus musculus OX=10090 GN=Wdr45b PE=1 SV=2	Wdr45b	4	1	6	1	38	1.71166e+06		985871	1.06002e+06	1.0145e+06	927823	1.09395e+06		1.49317e+06	960812	771651	656270	1.04297e+06	1.09462e+06	878136	721059		1.5368e+06
Q8JZU0	NAD(P)H pyrophosphatase NUDT13, mitochondrial OS=Mus musculus OX=10090 GN=Nudt13 PE=1 SV=2	Nudt13	6	1	6	1	39.1	665268	520617	792905		4.4883e+06	579542	2.76906e+06	624439		455077	480886	488366	627371	2.4731e+06	382169	698666	2.71409e+06	504841
Q9EST4	Proteasome assembly chaperone 2 OS=Mus musculus OX=10090 GN=Psmg2 PE=1 SV=1	Psmg2	6	2	14	2	29.5	764157	1.89561e+06	1.40409e+06	1.21395e+06	2.02747e+06	1.59405e+06	1.99564e+06	1.86115e+06	1.46133e+06	793032	2.45683e+06	515705	1.89283e+06	1.28437e+06	3.09135e+06	2.15114e+06	667530	821439
P14869	60S acidic ribosomal protein P0 OS=Mus musculus OX=10090 GN=Rplp0 PE=1 SV=3	Rplp0	24	6	93	6	34.2	1.95691e+07	1.95674e+07	1.45996e+07	2.31461e+07	2.67414e+07	1.45591e+07	1.29519e+07	1.60503e+07	2.16492e+07	1.88491e+07	2.14844e+07	2.19484e+07	1.83617e+07	2.16852e+07	2.66767e+07	1.9704e+07	2.04514e+07	2.47805e+07
Q61207	Prosaposin OS=Mus musculus OX=10090 GN=Psap PE=1 SV=2	Psap	9	5	68	5	61.4	4.3631e+06	1.55319e+06	2.00618e+06	2.4196e+06	3.12741e+06	3.37605e+06	2.77059e+06	2.59866e+06	2.59548e+06	2.72144e+06	3.51571e+06	4.07286e+06	3.02723e+06	3.5142e+06	4.13201e+06	2.41361e+06	3.09564e+06	2.63843e+06
Q8CHH9	Septin-8 OS=Mus musculus OX=10090 GN=Septin8 PE=1 SV=4	Septin8	12	4	49	2	49.8	691130	387282	340433	622123	849279	119335	236588	507431	474717	386122	216745	449800	418421	543087	708248	440917	655150	627313
Q6P4S6	Serine/threonine-protein kinase SIK3 OS=Mus musculus OX=10090 GN=Sik3 PE=1 SV=3	Sik3	1	1	9	1	145.7	351762	367852	265517	443011	678095	325391	246586	225116	132277	227222	280808	423219	374207	347154	146168	336938	355657	296801
Q80YD1	ATP-dependent RNA helicase SUPV3L1, mitochondrial OS=Mus musculus OX=10090 GN=Supv3l1 PE=1 SV=1	Supv3l1	3	2	19	2	87	323600	267544	206805	461179	807188	173432	236674	156210	541050	431838	178440	412319	185841	197976	251237	364829	479208	411450
Q3UX10	Tubulin alpha chain-like 3 OS=Mus musculus OX=10090 GN=Tubal3 PE=2 SV=2	Tubal3	9	4	136	1	50	258618	393706	347205	460434	366093		279274	202965	293153	306299	226946	356627	246829		367046	231313	253760	223297
Q9DBS2	Tumor protein p63-regulated gene 1-like protein OS=Mus musculus OX=10090 GN=Tprg1l PE=1 SV=1	Tprg1l	7	1	11	1	29.8	540566	491941	437827	561279	688582	362028	391793	510163	1.01775e+06	467370	423745	449728	320696	317916	817857	525555	485842	435578
Q8BVE3	V-type proton ATPase subunit H OS=Mus musculus OX=10090 GN=Atp6v1h PE=1 SV=1	Atp6v1h	4	2	7	2	55.8	395754	249556	229801	209709	125580	146641	163326	394602	361918	283520	491843	369859	401309	178342	541419	508989	489615	250205
Q9D1K2	V-type proton ATPase subunit F OS=Mus musculus OX=10090 GN=Atp6v1f PE=1 SV=2	Atp6v1f	9	1	2	1	13.4
Q64727	Vinculin OS=Mus musculus OX=10090 GN=Vcl PE=1 SV=4	Vcl	58	51	596	51	116.6	8.79275e+08	1.18157e+09	9.29515e+08	1.17743e+09	9.26315e+08	1.43395e+09	1438443809	1.36501e+09	8.65604e+08	1.30518e+09	1.08033e+09	1.14269e+09	1.07712e+09	1.27432e+09	1.006e+09	1.03402e+09	1.30833e+09	9.70987e+08
P47962	60S ribosomal protein L5 OS=Mus musculus OX=10090 GN=Rpl5 PE=1 SV=3	Rpl5	34	9	92	9	34.4	7.20584e+07	1.20881e+08	3.23624e+07	9.03274e+07	1.67085e+08	7.43804e+07	2.62575e+08	1.25748e+08	1.02572e+08	1.96461e+08	5.94351e+07	7.95526e+07	1.85732e+08	6.90503e+07	5.57633e+07	1.32201e+08	1.05834e+08	1.59047e+08
Q8BGH2	Sorting and assembly machinery component 50 homolog OS=Mus musculus OX=10090 GN=Samm50 PE=1 SV=1	Samm50	47	18	198	18	51.8	1.14026e+08	7.224e+07	2.45732e+07	2.79861e+07	1.28571e+08	2.75321e+07	5.81258e+07	2.59513e+07	1.65332e+08	1.06167e+08	2.49205e+07	1.379e+08	3.20807e+07	2.58747e+07	3.10437e+07	8.22303e+07	3.51283e+07	2.87848e+07
Q80UG5	Septin-9 OS=Mus musculus OX=10090 GN=Septin9 PE=1 SV=1	Septin9	5	2	7	2	65.5	106315			262316	487068	184938	311958	291272	154763	478124	343418	305088	428262	513644	819634	75909.1	308993	181686
Q3TZ89	Protein transport protein Sec31B OS=Mus musculus OX=10090 GN=Sec31b PE=1 SV=2	Sec31b	4	3	26	2	125.6		371458				99655.7	195658	105127	148514		96529.7	101175		118106			201143	152675
P97443	Histone-lysine N-methyltransferase Smyd1 OS=Mus musculus OX=10090 GN=Smyd1 PE=1 SV=3	Smyd1	59	23	557	23	56.5	1.78008e+08	1.80847e+08	1.50416e+08	1.73087e+08	1.88042e+08	1.92297e+08	1.52191e+08	1.57982e+08	1.53916e+08	1.66939e+08	1.66578e+08	1.92155e+08	1.83045e+08	1.85349e+08	1.50293e+08	1.6359e+08	1.6993e+08	1.59633e+08
Q91WQ3	Tyrosine--tRNA ligase, cytoplasmic OS=Mus musculus OX=10090 GN=Yars1 PE=1 SV=3	Yars1	28	14	172	14	59.1	1.41583e+07	1.47217e+07	1.10634e+07	1.15973e+07	1.1383e+07	1.47352e+07	1.44756e+07	1.34897e+07	1.28338e+07	1.5104e+07	1.4562e+07	1.64857e+07	1.67383e+07	2.05452e+07	1.53567e+07	1.46576e+07	1.32493e+07	1.34272e+07
P10637	Microtubule-associated protein tau OS=Mus musculus OX=10090 GN=Mapt PE=1 SV=3	Mapt	14	6	65	6	76.2	4.52144e+06	3.5481e+06	2.54852e+06	6.17565e+06	5.73533e+06	2.92018e+06	4.60068e+06	5.95924e+06	7.90374e+06	5.65344e+06	4.35693e+06	4.48438e+06	4.05604e+06	5.44504e+06	4.29036e+06	4.43248e+06	5.58944e+06	5.08213e+06
O08784	Treacle protein OS=Mus musculus OX=10090 GN=Tcof1 PE=1 SV=1	Tcof1	1	1	1	1	134.9					97691.1	51409.4	40731	33804.3							250716
P58021	Transmembrane 9 superfamily member 2 OS=Mus musculus OX=10090 GN=Tm9sf2 PE=1 SV=1	Tm9sf2	5	2	23	2	75.3	341552	612273	257207	580041	424339	758097	850598	836783	1.42248e+06	544868	768853	213654	664116	782111	1.38409e+06	322757	439453	578168
Q569Z6	Thyroid hormone receptor-associated protein 3 OS=Mus musculus OX=10090 GN=Thrap3 PE=1 SV=1	Thrap3	4	3	14	3	108.1	541112	1.10664e+06	916684		1.51487e+06	677251	961745	372388	522651	196124	965734	607977	766084	404619	1.82128e+06	1.11099e+06	480332	1.13398e+06
Q8CDN6	Thioredoxin-like protein 1 OS=Mus musculus OX=10090 GN=Txnl1 PE=1 SV=3	Txnl1	45	8	110	8	32.2	1.42244e+07	1.31366e+07	1.01252e+07	1.13541e+07	1.29449e+07	8.93737e+06	1.07067e+07	1.01591e+07	1.59802e+07	6.69501e+06	5.56527e+06	7.98115e+06	6.13481e+06	1.02428e+07	1.24765e+07	8.10231e+06	1.12604e+07	9.55477e+06
Q8C7R4	Ubiquitin-like modifier-activating enzyme 6 OS=Mus musculus OX=10090 GN=Uba6 PE=1 SV=1	Uba6	3	3	33	3	117.9	248384	534388	758062	410034	885494	306303	928943	752212	654496	583899	618297	491480	313906	649361	624926	446088	244973	574169
Q3UJD6	Ubiquitin carboxyl-terminal hydrolase 19 OS=Mus musculus OX=10090 GN=Usp19 PE=1 SV=1	Usp19	2	2	5	2	150.5	931147	1.42636e+06		1.02484e+06	50597.1	164050	146311	1.05113e+06			23738.6		671612	714160		1.09904e+06	136535	198383
Q80WQ2	Protein VAC14 homolog OS=Mus musculus OX=10090 GN=Vac14 PE=1 SV=1	Vac14	2	1	17	1	88		267497		468544	297976	191224	189595	209620	264797	199500		230417		183860	325804	280038	298106	491444
P69566	Ran-binding protein 9 OS=Mus musculus OX=10090 GN=Ranbp9 PE=1 SV=1	Ranbp9	1	1	2	1	71	448546	281571	248415	367359	966403	210837	333013	190238	743473	351585	288769	383302	360913	282080	127037	211046	360923	242924
Q9CWZ3	RNA-binding protein 8A OS=Mus musculus OX=10090 GN=Rbm8a PE=1 SV=4	Rbm8a	22	3	29	3	19.9	1.23473e+06	1.23695e+06	967876	1.10885e+06	979500	403277	1.59681e+06	2.05274e+06	2.09911e+06	799802	2.07895e+06	2.29415e+06	2.32179e+06	1.86412e+06	3.10866e+06	1.68099e+06	1.77556e+06	1.89438e+06
P26043	Radixin OS=Mus musculus OX=10090 GN=Rdx PE=1 SV=3	Rdx	45	28	358	17	68.5	7.98315e+07	6.01024e+07	6.45589e+07	6.98786e+07	7.8578e+07	5.56952e+07	6.38578e+07	6.4578e+07	7.17696e+07	6.64469e+07	6.62525e+07	6.39375e+07	5.99589e+07	6.54148e+07	7.64844e+07	5.75343e+07	6.22541e+07	6.63532e+07
Q61550	Double-strand-break repair protein rad21 homolog OS=Mus musculus OX=10090 GN=Rad21 PE=1 SV=3	Rad21	2	1	3	1	72	473196	468289	627333		227081		193559	351797	191714		441215	307789		386249	202668	124791	160966	427805
Q9CQ71	Replication protein A 14 kDa subunit OS=Mus musculus OX=10090 GN=Rpa3 PE=1 SV=1	Rpa3	16	1	8	1	13.6	389056	312772					108878		1.05082e+06		131804				99933.6		468751
Q99N95	39S ribosomal protein L3, mitochondrial OS=Mus musculus OX=10090 GN=Mrpl3 PE=1 SV=1	Mrpl3	6	1	8	1	39.1		637372	766664	1.12556e+06	2.14695e+06	517730	715605	1.1146e+06	1.0698e+06	704072	471562	1.71417e+06	634356	690466	609024	1.13992e+06	899698	808747
O55142	60S ribosomal protein L35a OS=Mus musculus OX=10090 GN=Rpl35a PE=1 SV=2	Rpl35a	32	4	59	4	12.5	9.15244e+06	7.19337e+06	8.63062e+06	1.19735e+07	1.56369e+07	1.3889e+07	1.07647e+07	1.28589e+07	1.48914e+07	1.14744e+07	1.46042e+07	9.88319e+06	1.26867e+07	1.27227e+07	1.56847e+07	1.23324e+07	1.40993e+07	1.62711e+07
P42225	Signal transducer and activator of transcription 1 OS=Mus musculus OX=10090 GN=Stat1 PE=1 SV=1	Stat1	4	2	10	2	87.1		172583	172799	247065	379293		244343		201963	239077	232616				497801	162702	317221
P42227	Signal transducer and activator of transcription 3 OS=Mus musculus OX=10090 GN=Stat3 PE=1 SV=2	Stat3	4	2	5	2	88	264064			463962	306378			373356	1.69098e+06	460369	418036	588947			348908		246277	306536
P80314	T-complex protein 1 subunit beta OS=Mus musculus OX=10090 GN=Cct2 PE=1 SV=4	Cct2	47	17	194	17	57.4	1.92e+07	1.97227e+07	1.9044e+07	2.08447e+07	2.72687e+07	1.17459e+07	1.98511e+07	1.66882e+07	1.47706e+07	1.39467e+07	2.12182e+07	1.2889e+07	1.32222e+07	2.03573e+07	1.55744e+07	1.42982e+07	1.61902e+07	1.48781e+07
Q8BLY2	Threonine--tRNA ligase 2, cytoplasmic OS=Mus musculus OX=10090 GN=Tars3 PE=1 SV=1	Tars3	21	14	147	13	91.3	8.1443e+06	8.26129e+06	6.77483e+06	8.15369e+06	1.10908e+07	1.09784e+07	1.03029e+07	1.17928e+07	1.1637e+07	1.16798e+07	9.46094e+06	9.68202e+06	1.06693e+07	1.03688e+07	1.09067e+07	1.09257e+07	1.06933e+07	1.28929e+07
Q4VBD2	Transmembrane anterior posterior transformation protein 1 OS=Mus musculus OX=10090 GN=Tapt1 PE=1 SV=2	Tapt1	10	4	39	4	63.9	4.29128e+06	3.81371e+06	3.07803e+06	2.06464e+06	3.01848e+06	2.15542e+06	2.71084e+06	2.64839e+06	3.60347e+06	3.29721e+06	2.76836e+06	2.04073e+06	1.75998e+06	3.28726e+06	3.89355e+06	4.89716e+06	1.70431e+06	3.64043e+06
P48428	Tubulin-specific chaperone A OS=Mus musculus OX=10090 GN=Tbca PE=1 SV=3	Tbca	40	4	45	4	12.8	5.15676e+06	5.59399e+06	1.1901e+06	1.6591e+06	5.35014e+06	1.39685e+06	3.37807e+06	3.92353e+06	3.98409e+06	3.93927e+06	3.0281e+06	4.06911e+06	1.14924e+06	2.97209e+06	4.30828e+06	3.21686e+06	1.34595e+06	2.50833e+06
Q8VD26	Transmembrane protein 143 OS=Mus musculus OX=10090 GN=Tmem143 PE=1 SV=1	Tmem143	11	3	30	3	51.6	953043	87541.1		806457	3.80047e+06	726804	526202	691976	1.81573e+06	1.04884e+06	679050	1.88578e+06	1.96099e+06	721371	688673	1.71412e+06	716037	2.00974e+06
Q9DAV9	Trimeric intracellular cation channel type B OS=Mus musculus OX=10090 GN=Tmem38b PE=1 SV=1	Tmem38b	13	3	14	3	32.6	122571	162394	74733.2	349687	718053	493043	112877	490111	562232	708909	889075	506374	713846	815381	907624	831688	704123	735576
A3KMP2	Tetratricopeptide repeat protein 38 OS=Mus musculus OX=10090 GN=Ttc38 PE=1 SV=2	Ttc38	11	4	25	4	52.2	1.49933e+06	1.32613e+06	600165	1.73785e+06	2.31132e+06	947416	1.53194e+06	1.16902e+06	1.47219e+06	1.27182e+06	852364	1.09433e+06	1.1686e+06	810817	1.69754e+06	938050	1.22247e+06	1.27086e+06
E9Q137	Testis-expressed protein 264 homolog OS=Mus musculus OX=10090 GN=Tex264 PE=2 SV=1	Tex264	9	2	3	2	33.6	102336	75672.9	66214	109908	142300	239023	203633	63625.7	404520	349884	123112	183369	246665	135136	327238	381583	131460	329905
Q61187	Tumor susceptibility gene 101 protein OS=Mus musculus OX=10090 GN=Tsg101 PE=1 SV=2	Tsg101	12	4	22	4	44.1	2.08374e+06	1.97112e+06	1.62307e+06	1.7538e+06	5.55474e+06	1.12626e+06	1.35122e+06	1.82826e+06	1.70118e+06	1.39784e+06	1.5284e+06	1.39055e+06	1.29171e+06	1.63492e+06	2.12039e+06	932531	1.33706e+06	1.59087e+06
Q9JLT4	Thioredoxin reductase 2, mitochondrial OS=Mus musculus OX=10090 GN=Txnrd2 PE=1 SV=4	Txnrd2	13	3	37	3	56.6	2.36589e+06	1.19756e+06	1.64155e+06	2.29502e+06	3.14767e+06	1.67822e+06	1.98601e+06	1.58766e+06	2.28175e+06	1.85291e+06	1.6387e+06	2.51289e+06	1.43288e+06	2.20255e+06	2.79312e+06	1.13983e+06	1.83036e+06	1.45233e+06
P47915	60S ribosomal protein L29 OS=Mus musculus OX=10090 GN=Rpl29 PE=1 SV=2	Rpl29	7	1	16	1	17.6	4.01321e+06	3.16827e+06	2.35339e+06	4.35148e+06	3.56901e+06	2.28944e+06	3.25461e+06	4.39748e+06	6.87469e+06	3.57852e+06	3.47054e+06	2.90617e+06	3.55591e+06	3.76231e+06	6.44955e+06	5.43308e+06	4.37799e+06	4.15557e+06
P27659	60S ribosomal protein L3 OS=Mus musculus OX=10090 GN=Rpl3 PE=1 SV=3	Rpl3	10	4	28	4	46.1	1.02181e+06	1.09697e+06	2.83351e+06	2.11966e+06	1.542e+06	2.74825e+06	2.25698e+06	1.14749e+06	3.85723e+06	1.24331e+06	1.28027e+06	1.16901e+06	1.42107e+06	1.89447e+06	5.88309e+06	927008	1.58216e+06	1.37144e+06
P61514	60S ribosomal protein L37a OS=Mus musculus OX=10090 GN=Rpl37a PE=1 SV=2	Rpl37a	32	3	35	3	10.3	1.15411e+06	54808.8		1.44297e+06	2.6087e+06	118171	1.57482e+06	135455	1.84799e+06	1.73253e+06	1.92968e+06	1.63966e+06	209460	2.58861e+06	2.84282e+06	1.52591e+06	2.23592e+06	1.78817e+06
P47964	60S ribosomal protein L36 OS=Mus musculus OX=10090 GN=Rpl36 PE=1 SV=2	Rpl36	10	1	13	1	12.2	636060	883822	527194	905787	124461	1.19935e+06	918984	1.84539e+06	1.35135e+06	1.34342e+06	2.26108e+06	1.0015e+06	1.34491e+06	1.45984e+06	1.56893e+06	1.84612e+06	1.43503e+06	1.63202e+06
Q9D666	SUN domain-containing protein 1 OS=Mus musculus OX=10090 GN=Sun1 PE=1 SV=2	Sun1	9	5	30	5	101.9	792159	1.0138e+06	576624	1.03096e+06	1.38038e+06	223959	577534	816043	413933	954836	496010	1.29565e+06	826185	692314	143838	286174	642858	455693
Q9D0R2	Threonine--tRNA ligase 1, cytoplasmic OS=Mus musculus OX=10090 GN=Tars1 PE=1 SV=2	Tars1	21	12	119	11	83.3	1.00087e+07	1.19234e+07	8.73872e+06	1.23397e+07	1.25633e+07	8.45792e+06	8.72018e+06	1.24123e+07	1.07572e+07	9.85484e+06	1.13262e+07	1.0181e+07	1.01685e+07	8.69969e+06	1.00314e+07	1.13151e+07	1.00212e+07	1.20716e+07
Q9DCG9	Multifunctional methyltransferase subunit TRM112-like protein OS=Mus musculus OX=10090 GN=Trmt112 PE=1 SV=1	Trmt112	31	3	20	3	14.1	1.95829e+06	1.52551e+06	1.84225e+06	1.70219e+06	1.82587e+06	1.71308e+06	2.89079e+06	1.90214e+06	1.9398e+06	1.25222e+06	1.79778e+06	1.97989e+06	1.01565e+06	1.4513e+06	2.23015e+06	1.1004e+06	1.57557e+06	1.8923e+06
O88623	Ubiquitin carboxyl-terminal hydrolase 2 OS=Mus musculus OX=10090 GN=Usp2 PE=1 SV=2	Usp2	4	2	22	2	68.8	1.06084e+06	1.08846e+06	228848	1.23852e+06	952060	655737	997784	907029	1.38229e+06	1.08433e+06	839703	541082	535674	766161	450347	873679	793693	879985
Q9CWU6	Ubiquinol-cytochrome-c reductase complex assembly factor 1 OS=Mus musculus OX=10090 GN=Uqcc1 PE=1 SV=1	Uqcc1	14	3	46	3	34.3	3.21316e+06	2.83149e+06	2.14889e+06	3.27205e+06	5.33811e+06	2.48036e+06	2.20113e+06	2.30848e+06	2.57746e+06	2.53485e+06	1.97837e+06	2.04789e+06	2.30206e+06	2.35771e+06	1.7931e+06	3.09672e+06	2.79253e+06	2.63211e+06
Q6PHN9	Ras-related protein Rab-35 OS=Mus musculus OX=10090 GN=Rab35 PE=1 SV=1	Rab35	18	3	31	1	23
P63011	Ras-related protein Rab-3A OS=Mus musculus OX=10090 GN=Rab3a PE=1 SV=1	Rab3a	26	5	58	3	25	2.17426e+06	1.55618e+06	1.23899e+06	2.34074e+06	2.79943e+06	1.55159e+06	2.11638e+06	1.38882e+06	2.98991e+06	2.85863e+06	1.93991e+06	1.61629e+06	1.24093e+06	1.60468e+06	1.79033e+06	1.54308e+06	1.5091e+06	2.55573e+06
P14115	60S ribosomal protein L27a OS=Mus musculus OX=10090 GN=Rpl27a PE=1 SV=5	Rpl27a	13	2	22	2	16.6		1.0219e+06	596113	2.1735e+06	1.9722e+06	2.28561e+06	1355542	639977	1.28117e+06	782537	1.15169e+06	521690	350819	1.96679e+06	3.19591e+06	1.3717e+06	1.13579e+06	1.24264e+06
Q9CQC9	GTP-binding protein SAR1b OS=Mus musculus OX=10090 GN=Sar1b PE=1 SV=1	Sar1b	54	7	126	5	22.4	6.59528e+07	6.39166e+07	5.36734e+07	5.89719e+07	1.09817e+08	7.36446e+07	6.9465e+07	6.87799e+07	9.4088e+07	6.46368e+07	7.87197e+07	7.60796e+07	7.07706e+07	6.57737e+07	8.50331e+07	5.63783e+07	6.80977e+07	7.43146e+07
Q9CZC8	Secernin-1 OS=Mus musculus OX=10090 GN=Scrn1 PE=1 SV=1	Scrn1	3	1	1	1	46.3
O54988	STE20-like serine/threonine-protein kinase OS=Mus musculus OX=10090 GN=Slk PE=1 SV=2	Slk	2	2	9	2	141.4	120182	87603.5		115890	78693.3	93320.4	224916	291407	489312	402195	379412	309821	181623	394251	727219	402756	185652	144686
Q8BJS4	SUN domain-containing protein 2 OS=Mus musculus OX=10090 GN=Sun2 PE=1 SV=3	Sun2	32	16	146	16	81.6	2.12105e+07	1.73072e+07	4.0892e+07	2.1429e+07	1.4685e+07	1.8574e+07	1.89299e+07	2.38998e+07	2.19471e+07	2.39841e+07	1.4293e+07	2.80472e+07	1.67819e+07	1.63096e+07	2.21617e+07	1.89047e+07	1.95576e+07	2.27868e+07
Q8CI59	Metalloreductase STEAP3 OS=Mus musculus OX=10090 GN=Steap3 PE=1 SV=1	Steap3	4	2	14	2	54.7	2.84276e+06	2.32165e+06	1.49904e+06	1.22316e+06	1.30636e+06	1.19489e+06	1.13404e+06	739773	1.51637e+06	687348	908562	1.16664e+06	1.07295e+06	786873	855328	807453	1.02963e+06	2.1069e+06
Q1XH17	Tripartite motif-containing protein 72 OS=Mus musculus OX=10090 GN=Trim72 PE=1 SV=1	Trim72	65	22	498	22	52.8	1.95349e+08	1.93376e+08	1.67482e+08	1.80272e+08	2.01522e+08	1.36178e+08	1.31556e+08	1.79972e+08	2.33393e+08	2.00186e+08	1.92252e+08	2.01988e+08	1.61855e+08	1.56913e+08	1.60693e+08	1.82488e+08	1.77086e+08	1.63707e+08
O89023	Tripeptidyl-peptidase 1 OS=Mus musculus OX=10090 GN=Tpp1 PE=1 SV=2	Tpp1	7	3	48	3	61.3	2.67529e+06	1.99863e+06	1.59822e+06	1.28554e+06	1.33533e+06	2.22185e+06	2.34838e+06	2.40781e+06	3.74581e+06	3.20246e+06	2.40727e+06	3.71825e+06	4.3719e+06	2.85273e+06	3.23346e+06	2.92685e+06	2.5949e+06	2.81791e+06
Q91ZE0	Trimethyllysine dioxygenase, mitochondrial OS=Mus musculus OX=10090 GN=Tmlhe PE=1 SV=2	Tmlhe	2	1	6	1	49.6
Q80U95	Ubiquitin-protein ligase E3C OS=Mus musculus OX=10090 GN=Ube3c PE=1 SV=2	Ube3c	5	4	13	4	123.9	294644	322644	220405	381831	463533	271728	433951	528518	628210	713270	148481	471892	422265	658932	503792	96443.2	633537	577296
Q91ZJ5	UTP--glucose-1-phosphate uridylyltransferase OS=Mus musculus OX=10090 GN=Ugp2 PE=1 SV=3	Ugp2	48	22	424	22	56.9	2.199e+08	1.90225e+08	1.53031e+08	1.85592e+08	2.01581e+08	1.70999e+08	1.7827e+08	1.7568e+08	2.08305e+08	2.09166e+08	1.49949e+08	2.54119e+08	2.1059e+08	2.25671e+08	1.60925e+08	2.11256e+08	1.8954e+08	1.69509e+08
Q8R2Y8	Peptidyl-tRNA hydrolase 2, mitochondrial OS=Mus musculus OX=10090 GN=Ptrh2 PE=1 SV=1	Ptrh2	28	3	33	3	19.5	1.57338e+06	2.16346e+06	1.62634e+06	3.10186e+06	2.56283e+06	2.13512e+06	1.72425e+06	1.49412e+06	2.17999e+06	3.74894e+06	2.9388e+06	3.74387e+06	1.82538e+06	3.24642e+06	1.90405e+06	1.42074e+06	2.49109e+06	2.93008e+06
Q8VDM4	26S proteasome non-ATPase regulatory subunit 2 OS=Mus musculus OX=10090 GN=Psmd2 PE=1 SV=1	Psmd2	42	31	382	31	100.1	4.31119e+07	4.88661e+07	5.07365e+07	5.16583e+07	7.77439e+07	5.28848e+07	5.78913e+07	4.90365e+07	4.75857e+07	5.28582e+07	4.95362e+07	4.07422e+07	4.13305e+07	3.59253e+07	4.62126e+07	3.97014e+07	4.23194e+07	5.68829e+07
Q62203	Splicing factor 3A subunit 2 OS=Mus musculus OX=10090 GN=Sf3a2 PE=1 SV=2	Sf3a2	4	1	5	1	49.9	144145	131323	125257	173443	138220	176816	190654	73081.9	127661	85982.4		73589.9	64276.8	83007.2	211464		116235	162527
Q99JR1	Sideroflexin-1 OS=Mus musculus OX=10090 GN=Sfxn1 PE=1 SV=3	Sfxn1	13	3	5	2	35.6	673904	509914	400185	589140	422283	462264	227467	467674	751544	805525	694782	587934		687213	1.83827e+06	561617	467861	639104
Q6ZWQ7	Signal peptidase complex subunit 3 OS=Mus musculus OX=10090 GN=Spcs3 PE=1 SV=1	Spcs3	9	2	17	2	20.3	896422	619371	508319	902250	857211	953888	804445	932722	783681	1.29014e+06	949657	1.66577e+06	848965	1.12362e+06	1.38404e+06	1.2372e+06	628738	1.09897e+06
Q8BGQ7	Alanine--tRNA ligase, cytoplasmic OS=Mus musculus OX=10090 GN=Aars1 PE=1 SV=1	Aars1	30	23	251	23	106.8	3.03206e+07	2.95485e+07	2.46134e+07	4.07766e+07	2.51849e+07	2.84411e+07	3.16811e+07	3.15733e+07	3.22791e+07	3.11641e+07	2.83326e+07	3.92681e+07	3.11887e+07	3.6081e+07	3.46091e+07	3.53922e+07	3.02546e+07	3.42624e+07
Q3U2A8	Valine--tRNA ligase, mitochondrial OS=Mus musculus OX=10090 GN=Vars2 PE=1 SV=2	Vars2	1	1	7	1	118.4	93906.7	75186.9			93480		297254	151229	187395	171075	189662	147071	150736		182923	358719	261727	140813
Q62348	Translin OS=Mus musculus OX=10090 GN=Tsn PE=1 SV=1	Tsn	25	4	50	4	26.2	2.7778e+06	3.21186e+06	1.56752e+06	2.72084e+06	3.43746e+06	2.38433e+06	1.91964e+06	2.81358e+06	3.04251e+06	3.36779e+06	2.08371e+06	4.11135e+06	2.53604e+06	3.23093e+06	3.07839e+06	2.61444e+06	3.55156e+06	3.56073e+06
P35441	Thrombospondin-1 OS=Mus musculus OX=10090 GN=Thbs1 PE=1 SV=1	Thbs1	3	1	9	1	129.6	81983.8			195304	153765		152972					141077			142146	135272
P61079	Ubiquitin-conjugating enzyme E2 D3 OS=Mus musculus OX=10090 GN=Ube2d3 PE=1 SV=1	Ube2d3	41	4	60	1	16.7	1.22069e+07	1.51763e+07	1.10672e+07	1.16644e+07	1.01336e+07	1.64583e+07	1.28691e+07	1.23023e+07	8.13967e+06	1.01232e+07	9.5652e+06	1.08155e+07	9.62514e+06	1.08376e+07	1.38712e+07	1.30944e+07	1.7429e+07	9.49746e+06
P62196	26S proteasome regulatory subunit 8 OS=Mus musculus OX=10090 GN=Psmc5 PE=1 SV=1	Psmc5	51	16	202	15	45.6	2.63091e+07	2.37378e+07	3.3431e+07	3.2105e+07	3.62713e+07	2.19477e+07	2.35974e+07	2.45668e+07	3.20193e+07	2.39374e+07	2.33142e+07	2.21302e+07	1.80238e+07	2.61561e+07	2.88889e+07	2.25612e+07	2.72224e+07	2.68985e+07
Q8VDQ1	Prostaglandin reductase 2 OS=Mus musculus OX=10090 GN=Ptgr2 PE=1 SV=2	Ptgr2	15	4	47	4	38	4.43195e+06	3.12213e+06	3.01411e+06	5.16951e+06	5.7988e+06	3.02483e+06	4.14719e+06	2.95398e+06	6.06753e+06	4.61133e+06	3.22678e+06	3.47625e+06	3.76721e+06	3.77071e+06	4.30033e+06	3.8021e+06	4.91474e+06	3.71509e+06
Q9D1P0	39S ribosomal protein L13, mitochondrial OS=Mus musculus OX=10090 GN=Mrpl13 PE=1 SV=1	Mrpl13	39	5	24	5	20.7	1.2911e+06	456695	886024	644158	2.4615e+06	1.67369e+06	517560	1.12172e+06	1.265e+06	1.70112e+06	1.17479e+06	1.27851e+06	1.4246e+06	631839	1.03241e+06	1.66289e+06	1.84014e+06	351771
Q99J77	Sialic acid synthase OS=Mus musculus OX=10090 GN=Nans PE=1 SV=1	Nans	13	3	21	3	40	1.88819e+06	2.02589e+06	725174	1.76456e+06	1.44379e+06	1.38323e+06	993843	1.14271e+06	2.31093e+06	1.78002e+06	1.6384e+06	2.14521e+06		2.18632e+06	1.36365e+06	675259	993957	1.10218e+06
Q8BTI8	Serine/arginine repetitive matrix protein 2 OS=Mus musculus OX=10090 GN=Srrm2 PE=1 SV=3	Srrm2	0	1	13	1	294.7	104124	108600	80447.6	109895	110967	92563.5	232509	172007	267470	187623		130187	155791	244279	400560	197826	187394	140587
Q9WTX5	S-phase kinase-associated protein 1 OS=Mus musculus OX=10090 GN=Skp1 PE=1 SV=3	Skp1	48	6	82	6	18.7	5.67986e+06	7.59179e+06	6.6494e+06	8.49685e+06	1.12208e+07	7.13154e+06	5.84781e+06	8.67925e+06	6.76662e+06	7.37955e+06	6.36684e+06	7.20606e+06	5.10425e+06	7.52636e+06	8.18281e+06	4.68022e+06	7.43223e+06	7.10089e+06
Q8BYH7	TBC1 domain family member 17 OS=Mus musculus OX=10090 GN=Tbc1d17 PE=1 SV=2	Tbc1d17	5	2	5	2	72.8
Q6IRU2	Tropomyosin alpha-4 chain OS=Mus musculus OX=10090 GN=Tpm4 PE=1 SV=3	Tpm4	59	16	943	12	28.5	1.6334e+07	1.43032e+07	1.34539e+07	1.91097e+07	2.81353e+07	1.22882e+07	1.54298e+07	1.40269e+07	2.15021e+07	1.66523e+07	1.15631e+07	1.50927e+07	1.25776e+07	1.31548e+07	2.10049e+07	1.15982e+07	1.55265e+07	1.67047e+07
Q9ER41	Torsin-1B OS=Mus musculus OX=10090 GN=Tor1b PE=1 SV=2	Tor1b	10	2	12	2	37.8	523498	763204	575391	850010	427477	300201	1.10853e+06	961790	840558	480680	915628	682953	1.06243e+06	598248	491413	278859	374476	411327
P49813	Tropomodulin-1 OS=Mus musculus OX=10090 GN=Tmod1 PE=1 SV=2	Tmod1	46	12	171	12	40.4	4.62479e+07	4.48848e+07	3.41255e+07	3.50364e+07	2.71951e+07	2.52457e+07	3.48907e+07	3.37897e+07	2.73608e+07	3.21761e+07	3.94456e+07	4.15236e+07	3.3542e+07	4.5545e+07	3.5862e+07	3.96097e+07	4.09263e+07	3.49361e+07
Q6A4J8	Ubiquitin carboxyl-terminal hydrolase 7 OS=Mus musculus OX=10090 GN=Usp7 PE=1 SV=1	Usp7	3	3	34	3	128.4	714874	1.11641e+06	381810	809902	538211	633429	448655	420635	458159	440340	444860	524151	509540	721647	892048	641998	432797	739616
Q99K23	Ufm1-specific protease 2 OS=Mus musculus OX=10090 GN=Ufsp2 PE=1 SV=1	Ufsp2	13	4	41	4	52.5	690053	597933	412088	226458	691401	685598	664927	692961	821838	592621	739741	695401	572842	904759	852627	562275	537793	813864
Q8R2Q4	Ribosome-releasing factor 2, mitochondrial OS=Mus musculus OX=10090 GN=Gfm2 PE=1 SV=2	Gfm2	9	5	27	5	86.1	2.77206e+06	2.40226e+06	2.15269e+06	3.59273e+06	5.47031e+06	2.80662e+06	3.55935e+06	2.98481e+06	4.53153e+06	3.56574e+06	1.89029e+06	3.47905e+06	3.4076e+06	3.33393e+06	2.93395e+06	2.77702e+06	2.86674e+06	3.40412e+06
P62754	40S ribosomal protein S6 OS=Mus musculus OX=10090 GN=Rps6 PE=1 SV=1	Rps6	15	3	40	3	28.7	2.63051e+06	3.74627e+06	3.03638e+06	2.5636e+06	3.32712e+06	3.1557e+06	3.54149e+06	4.86226e+06	6.96891e+06	3.26539e+06	4.89263e+06	2.44143e+06	4.81227e+06	2.42333e+06	7.14204e+06	5.66058e+06	3.52967e+06	4.10489e+06
P27048	Small nuclear ribonucleoprotein-associated protein B OS=Mus musculus OX=10090 GN=Snrpb PE=1 SV=1	Snrpb	12	3	49	3	23.6	4.47447e+06	4.59394e+06	3.32612e+06	5.48754e+06	6.00979e+06	3.11152e+06	4.3779e+06	3.71426e+06	6.46945e+06	4.37881e+06	3.92288e+06	3.59867e+06	2.55747e+06	3.75254e+06	6.91028e+06	4.38782e+06	3.53433e+06	5.36873e+06
P62082	40S ribosomal protein S7 OS=Mus musculus OX=10090 GN=Rps7 PE=2 SV=1	Rps7	36	4	41	4	22.1	2.04688e+06	2.82244e+06	1.02776e+07	8.5198e+06	2.33551e+06	1.16638e+07	9.81955e+06	3.54777e+06	7.73577e+06	7.02334e+06	4.04398e+06	2.60827e+06	2.97026e+06	9.44865e+06	1.20595e+07	5.40326e+06	4.0585e+06	4.94131e+06
Q9D7H3	RNA 3'-terminal phosphate cyclase OS=Mus musculus OX=10090 GN=RtcA PE=1 SV=2	RtcA	7	2	25	2	39.2	1.22985e+06	1.07802e+06	1.13977e+06	1.14188e+06	988170	908063	731376	881671	892760	1.25067e+06	1.40501e+06	1.62657e+06	1.41834e+06	1.43268e+06	1.7151e+06	1.46518e+06	1.34459e+06	979197
O70493	Sorting nexin-12 OS=Mus musculus OX=10090 GN=Snx12 PE=1 SV=1	Snx12	21	4	41	3	19.1	668982	1.24529e+07	1.23596e+07	1.07382e+07	629987	9.88636e+06	9.1785e+06	1.14982e+07	918145	1.01796e+07	1.35506e+07	7.94597e+06	1.08153e+07	7.52421e+06	7.17738e+06	6.81475e+06	8.83348e+06	1.15523e+07
P70460	Vasodilator-stimulated phosphoprotein OS=Mus musculus OX=10090 GN=Vasp PE=1 SV=4	Vasp	17	4	18	4	39.6	382866	119702		91584.4	859563	248409	261093	262869	447794	423558	700093	169148	240487	289235	1.86919e+06			404939
Q8BU30	Isoleucine--tRNA ligase, cytoplasmic OS=Mus musculus OX=10090 GN=Iars1 PE=1 SV=2	Iars1	27	25	309	25	144.2	2.30654e+07	2.57965e+07	2.60787e+07	2.65203e+07	2.74767e+07	2.02121e+07	2.28821e+07	2.59334e+07	2.61496e+07	2.75017e+07	2.20954e+07	1.91223e+07	2.04124e+07	2.33237e+07	1.89983e+07	1.83453e+07	2.5487e+07	3.01029e+07
O70306	T-box transcription factor TBX15 OS=Mus musculus OX=10090 GN=Tbx15 PE=1 SV=2	Tbx15	6	2	9	2	65.8	957687	789449	487743	627332	341836	802700	855155	647758	800319	518148	520375	673680	530505	243543	212459	221567	298805	475382
Q8QZZ7	EKC/KEOPS complex subunit Tprkb OS=Mus musculus OX=10090 GN=Tprkb PE=1 SV=1	Tprkb	4	1	18	1	19.5	358977	592421	529303	678224	781480	464378	351394	395849	376471	357845	525052	407207	423455	436236	483108	474581	454243	366037
Q9D2P4	Ubiquitin-related modifier 1 OS=Mus musculus OX=10090 GN=Urm1 PE=1 SV=1	Urm1	15	1	18	1	11.3	249925	435832	156017	392408	235457	330946	305331	274576	336119	318101	168403	182653	162913	172783	194104	200386	463263	288165
Q9CX30	Protein YIF1B OS=Mus musculus OX=10090 GN=Yif1b PE=1 SV=2	Yif1b	12	3	20	3	34	993913	1.16978e+06	705323	156037	170537	1.19943e+06	1.22991e+06	1.19436e+06	1.78214e+06	741861	407007	866329	563521	640077	979988	886406	1.31729e+06	1.27123e+06
Q3UE37	Ubiquitin-conjugating enzyme E2 Z OS=Mus musculus OX=10090 GN=Ube2z PE=1 SV=2	Ube2z	12	4	9	4	38.3	578840	360708	521556	359627	730612	468473	376026	487264	1.13864e+06	1.12281e+06	1.06743e+06	376337	215962	1.06559e+06	772031	388751	974838	1.13869e+06
Q99KC8	von Willebrand factor A domain-containing protein 5A OS=Mus musculus OX=10090 GN=Vwa5a PE=1 SV=2	Vwa5a	25	15	173	15	87.1	1.53879e+07	1.4492e+07	1.38751e+07	1.35373e+07	1.87949e+07	7.72833e+06	9.33537e+06	1.50332e+07	1.81586e+07	1.21659e+07	1.65603e+07	1.25982e+07	1.31347e+07	1.30177e+07	1.83084e+07	1.1316e+07	1.27919e+07	1.72566e+07
Q6P1B1	Xaa-Pro aminopeptidase 1 OS=Mus musculus OX=10090 GN=Xpnpep1 PE=1 SV=1	Xpnpep1	19	11	117	11	69.5	7.9697e+06	7.44402e+06	7.329e+06	8.32734e+06	7.60595e+06	5.94654e+06	6.96133e+06	6.60524e+06	9.46807e+06	8.52259e+06	6.77601e+06	9.46788e+06	7.76552e+06	8.649e+06	9.24839e+06	9.23219e+06	6.80202e+06	8.25639e+06
Q8C2E7	WASH complex subunit 5 OS=Mus musculus OX=10090 GN=Washc5 PE=1 SV=2	Washc5	1	1	12	1	134	310324	285487	252217	278169	345920	171631	169901	188435	267243	238660	195123	209743	173253	215127	338762	255724	169373	293387
Q5IRJ6	Zinc transporter 9 OS=Mus musculus OX=10090 GN=Slc30a9 PE=1 SV=2	Slc30a9	3	2	3	2	62.8	269843	171964	111683	350639	291772	162165	267760	179448	245263	252480	144860	282915	265078	191065	192038	212683	203995	240400
P25688	Uricase OS=Mus musculus OX=10090 GN=Uox PE=1 SV=2	Uox	14	3	5	3	35	89242		577904		545464		3.42412e+06	900094		138920		298759						886865
Q8BX70	Vacuolar protein sorting-associated protein 13C OS=Mus musculus OX=10090 GN=Vps13c PE=1 SV=2	Vps13c	2	4	27	4	419.8	403042	107907			365326	177770	304134	417325	877784	186309	207158	485656		284626	735462	86173.8	185490	508852
Q8VEJ9	Vacuolar protein sorting-associated protein 4A OS=Mus musculus OX=10090 GN=Vps4a PE=1 SV=1	Vps4a	15	5	24	4	48.9	355585	556160	514909	508096	568970	956038	806214	551593	804517	866654	494159	757463	793369	773191	1.03878e+06	420982	978018	921889
Q8CHK3	Lysophospholipid acyltransferase 7 OS=Mus musculus OX=10090 GN=Mboat7 PE=1 SV=1	Mboat7	5	2	4	2	53.4	498842	449565	609045	597597	846716	100829	345123	513144	933912	548055	565234	611453	515001	593118	908382	282246	580187	645007
Q6ZQI3	Malectin OS=Mus musculus OX=10090 GN=Mlec PE=1 SV=2	Mlec	27	7	87	7	32.3	7.60822e+06	6.71829e+06	7.57654e+06	7.01826e+06	9.75932e+06	6.92909e+06	6.36194e+06	6.46083e+06	5.83324e+06	6.29318e+06	8.92734e+06	6.62541e+06	7.81562e+06	5.58982e+06	8.57366e+06	5.62978e+06	7.25585e+06	6.67298e+06
Q9QZJ6	Microfibrillar-associated protein 5 OS=Mus musculus OX=10090 GN=Mfap5 PE=1 SV=1	Mfap5	16	3	20	3	18.5	1.34536e+06	1.81031e+06	3866.19	3.34676e+06	5.24462e+06	1.85767e+06	3683005	1.70522e+06	6.48587e+06	3.18018e+06		2.85612e+06	3.16245e+06	1.58367e+06	1.18794e+06	4.16444e+06	3.57745e+06	1.5604e+06
Q9CPU4	Microsomal glutathione S-transferase 3 OS=Mus musculus OX=10090 GN=Mgst3 PE=1 SV=1	Mgst3	34	4	53	4	16.9	5.80003e+06	5.47835e+06	3.84798e+06	6.61524e+06	1.15566e+07	5.92419e+06	3.89088e+06	3.4739e+06	1.18691e+07	7.80161e+06	2.90729e+06	6.41173e+06	7.90766e+06	2.60897e+06	2.49229e+06	3.34966e+06	6.20214e+06	4.83841e+06
O35678	Monoglyceride lipase OS=Mus musculus OX=10090 GN=Mgll PE=1 SV=1	Mgll	36	8	36	8	33.4	2.24937e+06	252620	209469	828821	1.55182e+06	1.2916e+06	1.89315e+06	612419	9.20644e+06	2.01576e+06	125257	3.23198e+06	694989	677178	1.7058e+07	418676	1.09227e+06	749755
Q3TL44	NLR family member X1 OS=Mus musculus OX=10090 GN=Nlrx1 PE=1 SV=1	Nlrx1	16	10	62	10	107.8	3.64546e+06	3.56182e+06	2.2889e+06	3.60251e+06	5.40159e+06	3.60297e+06	2.51687e+06	8.83287e+06	6.78533e+06	6.08892e+06	3.32463e+06	2.1047e+06	5.75078e+06	1.5706e+06	1.4678e+06	3.88242e+06	6.52141e+06	6.79935e+06
Q9ERS2	NADH dehydrogenase [ubiquinone] 1 alpha subcomplex subunit 13 OS=Mus musculus OX=10090 GN=Ndufa13 PE=1 SV=3	Ndufa13	53	6	120	6	16.8	9.3581e+07	7.89514e+07	5.38353e+07	8.20018e+07	9.35635e+07	4.96866e+07	7.21927e+07	5.35366e+07	9.96547e+07	8.56332e+07	4.15725e+07	7.83856e+07	6.13293e+07	4.27011e+07	4.61254e+07	5.5318e+07	6.77063e+07	6.31231e+07
P03893	NADH-ubiquinone oxidoreductase chain 2 OS=Mus musculus OX=10090 GN=Mtnd2 PE=1 SV=2	Mtnd2	8	2	12	2	38.7	1.09094e+06	881589	682305	969894	2.17206e+06	529247	688695		1.70397e+06	1.1577e+06	721335	1.13382e+06	758800	890338			992219	796829
P53395	Lipoamide acyltransferase component of branched-chain alpha-keto acid dehydrogenase complex, mitochondrial OS=Mus musculus OX=10090 GN=Dbt PE=1 SV=2	Dbt	20	9	95	9	53.2	6.94187e+06	7.16942e+06	5.7699e+06	3.60282e+06	1.66342e+07	1.14513e+07	8.55899e+06	1.17926e+07	8.47073e+06	1.6778e+07	9.49735e+06	1.52837e+07	1.246e+07	1.15423e+07	1.22803e+07	1.05732e+07	9.20694e+06	7.58511e+06
Q9ES46	Beta-parvin OS=Mus musculus OX=10090 GN=Parvb PE=1 SV=1	Parvb	8	3	16	3	41.6	2.20995e+06	2.80559e+06	263639	6.32595e+07	5.9168e+07	1.28346e+07	3.55433e+07	3.38598e+07	1.19851e+08	1.07577e+08	2.32292e+06	9.6919e+06	1.8418e+07	7.39668e+06	566455	5.18361e+07	2.64147e+07	1.51055e+07
Q99LX0	Parkinson disease protein 7 homolog OS=Mus musculus OX=10090 GN=Park7 PE=1 SV=1	Park7	68	11	268	11	20	1.46255e+08	1.53608e+08	1.55693e+08	1.45423e+08	1.2431e+08	1.56758e+08	1.64825e+08	1.64195e+08	1.66991e+08	1.31997e+08	1.45968e+08	1.86698e+08	1.41239e+08	1.81462e+08	1.87091e+08	1.8678e+08	1.50194e+08	1.38865e+08
Q7TSV4	Phosphoglucomutase-2 OS=Mus musculus OX=10090 GN=Pgm2 PE=1 SV=1	Pgm2	8	4	10	4	68.7	552818	227964	167066	320848	627263	783296	422852	731260	1.3411e+06	706017	146575	630751	275582	639766	1.32707e+06	558740	525975	636345
Q8VCI5	Peroxisomal biogenesis factor 19 OS=Mus musculus OX=10090 GN=Pex19 PE=1 SV=1	Pex19	25	4	52	4	32.7	2.97573e+06	2.04642e+06	1.67156e+06	2.85183e+06	3.00453e+06	1.25137e+06	2.42709e+06	1.71304e+06	2.509e+06	1.70975e+06	1.82056e+06	1.66918e+06	1.34015e+06	1.65014e+06	2.01625e+06	1.5757e+06	2.34815e+06	1.79649e+06
Q8K358	Phosphatidylinositol glycan anchor biosynthesis class U protein OS=Mus musculus OX=10090 GN=Pigu PE=1 SV=4	Pigu	3	1	3	1	49.8	406595	393310			389178	427379	275598	184231	640898		408884	312482	237033	199939	411352		441502	489584
P16331	Phenylalanine-4-hydroxylase OS=Mus musculus OX=10090 GN=Pah PE=1 SV=4	Pah	7	3	3	3	51.9		97941.1	258221	216000	190018		2.0462e+06	112320	163431			284860	597043		189006	263998
Q8C3X8	Lipase maturation factor 2 OS=Mus musculus OX=10090 GN=Lmf2 PE=1 SV=1	Lmf2	3	1	7	1	79.9	237326	292720	214297	217668	344845	225915			247091	157290						256672
Q5FW52	Muscular LMNA-interacting protein OS=Mus musculus OX=10090 GN=Mlip PE=1 SV=1	Mlip	16	3	29	3	29.4	1.90869e+06	1.238e+06	1.03863e+06	1.5274e+06	1.37779e+06	1.38139e+06	1.47779e+06	1.11006e+06	2.3074e+06	1.98477e+06	1.67976e+06	2.06607e+06	1.42108e+06	1.94603e+06	1.62456e+06	1.41544e+06	1.76102e+06	1.11698e+06
P63085	Mitogen-activated protein kinase 1 OS=Mus musculus OX=10090 GN=Mapk1 PE=1 SV=3	Mapk1	43	12	113	8	41.2	8.06056e+06	7.14519e+06	6.79542e+06	4.60024e+07	8.44842e+06	7.23977e+06	5.79495e+06	9.65195e+06	6.01966e+06	6.36515e+06	8.40722e+06	6.75095e+06	4.43105e+07	5.24711e+07	1.35736e+07	1.32812e+07	1.00861e+07	1.46593e+07
Q9DC70	NADH dehydrogenase [ubiquinone] iron-sulfur protein 7, mitochondrial OS=Mus musculus OX=10090 GN=Ndufs7 PE=1 SV=1	Ndufs7	39	7	112	7	24.7	4.3851e+07	3.71268e+07	2.42319e+07	4.92801e+07	6.52713e+07	3.1926e+07	3.57772e+07	3.01629e+07	5.9897e+07	4.24145e+07	2.72942e+07	5.23013e+07	3.92363e+07	2.82117e+07	3.18902e+07	2.85967e+07	3.38501e+07	2.59183e+07
Q8VI63	MOB kinase activator 2 OS=Mus musculus OX=10090 GN=Mob2 PE=1 SV=1	Mob2	8	2	32	2	26.8	2.52731e+06	2.77685e+06	2.04421e+06	2.00476e+06	1.50027e+06	2.02788e+06	1.9169e+06	2.85197e+06	4.77444e+06	2.19148e+06	2.23949e+06	2.83215e+06	1.59668e+06	2.32951e+06	2.54319e+06	2.38937e+06	3.08836e+06	3.02069e+06
Q8VCM5	Mitochondrial ubiquitin ligase activator of NFKB 1 OS=Mus musculus OX=10090 GN=Mul1 PE=1 SV=2	Mul1	6	1	10	1	39.8	479416	236805	228838	434379	558089	312673	191624	237544	246265	274916	199818	272284	243617	481040		270614	332123	330007
Q8R2Y2	Cell surface glycoprotein MUC18 OS=Mus musculus OX=10090 GN=Mcam PE=1 SV=1	Mcam	5	3	9	3	71.5	1.08972e+06	737569	1.0716e+06	867678	1.39449e+06	453333	245516	733292	1.3015e+06	840633	763606	1.05219e+06	720919	516452	1.95523e+06	884524	784824	652809
Q91WB2	Inactive phospholipid phosphatase 7 OS=Mus musculus OX=10090 GN=Plpp7 PE=1 SV=1	Plpp7	10	1	8	1	29.7	164748	262096		212705		131950	180235		192008
Q8BG51	Mitochondrial Rho GTPase 1 OS=Mus musculus OX=10090 GN=Rhot1 PE=1 SV=1	Rhot1	10	5	22	4	72.2	5.75211e+06	5.86024e+06	5.58963e+06	6.53101e+06	8.55965e+06	5.31352e+06	5.45522e+06	5.33707e+06	7.78236e+06	5.30737e+06	5.35132e+06	6.44374e+06	5.22873e+06	6.49395e+06	1.41326e+06	7.07649e+06	5.82783e+06	6.34204e+06
Q8CAQ8	MICOS complex subunit Mic60 OS=Mus musculus OX=10090 GN=Immt PE=1 SV=1	Immt	50	32	631	32	83.8	2.13018e+08	1.33553e+08	1.15033e+08	1.33942e+08	1.86571e+08	1.36826e+08	1.41846e+08	1.22612e+08	2.24419e+08	1.71639e+08	1.17975e+08	2.2651e+08	1.58954e+08	1.49139e+08	1.51855e+08	1.59031e+08	1.68736e+08	1.35081e+08
Q9D273	Corrinoid adenosyltransferase OS=Mus musculus OX=10090 GN=Mmab PE=1 SV=1	Mmab	8	2	7	2	26.3	1.62526e+07	3.34867e+07	3.28167e+07	5.09579e+07	4.32443e+07	4.56698e+07	34427380	3.72301e+07	2.49233e+07	2.85922e+07	3.78333e+07	3.37183e+07	3.32856e+07	3.88184e+07	2.33065e+07	2.76568e+07	4.11413e+07	3.13873e+07
Q9EQ20	Methylmalonate-semialdehyde dehydrogenase [acylating], mitochondrial OS=Mus musculus OX=10090 GN=Aldh6a1 PE=1 SV=1	Aldh6a1	46	20	356	20	57.9	7.5956e+07	5.78952e+07	4.99914e+07	5.7993e+07	7.67341e+07	6.04488e+07	7.18293e+07	6.77491e+07	9.20052e+07	7.90607e+07	5.21078e+07	7.66999e+07	7.2923e+07	6.26176e+07	1.09067e+08	7.20988e+07	8.05609e+07	7.15449e+07
Q3URS9	Mitochondrial potassium channel OS=Mus musculus OX=10090 GN=Ccdc51 PE=1 SV=1	Ccdc51	7	3	29	3	45.1	366459	304449	314012	413176	582179	546513	490443	769005	1.39598e+06	575749	564827	454262	302755	343416	435801	632175	377447	384524
Q9CQ86	Migration and invasion enhancer 1 OS=Mus musculus OX=10090 GN=Mien1 PE=1 SV=1	Mien1	10	1	3	1	12.3		389065		94444.4	70748.6	363216	153605		718102	438743	257520	362958	94657.9		991943
P51667	Myosin regulatory light chain 2, ventricular/cardiac muscle isoform OS=Mus musculus OX=10090 GN=Myl2 PE=1 SV=3	Myl2	65	11	328	9	18.9	1.045e+08	1.16645e+08	1.06316e+08	4.05494e+08	3.75104e+08	1.69353e+08	2.51932e+08	2.24448e+08	5.33644e+08	5.46482e+08	1.02456e+08	1.33445e+08	2.06229e+08	1.52272e+08	6.81857e+07	4.26922e+08	2.29623e+08	1.53827e+08
Q91VS7	Microsomal glutathione S-transferase 1 OS=Mus musculus OX=10090 GN=Mgst1 PE=1 SV=3	Mgst1	19	2	18	2	17.5			262656	44900	2.3549e+06	83417.6	4.24614e+06	1.54435e+06	5.8343e+06			1.6441e+06		504185	9.5181e+06		1.31303e+06	2.64761e+06
Q9DC61	Mitochondrial-processing peptidase subunit alpha OS=Mus musculus OX=10090 GN=Pmpca PE=1 SV=1	Pmpca	28	12	99	12	58.2	6.39921e+06	5.94673e+06	5.18983e+06	6.06331e+06	8.46733e+06	5.45801e+06	7.05938e+06	4.75858e+06	8.23258e+06	4.71957e+06	3.79267e+06	4.78086e+06	4.62534e+06	1.96737e+06	6.80732e+06	3.32712e+06	3.99986e+06	7.81599e+06
Q9CQT1	Methylthioribose-1-phosphate isomerase OS=Mus musculus OX=10090 GN=Mri1 PE=1 SV=1	Mri1	25	6	73	6	39.4	1.55594e+07	1.28518e+07	1.41941e+07	1.71951e+07	1.45407e+07	1.43304e+07	1.31966e+07	1.29647e+07	1.08868e+07	1.21285e+07	1.41971e+07	1.69672e+07	1.42681e+07	1.72051e+07	1.19965e+07	1.5163e+07	1.59e+07	1.14767e+07
Q60605	Myosin light polypeptide 6 OS=Mus musculus OX=10090 GN=Myl6 PE=1 SV=3	Myl6	63	10	207	7	16.9	2.37869e+07	1.56397e+07	1.38743e+07	1.67675e+07	2.2962e+07	1.04378e+07	1.63051e+07	1.78987e+07	2.60964e+07	1.8353e+07	1.60928e+07	2.05706e+07	1.53558e+07	1.83835e+07	4.10444e+07	1.77755e+07	1.68494e+07	1.84564e+07
P03911	NADH-ubiquinone oxidoreductase chain 4 OS=Mus musculus OX=10090 GN=Mtnd4 PE=1 SV=1	Mtnd4	14	5	84	5	51.8	2.85393e+07	1.92847e+07	1.38369e+07	1.96638e+07	3.67098e+07	2.38269e+07	2.3239e+07	1.42153e+07	4.33093e+07	2.69678e+07	1.5127e+07	4.14631e+07	2.10614e+07	2.27269e+07	3.34737e+07	2.13593e+07	1.87117e+07	1.98847e+07
Q9JI46	Diphosphoinositol polyphosphate phosphohydrolase 1 OS=Mus musculus OX=10090 GN=Nudt3 PE=1 SV=1	Nudt3	20	4	43	3	19	1.57062e+06	2.2841e+06	1.6346e+06	1.83454e+06	2.26299e+06	1.97832e+06	254740	1.7613e+06	2.98818e+06	1.27401e+06	2.3277e+06	3.22728e+06	1.28745e+06	2.66641e+06	3.68839e+06	2.78847e+06	2.89174e+06	2.2219e+06
P35487	Pyruvate dehydrogenase E1 component subunit alpha, testis-specific form, mitochondrial OS=Mus musculus OX=10090 GN=Pdha2 PE=1 SV=1	Pdha2	8	1	1	1	43.4
O55234	Proteasome subunit beta type-5 OS=Mus musculus OX=10090 GN=Psmb5 PE=1 SV=3	Psmb5	26	6	100	6	28.5	9.70473e+07	9.18331e+07	9.70043e+07	9.29134e+07	4.84637e+07	8.77796e+07	9.75755e+07	1.01577e+08	6.58138e+07	1.01532e+08	1.19802e+08	1.09292e+08	1.15876e+08	1.35995e+08	1.21012e+08	1.37042e+08	1.0727e+08	1.26074e+08
Q9D0B6	Protein PBDC1 OS=Mus musculus OX=10090 GN=Pbdc1 PE=1 SV=1	Pbdc1	10	2	2	2	22.2	287879	159233	196772		253316	371548	352596	263174	328276		384316	430218	212448		270693	338340		228184
Q61171	Peroxiredoxin-2 OS=Mus musculus OX=10090 GN=Prdx2 PE=1 SV=3	Prdx2	61	9	152	9	21.8	1.05765e+08	8.38033e+07	1.12802e+08	9.06001e+07	1.27862e+08	9.46639e+07	95689339	1.0116e+08	1.11035e+08	1.3171e+08	9.23783e+07	8.76893e+07	8.84156e+07	8.82743e+07	9.97408e+07	8.6549e+07	9.59743e+07	8.43051e+07
Q922R8	Protein disulfide-isomerase A6 OS=Mus musculus OX=10090 GN=Pdia6 PE=1 SV=3	Pdia6	17	7	59	7	48.1	6.62624e+06	9.7067e+06	6.5521e+06	7.17777e+06	1.10805e+07	5.87899e+06	8.13226e+06	9.60261e+06	9.34207e+06	8.44564e+06	8.55438e+06	7.59316e+06	6.67167e+06	6.23253e+06	1.13327e+07	7.10484e+06	7.99334e+06	7.17537e+06
Q91VA6	Polymerase delta-interacting protein 2 OS=Mus musculus OX=10090 GN=Poldip2 PE=1 SV=1	Poldip2	7	2	20	2	41.8	1.13072e+06	617574	381494	1.23224e+06	1.72349e+06	708535	716375	563443	921825	571857	253246	360658	416620	619848	297183	752809	858103	410532
O08709	Peroxiredoxin-6 OS=Mus musculus OX=10090 GN=Prdx6 PE=1 SV=3	Prdx6	62	10	191	10	24.9	5.76837e+07	5.00084e+07	4.93893e+07	5.82494e+07	8.28646e+07	3.4741e+07	4.97054e+07	3.80482e+07	6.89211e+07	4.58656e+07	3.17548e+07	4.58588e+07	3.93819e+07	3.36806e+07	5.55483e+07	3.952e+07	4.85195e+07	4.01074e+07
P49722	Proteasome subunit alpha type-2 OS=Mus musculus OX=10090 GN=Psma2 PE=1 SV=3	Psma2	26	5	57	5	25.9	8.5655e+06	1.09586e+07	1.17018e+07	9.91423e+06	1.35832e+07	7.89003e+06	9.22584e+06	1.08082e+07	8.46386e+06	9.83461e+06	8.53931e+06	8.43321e+06	8.44545e+06	1.15628e+07	1.05009e+07	1.17013e+07	1.12265e+07	1.15477e+07
Q9JK42	[Pyruvate dehydrogenase (acetyl-transferring)] kinase isozyme 2, mitochondrial OS=Mus musculus OX=10090 GN=Pdk2 PE=1 SV=2	Pdk2	33	11	167	10	46	4.25217e+07	2.18888e+07	1.95119e+07	2.79402e+07	4.04056e+07	1.99165e+07	2.39074e+07	2.06666e+07	3.3451e+07	2.81246e+07	1.71145e+07	3.58743e+07	2.10865e+07	1.37256e+07	1.47061e+07	1.97624e+07	2.81267e+07	2.18759e+07
P56812	Programmed cell death protein 5 OS=Mus musculus OX=10090 GN=Pdcd5 PE=1 SV=3	Pdcd5	37	4	52	4	14.3	8.2245e+06	7.97231e+06	8.61059e+06	8.36579e+06	7.7618e+06	8.48749e+06	7.11234e+06	9.0978e+06	5.78106e+06	8.50016e+06	5.58877e+06	4.78893e+06	8.19961e+06	5.85686e+06	5.49202e+06	5.13542e+06	4.77437e+06	5.41852e+06
Q8C129	Leucyl-cystinyl aminopeptidase OS=Mus musculus OX=10090 GN=Lnpep PE=1 SV=1	Lnpep	13	8	68	8	117.2	4.07938e+06	3.91525e+06	2.33051e+06	4.17262e+06	4.47309e+06	2.93813e+06	3.77312e+06	3.38291e+06	4.34468e+06	3.3592e+06	2.5826e+06	2.62222e+06	1.84557e+06	2.21852e+06	3.95693e+06	3.22218e+06	3.38183e+06	3.03775e+06
Q8BHE8	m-AAA protease-interacting protein 1, mitochondrial OS=Mus musculus OX=10090 GN=Maip1 PE=1 SV=1	Maip1	8	2	14	2	33	497611	1.11427e+06	326602	1.31756e+06	1.62922e+06	1.36471e+06	1.16865e+06	1.18346e+06	1.45473e+06	1.11192e+06	914442	1.10466e+06	1.15004e+06	1.05754e+06	1.0842e+06	1.17075e+06	834218	702621
Q9DCS3	Enoyl-[acyl-carrier-protein] reductase, mitochondrial OS=Mus musculus OX=10090 GN=Mecr PE=1 SV=2	Mecr	20	6	34	6	40.3	1.25758e+06	1.08125e+06	694414	525850	1.78297e+06	378911	860591	469988	1.78457e+06	838894	618464	445484	533718	318353	1.92636e+06	935091	1.19187e+06	1.38361e+06
P19258	Protein Mpv17 OS=Mus musculus OX=10090 GN=Mpv17 PE=1 SV=1	Mpv17	13	1	1	1	19.7				241138
P70236	Dual specificity mitogen-activated protein kinase kinase 6 OS=Mus musculus OX=10090 GN=Map2k6 PE=1 SV=1	Map2k6	41	11	162	7	37.4	1.63788e+09	2.15831e+09	2.62908e+09	2.61757e+09	1.17998e+09	1.80232e+09	1.97752e+09	1.46153e+09	1.41586e+09	1.88449e+09	2.37043e+09	1.62001e+09	1.58652e+09	1.73828e+09	1.89029e+09	2.17219e+09	1.60695e+09	1.55141e+09
Q9JJW5	Myozenin-2 OS=Mus musculus OX=10090 GN=Myoz2 PE=1 SV=1	Myoz2	69	14	220	14	29.7	4.70457e+07	4.73525e+07	2.17405e+07	9.02877e+07	1.02699e+08	3.64638e+07	4.84363e+07	4.17471e+07	1.07101e+08	8.64081e+07	2.68427e+07	3.90533e+07	5.15741e+07	4.30436e+07	3.76832e+07	7.88317e+07	6.02318e+07	3.78605e+07
Q9CQ75	NADH dehydrogenase [ubiquinone] 1 alpha subcomplex subunit 2 OS=Mus musculus OX=10090 GN=Ndufa2 PE=1 SV=3	Ndufa2	47	5	109	5	10.9	3.62762e+07	2.70612e+07	2.6583e+07	3.84313e+07	4.99294e+07	3.70619e+07	3.63002e+07	2.29398e+07	3.69712e+07	3.29048e+07	2.3196e+07	4.75667e+07	3.66265e+07	3.18217e+07	2.77314e+07	3.20772e+07	3.18873e+07	2.60077e+07
A2AIL4	NADH dehydrogenase (ubiquinone) complex I, assembly factor 6 OS=Mus musculus OX=10090 GN=Ndufaf6 PE=1 SV=1	Ndufaf6	20	4	56	4	38.3	1.55188e+06	1.57931e+06	1.3803e+06	2.04877e+06	2.45781e+06	1.22548e+06	1.03921e+06	1.15649e+06	1.17897e+06	1.63528e+06	1.02249e+06	1.80637e+06	1.36946e+06	1.57253e+06	614846	685483	1.51881e+06	1.57031e+06
Q9CQC7	NADH dehydrogenase [ubiquinone] 1 beta subcomplex subunit 4 OS=Mus musculus OX=10090 GN=Ndufb4 PE=1 SV=3	Ndufb4	9	1	46	1	15.1	1.77328e+07	5.88885e+06	4.88183e+06	3.12026e+06	1.23539e+07	5.31564e+06	4.55187e+06	5.8001e+06	9.14452e+06	7.26929e+06	5.70541e+06	1.0327e+07	4.66643e+06	7.321e+06	6.059e+06	6.94327e+06	1.11132e+07	1.00955e+07
P53612	Geranylgeranyl transferase type-2 subunit beta OS=Mus musculus OX=10090 GN=Rabggtb PE=1 SV=2	Rabggtb	16	4	31	4	37.8	2.1437e+06	1.84977e+06	1.88007e+06	2.73481e+06	3.90023e+06	2.24165e+06	2.53273e+06	1.13901e+06	1.59712e+06	1.59116e+06	1.94379e+06	3.0402e+06	2.71067e+06	2.01269e+06	1.83072e+06	2.68211e+06	3.29841e+06	2.76476e+06
Q9D0W5	Peptidyl-prolyl cis-trans isomerase-like 1 OS=Mus musculus OX=10090 GN=Ppil1 PE=1 SV=1	Ppil1	19	2	10	2	18.2	233528	107311		357386	310494	286905	234735	351706			554934	537479	363974	602214	485882	643005	657458	596112
Q9D358	Low molecular weight phosphotyrosine protein phosphatase OS=Mus musculus OX=10090 GN=Acp1 PE=1 SV=3	Acp1	29	4	41	4	18.2	5.63928e+06	6.12804e+06	5.19906e+06	5.74861e+06	5.51068e+06	3.98377e+06	5781901	5.51868e+06	6.45282e+06	5.44701e+06	4.37759e+06	4.93196e+06	4.3289e+06	3.08541e+06	4.14642e+06	4.01167e+06	4.29598e+06	4.3668e+06
P16675	Lysosomal protective protein OS=Mus musculus OX=10090 GN=Ctsa PE=1 SV=1	Ctsa	4	1	16	1	53.8	244171	251573	139010	331929	443420	275621	275157	321558	269189	336826	368053	308846	309171	358733	385041	363756	289397	429358
Q99JI4	26S proteasome non-ATPase regulatory subunit 6 OS=Mus musculus OX=10090 GN=Psmd6 PE=1 SV=1	Psmd6	39	17	164	17	45.5	1.20526e+07	1.16767e+07	1.08982e+07	1.1859e+07	1.55138e+07	1.40999e+07	1.44755e+07	1.4495e+07	1.73819e+07	1.39704e+07	1.36294e+07	1.61122e+07	1.5681e+07	1.87414e+07	1.89953e+07	1.85501e+07	1.59712e+07	1.66579e+07
Q6PAV2	Probable E3 ubiquitin-protein ligase HERC4 OS=Mus musculus OX=10090 GN=Herc4 PE=1 SV=2	Herc4	6	4	37	4	118.3	1.30181e+06	938060	789533	1.04409e+06	701742	842852	907595	690527	1.12977e+06	971361	1.04795e+06	1.02811e+06	897466	1.05309e+06	911555	1.03092e+06	1.5014e+06	1.29845e+06
Q61743	ATP-sensitive inward rectifier potassium channel 11 OS=Mus musculus OX=10090 GN=Kcnj11 PE=1 SV=1	Kcnj11	5	2	10	2	43.5	1.88657e+06	1.62977e+06	1.39716e+06	1.55007e+06	1.42371e+06	1.92025e+06	1.57942e+06	762812	530259	898219	1.22606e+06	1.4242e+06	1.58481e+06	1.04954e+06	1.13319e+06	1.5053e+06	1.12538e+06	2.1407e+06
P68404	Protein kinase C beta type OS=Mus musculus OX=10090 GN=Prkcb PE=1 SV=4	Prkcb	7	4	29	1	76.7	527410	880192	541597	635282	180977	865048		1.19644e+06	497121	1.13557e+06	1.73551e+06	798879	1.18205e+06	1.93779e+06	1.57489e+06	1.30112e+06	1.48726e+06	1.69748e+06
Q91YS8	Calcium/calmodulin-dependent protein kinase type 1 OS=Mus musculus OX=10090 GN=Camk1 PE=1 SV=1	Camk1	10	3	22	3	41.6	1.59592e+06	1.27444e+06	1.08025e+06	1.52297e+06	1.96865e+06	1.31032e+06	1.26292e+06	1.72622e+06	1.62869e+06	1.33691e+06	1.97574e+06	1.10584e+06	1.62215e+06	1.63765e+06	1.18054e+06	1.30786e+06	1.88991e+06	1.31889e+06
P18826	Phosphorylase b kinase regulatory subunit alpha, skeletal muscle isoform OS=Mus musculus OX=10090 GN=Phka1 PE=1 SV=3	Phka1	48	42	650	42	138.7	1.2046e+08	1.39771e+08	1.57823e+08	1.28896e+08	1.03537e+08	1.73213e+08	1.34532e+08	1.55235e+08	1.092e+08	1.51385e+08	1.95713e+08	1.24232e+08	1.61123e+08	1.86437e+08	1.311e+08	1.68271e+08	1.62208e+08	1.8823e+08
P02469	Laminin subunit beta-1 OS=Mus musculus OX=10090 GN=Lamb1 PE=1 SV=3	Lamb1	26	37	457	37	197	1.70063e+08	6.86945e+07	1.24952e+08	1.15354e+08	1.21549e+08	7.50222e+07	1.09592e+08	9.85123e+07	1.22872e+08	1.0013e+08	8.3451e+07	1.04755e+08	5.70973e+07	6.65641e+07	1.21544e+08	9.92921e+07	1.25272e+08	1.08812e+08
P62322	U6 snRNA-associated Sm-like protein LSm5 OS=Mus musculus OX=10090 GN=Lsm5 PE=3 SV=2	Lsm5	22	1	18	1	9.9	374882	479296	359921	527947	532284	271167	286477	269051	596600	428975	349649	293986	273840	329191	402471	312333	313323	310630
P21440	Phosphatidylcholine translocator ABCB4 OS=Mus musculus OX=10090 GN=Abcb4 PE=1 SV=2	Abcb4	1	1	13	1	140.3	378222	283824	282868	463562	511187	230323	240924	277646	428893	336611	281432	299385	239956	268118	231383	219583	318744	304571
Q9QWV4	Myeloid leukemia factor 1 OS=Mus musculus OX=10090 GN=Mlf1 PE=1 SV=1	Mlf1	26	7	71	7	30.4	6.13497e+06	6.34453e+06	5.52778e+06	6.87691e+06	3.09913e+07	5.34923e+06	5.36364e+06	6.24655e+06	7.71978e+06	5.83064e+06	5.31956e+06	5.19535e+06	6.05798e+06	4.59647e+06	2.82142e+06	3.67013e+06	6.12566e+06	5.20423e+06
Q64449	C-type mannose receptor 2 OS=Mus musculus OX=10090 GN=Mrc2 PE=1 SV=3	Mrc2	4	3	25	3	167	981289	968359	360601	477441	1.51339e+06	298100	537730	678185	937213	938978	656658	773727	344473	780932	759255	726930	704231	766745
P46935	E3 ubiquitin-protein ligase NEDD4 OS=Mus musculus OX=10090 GN=Nedd4 PE=1 SV=3	Nedd4	17	12	100	12	102.6	2.98623e+07	2.79334e+07	2.78566e+07	2.54039e+07	3.15329e+07	2.10389e+07	3.79126e+07	2.5949e+07	2.20736e+07	3.06126e+07	2.65239e+07	2.97272e+07	2.9311e+07	3.19466e+07	2.63057e+07	4.32962e+07	2.74661e+07	2.63428e+07
O09046	L-amino-acid oxidase OS=Mus musculus OX=10090 GN=Il4i1 PE=1 SV=1	Il4i1	3	1	4	1	70.1	74302		154787	117163	106564			106593							304567			237568
Q3U3R4	Lipase maturation factor 1 OS=Mus musculus OX=10090 GN=Lmf1 PE=1 SV=1	Lmf1	2	1	4	1	65.8	176647	74094.4	101567	102365	119404	93435.6	155139	146353	304037	178431	136187	308129	276003	213519	257867		193845	171474
Q9WVL0	Maleylacetoacetate isomerase OS=Mus musculus OX=10090 GN=Gstz1 PE=1 SV=1	Gstz1	35	6	60	6	24.3	6.26666e+06	7.16566e+06	4.49028e+06	7.67513e+06	1.09603e+07	5.07486e+06	1.09485e+07	4.91504e+06	1.33872e+07	6.07998e+06	3.18587e+06	8.17376e+06	3.47273e+06	6.95208e+06	1.38812e+07	4.79571e+06	5.79279e+06	5.3224e+06
O08911	Mitogen-activated protein kinase 12 OS=Mus musculus OX=10090 GN=Mapk12 PE=1 SV=1	Mapk12	32	11	175	10	42	1.84962e+07	2.73852e+07	1.21529e+07	2.72142e+07	2.34783e+07	1.70451e+07	1.35279e+07	2.36321e+07	3.16265e+07	2.12501e+07	1.56019e+07	2.44033e+07	2.0596e+07	2.11705e+07	1.31275e+07	1.4239e+07	2.7374e+07	2.02491e+07
Q99KX1	Myeloid leukemia factor 2 OS=Mus musculus OX=10090 GN=Mlf2 PE=1 SV=1	Mlf2	7	1	4	1	28	1.98907e+07	2.58044e+07	3.0629e+07	3.40418e+07	2.28988e+07	1.77832e+07	11948797	1.5823e+07	1.55281e+07	1.73636e+07	1.58502e+07	1.3967e+07	1.75452e+07	1.75044e+07	1.17522e+07	1.72188e+07	1.7557e+07	1.90542e+07
P55002	Microfibrillar-associated protein 2 OS=Mus musculus OX=10090 GN=Mfap2 PE=2 SV=1	Mfap2	5	1	9	1	20.6	974025	575325	512272	620613	1.10487e+06		578614	611842	1.18482e+06	894609	649467	1.00016e+06	776674	749098	2.00102e+06	782238	691378	990867
Q63844	Mitogen-activated protein kinase 3 OS=Mus musculus OX=10090 GN=Mapk3 PE=1 SV=5	Mapk3	18	6	58	2	43	678801	270595	415794		612102	305500	395369	462870	668220	299438	255898	333300	287211	974769	1.45827e+06	529057	446469	387814
Q9D1M4	Eukaryotic translation elongation factor 1 epsilon-1 OS=Mus musculus OX=10090 GN=Eef1e1 PE=1 SV=1	Eef1e1	22	3	31	3	19.8	1.7101e+06	2.23785e+06	1.2539e+06	2.80142e+06	2.84564e+06	1.84707e+06	2.0552e+06	1.54371e+06	1.99892e+06	2.00653e+06	1.86553e+06	1.25149e+06	1.64972e+06	1.20331e+06	467803	1.62526e+06	1.45286e+06	1.90082e+06
O09110	Dual specificity mitogen-activated protein kinase kinase 3 OS=Mus musculus OX=10090 GN=Map2k3 PE=1 SV=2	Map2k3	40	13	161	9	39.3	1.88528e+07	1.56165e+07	1.44458e+07	1.95275e+07	2.1115e+07	1.65178e+07	1.72772e+07	1.78723e+07	2.32074e+07	1.87212e+07	1.74567e+07	1.89839e+07	1.79493e+07	2.15851e+07	1.65489e+07	1.72937e+07	1.98128e+07	1.93903e+07
Q9D1J1	Adaptin ear-binding coat-associated protein 2 OS=Mus musculus OX=10090 GN=Necap2 PE=1 SV=1	Necap2	8	1	1	1	28.6		772212			729882	462344	680491	861012	1.14791e+06	937633		993376						808516
P10493	Nidogen-1 OS=Mus musculus OX=10090 GN=Nid1 PE=1 SV=2	Nid1	44	33	444	33	136.5	6.76519e+07	6.20066e+07	5.68995e+07	6.41224e+07	8.63292e+07	6.37844e+07	6.20445e+07	6.88199e+07	8.27148e+07	6.52517e+07	5.09991e+07	6.59475e+07	6.69031e+07	1.46683e+08	8.16485e+07	7.13516e+07	7.34101e+07	1.1529e+08
Q9Z0J0	NPC intracellular cholesterol transporter 2 OS=Mus musculus OX=10090 GN=Npc2 PE=1 SV=1	Npc2	5	1	7	1	16.4	579514	295413	303066	242087	239540	257278	434674	448655	571769	347329	333032	380683	352222	371013	1.14084e+06	368593	274400	369777
O09111	NADH dehydrogenase [ubiquinone] 1 beta subcomplex subunit 11, mitochondrial OS=Mus musculus OX=10090 GN=Ndufb11 PE=1 SV=2	Ndufb11	38	5	107	5	17.4	3.96173e+07	2.89246e+07	1.81872e+07	3.57408e+07	6.32746e+07	4.30839e+07	4.09017e+07	2.18112e+07	4.54434e+07	4.3328e+07	3.0282e+07	5.30089e+07	5.17955e+07	3.65623e+07	3.6003e+07	3.11642e+07	3.09357e+07	2.72338e+07
Q9CQ48	NudC domain-containing protein 2 OS=Mus musculus OX=10090 GN=Nudcd2 PE=1 SV=1	Nudcd2	7	1	2	1	17.6	353491	412815	345970	447864	1.22601e+06		922000	837788	919832	661385	606899	782285	923346	756158	1.01199e+06	549232	465066	686178
Q63850	Nuclear pore glycoprotein p62 OS=Mus musculus OX=10090 GN=Nup62 PE=1 SV=2	Nup62	5	1	1	1	53.2
Q8R2H9	Phosphoethanolamine/phosphocholine phosphatase OS=Mus musculus OX=10090 GN=Phospho1 PE=1 SV=1	Phospho1	7	2	19	2	29.9	1.09108e+06	1.44375e+06	662965	868785	2.02934e+06	2.5336e+06	1.41312e+06	1.69534e+06	1.57434e+06	1.68201e+06	1.64618e+06	2.37357e+06	1.74768e+06	2.12298e+06	1.22327e+06	1.06849e+06	1.48891e+06	1.26484e+06
O88492	Perilipin-4 OS=Mus musculus OX=10090 GN=Plin4 PE=1 SV=2	Plin4	48	24	268	24	139.3	1.2677e+08	1.45544e+08	1.03399e+08	1.82931e+08	2.00277e+08	2.11112e+08	1.55526e+08	1.49424e+08	1.97577e+08	2.00415e+08	1.32701e+08	1.51902e+08	1.89097e+08	1.61993e+08	1.49673e+08	9.84658e+07	1.66546e+08	1.27951e+08
Q58A65	C-Jun-amino-terminal kinase-interacting protein 4 OS=Mus musculus OX=10090 GN=Spag9 PE=1 SV=2	Spag9	10	11	43	10	146.1	2.80001e+08	2.45718e+08	2.59297e+08	4.34286e+07	3.15033e+08	2.46901e+08	2.58837e+08	2.93387e+08	2.00785e+08	1.86369e+08	2.6486e+08	2.16198e+08	2.67687e+08	4.88304e+08	3.59639e+08	4.23317e+08	2.6644e+08	2.57203e+08
Q9DBC7	cAMP-dependent protein kinase type I-alpha regulatory subunit OS=Mus musculus OX=10090 GN=Prkar1a PE=1 SV=3	Prkar1a	28	11	128	11	43.2	2.50741e+07	1.76334e+07	1.25041e+07	1.43392e+07	2.40461e+07	1.19305e+07	1.52233e+07	1.24822e+07	2.48362e+07	1.48948e+07	8.69101e+06	1.77436e+07	1.44127e+07	1.14383e+07	1.46089e+07	1.30769e+07	1.61023e+07	1.05226e+07
Q71RI9	Kynurenine--oxoglutarate transaminase 3 OS=Mus musculus OX=10090 GN=Kyat3 PE=1 SV=1	Kyat3	7	3	25	2	51.1	388050	1.39245e+06	146682	1.51686e+06	1.534e+06	902172	1.05698e+06	777219	1.0943e+06	884375	578921	1.18781e+06	1.17195e+06	819782	971100	1.06944e+06	442764	875433
Q7TSH2	Phosphorylase b kinase regulatory subunit beta OS=Mus musculus OX=10090 GN=Phkb PE=1 SV=1	Phkb	30	28	353	28	123.8	7.37165e+07	8.59896e+07	8.83247e+07	8.16671e+07	7.36651e+07	1.03434e+08	7.47974e+07	9.90974e+07	7.13782e+07	7.86493e+07	9.7557e+07	8.05176e+07	9.22376e+07	8.21047e+07	7.57656e+07	8.80527e+07	8.55811e+07	1.02476e+08
P06151	L-lactate dehydrogenase A chain OS=Mus musculus OX=10090 GN=Ldha PE=1 SV=3	Ldha	74	25	1621	24	36.5	2.61471e+09	2.86054e+09	2.53366e+09	2.18739e+09	2.02372e+09	2.47482e+09	2.61312e+09	2.54138e+09	2.36384e+09	2.41289e+09	2.90612e+09	2.4507e+09	2.72044e+09	2.65346e+09	2.88979e+09	2.83023e+09	2.57104e+09	2.79225e+09
P51885	Lumican OS=Mus musculus OX=10090 GN=Lum PE=1 SV=2	Lum	32	9	198	9	38.2	1.43198e+08	1.23717e+08	6.7325e+07	6.35396e+07	7.30424e+07	4.89634e+07	5.55344e+07	1.13113e+08	1.58583e+08	7.11207e+07	1.59463e+08	1.06093e+08	6.26491e+07	7.28884e+07	1.58717e+08	6.79932e+07	7.07263e+07	6.51157e+07
Q8BK30	NADH dehydrogenase [ubiquinone] flavoprotein 3, mitochondrial OS=Mus musculus OX=10090 GN=Ndufv3 PE=1 SV=1	Ndufv3	38	3	25	3	11.8	1.10713e+07	1.46336e+06	6.95925e+06	6.78572e+06	1.15572e+07	6.94786e+06	6286647	5.58931e+06	1.8628e+07	8.42099e+06	5.75666e+06	9.03753e+06	1.70847e+06	1.4854e+06	1.40118e+06	1.13387e+06	8.21716e+06	4.55161e+06
Q99KK2	N-acylneuraminate cytidylyltransferase OS=Mus musculus OX=10090 GN=Cmas PE=1 SV=2	Cmas	5	2	4	2	48	761295	764521	600382	527915	906051	637587	630755			380662	337034		518257	276199	686565			681750
Q80XI4	Phosphatidylinositol 5-phosphate 4-kinase type-2 beta OS=Mus musculus OX=10090 GN=Pip4k2b PE=1 SV=1	Pip4k2b	8	3	8	3	47.3	1.97633e+06	2.11121e+06	2.98003e+06	3.2952e+06	3.19692e+06	2.46789e+06	1.80468e+06	2.62669e+06	2.20694e+06	2.14949e+06	2.82132e+06	2.64738e+06	2.66457e+06	2.25771e+06	1.55939e+06	1.91611e+06	2.22742e+06	2.40874e+06
Q9EPR2	Group XIIA secretory phospholipase A2 OS=Mus musculus OX=10090 GN=Pla2g12a PE=1 SV=2	Pla2g12a	8	1	7	1	21.3	157547	54197.6		39040.5	78511.8		114153	93113.3	337509	133487		199639	131046	174556	160767	182351	148112	117601
Q9D517	1-acyl-sn-glycerol-3-phosphate acyltransferase gamma OS=Mus musculus OX=10090 GN=Agpat3 PE=1 SV=2	Agpat3	19	6	66	6	43.3	1.67991e+07	2.44607e+07	1.79845e+07	2.55412e+07	2.73865e+07	2.05418e+07	1.80386e+07	2.11403e+07	2.30544e+07	2.06615e+07	2.16227e+07	2.31035e+07	1.89815e+07	1.26038e+07	1.34186e+07	1.95173e+07	2.05034e+07	1.93033e+07
Q61792	LIM and SH3 domain protein 1 OS=Mus musculus OX=10090 GN=Lasp1 PE=1 SV=1	Lasp1	22	6	64	5	30	2.02216e+07	1.8281e+07	1.84108e+07	1.74952e+07	1.57927e+07	1.88453e+07	1.34072e+07	1.59443e+07	1.83568e+07	1.51013e+07	1.91081e+07	1.99991e+07	1.50248e+07	2.13551e+07	2.10716e+07	1.59353e+07	2.20168e+07	1.80535e+07
Q9D1I5	Methylmalonyl-CoA epimerase, mitochondrial OS=Mus musculus OX=10090 GN=Mcee PE=1 SV=1	Mcee	11	1	7	1	19	3.54578e+06	2.16848e+06	1.12545e+06	2.97934e+06	1.10408e+07	1.2629e+06	1.86669e+06	1.91195e+06	3.53303e+06	2.81675e+06	888729	6.57722e+06	1.53207e+06	1.50139e+06	1.70469e+06	1.37587e+06	2.67771e+06	1.86985e+06
A2AG06	Meiosis-specific coiled-coil domain-containing protein MEIOC OS=Mus musculus OX=10090 GN=Meioc PE=1 SV=1	Meioc	1	1	14	1	108.8	1.63256e+08	2.134e+08	2.78239e+08	2.5244e+08	1.97479e+08	1.29904e+08	1.45408e+08	1.69212e+08	1.179e+08	1.26309e+08	9.60805e+07	1.26079e+08	1.3002e+08	1.70318e+08	1.56906e+08	2.08651e+08	1.10748e+08	1.42455e+08
Q9WVS7	Dual specificity mitogen-activated protein kinase kinase 5 OS=Mus musculus OX=10090 GN=Map2k5 PE=1 SV=1	Map2k5	4	1	6	1	50.1		198129	177401	249156	195028		179452	142071				72138.3	203727		126876			124838
Q9R0E1	Multifunctional procollagen lysine hydroxylase and glycosyltransferase LH3 OS=Mus musculus OX=10090 GN=Plod3 PE=1 SV=1	Plod3	3	1	14	1	84.9	114348	157555	158643	251914	351968	138758	157299	156148	302292	195515	171822		145909	181222	293617
Q3UPH1	Protein PRRC1 OS=Mus musculus OX=10090 GN=Prrc1 PE=1 SV=1	Prrc1	7	2	23	2	46.3	1.32662e+06	1.60854e+06	664450	1.65051e+06	2.46878e+06	889408	1.53557e+06	1.35814e+06	1.62184e+06	1.68038e+06	622301	763091	612440	609051	706144	912614	1.1472e+06	945746
Q8K411	Presequence protease, mitochondrial OS=Mus musculus OX=10090 GN=Pitrm1 PE=1 SV=1	Pitrm1	24	18	125	18	117.3	9.62543e+06	1.00285e+07	5.21151e+06	1.04027e+07	1.02004e+07	1.1163e+07	8.52901e+06	7.89534e+06	1.16193e+07	1.44178e+07	7.49275e+06	1.16454e+07	1.03618e+07	5.66184e+06	9.05062e+06	7.48025e+06	1.10105e+07	9.02873e+06
Q9D1C3	Protein preY, mitochondrial OS=Mus musculus OX=10090 GN=Pyurf PE=1 SV=1	Pyurf	19	1	4	1	12.5	1.46579e+06	1.08136e+06	913203	2.28028e+06	2.02383e+06	1.15631e+06	1.7126e+06	1.33129e+06	1.65911e+06	1.26659e+06	1.30318e+06	1.07092e+06	1.39526e+06	441440	764648	757391	1.12626e+06	791695
Q99J83	Autophagy protein 5 OS=Mus musculus OX=10090 GN=Atg5 PE=1 SV=1	Atg5	7	1	15	1	32.4	456289	504120	488942	649418	670610	301858	427799	250231	511001	347042	404820	360223	361450	328037	455414	275590	249516	338441
Q9EQ06	Estradiol 17-beta-dehydrogenase 11 OS=Mus musculus OX=10090 GN=Hsd17b11 PE=1 SV=1	Hsd17b11	9	2	10	2	32.9	563045	391624		341238	626607	181961	374003	199542	676887	578025	218789	577480		450901	1.11091e+06	207371	282721	817999
Q9R0P5	Destrin OS=Mus musculus OX=10090 GN=Dstn PE=1 SV=3	Dstn	48	9	102	8	18.5	7.33975e+06	4.17111e+06	4.78098e+06	7.12509e+06	9.06379e+06	6.25653e+06	7.59045e+06	7.09055e+06	1.11244e+07	8.01604e+06	7.29653e+06	9.79753e+06	6.1874e+06	5.94459e+06	1.50686e+07	6.4555e+06	7.25864e+06	7.81418e+06
P70168	Importin subunit beta-1 OS=Mus musculus OX=10090 GN=Kpnb1 PE=1 SV=2	Kpnb1	29	19	203	19	97.1	2.01469e+07	1.34468e+07	1.74056e+07	1.5885e+07	1.82919e+07	1.8386e+07	1.84627e+07	1.85003e+07	2.39379e+07	2.21529e+07	1.51989e+07	2.28707e+07	1.77008e+07	2.09616e+07	2.65103e+07	2.39252e+07	1.74576e+07	2.2624e+07
Q91VM9	Inorganic pyrophosphatase 2, mitochondrial OS=Mus musculus OX=10090 GN=Ppa2 PE=1 SV=1	Ppa2	35	8	89	8	38.1	1.2351e+07	9.74883e+06	3.96304e+06	9.75073e+06	1.78918e+07	5.84456e+06	8.04626e+06	3.61667e+06	1.11438e+07	7.7721e+06	3.07291e+06	8.53485e+06	8.30589e+06	4.31064e+06	6.34073e+06	5.81012e+06	7.61513e+06	2.18065e+06
Q8VIM9	Immunity-related GTPase family Q protein OS=Mus musculus OX=10090 GN=Irgq PE=1 SV=1	Irgq	3	2	20	2	59.3	466974	447954	417830	430456	753866	444378	553645	535644	515861	413010	203721	426186	172085	204430	317146	487698	588386	574388
Q8CI70	Leucine-rich repeat-containing protein 20 OS=Mus musculus OX=10090 GN=Lrrc20 PE=1 SV=1	Lrrc20	46	8	112	8	20.8	1.85605e+07	1.7905e+07	1.32271e+07	1.26977e+07	1.40999e+07	1.72523e+07	1.38393e+07	1.63845e+07	1.67776e+07	1.67452e+07	1.57733e+07	1.52243e+07	1.90338e+07	2.2359e+07	2.03787e+07	1.95263e+07	1.97088e+07	1.92206e+07
P59481	VIP36-like protein OS=Mus musculus OX=10090 GN=Lman2l PE=1 SV=1	Lman2l	12	3	23	3	39.9	1.16538e+06	1.07991e+06	882563	1.14054e+06	976460	653985	744840	574189	1.15536e+06	675128	539848	850690	578217	697206	883221	647708	774510	936245
Q9DBH5	Vesicular integral-membrane protein VIP36 OS=Mus musculus OX=10090 GN=Lman2 PE=1 SV=2	Lman2	23	6	35	6	40.4	2.21906e+06	1.39953e+06	1.41631e+06	1.48219e+06	1.77948e+06	1.20509e+06	1.73252e+06	1.89582e+06	2.43013e+06	2.70231e+06	2.37849e+06	1.9932e+06	2.05087e+06	2.44007e+06	3.20345e+06	2.14849e+06	2.39635e+06	2.52488e+06
Q99K48	Non-POU domain-containing octamer-binding protein OS=Mus musculus OX=10090 GN=Nono PE=1 SV=3	Nono	14	6	50	5	54.5	2.57007e+06	2.26631e+06	1.41672e+06	2.2131e+06	2.3191e+06	1.67372e+06	2.1865e+06	1.79462e+06	2.96831e+06	2.2493e+06	1.59443e+06	2.7e+06	2.31864e+06	2.19602e+06	3.98663e+06	2.67361e+06	1.7949e+06	2.52427e+06
P24369	Peptidyl-prolyl cis-trans isomerase B OS=Mus musculus OX=10090 GN=Ppib PE=1 SV=2	Ppib	44	10	158	10	23.7	5.25512e+07	3.51354e+07	2.57439e+07	3.33908e+07	3.24676e+07	3.11184e+07	3.20082e+07	5.35698e+07	5.62045e+07	5.51146e+07	5.71677e+07	8.35934e+07	4.36485e+07	6.80065e+07	6.63913e+07	7.04237e+07	4.65838e+07	4.2139e+07
Q9D0J8	Parathymosin OS=Mus musculus OX=10090 GN=Ptms PE=1 SV=3	Ptms	12	2	2	2	11.4									897298
Q9DCM0	Persulfide dioxygenase ETHE1, mitochondrial OS=Mus musculus OX=10090 GN=Ethe1 PE=1 SV=2	Ethe1	33	5	66	5	27.7	5.89997e+06	4.16349e+06	2.80108e+06	5.03777e+06	6.78441e+06	3.76767e+06	4.92841e+06	3.65578e+06	4.92562e+06	2.99596e+06	3.03354e+06	5.27112e+06	4.21182e+06	3.49381e+06	3.56041e+06	3.72116e+06	3.36784e+06	4.27872e+06
Q7TQ95	Endoplasmic reticulum junction formation protein lunapark OS=Mus musculus OX=10090 GN=Lnpk PE=1 SV=1	Lnpk	20	6	66	6	47.5	8.08782e+06	8.93957e+06	1.08394e+07	1.04909e+07	9.82445e+06	6.44671e+06	8.10819e+06	9.38251e+06	1.36743e+07	7.42063e+06	7.08352e+06	7.68e+06	6.98041e+06	6.02947e+06	1.02922e+07	5.87024e+06	7.66311e+06	8.03351e+06
Q8BJ34	Meiosis regulator and mRNA stability factor 1 OS=Mus musculus OX=10090 GN=Marf1 PE=1 SV=3	Marf1	1	2	10	1	191.9	717399	550205	396337	801046	1.07611e+06	373469	467411	477050	722009	562287	399188	541268	446722	436917	510286	454815	611066	617750
Q9WTU6	Mitogen-activated protein kinase 9 OS=Mus musculus OX=10090 GN=Mapk9 PE=1 SV=2	Mapk9	6	3	39	2	48.2	244439	288205	457215	476335	288258	257716	527071	270426	683742	454458	510378	254149	181107	447243	153275	359142	213031	320413
Q8VEM8	Phosphate carrier protein, mitochondrial OS=Mus musculus OX=10090 GN=Slc25a3 PE=1 SV=1	Slc25a3	46	16	413	16	39.6	2.42738e+08	2.00938e+08	1.65227e+08	2.31847e+08	3.23865e+08	1.96464e+08	1.92141e+08	1.75635e+08	3.17877e+08	2.42022e+08	1.57311e+08	2.99357e+08	2.23695e+08	1.69727e+08	2.5534e+08	2.16805e+08	2.14629e+08	1.70186e+08
Q99JT9	1,2-dihydroxy-3-keto-5-methylthiopentene dioxygenase OS=Mus musculus OX=10090 GN=Adi1 PE=1 SV=1	Adi1	12	2	19	2	21.5	987433	1.83803e+06	1.73654e+06	445833	858718	1.83115e+06	1.76891e+06	1.45868e+06	1.56295e+06	1.98101e+06	1.89294e+06	1.39538e+06	1.81059e+06	988239	1.13549e+06	1.31379e+06	1.63375e+06	1.25386e+06
P04247	Myoglobin OS=Mus musculus OX=10090 GN=Mb PE=1 SV=3	Mb	89	17	828	17	17.1	1.19482e+09	4.96174e+08	1.60904e+08	7.57669e+08	1.47986e+09	4.60471e+08	5.50783e+08	4.2127e+08	1.2355e+09	9.1367e+08	2.03982e+08	1.04999e+09	6.22615e+08	2.90409e+08	2.36008e+08	5.53604e+08	7.39009e+08	3.23813e+08
Q91YP2	Neurolysin, mitochondrial OS=Mus musculus OX=10090 GN=Nln PE=1 SV=1	Nln	10	5	20	5	80.4	2.91598e+06	1.79782e+06	914127	1.34364e+06	1.09611e+06	1.02593e+06	1.78683e+06	851778	2.68911e+06	2.26908e+06	892341	1.03801e+06	1.19774e+06	1.06395e+06	3.08213e+06	1.01192e+06	2.07015e+06	1.97643e+06
Q91XL9	Oxysterol-binding protein-related protein 1 OS=Mus musculus OX=10090 GN=Osbpl1a PE=1 SV=2	Osbpl1a	5	4	26	4	107.7	6.44171e+06	5.66436e+06	4.12547e+06	4.78432e+06	5.27148e+06	4.76946e+06	5.95035e+06	4.91764e+06	8.91938e+06	6.34084e+06	3.15729e+06	8.77178e+06	4.91476e+06	5.56226e+06	5.16837e+06	4.91124e+06	5.57552e+06	4.21341e+06
Q505D7	Optic atrophy 3 protein homolog OS=Mus musculus OX=10090 GN=Opa3 PE=1 SV=1	Opa3	15	3	29	2	20.1	976376	4.40517e+06	3.55362e+06	5.36155e+06	1.47778e+06	1.03256e+07	826692	1.28871e+06	1.29245e+06	1.00728e+06	4.21658e+06	1.078e+06	930949	569457	717999	670747	824183	1.48983e+06
Q9D8W7	OCIA domain-containing protein 2 OS=Mus musculus OX=10090 GN=Ociad2 PE=1 SV=1	Ociad2	6	1	7	1	16.9	252865	169014	284623	175212	353064	382974	307265	233433	269444	277785					428004		251867	350314
Q60597	2-oxoglutarate dehydrogenase, mitochondrial OS=Mus musculus OX=10090 GN=Ogdh PE=1 SV=3	Ogdh	57	51	1232	51	116.4	6.59346e+08	4.96038e+08	3.74708e+08	4.92291e+08	7.39617e+08	4.24498e+08	4.18441e+08	4.16583e+08	5.6882e+08	4.73577e+08	3.46962e+08	5.70276e+08	4.7262e+08	3.6773e+08	3.36443e+08	4.38918e+08	4.9265e+08	4.07621e+08
O55022	Membrane-associated progesterone receptor component 1 OS=Mus musculus OX=10090 GN=Pgrmc1 PE=1 SV=4	Pgrmc1	13	3	9	2	21.7	1.22292e+06	1.59829e+06	1.41424e+06	1.00802e+06	1.2676e+06	1.0177e+06	1.97514e+06	1.91271e+06	1.64222e+06	1.10001e+06	949988	3.04307e+06	1.45785e+06	1.77964e+06	2.63045e+06	1.80601e+06	933551	1.86048e+06
P97298	Pigment epithelium-derived factor OS=Mus musculus OX=10090 GN=Serpinf1 PE=1 SV=2	Serpinf1	26	9	74	8	46.2	7.23699e+06	8.38341e+06	5.73936e+06	1.14121e+07	2.07099e+07	1.01841e+07	1.29877e+07	1.02186e+07	6.49142e+06	1.71518e+07	8.20996e+06	1.18807e+07	7.99117e+06	1.40344e+07	6.52423e+06	1.64445e+07	7.56635e+06	1.75797e+07
P63328	Serine/threonine-protein phosphatase 2B catalytic subunit alpha isoform OS=Mus musculus OX=10090 GN=Ppp3ca PE=1 SV=1	Ppp3ca	28	13	164	8	58.6	1.98968e+07	2.18647e+07	1.78185e+07	1.69756e+07	1.88496e+07	1.93863e+07	1.70302e+07	1.93302e+07	1.89997e+07	1.60126e+07	1.93538e+07	2.20139e+07	1.99597e+07	2.03114e+07	2.01779e+07	2.20264e+07	2.23278e+07	2.31866e+07
Q9D1H6	NADH dehydrogenase [ubiquinone] 1 alpha subcomplex assembly factor 4 OS=Mus musculus OX=10090 GN=Ndufaf4 PE=1 SV=1	Ndufaf4	8	1	8	1	20.1	1.31869e+06	736140	781931	1.21675e+06	1.8785e+06	580530	704831	440124	984074	690807	356422	1.0197e+06	564572	428202	670691	839688	692702	619432
Q9CWZ7	Gamma-soluble NSF attachment protein OS=Mus musculus OX=10090 GN=Napg PE=1 SV=1	Napg	14	4	24	4	34.7	2.31937e+06	2.52636e+06	1.96403e+06	2.05465e+06	2.06746e+06	1.67204e+06	989549	1.30919e+06	4.03508e+06	1.62587e+06	1.50003e+06	2.21221e+06	1.46412e+06	1.59153e+06	1.96536e+06	681698	1.29107e+06	1.51365e+06
P62315	Small nuclear ribonucleoprotein Sm D1 OS=Mus musculus OX=10090 GN=Snrpd1 PE=1 SV=1	Snrpd1	11	2	22	2	13.3	1.39555e+06	949344	1.11548e+06	1.08392e+06	1.18589e+06	910737	970803	973854	1.40232e+06	956502	953795	687240	964155	837925	1.72853e+06	139361	804614	1.04096e+06
Q921N7	Transmembrane protein 70, mitochondrial OS=Mus musculus OX=10090 GN=Tmem70 PE=2 SV=2	Tmem70	4	1	4	1	28.3	744771	727458	244896	794841	1.12247e+06	329469	1.27694e+06	262998	563816	597938		838531		624296			397616	731480
P03921	NADH-ubiquinone oxidoreductase chain 5 OS=Mus musculus OX=10090 GN=Mtnd5 PE=1 SV=3	Mtnd5	19	8	147	8	68.4	3.28698e+07	1.31557e+07	1.53191e+07	2.33049e+07	4.12937e+07	1.73216e+07	1.84298e+07	1.16868e+07	3.90777e+07	2.76214e+07	2.02569e+07	2.59306e+07	1.77024e+07	1.60592e+07	2.14632e+07	1.64909e+07	1.85869e+07	1.3843e+07
O35685	Nuclear migration protein nudC OS=Mus musculus OX=10090 GN=Nudc PE=1 SV=1	Nudc	14	4	30	4	38.3	6.11357e+07	5.45301e+07	5.35652e+07	5.49782e+07	2.1251e+07	4.29251e+07	5.71197e+07	4.96107e+07	3.51503e+07	4.76468e+07	6.49294e+07	1.19592e+08	5.72553e+07	1.04267e+08	5.32355e+07	8.83913e+07	6.91668e+07	5.44513e+07
P99028	Cytochrome b-c1 complex subunit 6, mitochondrial OS=Mus musculus OX=10090 GN=Uqcrh PE=1 SV=2	Uqcrh	66	6	155	6	10.4	1.10459e+08	9.50961e+07	7.29554e+07	1.02518e+08	1.7692e+08	7.88484e+07	8.30259e+07	7.86725e+07	1.48464e+08	9.70829e+07	6.84594e+07	1.30425e+08	9.44132e+07	6.65224e+07	7.19349e+07	7.71025e+07	8.63883e+07	5.80565e+07
P62305	Small nuclear ribonucleoprotein E OS=Mus musculus OX=10090 GN=Snrpe PE=1 SV=1	Snrpe	12	1	18	1	10.8	2.49033e+06	2.42077e+06	1.97038e+06	2.65504e+06	3.78519e+06	1.56202e+06	1.92986e+06	1.7197e+06	1.80178e+06	2.43763e+06	2.20304e+06	1.79509e+06	1.8333e+06	2.01864e+06	2.33884e+06	2.01326e+06	2.17115e+06	2.8644e+06
P70452	Syntaxin-4 OS=Mus musculus OX=10090 GN=Stx4 PE=1 SV=1	Stx4	6	2	6	2	34.1	308676	750026	285318	183494	413140	592364	754936	438591	328896	1.00154e+06	456298	198885	1.05961e+06	977217	256732		1.52125e+06	1.17921e+06
Q148W8	Serine/threonine/tyrosine-interacting-like protein 2 OS=Mus musculus OX=10090 GN=Styxl2 PE=1 SV=1	Styxl2	3	2	10	2	128.5	80715.2	99654.3	119788	118042	156737	50239.3	76020.6	54875.5	53548.6	70382.2	77858		46107.9	50384.1	49684.7	69156.1	80446	93287.2
Q8BYL4	Tyrosine--tRNA ligase, mitochondrial OS=Mus musculus OX=10090 GN=Yars2 PE=1 SV=2	Yars2	4	1	4	1	52.6								457586	457257	666813	312791	618687	480064				1.17693e+06
Q9WVA4	Transgelin-2 OS=Mus musculus OX=10090 GN=Tagln2 PE=1 SV=4	Tagln2	48	9	107	9	22.4	1.49322e+07	1.00698e+07	1.25693e+07	1.49328e+07	2.81506e+07	7.73072e+06	12211636	1.31871e+07	2.15038e+07	1.52786e+07	1.04733e+07	1.51874e+07	1.09002e+07	1.49878e+07	2.65123e+07	1.20856e+07	1.37547e+07	1.43617e+07
Q3UBX0	Transmembrane protein 109 OS=Mus musculus OX=10090 GN=Tmem109 PE=1 SV=2	Tmem109	21	4	57	4	26.3	2.78326e+07	2.89001e+07	2.68788e+07	2.90408e+07	2.69249e+07	3.09504e+07	2.72758e+07	3.54988e+07	3.80949e+07	3.22942e+07	3.57785e+07	2.90823e+07	2.97233e+07	2.65698e+07	3.30191e+07	2.16747e+07	2.83774e+07	3.16945e+07
P58749	Transmembrane 6 superfamily member 1 OS=Mus musculus OX=10090 GN=Tm6sf1 PE=2 SV=2	Tm6sf1	2	1	6	1	41.6									361643
Q8JZL3	Thiamine-triphosphatase OS=Mus musculus OX=10090 GN=Thtpa PE=1 SV=3	Thtpa	4	1	17	1	24.2	352971	274492	216422	318075	251197		321787	484884	799930	396257	385764	875327	458470	748787	615896	627542	346258
Q6P2B1	Transportin-3 OS=Mus musculus OX=10090 GN=Tnpo3 PE=1 SV=1	Tnpo3	3	1	7	1	104.1	246107	302415	350488	437316	387627	359612	232950	387027	588375	403559	437876	221605	372862	320999	465325		388163	406388
Q9Z1T2	Thrombospondin-4 OS=Mus musculus OX=10090 GN=Thbs4 PE=1 SV=1	Thbs4	25	16	150	15	106.3	3.48511e+07	3.88349e+07	1.16823e+07	2.15511e+07	3.49549e+07	1.67212e+07	2.53323e+07	9.38553e+06	6.54528e+06	2.25533e+07	6.20276e+06	1.99901e+07	1.55867e+07	1.44047e+07	7.04323e+06	1.8619e+07	1.50217e+07	1.54161e+07
Q9CQK7	RWD domain-containing protein 1 OS=Mus musculus OX=10090 GN=Rwdd1 PE=1 SV=1	Rwdd1	14	3	29	3	27.8	1.60732e+06	1.24943e+06	1.14494e+06	1.46524e+06	1.20157e+06	1.10477e+06	1.15784e+06	1.46793e+06	1.68589e+06	758658	978328	989005	1.6175e+06	1.53154e+06	1.84083e+06	1.39268e+06	1.51564e+06	1.73234e+06
Q9DCT5	Stromal cell-derived factor 2 OS=Mus musculus OX=10090 GN=Sdf2 PE=1 SV=1	Sdf2	10	2	23	2	23.1	771355	553982	953885	245584	1.44363e+06	1.12129e+06	880298	1.40138e+06	886280	559296	845617	799837	595820	946466	945530	227835	296514	1.92414e+06
Q3TUA9	Protein O-mannose kinase OS=Mus musculus OX=10090 GN=Pomk PE=1 SV=2	Pomk	5	1	17	1	39.9	1.46241e+06	1.7852e+06	1.69738e+06	1.65897e+06	1.55169e+06	1.23904e+06	916292	1.20772e+06	947432	1.02273e+06	1.17913e+06	1.15572e+06	916847	719109	975857	948567	1.33227e+06	1.35399e+06
Q3UPR9	Somatomedin-B and thrombospondin type-1 domain-containing protein OS=Mus musculus OX=10090 GN=Sbspon PE=2 SV=1	Sbspon	15	4	4	4	29.4	139065				558975		179806	309082	147113	208550	84238.4	215989	87527.4	316648	166257		871591
P97364	Selenide, water dikinase 2 OS=Mus musculus OX=10090 GN=Sephs2 PE=1 SV=3	Sephs2	17	4	34	4	47.8	838759	1.35521e+06	1.54903e+06	1.04947e+06	1.3431e+06	1.16265e+06	1.40008e+06	975112	781950	925073	940602	1.04248e+06	843804	846900	882905	1.11691e+06	943464	1.31468e+06
Q922B2	Aspartate--tRNA ligase, cytoplasmic OS=Mus musculus OX=10090 GN=Dars1 PE=1 SV=2	Dars1	46	21	258	21	57.1	3.30927e+07	3.8311e+07	3.82728e+07	3.93727e+07	5.97375e+07	3.27838e+07	4.02522e+07	4.02765e+07	4.36677e+07	3.62223e+07	3.26238e+07	3.8579e+07	3.1778e+07	3.55556e+07	3.67437e+07	3.97227e+07	3.72603e+07	3.95965e+07
Q60864	Stress-induced-phosphoprotein 1 OS=Mus musculus OX=10090 GN=Stip1 PE=1 SV=1	Stip1	48	27	459	27	62.5	5.49615e+07	5.21672e+07	6.29239e+07	5.75855e+07	7.49358e+07	5.9115e+07	6.76513e+07	5.43387e+07	7.53534e+07	5.24834e+07	4.84274e+07	4.4963e+07	4.97665e+07	5.40629e+07	6.75036e+07	5.11925e+07	5.93928e+07	5.28897e+07
Q8CFI7	DNA-directed RNA polymerase II subunit RPB2 OS=Mus musculus OX=10090 GN=Polr2b PE=1 SV=2	Polr2b	2	2	4	2	133.8	247216	102468	270070			99829.1	278797	101354	124577	371686	251260	161705	74906.8	228139	349569	40959.8	375139	396988
B2RS91	RNA polymerase I-specific transcription initiation factor RRN3 OS=Mus musculus OX=10090 GN=Rrn3 PE=1 SV=1	Rrn3	3	2	55	2	74.5	1.61532e+09	1.40386e+09	1.43867e+09	1.54066e+09	1.22359e+09	1.6406e+09	1.4351e+09	1.91615e+09	2.03011e+09	1.84228e+09	2.16496e+09	2.72584e+09	2.69518e+09	3.35026e+09	2.18581e+09	2.43221e+09	1.96169e+09	2.00093e+09
Q9CZX8	40S ribosomal protein S19 OS=Mus musculus OX=10090 GN=Rps19 PE=1 SV=3	Rps19	39	7	98	7	16.1	9.40977e+06	1.53603e+07	1.66623e+07	2.36462e+07	2.16903e+07	2.09781e+07	2.30169e+07	1.3238e+07	1.76022e+07	3.04023e+07	1.57163e+07	1.02004e+07	2.02906e+07	2.07605e+07	2.5346e+07	1.4421e+07	1.72947e+07	1.91043e+07
P62245	40S ribosomal protein S15a OS=Mus musculus OX=10090 GN=Rps15a PE=1 SV=2	Rps15a	32	5	100	5	14.8	1.7986e+07	2.2406e+07	1.17917e+07	1.32806e+07	1.33046e+07	2.8488e+07	1.99455e+07	2.14409e+07	2.77445e+07	2.79061e+07	2.64806e+07	2.69599e+07	2.21655e+07	2.76469e+07	3.35055e+07	2.60261e+07	2.72179e+07	3.18689e+07
Q80SW1	S-adenosylhomocysteine hydrolase-like protein 1 OS=Mus musculus OX=10090 GN=Ahcyl1 PE=1 SV=1	Ahcyl1	5	3	18	2	58.9	742460	249236	627693	264476	116977	310064	203897	380134	510416	476233	177785	528186	377418	549307	1.34084e+06	501507	718910	452923
Q9R0P6	Signal peptidase complex catalytic subunit SEC11A OS=Mus musculus OX=10090 GN=Sec11a PE=1 SV=1	Sec11a	5	1	1	1	20.6								87775.9	103144				127663	125157	173883	117165
Q9CQS4	Solute carrier family 25 member 46 OS=Mus musculus OX=10090 GN=Slc25a46 PE=1 SV=1	Slc25a46	5	1	12	1	46.2	413397	208970	273711	285125	403750	209722	157256	179069	153723	270115	175930	160678		137200	113520	95215.5	142572	134501
Q03734	Serine protease inhibitor A3M OS=Mus musculus OX=10090 GN=Serpina3m PE=1 SV=2	Serpina3m	17	6	61	1	47	75614.7	47249.6	56106.5		92325.3		143213	140625		144861		264716	74844	91969.9	248177	147588	78535.6	134880
Q8BZ71	SH3 and cysteine-rich domain-containing protein 3 OS=Mus musculus OX=10090 GN=Stac3 PE=1 SV=1	Stac3	48	15	278	15	41	4.49726e+07	3.77692e+07	3.47368e+07	3.57203e+07	3.77622e+07	3.73584e+07	2.98515e+07	4.28163e+07	3.7496e+07	3.83913e+07	4.11509e+07	4.13215e+07	4.26644e+07	3.95501e+07	4.53362e+07	4.15942e+07	4.12854e+07	3.91082e+07
Q8CC35	Synaptopodin OS=Mus musculus OX=10090 GN=Synpo PE=1 SV=2	Synpo	19	11	156	11	99.5	3.39877e+07	3.93819e+07	3.54718e+07	4.18949e+07	3.56235e+07	3.67213e+07	3.46332e+07	3.76186e+07	3.67003e+07	3.63023e+07	2.93825e+07	3.61264e+07	2.90698e+07	2.87759e+07	2.84847e+07	3.40793e+07	3.84068e+07	3.26114e+07
Q9JJG0	Transforming acidic coiled-coil-containing protein 2 OS=Mus musculus OX=10090 GN=Tacc2 PE=1 SV=2	Tacc2	6	5	32	5	124.1	2.40845e+06	1.58033e+06	1.85306e+06	2.16638e+06	2.35373e+06	1.61386e+06	1.15403e+06	1.11724e+06	1.63753e+06	2.03844e+06	1.2672e+06	1.34884e+06	566527	1.70512e+06	1.55397e+06	1.29495e+06	883285	1.55192e+06
Q99KF1	Transmembrane emp24 domain-containing protein 9 OS=Mus musculus OX=10090 GN=Tmed9 PE=1 SV=2	Tmed9	7	2	31	2	27.1	3.16654e+06	1.85592e+06	1.75708e+06	907659	3.24967e+06	1.39195e+06	2.49518e+06	3.11682e+06	3.32165e+06	2.84835e+06	2.22615e+06	2.91689e+06	2.2209e+06	3.66704e+06	4.95979e+06	3.33184e+06	3.14783e+06	2.84887e+06
Q99PP9	Tripartite motif-containing protein 16 OS=Mus musculus OX=10090 GN=Trim16 PE=1 SV=2	Trim16	6	3	14	3	62.9	717651	733246	345349	545828	1.91168e+06	162704	1.33726e+06	574188	1.52663e+06	622892	686059	1.0615e+06	1.18312e+06	1.15496e+06	531598	778397	672077	666345
O55013	Trafficking protein particle complex subunit 3 OS=Mus musculus OX=10090 GN=Trappc3 PE=1 SV=1	Trappc3	24	4	21	4	20.3	1.3847e+06	2.09346e+06	1.35882e+06	1.0764e+06	1.13791e+06	1.21451e+06	1.24389e+06	1.49922e+06	1.72778e+06	1.22719e+06	909919	1.11826e+06	1.12448e+06	620926	1.07826e+06	755273	1.69599e+06	988533
Q9CQ69	Cytochrome b-c1 complex subunit 8 OS=Mus musculus OX=10090 GN=Uqcrq PE=1 SV=3	Uqcrq	46	5	89	5	9.8	8.43877e+07	7.01232e+07	6.54266e+07	8.55436e+07	1.29152e+08	8.28917e+07	7.74229e+07	5.8635e+07	1.06048e+08	8.15659e+07	5.45098e+07	9.29959e+07	7.85822e+07	6.28828e+07	6.67566e+07	7.10367e+07	7.66033e+07	6.98743e+07
P42925	Peroxisomal membrane protein 2 OS=Mus musculus OX=10090 GN=Pxmp2 PE=1 SV=2	Pxmp2	9	2	15	2	22.3	1.15881e+06	570793	456347	1.31233e+06	1.90548e+06	521151	697613	951856	1.01489e+06	1.26582e+06	488229	1.17705e+06	1.09635e+06	348179	1.11039e+06	1.28337e+06	1.28351e+06	1.09998e+06
P46638	Ras-related protein Rab-11B OS=Mus musculus OX=10090 GN=Rab11b PE=1 SV=3	Rab11b	42	10	149	10	24.5	1.85085e+07	1.57682e+07	1.59334e+07	1.43105e+07	1.43839e+07	1.64853e+07	1.85064e+07	1.94381e+07	2.2762e+07	1.83172e+07	1.68869e+07	1.68886e+07	1.90736e+07	1.78887e+07	2.37214e+07	1.96064e+07	2.02983e+07	1.77683e+07
P62242	40S ribosomal protein S8 OS=Mus musculus OX=10090 GN=Rps8 PE=1 SV=2	Rps8	21	4	24	4	24.2	3.18107e+06	1.56099e+06	1.48451e+06	1.95612e+06	1.12446e+06	1.45332e+06	2.87242e+06	1.60401e+06	6.02716e+06	4.36594e+06	4.24765e+06	4.62237e+06	4.16781e+06	5.21401e+06	7.41817e+06	5.92461e+06	1.85383e+06	4.36256e+06
Q6P8X1	Sorting nexin-6 OS=Mus musculus OX=10090 GN=Snx6 PE=1 SV=2	Snx6	7	3	5	3	46.6	630186	560042	722144	475791	385220	318526	419867	792362	797750	339643	474640	1.35275e+06	740292	680166	2.13536e+06	708243	434886	553145
O89104	Synaptophysin-like protein 2 OS=Mus musculus OX=10090 GN=Sypl2 PE=1 SV=1	Sypl2	32	6	161	6	29.2	8.50513e+07	8.73622e+07	7.58399e+07	1.13885e+08	7.8733e+07	1.08862e+08	9.48065e+07	9.30493e+07	1.61419e+08	1.09653e+08	1.19172e+08	1.17276e+08	1.0342e+08	7.96867e+07	1.00088e+08	8.09564e+07	9.28066e+07	1.12653e+08
Q8QZT1	Acetyl-CoA acetyltransferase, mitochondrial OS=Mus musculus OX=10090 GN=Acat1 PE=1 SV=1	Acat1	48	17	357	17	44.8	1.24494e+08	8.02622e+07	6.44719e+07	9.8158e+07	1.42413e+08	7.56365e+07	7.83009e+07	6.11019e+07	1.25047e+08	9.89528e+07	5.60579e+07	1.00746e+08	9.45619e+07	7.84046e+07	8.19706e+07	8.49171e+07	1.02641e+08	7.09735e+07
Q5SSZ5	Tensin-3 OS=Mus musculus OX=10090 GN=Tns3 PE=1 SV=1	Tns3	1	2	13	2	155.5	264011	230424		486368	555755	84394.2		207935	622059	289798	449970	955400		292929	1.21738e+06	193087	566254	510244
Q9WVA2	Mitochondrial import inner membrane translocase subunit Tim8 A OS=Mus musculus OX=10090 GN=Timm8a1 PE=1 SV=1	Timm8a1	11	1	15	1	11	1.41663e+06	546211		370560	1.13037e+06	376204	851993	984595	1.53766e+06	1.5557e+06	477635	1.19733e+06	1.16317e+06	1.34605e+06	1.03642e+06	1.25007e+06	1.08333e+06	690353
Q78IS1	Transmembrane emp24 domain-containing protein 3 OS=Mus musculus OX=10090 GN=Tmed3 PE=1 SV=1	Tmed3	5	1	10	1	25.4	846126	742871	644729	211396	1.18314e+06	199851	180744	548616	440885	513707	613080	733392	597703	930332	373178	671068	591832	262787
Q8BYU6	Torsin-1A-interacting protein 2 OS=Mus musculus OX=10090 GN=Tor1aip2 PE=1 SV=1	Tor1aip2	7	3	8	2	54.5	298947	278593	237258	277143	465136	220509	406905	108942	196050	266247		407355	184081	224895	178661		103126	250854
Q9DBS1	Transmembrane protein 43 OS=Mus musculus OX=10090 GN=Tmem43 PE=1 SV=1	Tmem43	33	7	56	7	44.8	4.98044e+06	3.14502e+06	4.5093e+06	5.19561e+06	6.84083e+06	3.1665e+06	3.99458e+06	4.92363e+06	6.40974e+06	3.5463e+06	4.98835e+06	4.8021e+06	4.51988e+06	4.52943e+06	8.06992e+06	4.80997e+06	2.61443e+06	3.13775e+06
Q8CGN5	Perilipin-1 OS=Mus musculus OX=10090 GN=Plin1 PE=1 SV=2	Plin1	47	18	48	18	55.6	1.77507e+06	2.38641e+06	3.54779e+06	3.34253e+06	2.6192e+06	1.7304e+06	1.91567e+06	2.58668e+06	1.70434e+07	4.34361e+06	1.58148e+06	839338	1.97164e+06	2.24852e+06	5.7885e+07	2.01928e+06	3.32279e+06	5.31262e+06
Q9WUM5	Succinate--CoA ligase [ADP/GDP-forming] subunit alpha, mitochondrial OS=Mus musculus OX=10090 GN=Suclg1 PE=1 SV=4	Suclg1	32	9	184	9	36.1	1.2959e+08	9.82497e+07	7.4114e+07	1.08752e+08	1.59136e+08	8.53833e+07	8.88391e+07	7.5962e+07	1.37027e+08	9.70762e+07	7.22185e+07	1.21151e+08	9.81938e+07	8.0769e+07	6.61848e+07	5.78293e+07	9.6263e+07	7.55038e+07
Q9CXF4	TBC1 domain family member 15 OS=Mus musculus OX=10090 GN=Tbc1d15 PE=1 SV=1	Tbc1d15	1	1	1	1	76.5		90293.6			180317	137216	131456	137693	131052	190869	171876	118901	168187	138923	174656	172977	127568	125442
Q9WV98	Mitochondrial import inner membrane translocase subunit Tim9 OS=Mus musculus OX=10090 GN=Timm9 PE=1 SV=1	Timm9	53	4	31	4	10.3	2.24809e+06	1.34587e+06	1.91675e+06	1.03813e+06	3.32144e+06	1.77346e+06	1.57307e+06	2.68335e+06	2.63689e+06	2.09338e+06	1.81367e+06	2.84286e+06	4.42179e+06	1.95982e+06	2.06018e+06	1.76374e+06	1.7028e+06	1.6525e+06
Q9R0Q3	Transmembrane emp24 domain-containing protein 2 OS=Mus musculus OX=10090 GN=Tmed2 PE=1 SV=1	Tmed2	21	5	58	5	22.7	7.5874e+06	5.39985e+06	5.58608e+06	6.73021e+06	7.84687e+06	5.99788e+06	6.43838e+06	5.97513e+06	6.82502e+06	6.70781e+06	5.71826e+06	8.18006e+06	6.79855e+06	6.56994e+06	7.71459e+06	5.76085e+06	6.16927e+06	6.15148e+06
Q9JME7	Trafficking protein particle complex subunit 2-like protein OS=Mus musculus OX=10090 GN=Trappc2l PE=1 SV=1	Trappc2l	14	1	4	1	16
P58774	Tropomyosin beta chain OS=Mus musculus OX=10090 GN=Tpm2 PE=1 SV=1	Tpm2	86	41	2580	6	32.8	4.73278e+09	3.17101e+09	3.24187e+09	2.88541e+09	4.37001e+09	3.09252e+09	3.17761e+09	3.14886e+09	5.09095e+09	3.35594e+09	3.04327e+09	4.34052e+09	3.31689e+09	2.57937e+09	3.43468e+09	2.62555e+09	3.43434e+09	2.66931e+09
Q8K1J6	CCA tRNA nucleotidyltransferase 1, mitochondrial OS=Mus musculus OX=10090 GN=Trnt1 PE=1 SV=1	Trnt1	6	2	20	2	49.9	988277	1.11041e+06	847673	1.28994e+06	1.37867e+06	499945	609426	1.11558e+06	1.52999e+06	1.45796e+06	1.0223e+06	763934	566262	781049	1.21124e+06	690145	696751	779749
Q9CQN1	Heat shock protein 75 kDa, mitochondrial OS=Mus musculus OX=10090 GN=Trap1 PE=1 SV=1	Trap1	33	19	201	18	80.2	2.15607e+07	1.86659e+07	1.40919e+07	2.21967e+07	2.76962e+07	1.57426e+07	1.65596e+07	1.33598e+07	1.90196e+07	1.83257e+07	1.57058e+07	1.3442e+07	1.44388e+07	1.85531e+07	1.59675e+07	1.92626e+07	1.95683e+07	1.79751e+07
Q9CRB6	Tubulin polymerization-promoting protein family member 3 OS=Mus musculus OX=10090 GN=Tppp3 PE=1 SV=1	Tppp3	35	6	108	6	19	1.2291e+07	1.73002e+07	2.00007e+07	2.71206e+07	2.69001e+07	1.6501e+07	1.66316e+07	2.14462e+07	3.17787e+07	2.49271e+07	1.86559e+07	1.69412e+07	2.04628e+07	2.305e+07	2.24791e+07	1.58935e+07	1.93618e+07	1.89046e+07
Q9D710	Thioredoxin-related transmembrane protein 2 OS=Mus musculus OX=10090 GN=Tmx2 PE=1 SV=1	Tmx2	19	5	65	5	33.9	3.84246e+06	3.1583e+06	2.83009e+06	2.29777e+06	5.93099e+06	5.24901e+06	2.95657e+06	4.35955e+06	1.30336e+07	7.14788e+06	3.61219e+06	5.47673e+06	4.28774e+06	3.26192e+06	9.33785e+06	5.283e+06	3.73786e+06	4.5948e+06
Q62009	Periostin OS=Mus musculus OX=10090 GN=Postn PE=1 SV=2	Postn	28	17	138	17	93.1	5.70977e+07	3.87243e+07	3.12039e+07	2.63136e+07	3.60956e+07	3.19629e+07	6.99911e+07	4.33851e+07	7.0593e+07	5.48692e+07	6.00838e+07	5.62917e+07	6.52096e+07	8.16709e+07	7.82273e+07	7.45029e+07	4.69304e+07	6.30577e+07
Q8BGH4	Receptor expression-enhancing protein 1 OS=Mus musculus OX=10090 GN=Reep1 PE=1 SV=1	Reep1	5	1	3	1	22.3	1.24308e+06	609243	615247	792174	1.45522e+06	783766	659090	822996	866755	624251		576241		294242	447985	341241	553212	585510
P62911	60S ribosomal protein L32 OS=Mus musculus OX=10090 GN=Rpl32 PE=1 SV=2	Rpl32	10	1	4	1	15.9	248739	398616	249700	351651	374567				1.03425e+06	275380					1.26567e+06	384200	265243
Q91VI7	Ribonuclease inhibitor OS=Mus musculus OX=10090 GN=Rnh1 PE=1 SV=1	Rnh1	64	21	290	21	49.8	4.02605e+07	5.19748e+07	3.5831e+07	4.21893e+07	4.36402e+07	3.63407e+07	4.03037e+07	4.48703e+07	4.77711e+07	4.28206e+07	4.01688e+07	3.63104e+07	3.88943e+07	4.33099e+07	4.80656e+07	4.68683e+07	4.02796e+07	4.11322e+07
P83882	60S ribosomal protein L36a OS=Mus musculus OX=10090 GN=Rpl36a PE=3 SV=2	Rpl36a	24	3	22	3	12.4	1.50405e+06	1.43996e+06	1.1549e+06	1.58228e+06	3.31805e+06	2.14348e+06	3.20962e+06	2.90245e+06	4.07323e+06	2.56329e+06	3.55784e+06	2.00288e+06	3.95919e+06	3.40234e+06	5.65166e+06	5.12113e+06	2.80081e+06	4.72189e+06
Q9D338	39S ribosomal protein L19, mitochondrial OS=Mus musculus OX=10090 GN=Mrpl19 PE=1 SV=1	Mrpl19	7	2	15	2	33.6	5.38764e+06	3.54296e+06	4.25194e+06	4.30878e+06	6.49409e+06	7.00655e+06	6.71953e+06	5.65382e+06	1.23652e+07	4.15898e+06	3.71964e+06	2.44319e+06	5.78483e+06	3.42248e+06	2.97252e+06	2.30435e+06	3.43891e+06	4.76549e+06
P68372	Tubulin beta-4B chain OS=Mus musculus OX=10090 GN=Tubb4b PE=1 SV=1	Tubb4b	69	22	710	3	49.8	3.22969e+08	3.72166e+08	3.03676e+08	4.14266e+08	5.10646e+08	2.49661e+08	2.76162e+08	3.08914e+08	3.64883e+08	3.0158e+08	2.77352e+08	3.01069e+08	2.84654e+08	3.3274e+08	3.25142e+08	3.17292e+08	3.27463e+08	3.69748e+08
O35857	Mitochondrial import inner membrane translocase subunit TIM44 OS=Mus musculus OX=10090 GN=Timm44 PE=1 SV=2	Timm44	28	12	133	12	51.1	1.22389e+08	1.90744e+08	1.1518e+08	1.5444e+08	8.07354e+07	1.77002e+08	1.47424e+08	1.92578e+08	1.30638e+08	1.561e+08	1.53725e+08	1.59493e+08	1.36495e+08	1.25454e+08	8.36235e+07	1.05292e+08	1.54385e+08	1.51049e+08
B1AXP6	Mitochondrial import receptor subunit TOM5 homolog OS=Mus musculus OX=10090 GN=Tomm5 PE=3 SV=1	Tomm5	29	2	8	2	6	4.15925e+06	3.1e+06	2.89769e+06	3.30167e+06	3.16616e+06	3.08308e+06	6520324	3.95004e+06	3.63831e+06	4.38501e+06	4.43569e+06	7.93946e+06	3.81418e+06	5.40749e+06	5.59031e+06	4.7481e+06	4.40294e+06	4.16825e+06
Q9WUZ5	Troponin I, slow skeletal muscle OS=Mus musculus OX=10090 GN=Tnni1 PE=1 SV=3	Tnni1	42	11	160	11	21.7	7.93358e+06	4.25358e+06	1.49253e+06	1.14654e+08	6.24517e+07	1.43384e+07	5.19311e+07	5.38223e+07	1.74458e+08	1.5192e+08	3.70059e+06	1.22073e+07	2.80107e+07	1.78286e+07	1.05679e+06	1.11959e+08	3.91172e+07	1.89536e+07
Q61469	Phospholipid phosphatase 1 OS=Mus musculus OX=10090 GN=Plpp1 PE=1 SV=1	Plpp1	6	1	8	1	31.9			65253.9						191433									43800.4
Q8BJY1	26S proteasome non-ATPase regulatory subunit 5 OS=Mus musculus OX=10090 GN=Psmd5 PE=1 SV=4	Psmd5	17	8	78	8	55.9	9.27477e+06	8.0568e+06	5.42264e+06	9.24772e+06	1.0726e+07	6.14948e+06	7.90249e+06	6.2347e+06	5.48202e+06	8.93194e+06	5.00344e+06	9.2662e+06	4.76996e+06	5.12631e+06	5.16882e+06	6.09098e+06	6.18312e+06	7.66742e+06
Q8VE91	Reticulophagy regulator 1 OS=Mus musculus OX=10090 GN=Retreg1 PE=1 SV=2	Retreg1	4	2	19	2	52.9	2.31011e+06	2.19922e+06	1.7149e+06	1.4233e+06	598199	1.91537e+06	1.12335e+06	2.11176e+06	2.57129e+06	1.10198e+06	1.88246e+06	1.70777e+06	2.49709e+06	2.56397e+06	1.95553e+06	2.57006e+06	1.92195e+06	1.5395e+06
Q9D8E6	60S ribosomal protein L4 OS=Mus musculus OX=10090 GN=Rpl4 PE=1 SV=3	Rpl4	28	11	74	11	47.1	6.96028e+06	8.02578e+06	7.70905e+06	5.32386e+06	3.17773e+06	8.84404e+06	6.72207e+06	7.7638e+06	1.75058e+07	6.0776e+06	6.16365e+06	5.33667e+06	7.62011e+06	6.08105e+06	1.80008e+07	1.32462e+07	6.98495e+06	1.20056e+07
Q91VW3	SH3 domain-binding glutamic acid-rich-like protein 3 OS=Mus musculus OX=10090 GN=Sh3bgrl3 PE=1 SV=1	Sh3bgrl3	40	4	15	4	10.5	3.84888e+06	3.06044e+06	2.44644e+06	3.51733e+06	3.49178e+06	1.56607e+06	1.59762e+06	3.47229e+06	3.79242e+06	2.41445e+06	2.10336e+06	3.34244e+06	2.8928e+06	3.07153e+06	1.34509e+07	2.4267e+06	2.55681e+06	3.28048e+06
P70663	SPARC-like protein 1 OS=Mus musculus OX=10090 GN=Sparcl1 PE=1 SV=3	Sparcl1	12	5	16	5	72.2	1.23958e+06	981650	1.88785e+06	1.34524e+06	1.48973e+06	1.53959e+06	973473	1.68357e+06	939927	1.1477e+06	1.88556e+06	893514	748269	1.11376e+06	597862	721765	1.1803e+06	1.88658e+06
P16546	Spectrin alpha chain, non-erythrocytic 1 OS=Mus musculus OX=10090 GN=Sptan1 PE=1 SV=4	Sptan1	38	74	686	73	284.4	2.21984e+09	2.79188e+09	2.64332e+09	2.54368e+09	2.50638e+09	2.16191e+09	1.99965e+09	2.32051e+09	2.14247e+09	2.29144e+09	2.91162e+09	2.45795e+09	2.74469e+09	3.10839e+09	2.04669e+09	2.30234e+09	2.24652e+09	2.18109e+09
P14576	Signal recognition particle 54 kDa protein OS=Mus musculus OX=10090 GN=Srp54 PE=1 SV=2	Srp54	4	1	11	1	55.7	509015	510629	331193	629323	638714	299065	298548	343688	682572	260090	428482	304593	357292	468786	342795	512808	524651	548785
P70318	Nucleolysin TIAR OS=Mus musculus OX=10090 GN=Tial1 PE=1 SV=1	Tial1	5	1	17	1	43.4	401825	387394	516175	607660	599879	349880	369632	322978	312220	295217	277931	279125	311733	280843	307875	359527	330933	390529
P54797	Transport and Golgi organization 2 homolog OS=Mus musculus OX=10090 GN=Tango2 PE=1 SV=1	Tango2	9	1	14	1	30.9		227144			694123	193484			366885	255577	174758	241974	171616
Q99LG2	Transportin-2 OS=Mus musculus OX=10090 GN=Tnpo2 PE=1 SV=1	Tnpo2	5	3	33	1	100.4	207282	269303	248771			111575	244653		303341		279244	246395	356741	247894	235724		244487
P50752	Troponin T, cardiac muscle OS=Mus musculus OX=10090 GN=Tnnt2 PE=1 SV=2	Tnnt2	6	2	15	1	35.8	4.53718e+06	2.51635e+06	2.9693e+06	2.35101e+06	2.07794e+06	2.20914e+06	3.32999e+06	2.61529e+06	3.78873e+06	2.14606e+06			286144	201598			1.46659e+06	1.89603e+06
Q7TQD2	Tubulin polymerization-promoting protein OS=Mus musculus OX=10090 GN=Tppp PE=1 SV=1	Tppp	4	1	17	1	23.6	491182	462858	542108	760221	663252	771804	631406	487419	833377	778916	606540	1.0258e+06	766751	888232	1.07604e+06	887452	586532	595797
Q8R3G9	Tetraspanin-8 OS=Mus musculus OX=10090 GN=Tspan8 PE=1 SV=1	Tspan8	13	2	8	2	25.6	6.90824e+06	3.58302e+06	2.64297e+06	6.30288e+06	1.06872e+07	2.25657e+06	3.8572e+06	3.22108e+06	9.29825e+06	5.55115e+06	2.70502e+06	6.48215e+06	3.7308e+06	2.04558e+06	2.53573e+06	2.94661e+06	4.76309e+06	3.31034e+06
P67984	60S ribosomal protein L22 OS=Mus musculus OX=10090 GN=Rpl22 PE=1 SV=2	Rpl22	19	2	28	2	14.8	4.32125e+06	3.06935e+06	3.81757e+06	4.83677e+06	7.1526e+06	3.27648e+06	4.87455e+06	4.46515e+06	3.40378e+06	3.12131e+06	4.57452e+06	2.74398e+06	2.89991e+06	3.41638e+06	5.9343e+06	5.70446e+06	5.61479e+06	6.05196e+06
O55131	Septin-7 OS=Mus musculus OX=10090 GN=Septin7 PE=1 SV=1	Septin7	23	7	86	7	50.5	1.1149e+07	1.03572e+07	8.45903e+06	1.09237e+07	1.56924e+07	8.18572e+06	7.77753e+06	9.42866e+06	1.22709e+07	1.00454e+07	7.44703e+06	1.22604e+07	8.17447e+06	9.9452e+06	1.05773e+07	9.87918e+06	1.0794e+07	1.04583e+07
Q8VIJ6	Splicing factor, proline- and glutamine-rich OS=Mus musculus OX=10090 GN=Sfpq PE=1 SV=1	Sfpq	13	8	43	7	75.4	7.62835e+06	5.27123e+06	6.0145e+06	7.46869e+06	8.17491e+06	5.87464e+06	6.46409e+06	6.38221e+06	8.6717e+06	8.13622e+06	6.79987e+06	9.08083e+06	6.74185e+06	6.89809e+06	1.17329e+07	7.54281e+06	7.14086e+06	8.35884e+06
Q8R104	NAD-dependent protein deacetylase sirtuin-3 OS=Mus musculus OX=10090 GN=Sirt3 PE=1 SV=2	Sirt3	4	1	9	1	36.6		268916	190919	272339	522027	191388	266087	358626	548251	217769	198897	264217	270295	152105	218910	204016	406627	267700
Q3URD3	Sarcolemmal membrane-associated protein OS=Mus musculus OX=10090 GN=Slmap PE=1 SV=2	Slmap	11	9	59	9	96.9	4.58064e+06	2.80164e+06	908908	3.60333e+06	5.18461e+06	1.48082e+06	2.46671e+06	2.65832e+06	6.13507e+06	4.06204e+06	1.11845e+06	4.14133e+06	2.63582e+06	1.03183e+06	302761	3.86055e+06	3.91927e+06	1.16684e+06
Q99JB2	Stomatin-like protein 2, mitochondrial OS=Mus musculus OX=10090 GN=Stoml2 PE=1 SV=1	Stoml2	18	5	36	5	38.4	1.45921e+06	704719	479292	1.37591e+06	899794	330734	441745	1.43039e+06	964741	2.32695e+06	585255	1.71569e+06	1.45979e+06	830028	1.40532e+06	1.68193e+06	1.48054e+06	857767
Q93092	Transaldolase OS=Mus musculus OX=10090 GN=Taldo1 PE=1 SV=2	Taldo1	27	10	125	10	37.4	2.67074e+07	2.50585e+07	1.6505e+07	2.6087e+07	3.12492e+07	2.63918e+07	2.19547e+07	2.08137e+07	3.20152e+07	2.31349e+07	1.85444e+07	3.31735e+07	2.14381e+07	2.61584e+07	4.45447e+07	2.02574e+07	2.4504e+07	2.44886e+07
Q91XE8	Transmembrane protein 205 OS=Mus musculus OX=10090 GN=Tmem205 PE=1 SV=1	Tmem205	5	1	3	1	21.2										486986		464734	443843	269746	425176
Q99J99	3-mercaptopyruvate sulfurtransferase OS=Mus musculus OX=10090 GN=Mpst PE=1 SV=4	Mpst	39	9	102	8	33.1	2.52395e+07	1.62319e+07	1.26583e+07	1.9793e+07	2.49215e+07	2.00535e+07	2.1926e+07	1.87424e+07	1.88837e+07	1.7984e+07	1.7911e+07	2.17256e+07	1.87814e+07	2.4312e+07	2.04107e+07	2.36719e+07	1.23909e+07	1.88282e+07
Q8BUY5	Complex I assembly factor TIMMDC1, mitochondrial OS=Mus musculus OX=10090 GN=Timmdc1 PE=1 SV=1	Timmdc1	6	2	7	2	31.8		585542	497515	486997	697858		430275	366140	626272	630338	466646	573793	239549	334912	853711	374798	428300	510762
P62075	Mitochondrial import inner membrane translocase subunit Tim13 OS=Mus musculus OX=10090 GN=Timm13 PE=1 SV=1	Timm13	42	4	33	4	10.5	1.54901e+06	1.03932e+06	1.37685e+06	1.35517e+06	2.42366e+06	1.26195e+06	1.59462e+06	985548	1.81208e+06	1.90685e+06	1.53494e+06	2.28814e+06	1.53347e+06	1.54167e+06	2.13614e+06	2.23155e+06	2.07114e+06	1.28305e+06
Q62318	Transcription intermediary factor 1-beta OS=Mus musculus OX=10090 GN=Trim28 PE=1 SV=3	Trim28	11	7	22	7	88.8	1.67186e+06	1.40709e+06	1.4471e+06	2.05953e+06	2.15201e+06	988307	1.45912e+06	1.58132e+06	2.32848e+06	1.80758e+06	1.27241e+06	1.25427e+06	1.29345e+06	1.68211e+06	2.49734e+06	1.62686e+06	1.64219e+06	1.82812e+06
P17751	Triosephosphate isomerase OS=Mus musculus OX=10090 GN=Tpi1 PE=1 SV=5	Tpi1	91	19	921	19	26.7	3.04385e+09	3.18184e+09	3.15437e+09	2.63036e+09	2.85857e+09	2.72534e+09	2.4754e+09	2.78654e+09	2.67368e+09	2.57074e+09	2.68024e+09	2.62295e+09	2.52522e+09	2.86017e+09	2.405e+09	2.38401e+09	2.70389e+09	2.50618e+09
Q3UJ81	Nuclear envelope phosphatase-regulatory subunit 1 OS=Mus musculus OX=10090 GN=Cnep1r1 PE=1 SV=1	Cnep1r1	8	1	15	1	14.3	398743	251542	214008	415254	298560	391075	162017	231482	233958	303392	267127	267330	338142	310688	489256	464815	386530	402397
P62878	E3 ubiquitin-protein ligase RBX1 OS=Mus musculus OX=10090 GN=Rbx1 PE=1 SV=1	Rbx1	44	2	20	2	12.3	1.02497e+06	1.0163e+06	1.07815e+06	986532	2.18381e+06	1.62518e+06	1.38389e+06	1.53724e+06	1.52613e+06	1.68109e+06	1.37264e+06	1.48993e+06	1.66057e+06	1.01772e+06	1.54028e+06	604505	1.63092e+06	1.31619e+06
Q9WTZ1	RING-box protein 2 OS=Mus musculus OX=10090 GN=Rnf7 PE=1 SV=1	Rnf7	30	2	12	2	12.7	951318	1.82199e+06	1.10813e+06	1.25542e+06	1.55585e+06	1.26553e+06	556788	598521	957784	968754	515166	887043	430801	715502	1.29834e+06	1.24615e+06	737913	931126
P62830	60S ribosomal protein L23 OS=Mus musculus OX=10090 GN=Rpl23 PE=1 SV=1	Rpl23	32	3	60	3	14.9	5.79431e+07	5.43549e+07	7.07145e+07	6.53731e+07	1.17052e+08	1.08477e+08	1.02542e+08	7.88255e+07	8.2817e+07	1.04467e+08	7.71608e+07	1.05665e+08	8.33966e+07	8.49694e+07	7.85845e+07	7.21833e+07	8.62807e+07	8.30989e+07
Q9D2Z4	Sentrin-specific protease 8 OS=Mus musculus OX=10090 GN=Senp8 PE=1 SV=2	Senp8	11	2	20	2	25	1.46073e+06	1.37213e+06	1.58823e+06	1.28019e+06	1.24747e+06	1.28944e+06	892320	1.27851e+06	261889	956870	1.08338e+06	727324	840307	1.47255e+06	1.04912e+06	1.35236e+06	1.13656e+06	1.15362e+06
Q8C5W3	Tubulin-specific chaperone cofactor E-like protein OS=Mus musculus OX=10090 GN=Tbcel PE=1 SV=1	Tbcel	9	3	10	3	48	1.42885e+06	1.83909e+06	549005	1.57017e+06	275421	1.36189e+06	955994	945812	968528	401362	975052	1.32142e+06	686196	538705	870124	708518	1.2278e+06	590991
P68369	Tubulin alpha-1A chain OS=Mus musculus OX=10090 GN=Tuba1a PE=1 SV=1	Tuba1a	57	18	592	2	50.1	4.32975e+07	3.50541e+07	3.18136e+07	2.55114e+07	4.44653e+07	2.89649e+07	2.73353e+07	2.32699e+07	4.1735e+07	2.24475e+07	2.20008e+07	2.70768e+07	2.38514e+07	3.75729e+07	5.37037e+07	2.96729e+07	3.58457e+07	3.46884e+07
P19123	Troponin C, slow skeletal and cardiac muscles OS=Mus musculus OX=10090 GN=Tnnc1 PE=1 SV=1	Tnnc1	56	8	61	8	18.4		1.33953e+06	1.12767e+06	2.96567e+07	1.6978e+07	5.32891e+06	1.11606e+07	1.31352e+07	8.37746e+07	4.89563e+07	2.27573e+06	4.54891e+06	9.25523e+06	5.21997e+06	1.05841e+06	3.2194e+07	9.46024e+06	4.9264e+06
Q9CX86	Heterogeneous nuclear ribonucleoprotein A0 OS=Mus musculus OX=10090 GN=Hnrnpa0 PE=1 SV=1	Hnrnpa0	22	4	28	4	30.5	649884	754925	632741	1.843e+06	2.0585e+06	552463	727568	1.11649e+06	1.40552e+06	1.25478e+06	814707	1.39579e+06	666310	606736	1.14375e+06	897707	1.03186e+06	1.31712e+06
Q9CQI7	U2 small nuclear ribonucleoprotein B'' OS=Mus musculus OX=10090 GN=Snrpb2 PE=1 SV=1	Snrpb2	8	2	22	2	25.3	6.07033e+06	3.79527e+06	4.34116e+06	6.67235e+06	4.61338e+06	4.25583e+06	2.8028e+06	2.47453e+06	3.13332e+06	6.37822e+06	2.93747e+06	2.80626e+06	2.35064e+06	344491	4.73472e+06	7.24572e+06	2.11935e+06	3.62915e+06
Q9EQU5	Protein SET OS=Mus musculus OX=10090 GN=Set PE=1 SV=1	Set	11	2	20	2	33.4	1.29179e+06	1.62441e+06	902532	532283	1.13308e+06	1.18133e+06	832188	757729	1.96876e+06	1.01724e+06	350878	1.79407e+06	742769	888556	2.66633e+06	1.78007e+06	1.04558e+06	1.85687e+06
P63271	Transcription elongation factor SPT4-A OS=Mus musculus OX=10090 GN=Supt4h1a PE=2 SV=1	Supt4h1a	14	1	2	1	13.2	136968	87424.2	94698.3	7393.4	45652.5	88861.8	87432.2	77542.4	136789	87661.7	138262	62691.4	104672	135695	223686	135245	93953.9	175809
P15501	Prostatic spermine-binding protein OS=Mus musculus OX=10090 GN=Sbp PE=2 SV=1	Sbp	14	2	10	2	22	387983	1.05922e+06	414531		2.49359e+06	1.49936e+06	3.71884e+06	764985	2.31757e+06	1.26143e+06		1.28776e+06	613348	343694	602726	662788	421311	702442
Q8VDQ8	NAD-dependent protein deacetylase sirtuin-2 OS=Mus musculus OX=10090 GN=Sirt2 PE=1 SV=2	Sirt2	28	8	112	8	43.2	4.39401e+06	2.96747e+06	3.38077e+06	4.7995e+06	3.90347e+06	5.39041e+06	4.57745e+06	4.51165e+06	4.85181e+06	5.63868e+06	3.94975e+06	6.07935e+06	4.97697e+06	6.30051e+06	4.83497e+06	4.70979e+06	5.5094e+06	4.14228e+06
Q9D5V6	Synapse-associated protein 1 OS=Mus musculus OX=10090 GN=Syap1 PE=1 SV=1	Syap1	10	1	2	1	41.3							152978			362864			407308		673167	352181	717105	276884
Q9DCF9	Translocon-associated protein subunit gamma OS=Mus musculus OX=10090 GN=Ssr3 PE=1 SV=1	Ssr3	8	1	15	1	21.1	362579	406707	308177	313391	520665	240473	314579	265306	261902	232594	336288	248979	304987	347271	401151	383296	291104	291604
Q6PDM2	Serine/arginine-rich splicing factor 1 OS=Mus musculus OX=10090 GN=Srsf1 PE=1 SV=3	Srsf1	25	6	66	6	27.7	3.98771e+06	3.82345e+06	2.92925e+06	4.04544e+06	6.53262e+06	3.73207e+06	3.05574e+06	2.88171e+06	4.52458e+06	3.92924e+06	2.46732e+06	4.46536e+06	2.52481e+06	2.89644e+06	6.12583e+06	4.10107e+06	2.56084e+06	3.9964e+06
Q8C878	NEDD8-activating enzyme E1 catalytic subunit OS=Mus musculus OX=10090 GN=Uba3 PE=1 SV=2	Uba3	16	5	41	5	51.7	2.89482e+06	3.01657e+06	3.25117e+06	1.68645e+06	4.24724e+06	2.93866e+06	1.91805e+06	1.4934e+06	766883	2.4177e+06		716297	1.82359e+06	2.78209e+06	1.77085e+06	1.50852e+06	3.35018e+06	783264
O70492	Sorting nexin-3 OS=Mus musculus OX=10090 GN=Snx3 PE=1 SV=3	Snx3	32	6	50	5	18.7	5.3109e+06	3.45557e+06	5.27712e+06	2.2418e+06	6.9433e+06	3.4495e+06	2462642	3.84261e+06	4.94527e+06	4.66243e+06	4.06754e+06	4.00064e+06	2.37422e+06	5.77558e+06	4.81548e+06	5.47584e+06	4.36574e+06	5.91782e+06
Q9CXE7	Transmembrane emp24 domain-containing protein 5 OS=Mus musculus OX=10090 GN=Tmed5 PE=1 SV=1	Tmed5	7	2	12	2	26.2	7.84866e+07	2.99185e+07	2.21258e+07	1.5478e+07	6.84902e+07	4.55896e+07	4.15086e+07	6.66798e+07	9.31688e+07	4.21125e+07	4.96182e+07	7.86998e+07	6.88492e+07	6.88378e+07	7.52989e+07	5.41773e+07	7.26517e+07	3.70707e+07
Q9CYZ2	Tumor protein D54 OS=Mus musculus OX=10090 GN=Tpd52l2 PE=1 SV=1	Tpd52l2	26	4	35	4	24	5.00413e+06	3.34806e+06	4.41409e+06	3.76676e+06	5.49832e+06	2.51023e+06	4.78182e+06	4.40094e+06	6.45616e+06	4.57058e+06	3.89632e+06	3.4377e+06	4.32039e+06	4.8006e+06	5.5784e+06	3.12573e+06	3.07854e+06	5.11615e+06
Q9Z321	DNA topoisomerase 3-beta-1 OS=Mus musculus OX=10090 GN=Top3b PE=1 SV=1	Top3b	4	2	5	2	96.9	135033					113833			81729			76449.1		201817	107403	176465	244845	209956
P58771	Tropomyosin alpha-1 chain OS=Mus musculus OX=10090 GN=Tpm1 PE=1 SV=1	Tpm1	87	48	2804	22	32.7	1.28966e+10	1.34863e+10	1.41088e+10	1.20367e+10	9.65818e+09	1.35156e+10	1.29127e+10	1.38082e+10	1.21476e+10	1.32476e+10	1.4727e+10	1.27886e+10	1.3464e+10	1.42589e+10	1.45103e+10	1.3358e+10	1.35999e+10	1.27734e+10
Q9ES00	Ubiquitin conjugation factor E4 B OS=Mus musculus OX=10090 GN=Ube4b PE=1 SV=3	Ube4b	2	2	7	2	133.2	249746	304152	218859	245222	266942	658802	193441							206824
P62254	Ubiquitin-conjugating enzyme E2 G1 OS=Mus musculus OX=10090 GN=Ube2g1 PE=1 SV=3	Ube2g1	16	3	19	3	19.5	5.57612e+06	4.37416e+06	3.3512e+06	4.41146e+06	6.24291e+06	4.13795e+06	4.2803e+06	5.22862e+06	7.57166e+06	5.57008e+06	5.87434e+06	5.59931e+06	4.99647e+06	3.78904e+06	4.31777e+06	3.54796e+06	5.54188e+06	5.16507e+06
O55101	Synaptogyrin-2 OS=Mus musculus OX=10090 GN=Syngr2 PE=2 SV=1	Syngr2	4	1	14	1	24.8	669054	652754	471759	1.2945e+06	177549	1.08417e+06	1.39583e+06	2.02155e+06	1.75541e+06	2.64416e+06	1.40405e+06	1.11938e+06	894216	1.77188e+06	2.43291e+06	1.74019e+06	1.79845e+06	2.29355e+06
P26638	Serine--tRNA ligase, cytoplasmic OS=Mus musculus OX=10090 GN=Sars1 PE=1 SV=3	Sars1	28	12	162	12	58.4	1.54593e+07	1.24808e+07	8.68504e+06	1.07737e+07	1.31611e+07	8.46071e+06	1.10252e+07	1.47669e+07	1.67917e+07	1.61462e+07	1.04101e+07	1.60338e+07	1.41982e+07	1.39293e+07	1.43545e+07	1.53875e+07	1.51876e+07	1.17566e+07
Q921H8	3-ketoacyl-CoA thiolase A, peroxisomal OS=Mus musculus OX=10090 GN=Acaa1a PE=1 SV=1	Acaa1a	26	6	64	2	43.9	4.48492e+06	4.53795e+06	4.68432e+06	2.48937e+06	6.22214e+06	2.41332e+06	7156417	3.51231e+06	6.28089e+06	3.93487e+06	2.1244e+06	5.55824e+06	2.77825e+06	2.34807e+06	5.19717e+06	3.20823e+06	3.73031e+06	6.12988e+06
Q9QZM0	Ubiquilin-2 OS=Mus musculus OX=10090 GN=Ubqln2 PE=1 SV=2	Ubqln2	7	3	13	2	67.3	1.75088e+07	1.57584e+07	1.67488e+07	1.46783e+07	1.24301e+07	1.61823e+07	14853623	1.82402e+07	1.08174e+07	1.77042e+07	1.86104e+07	9.96073e+06	1.99794e+07	1.40253e+07	1.81875e+07	2.12749e+07	1.79514e+07	2.01322e+07
Q9QY76	Vesicle-associated membrane protein-associated protein B OS=Mus musculus OX=10090 GN=Vapb PE=1 SV=3	Vapb	42	9	214	8	26.9	2.87169e+07	3.17614e+07	2.66236e+07	2.06083e+07	3.83878e+07	3.87951e+07	2.87703e+07	3.4777e+07	5.25891e+07	3.61269e+07	2.55889e+07	4.18021e+07	4.22348e+07	3.78162e+07	5.00065e+07	3.26671e+07	3.68388e+07	3.35051e+07
Q9JMD0	BUB3-interacting and GLEBS motif-containing protein ZNF207 OS=Mus musculus OX=10090 GN=Znf207 PE=1 SV=1	Znf207	3	1	6	1	52.8	321304	388595			99683.7			285199	284745	1.57441e+06	293572	252987			822969	431391	240696	315904
P52479	Ubiquitin carboxyl-terminal hydrolase 10 OS=Mus musculus OX=10090 GN=Usp10 PE=1 SV=3	Usp10	5	2	3	2	87							456213		486796	519954		412894		663663
Q6P4T2	U5 small nuclear ribonucleoprotein 200 kDa helicase OS=Mus musculus OX=10090 GN=Snrnp200 PE=1 SV=1	Snrnp200	3	5	35	5	244.4	3.57336e+06	3.97762e+06	3.65807e+06	3.99814e+06	3.64271e+06	1.88791e+06	2.6223e+06	2.5666e+06	4.16275e+06	2.7825e+06	1.88486e+06	2.50132e+06	2.58115e+06	1.16549e+06	2.93662e+06	2.08536e+06	2.40829e+06	1.73042e+06
Q8BWQ1	UDP-glucuronosyltransferase 2A3 OS=Mus musculus OX=10090 GN=Ugt2a3 PE=1 SV=1	Ugt2a3	5	2	2	2	61.1							348608	161499										77830.8
P27641	X-ray repair cross-complementing protein 5 OS=Mus musculus OX=10090 GN=Xrcc5 PE=1 SV=4	Xrcc5	3	1	4	1	83				340958		160236	141004	195232	211246	203942		198626		193385			808775
Q9CQ80	Vacuolar protein-sorting-associated protein 25 OS=Mus musculus OX=10090 GN=Vps25 PE=1 SV=1	Vps25	28	4	32	4	20.7	1.99226e+06	3.69815e+06	1.32465e+06	1.71915e+06	2.17458e+06	1.95119e+06	2.02106e+06	2.75809e+06	2.59788e+06	2.9587e+06	2.92477e+06	2.64177e+06	1.62416e+06	2.36213e+06	1.81214e+06	2.30553e+06	2.93642e+06	2.753e+06
Q921T2	Torsin-1A-interacting protein 1 OS=Mus musculus OX=10090 GN=Tor1aip1 PE=1 SV=3	Tor1aip1	17	8	64	7	66.7	6.03425e+06	7.60372e+06	7.27983e+06	8.24434e+06	9.48973e+06	6.39469e+06	6.28389e+06	6.71823e+06	1.08507e+07	6.1406e+06	5.66244e+06	9.63028e+06	7.58437e+06	7.87473e+06	1.38571e+07	7.31231e+06	6.85806e+06	7.35593e+06
P61089	Ubiquitin-conjugating enzyme E2 N OS=Mus musculus OX=10090 GN=Ube2n PE=1 SV=1	Ube2n	54	8	128	8	17.1	6.77133e+07	6.23402e+07	5.34769e+07	6.02679e+07	7.58874e+07	5.16658e+07	5.18588e+07	4.94177e+07	5.60633e+07	5.59381e+07	4.7984e+07	5.49304e+07	5.0678e+07	5.41993e+07	4.94921e+07	4.99455e+07	5.33188e+07	4.88591e+07
Q8VCH8	UBX domain-containing protein 4 OS=Mus musculus OX=10090 GN=Ubxn4 PE=1 SV=1	Ubxn4	7	3	33	3	56.4	922555	1.07767e+06	1.19029e+06	1.07916e+06	1.58957e+06	970615	1.12677e+06	966041	937859	1.04742e+06	796419	902322	877984	913366	937923	902767	966644	1.22029e+06
P63280	SUMO-conjugating enzyme UBC9 OS=Mus musculus OX=10090 GN=Ube2i PE=1 SV=1	Ube2i	39	3	15	3	18	373000	241425	1.45132e+06	1.3877e+06	1.86492e+06	1.12426e+06	1.31312e+06	1.51541e+06	1.07309e+06	1.13572e+06	1.26798e+06	1.03856e+06	1.26877e+06	189153	2.60779e+06	215598	1.59219e+06	1.42585e+06
Q5BKP2	Ubiquitin carboxyl-terminal hydrolase 13 OS=Mus musculus OX=10090 GN=Usp13 PE=1 SV=1	Usp13	11	5	35	5	96.7	5.04266e+06	4.30527e+06	7.01698e+06	4.63955e+06	4.82596e+06	3.17506e+06	4.36023e+06	4.41884e+06	6.24975e+06	4.58059e+06	3.67439e+06	4.1417e+06	2.58989e+06	3.70239e+06	4.38301e+06	2.80746e+06	4.60774e+06	4.2737e+06
P62814	V-type proton ATPase subunit B, brain isoform OS=Mus musculus OX=10090 GN=Atp6v1b2 PE=1 SV=1	Atp6v1b2	12	4	24	4	56.5	2.29584e+06	2.26707e+06	1.87161e+06	3.0719e+06	2.83841e+06	1.54835e+06	2.28391e+06	3.20312e+06	2.83733e+06	1.8679e+06	2.98987e+06	2.34624e+06	3.05142e+06	3.81957e+06	4.47344e+06	2.85359e+06	2.35594e+06	3.16726e+06
Q3U4G3	Xyloside xylosyltransferase 1 OS=Mus musculus OX=10090 GN=Xxylt1 PE=1 SV=2	Xxylt1	2	1	34	1	43.8	8.63409e+06	9.49851e+06	8.8819e+06	1.37301e+07	6.4556e+06	6.73016e+06	7.04793e+06	9.36288e+06	1.13187e+07	1.06939e+07	7.09687e+06	1.05871e+07	1.01964e+07	8.7697e+06	5.15478e+06	7.5255e+06	9.27101e+06	8.53681e+06
Q8K031	StAR-related lipid transfer protein 8 OS=Mus musculus OX=10090 GN=Stard8 PE=1 SV=2	Stard8	4	1	4	1	113																		945407
Q9CQ26	STAM-binding protein OS=Mus musculus OX=10090 GN=Stambp PE=1 SV=1	Stambp	5	1	12	1	48.5	296364	251602	359909	335846	326223	140266	315329	219748	265849	185198	258041	121383	164511	337823	449952	399890	373460	342523
Q91YN5	UDP-N-acetylhexosamine pyrophosphorylase OS=Mus musculus OX=10090 GN=Uap1 PE=1 SV=1	Uap1	2	1	13	1	58.6	191934	246837	265853	384261	391175	111630	202196	180455	253609	222470	145972	190086	211951	201513	242741	234975	115567
P50516	V-type proton ATPase catalytic subunit A OS=Mus musculus OX=10090 GN=Atp6v1a PE=1 SV=2	Atp6v1a	19	11	119	11	68.3	6.29861e+06	6.58686e+06	5.44397e+06	6.64858e+06	8.4455e+06	6.24281e+06	5.22827e+06	6.59705e+06	7.53276e+06	5.79612e+06	5.702e+06	6.25568e+06	6.30294e+06	7.34704e+06	9.60786e+06	6.27512e+06	6.46311e+06	6.52693e+06
P21614	Vitamin D-binding protein OS=Mus musculus OX=10090 GN=Gc PE=1 SV=2	Gc	48	18	222	18	53.6	1.71827e+07	1.34853e+07	2.66702e+07	1.07545e+07	2.07246e+07	9.00717e+06	1.24507e+07	1.70918e+07	2.7445e+07	1.28527e+07	1.87551e+07	1.20218e+07	8.60932e+06	8.00191e+06	4.60598e+07	1.78413e+07	1.35544e+07	1.64994e+07
Q99PL6	UBX domain-containing protein 6 OS=Mus musculus OX=10090 GN=Ubxn6 PE=1 SV=1	Ubxn6	12	3	30	3	49.8	498383	459310	521606	552821	967378	749138	772100	295078	189449	202260	714381	409561	752883	438160	475566	476574	369620	348027
P26369	Splicing factor U2AF 65 kDa subunit OS=Mus musculus OX=10090 GN=U2af2 PE=1 SV=3	U2af2	7	3	22	3	53.5	1.55772e+06	1.1316e+06	1.31521e+06	1.64735e+06	2.0396e+07	1.34043e+06	1.03075e+06	1.13681e+06	1.12336e+07	2.22803e+06	2.25591e+06	8.92742e+06	1.82388e+06	2.7287e+06	3.25079e+06	1.90851e+06	1.89525e+06	2.32574e+06
Q922Y1	UBX domain-containing protein 1 OS=Mus musculus OX=10090 GN=Ubxn1 PE=1 SV=1	Ubxn1	49	10	107	10	33.6	1.15695e+07	1.03349e+07	1.05584e+07	1.13037e+07	4.6549e+06	1.09243e+07	1.23644e+07	1.39745e+07	7.86057e+06	1.16246e+07	1.42786e+07	7.83297e+06	1.00173e+07	1.0675e+07	1.0382e+07	9.50534e+06	9.8246e+06	9.9852e+06
Q4U4S6	Xin actin-binding repeat-containing protein 2 OS=Mus musculus OX=10090 GN=Xirp2 PE=1 SV=1	Xirp2	10	31	211	31	428	2.9978e+07	4.32622e+07	2.57569e+07	3.36602e+07	3.71181e+07	2.06586e+07	2.9339e+07	3.6823e+07	4.18481e+07	3.64282e+07	5.06161e+07	3.94568e+07	2.65556e+07	3.74625e+07	4.60425e+07	2.18527e+07	2.77064e+07	2.46308e+07
Q8BY87	Ubiquitin carboxyl-terminal hydrolase 47 OS=Mus musculus OX=10090 GN=Usp47 PE=1 SV=2	Usp47	13	13	105	13	157.4	4.32747e+06	4.57552e+06	4.24534e+06	3.97931e+06	5.43454e+06	3.14401e+06	4.22675e+06	3.21471e+06	4.74638e+06	2.68001e+06	2.41292e+06	3.45959e+06	2.43762e+06	3.98598e+06	4.48012e+06	3.27439e+06	3.95246e+06	4.41571e+06
Q6ZPJ3	(E3-independent) E2 ubiquitin-conjugating enzyme UBE2O OS=Mus musculus OX=10090 GN=Ube2o PE=1 SV=3	Ube2o	4	4	40	4	140.7	1.35121e+06	1.16653e+06	1.01736e+06	1.05443e+06	1.04319e+06	1.21446e+06	1.4299e+06	1.40167e+06	1.37686e+06	808266	812055	865022	538291	664547	1.07086e+06	1.38288e+06	1.66756e+06	1.69392e+06
P54310	Hormone-sensitive lipase OS=Mus musculus OX=10090 GN=Lipe PE=1 SV=2	Lipe	28	15	37	15	83.3	4.65404e+06	4.65445e+06	4.70406e+06	789664	1.03588e+06	4.29359e+06	5.54808e+06	5.14191e+06	6.23961e+06	2.65925e+06	2.62442e+06	2.98435e+06	2.91041e+06	3.95524e+06	1.65801e+07	3.75824e+06	4.30532e+06	4.77955e+06
Q8BZW8	NHL repeat-containing protein 2 OS=Mus musculus OX=10090 GN=Nhlrc2 PE=1 SV=1	Nhlrc2	7	4	26	4	78.4	1.8558e+06	732087	1.11488e+06	893107	1.98629e+06	331324	424064	1.23376e+06	1.97199e+06	2.15573e+06	1.77678e+06	2.12775e+06	1.27347e+06	1.70617e+06	1.85248e+06	1.4992e+06	1.89082e+06	1.6562e+06
Q9D6J5	NADH dehydrogenase [ubiquinone] 1 beta subcomplex subunit 8, mitochondrial OS=Mus musculus OX=10090 GN=Ndufb8 PE=1 SV=1	Ndufb8	49	8	187	8	21.9	4.87327e+07	3.24104e+07	2.41995e+07	3.52902e+07	6.13809e+07	2.21448e+07	2.69711e+07	2.06431e+07	4.16478e+07	3.42807e+07	1.90694e+07	3.39826e+07	2.83657e+07	2.33844e+07	2.77769e+07	3.40862e+07	3.30381e+07	3.06634e+07
Q91WD5	NADH dehydrogenase [ubiquinone] iron-sulfur protein 2, mitochondrial OS=Mus musculus OX=10090 GN=Ndufs2 PE=1 SV=1	Ndufs2	60	19	435	19	52.6	6.48878e+08	6.8395e+08	7.49247e+08	8.50884e+08	1.07987e+09	7.73764e+08	6.65425e+08	5.54961e+08	6.00918e+08	6.74557e+08	6.14924e+08	6.41359e+08	6.69107e+08	6.9014e+08	5.32653e+08	6.7316e+08	7.31367e+08	6.3451e+08
P09405	Nucleolin OS=Mus musculus OX=10090 GN=Ncl PE=1 SV=2	Ncl	19	13	163	13	76.7	1.35437e+07	1.78198e+07	1.68489e+07	1.88621e+07	2.41784e+07	1.72264e+07	1.49659e+07	1.83962e+07	2.64782e+07	2.50849e+07	1.62824e+07	2.32563e+07	2.28882e+07	1.01708e+07	3.80998e+07	1.81371e+07	2.56322e+07	2.46069e+07
Q4VA53	Sister chromatid cohesion protein PDS5 homolog B OS=Mus musculus OX=10090 GN=Pds5b PE=1 SV=1	Pds5b	2	2	21	1	164.3	224421	227239	112862	247126	166217	66938.6	108239	138923	227752		170084	197795	165040	170520	325074	211944	217284	343849
Q66GT5	Phosphatidylglycerophosphatase and protein-tyrosine phosphatase 1 OS=Mus musculus OX=10090 GN=Ptpmt1 PE=1 SV=1	Ptpmt1	16	2	8	2	21.9	1.17783e+06	1.28475e+06	872967	1.74195e+06	2.03049e+06	655019	645877	720701	555961	576155		323272	617686	317680	576756	337405	939097	437091
P05366	Serum amyloid A-1 protein OS=Mus musculus OX=10090 GN=Saa1 PE=1 SV=2	Saa1	30	3	4	2	13.8					231361		340269	180026	450650	4.39873e+06	238742	116845			397804	270839		358081
Q8C1Q6	Small integral membrane protein 4 OS=Mus musculus OX=10090 GN=Smim4 PE=1 SV=2	Smim4	15	2	5	2	9.7	961169		172228		1.08304e+06			256241	858559	506697	167674	330752				245588	617415	293692
Q8CI12	Smoothelin-like protein 2 OS=Mus musculus OX=10090 GN=Smtnl2 PE=1 SV=1	Smtnl2	29	11	149	11	49.5	2.29777e+07	2.2329e+07	2.74267e+07	2.39608e+07	2.50484e+07	3.08542e+07	2.38884e+07	2.98948e+07	3.31913e+07	3.17161e+07	2.4047e+07	2.88754e+07	2.60315e+07	2.82041e+07	2.31719e+07	2.74162e+07	3.04272e+07	3.11576e+07
Q8CEZ1	Single-pass membrane and coiled-coil domain-containing protein 1 OS=Mus musculus OX=10090 GN=Smco1 PE=2 SV=3	Smco1	6	1	16	1	24.5	397081	320503	364601	327308	284885	479146	498591	481131	299194	400633	311975	264732	290851	449953	236351	279223	365010	408093
Q8CBY1	Protein Smaug homolog 1 OS=Mus musculus OX=10090 GN=Samd4a PE=1 SV=2	Samd4a	2	1	8	1	78.3	190354	210928	241958	220387	358579	108224	147573	135758	256278	191901	159613	202535	90710.9	175468	147988	155764	147631	126107
P62311	U6 snRNA-associated Sm-like protein LSm3 OS=Mus musculus OX=10090 GN=Lsm3 PE=1 SV=2	Lsm3	33	2	6	2	11.8					504956			668649	1.33968e+06	486731	669221	398009	602807	293228	922249		361527
P14152	Malate dehydrogenase, cytoplasmic OS=Mus musculus OX=10090 GN=Mdh1 PE=1 SV=3	Mdh1	38	13	364	13	36.5	4.68481e+08	3.13506e+08	2.50485e+08	4.18317e+08	5.58906e+08	2.98193e+08	3.56946e+08	3.29672e+08	5.58137e+08	3.81158e+08	2.61548e+08	4.56468e+08	3.89545e+08	3.01941e+08	2.99229e+08	3.3566e+08	3.59774e+08	2.61582e+08
Q9CW42	Mitochondrial amidoxime-reducing component 1 OS=Mus musculus OX=10090 GN=Mtarc1 PE=1 SV=2	Mtarc1	5	1	6	1	38	17647.9	22924.2	60611.5	33587.3	50338.8	18429.6	232402	49989.8	130738		10315.1	51178.5	15525.8		158867	38475		46860.8
O35682	Myeloid-associated differentiation marker OS=Mus musculus OX=10090 GN=Myadm PE=1 SV=2	Myadm	6	2	20	2	35.3	1.22872e+06	1.48325e+06	922352	2.98822e+06	2.30311e+06		1.05078e+06	1.60028e+06	2.57451e+06	2.02464e+06	767058				1.06064e+06	1.30832e+06	1.75866e+06	1.65577e+06
P13542	Myosin-8 OS=Mus musculus OX=10090 GN=Myh8 PE=2 SV=2	Myh8	57	201	25415	14	222.6	2.79582e+08	2.80366e+08	6.90498e+07	3.72803e+08	1.00301e+09	2.50098e+08	4.36036e+08	2.81151e+08	7.43556e+08	5.59665e+08	1.52407e+08	2.60475e+08	5.22402e+08	2.47094e+08	1.46365e+08	4.81627e+08	4.88568e+08	2.98327e+08
P97300	Neuroplastin OS=Mus musculus OX=10090 GN=Nptn PE=1 SV=3	Nptn	12	4	42	4	44.3	3.64146e+06	3.67101e+06	2.45161e+06	1.8673e+06	2.87088e+06	3.03209e+06	3.67698e+06	4.11032e+06	4.12376e+06	3.15034e+06	3.26802e+06	3.14688e+06	2.61645e+06	3.86017e+06	4.52837e+06	3.06242e+06	3.53368e+06	3.83239e+06
P67778	Prohibitin OS=Mus musculus OX=10090 GN=Phb PE=1 SV=1	Phb	65	13	249	13	29.8	5.96962e+07	4.10075e+07	3.74384e+07	4.87498e+07	7.74371e+07	3.68015e+07	48750134	3.53906e+07	6.37391e+07	4.30315e+07	3.10713e+07	5.65441e+07	3.70585e+07	3.45639e+07	4.07409e+07	4.17503e+07	4.75799e+07	3.53902e+07
P47857	ATP-dependent 6-phosphofructokinase, muscle type OS=Mus musculus OX=10090 GN=Pfkm PE=1 SV=3	Pfkm	61	36	1712	32	85.2	1.53535e+09	1.73189e+09	1.74266e+09	1.62904e+09	1.52188e+09	1.61638e+09	1.66925e+09	1.81146e+09	1.48788e+09	1.76703e+09	1.95565e+09	1.82001e+09	1.69598e+09	1.57857e+09	1.36876e+09	1.48355e+09	1.75846e+09	1.7925e+09
P36993	Protein phosphatase 1B OS=Mus musculus OX=10090 GN=Ppm1b PE=1 SV=1	Ppm1b	45	11	161	10	42.8	5.45689e+06	7.3433e+06	5.57963e+06	5.94981e+06	9.47368e+06	7.14025e+06	6.87317e+06	6.26182e+06	8.07915e+06	1.05858e+07	6.39801e+06	8.31686e+06	8.83981e+06	6.5174e+06	6.11211e+06	6.49187e+06	7.79361e+06	7.82027e+06
P26350	Prothymosin alpha OS=Mus musculus OX=10090 GN=Ptma PE=1 SV=2	Ptma	13	2	10	2	12.2	926691	456133	245351	841607	484088		420518	983711	1.60849e+06	1.04865e+06	272616		616900		1.02402e+06	681198	288427	341995
Q9JIW9	Ras-related protein Ral-B OS=Mus musculus OX=10090 GN=Ralb PE=1 SV=1	Ralb	19	4	43	2	23.3	3.6235e+06	2.57559e+06	2.15613e+06	2.35877e+06	4.21035e+06	2.16294e+06	3.02157e+06	2.35188e+06	4.28704e+06	3.74709e+06	2.74472e+06	2.98592e+06	3.48419e+06	3.64332e+06	4.78192e+06	3.29905e+06	3.51086e+06	3.12086e+06
Q9DCU6	39S ribosomal protein L4, mitochondrial OS=Mus musculus OX=10090 GN=Mrpl4 PE=1 SV=1	Mrpl4	8	2	21	2	33.1	1.20406e+06	991284	371224	1.33694e+06	1.63419e+06	643633	408475	799858	1.51048e+06	981098	895765	1.07566e+06	698923	749063	884813	507764	973757	877018
P62281	40S ribosomal protein S11 OS=Mus musculus OX=10090 GN=Rps11 PE=1 SV=3	Rps11	34	6	56	6	18.4	2.7647e+07	2.10482e+07	2.16781e+07	2.50058e+07	1.18275e+07	2.92998e+07	2.55807e+07	2.13663e+07	5.89912e+07	1.80466e+07	1.73313e+07	1.25286e+07	2.25603e+07	2.00516e+07	2.58806e+07	2.21681e+07	1.47651e+07	2.65168e+07
P63325	40S ribosomal protein S10 OS=Mus musculus OX=10090 GN=Rps10 PE=1 SV=1	Rps10	37	6	138	6	18.9	1.16467e+07	1.78715e+07	1.5177e+07	2.56568e+07	2.02783e+07	1.74759e+07	1.70238e+07	1.0709e+07	1.31101e+07	1.26304e+07	1.07331e+07	7.42011e+06	1.06414e+07	1.5795e+07	2.13366e+07	1.6394e+07	2.61371e+07	1.80515e+07
Q9JIK9	28S ribosomal protein S34, mitochondrial OS=Mus musculus OX=10090 GN=Mrps34 PE=1 SV=1	Mrps34	4	1	15	1	25.8	344438	421633	277115	513617	553827	250937	248110	234200	302928	206467	131758	273532	246577	194853	207344	234860	416913	260894
P61620	Protein transport protein Sec61 subunit alpha isoform 1 OS=Mus musculus OX=10090 GN=Sec61a1 PE=1 SV=2	Sec61a1	10	4	33	2	52.2	3.33216e+06	2.26267e+06	1.32747e+06	1.73934e+06	2.90833e+06	1.5912e+06	3.86853e+06	2.10268e+06	1.98653e+06	3.00405e+06	2.46394e+06	4.94312e+06	2.56603e+06	3.4638e+06	5.10234e+06	3.39877e+06	2.49113e+06	3.83673e+06
Q6P6M7	O-phosphoseryl-tRNA(Sec) selenium transferase OS=Mus musculus OX=10090 GN=Sepsecs PE=1 SV=2	Sepsecs	6	2	30	2	55.3	1.39195e+07	1.01554e+07	5.11273e+06	1.02546e+07	1.3905e+07	1.59853e+07	12798427	8.11957e+06	1.40037e+07	1.4665e+07	7.37832e+06	1.99009e+07	1.30703e+07	9.88662e+06	7.26614e+06	1.33915e+07	1.48451e+07	9.28592e+06
Q8R1X6	Spartin OS=Mus musculus OX=10090 GN=Spart PE=1 SV=1	Spart	8	3	31	3	72.6	740583	688903	595932	730486	255020	556995	826298	643152	1.01039e+06	866826	600902	691275	762823	773809	732964	854861	869867	794114
Q8BJD1	Inter-alpha-trypsin inhibitor heavy chain H5 OS=Mus musculus OX=10090 GN=Itih5 PE=1 SV=1	Itih5	2	2	21	2	106.7	882861	690119	503118	833119	626114	448566	627119	462187	659880	475342	522750	600873	530125	674209	828722	589394	747680	850473
Q9D8B7	Junctional adhesion molecule C OS=Mus musculus OX=10090 GN=Jam3 PE=1 SV=2	Jam3	3	1	6	1	34.8	2.2666e+06	1.64657e+06	1.85411e+06	1.965e+06	2.34465e+06	4.33932e+06	2.92133e+06	3.77805e+06	2.00071e+06	2.67756e+06	4.5062e+06	3.83073e+06	2.73296e+06	3.1873e+06	4.85041e+06	3.64579e+06	1.47373e+06
Q9R0Y5	Adenylate kinase isoenzyme 1 OS=Mus musculus OX=10090 GN=Ak1 PE=1 SV=1	Ak1	75	17	1434	17	21.5	1.02169e+09	1.21613e+09	1.08967e+09	1.09781e+09	8.51097e+08	1.09387e+09	9.67418e+08	1.01517e+09	9.61172e+08	9.99507e+08	1.16712e+09	7.83355e+08	9.63096e+08	8.774e+08	9.07523e+08	8.11538e+08	1.05758e+09	8.99379e+08
P31324	cAMP-dependent protein kinase type II-beta regulatory subunit OS=Mus musculus OX=10090 GN=Prkar2b PE=1 SV=3	Prkar2b	13	3	24	2	46.1									119904						635000
P08551	Neurofilament light polypeptide OS=Mus musculus OX=10090 GN=Nefl PE=1 SV=5	Nefl	33	18	172	17	61.5	5.50069e+06	1.24448e+07	1.93455e+06	9.28209e+06	5.59515e+07	5.50941e+06	6.83603e+06	3.10752e+07	8.97403e+06	6.63947e+06	5.62792e+06	6.96529e+06	2.19891e+07	4.47916e+07	1.97133e+07	9.64863e+06	3.44217e+07	1.07716e+07
Q3UW53	Protein Niban 1 OS=Mus musculus OX=10090 GN=Niban1 PE=1 SV=2	Niban1	10	5	33	5	102.6	1.35786e+06	1.46698e+06	834126	1.6134e+06	1.88793e+06	948224	677828	480116	1.51053e+06	883764	1.17504e+06	1.22639e+06	1.11293e+06	729197	2.45534e+06	1.08658e+06	1.25021e+06	573177
P62137	Serine/threonine-protein phosphatase PP1-alpha catalytic subunit OS=Mus musculus OX=10090 GN=Ppp1ca PE=1 SV=1	Ppp1ca	57	12	216	2	37.5	2.06159e+06	2.79555e+06	2.05073e+06	5.78451e+06	4.60398e+06	2.2209e+06	2.14324e+06	2.77475e+06	3.49964e+06	2.00359e+06	1.52198e+06	1.90669e+06	1.42207e+06	2.01816e+06	2.38194e+06	2.56136e+06	1.55457e+06	2.12536e+06
P32848	Parvalbumin alpha OS=Mus musculus OX=10090 GN=Pvalb PE=1 SV=3	Pvalb	79	16	1237	16	11.9	3.97714e+09	4.09265e+09	5.31997e+09	4.47602e+09	4.01716e+09	3.95035e+09	3.6003e+09	3.74711e+09	4.90602e+09	3.87037e+09	4.65895e+09	3.33755e+09	3.47108e+09	2.91815e+09	4.50646e+09	2.85605e+09	4.30166e+09	3.78443e+09
P70698	CTP synthase 1 OS=Mus musculus OX=10090 GN=Ctps1 PE=1 SV=2	Ctps1	11	5	58	5	66.6	2.23323e+06	2.05851e+06	2.25395e+06	2.06347e+06	2.61824e+06	2.93473e+06	2.62517e+06	1.34046e+06	1.22573e+06	1.57322e+06	3.06069e+06	1.03351e+06	1.32496e+06	3.14263e+06	1.63117e+06	1.66259e+06	2.24319e+06	1.99167e+06
Q9D1N9	39S ribosomal protein L21, mitochondrial OS=Mus musculus OX=10090 GN=Mrpl21 PE=1 SV=1	Mrpl21	22	3	5	3	23.4	1.02346e+06	768365	692204	1.14257e+06	1.67083e+06	37403.1	886934	31934.2	1.68689e+06	947953	37681.6	46682.4	33564.1	29575.7	42075.7	384923	1.44635e+06	34453.3
Q9CQE3	28S ribosomal protein S17, mitochondrial OS=Mus musculus OX=10090 GN=Mrps17 PE=1 SV=1	Mrps17	8	1	18	1	13.4	356797	589889	160930	416858	297997	515957	596287	352450	879834	494733	289748	695912	326941	272890		449849	344395	362003
Q924T2	28S ribosomal protein S2, mitochondrial OS=Mus musculus OX=10090 GN=Mrps2 PE=1 SV=1	Mrps2	17	3	30	3	32.3	1.98516e+06	1.5446e+06	624756	1.83739e+06	3.54436e+06	1.29498e+06	1.10992e+06	1.03298e+06	2.03482e+06	2.16226e+06	1.04746e+06	1.17716e+06	1.35199e+06	1.6783e+06	835547	1.19752e+06	1.73448e+06	1.23774e+06
Q9JJU8	SH3 domain-binding glutamic acid-rich-like protein OS=Mus musculus OX=10090 GN=Sh3bgrl PE=1 SV=1	Sh3bgrl	54	4	21	4	12.8	1.1363e+06	397386		414100	1.09811e+06	282372	576908	1.48286e+06	3.68047e+06	1.52397e+06	1.47654e+06	1.31742e+06	882929	1.60915e+06	6.42325e+06	1.22682e+06	1.4989e+06	1.64914e+06
Q8VD57	Vesicle transport protein SFT2B OS=Mus musculus OX=10090 GN=Sft2d2 PE=1 SV=1	Sft2d2	6	1	3	1	17.5	620032	416376	532407	425825	551107	240729	401768	296349	298191		336769	376429	396562		418654		258939	359552
Q8BRF7	Sec1 family domain-containing protein 1 OS=Mus musculus OX=10090 GN=Scfd1 PE=1 SV=1	Scfd1	4	1	5	1	72.3			193890	220321	294230		81373.6				54683					80508.6	310607
Q9QYS9	Protein quaking OS=Mus musculus OX=10090 GN=Qki PE=1 SV=1	Qki	3	1	3	1	37.6					298086		138857		330381					175306	64424.8	112158	97810.5
Q9JJH1	Ribonuclease 4 OS=Mus musculus OX=10090 GN=Rnase4 PE=1 SV=1	Rnase4	9	1	14	1	17	258751	321777		339658	460401	143683	309385	198459	256417	320281	274870	250981	171987	293275	184821	204807	217596	172769
Q8BK72	28S ribosomal protein S27, mitochondrial OS=Mus musculus OX=10090 GN=Mrps27 PE=1 SV=2	Mrps27	20	7	61	7	47.7	3.78929e+06	1.46346e+06	1.53634e+06	3.13792e+06	4.37924e+06	2.07957e+06	2.28089e+06	2.03369e+06	4.11026e+06	3.24846e+06	2.25746e+06	3.36315e+06	2.4991e+06	2.32712e+06	2.28199e+06	2.10293e+06	2.03958e+06	2.02693e+06
Q9CQE8	RNA transcription, translation and transport factor protein OS=Mus musculus OX=10090 GN=RTRAF PE=1 SV=1	RTRAF	32	6	55	6	28.1	5.46114e+06	5.6364e+06	4.80325e+06	6.98553e+06	6.46268e+06	4.19095e+06	3.17477e+06	5.535e+06	5.09305e+06	5.00015e+06	3.61893e+06	4.62121e+06	3.64747e+06	4.77839e+06	4.24733e+06	2.42605e+06	5.8882e+06	3.61483e+06
P55012	Solute carrier family 12 member 2 OS=Mus musculus OX=10090 GN=Slc12a2 PE=1 SV=2	Slc12a2	1	2	20	2	131	372616	419811	321163	395572	515861	413430	383252	365134	364291	346126	298055	319035	85052.6	375121	306593	311222	582634	490442
Q5SWT3	Solute carrier family 25 member 35 OS=Mus musculus OX=10090 GN=Slc25a35 PE=1 SV=2	Slc25a35	3	1	2	1	32.6			194707	365839		375408		216969	228296		142258	318954	356398	199966	409567
Q99NB9	Splicing factor 3B subunit 1 OS=Mus musculus OX=10090 GN=Sf3b1 PE=1 SV=1	Sf3b1	7	7	12	7	145.7	3.79327e+07	4.99015e+07	5.68742e+07	4.86617e+07	5.41892e+07	2.81202e+07	4.10919e+07	4.65732e+07	4.41207e+07	5.51333e+07	5.30494e+07	3.30913e+07	4.71712e+07	4.61422e+07	4.2639e+07	6.32552e+07	4.80576e+07	4.35085e+07
Q9ERG2	Striatin-3 OS=Mus musculus OX=10090 GN=Strn3 PE=1 SV=1	Strn3	6	4	37	4	87.1	3.19568e+06	3.42096e+06	2.81013e+06	2.98991e+06	3.92525e+06	3.23417e+06	3.25445e+06	3.24581e+06	3.31892e+06	3.35732e+06	2.73846e+06	3.28556e+06	3.92347e+06	3.96871e+06	4.45512e+06	3.65089e+06	3.21466e+06	3.33297e+06
O89086	RNA-binding protein 3 OS=Mus musculus OX=10090 GN=Rbm3 PE=1 SV=1	Rbm3	24	3	57	3	16.6	3.12955e+06	4.02377e+06	2.49149e+06	6.46908e+06	6.76002e+06	4.47879e+06	3.11684e+06	2.43615e+06	3.92107e+06	4.06557e+06	3.1299e+06	2.65519e+06	3.38898e+06	2.43141e+06	6.10548e+06	4.10186e+06	3.20247e+06	3.35817e+06
Q9CPR4	60S ribosomal protein L17 OS=Mus musculus OX=10090 GN=Rpl17 PE=1 SV=3	Rpl17	31	4	64	4	21.4	4.1042e+06	5.18442e+06	4.55864e+06	5.85398e+06	5.6353e+06	4.3678e+06	5.40155e+06	6.73899e+06	1.08444e+07	5.54227e+06	7.3688e+06	7.49231e+06	6.17813e+06	6.72556e+06	1.10101e+07	5.75511e+06	6.52127e+06	6.97781e+06
Q9CZM2	60S ribosomal protein L15 OS=Mus musculus OX=10090 GN=Rpl15 PE=1 SV=4	Rpl15	46	10	124	10	24.1	1.27067e+07	1.36602e+07	1.20864e+07	1.46961e+07	2.15949e+07	1.69295e+07	1.50363e+07	1.64341e+07	1.833e+07	1.59228e+07	1.62055e+07	1.42614e+07	1.76199e+07	1.71423e+07	2.47197e+07	1.95106e+07	1.92002e+07	1.97212e+07
Q99020	Heterogeneous nuclear ribonucleoprotein A/B OS=Mus musculus OX=10090 GN=Hnrnpab PE=1 SV=1	Hnrnpab	25	6	85	5	30.8	2.25993e+07	3.17236e+07	3.08118e+07	3.19358e+07	2.64571e+07	2.98153e+07	2.08018e+07	2.48385e+07	1.78405e+07	2.25215e+07	2.84894e+07	1.84637e+07	2.87252e+07	2.68482e+07	2.84779e+07	2.1391e+07	2.44469e+07	2.73143e+07
Q6ZWY3	40S ribosomal protein S27-like OS=Mus musculus OX=10090 GN=Rps27l PE=1 SV=3	Rps27l	23	2	22	1	9.5	2.3399e+06	1.58318e+06	1.64014e+06	658443	894844	2.74167e+06	2.51538e+06	2.43541e+06	2.77776e+06	1.52328e+06	1.15084e+06	933133	1.26449e+06	1.99879e+06	3.74647e+06	1.6436e+06	1.96199e+06	1.89797e+06
Q91W34	RUS family member 1 OS=Mus musculus OX=10090 GN=Rusf1 PE=1 SV=1	Rusf1	2	1	4	1	50.4	77320.6	132778	132718	176831	191083	71265.9	86751.1	87880	187669	77083.3	71532.4	91741	45833.7	107945	202029	72457.6	85216.7	119690
Q99K85	Phosphoserine aminotransferase OS=Mus musculus OX=10090 GN=Psat1 PE=1 SV=1	Psat1	3	1	1	1	40.4					181807		167977		321022						759819
P82349	Beta-sarcoglycan OS=Mus musculus OX=10090 GN=Sgcb PE=1 SV=1	Sgcb	41	8	77	8	34.9	3.47763e+07	5.49541e+07	4.42422e+07	4.90529e+07	3.76054e+07	3.8291e+07	3.40677e+07	3.63098e+07	2.92469e+07	3.63422e+07	2.88848e+07	2.91305e+07	2.7427e+07	2.41326e+07	3.11642e+07	3.79369e+07	3.59823e+07	3.85693e+07
O55201	Transcription elongation factor SPT5 OS=Mus musculus OX=10090 GN=Supt5h PE=1 SV=1	Supt5h	3	2	6	2	120.6		228449	145276					53924.4		57070.5	59337.7				532526		237133	297344
Q9DB77	Cytochrome b-c1 complex subunit 2, mitochondrial OS=Mus musculus OX=10090 GN=Uqcrc2 PE=1 SV=1	Uqcrc2	47	16	405	16	48.2	5.4762e+08	3.56389e+08	2.70841e+08	3.59381e+08	5.19414e+08	3.16659e+08	3.86437e+08	3.62381e+08	5.41531e+08	4.46724e+08	3.15085e+08	4.83159e+08	4.22095e+08	3.00109e+08	3.0506e+08	3.57649e+08	4.37091e+08	3.62535e+08
Q8BP92	Reticulocalbin-2 OS=Mus musculus OX=10090 GN=Rcn2 PE=1 SV=1	Rcn2	32	6	66	6	37.2	1.57347e+06	1.60851e+06	3.4349e+06	2.19655e+06	4.06561e+06	2.42563e+06	735825	3.45098e+06	3.33082e+06	1.79869e+06	3.1585e+06	2.75546e+06	2.53923e+06	2.55749e+06	3.82336e+06	2.65135e+06	3.29893e+06	2.58964e+06
Q99N93	39S ribosomal protein L16, mitochondrial OS=Mus musculus OX=10090 GN=Mrpl16 PE=1 SV=1	Mrpl16	3	1	13	1	28.8	311842	256538	147629	354676	434535	204223	225365	227334	283569	292098	228448	213455	213418	168397	120378	153325	209279	208376
Q8BU14	Translocation protein SEC62 OS=Mus musculus OX=10090 GN=Sec62 PE=1 SV=1	Sec62	9	3	7	3	45.6
Q9CYN2	Signal peptidase complex subunit 2 OS=Mus musculus OX=10090 GN=Spcs2 PE=1 SV=1	Spcs2	25	5	52	5	25	2.83783e+06	1.01439e+06	701113	1.8832e+06	2.8743e+06	920162	1.01329e+06	960594	2.59592e+06	943616	842264	1.02523e+06	662361	1.17495e+06	1.86225e+06	1.44515e+06	1.39412e+06	1.29333e+06
Q61292	Laminin subunit beta-2 OS=Mus musculus OX=10090 GN=Lamb2 PE=1 SV=2	Lamb2	28	35	398	35	196.5	3.14589e+07	3.18716e+07	1.99451e+07	3.03146e+07	4.02269e+07	2.8717e+07	2.42083e+07	2.74781e+07	4.20301e+07	2.78605e+07	1.89441e+07	2.5111e+07	2.55682e+07	2.33144e+07	2.3303e+07	3.43496e+07	4.07581e+07	2.87278e+07
Q9D8B4	NADH dehydrogenase [ubiquinone] 1 alpha subcomplex subunit 11 OS=Mus musculus OX=10090 GN=Ndufa11 PE=1 SV=2	Ndufa11	54	6	67	6	15	3.19828e+07	2.8318e+07	1.53575e+07	2.85073e+07	4.41487e+07	2.39778e+07	15753308	2.06303e+07	4.16833e+07	3.28801e+07	1.77792e+07	4.1254e+07	2.15194e+07	2.4592e+07	2.88487e+07	3.18099e+07	2.82579e+07	2.6173e+07
P63330	Serine/threonine-protein phosphatase 2A catalytic subunit alpha isoform OS=Mus musculus OX=10090 GN=Ppp2ca PE=1 SV=1	Ppp2ca	52	12	160	12	35.6	3.13687e+07	2.52981e+07	3.35419e+07	3.59824e+07	4.70916e+07	2.31061e+07	2.30778e+07	2.33268e+07	2.9898e+07	2.78901e+07	2.46388e+07	2.57323e+07	2.63036e+07	2.51266e+07	2.87255e+07	3.06337e+07	3.01069e+07	2.8856e+07
Q6ZWV7	60S ribosomal protein L35 OS=Mus musculus OX=10090 GN=Rpl35 PE=1 SV=1	Rpl35	20	3	14	3	14.5	1.91273e+06	1.63667e+06	2.27073e+06	1.75245e+06	1.73516e+06	1.52448e+06	1.45789e+06	1.6124e+06	1.8229e+06	2.27359e+06	1.43625e+06	1.03592e+06	2.00293e+06	1.66699e+06	3.48256e+06	3.93029e+06	1.64315e+06	2.98036e+06
P62889	60S ribosomal protein L30 OS=Mus musculus OX=10090 GN=Rpl30 PE=1 SV=2	Rpl30	59	6	62	6	12.8	8.38946e+06	8.052e+06	8.444e+06	2.54927e+07	1.17732e+07	1.14638e+07	1.3441e+07	1.72841e+07	1.576e+07	9.19529e+06	8.44753e+06	6.90109e+06	5.05564e+06	1.56534e+07	1.30867e+07	5.29189e+06	1.49647e+07	1.87498e+07
Q921S7	39S ribosomal protein L37, mitochondrial OS=Mus musculus OX=10090 GN=Mrpl37 PE=1 SV=1	Mrpl37	8	3	22	3	48.3	907448	155432		639582	1.11638e+06	324450	202376	803747	1.00514e+06	1.05545e+06		839776	514391	240353	651658	690668	376640	732624
Q8C6I2	Succinate dehydrogenase assembly factor 2, mitochondrial OS=Mus musculus OX=10090 GN=Sdhaf2 PE=1 SV=1	Sdhaf2	7	1	11	1	19.4		374345	260615	153289	501448	251318		219906	346935	190292	184612	473110	395706	179587		295401	368718	153539
Q8K2B3	Succinate dehydrogenase [ubiquinone] flavoprotein subunit, mitochondrial OS=Mus musculus OX=10090 GN=Sdha PE=1 SV=1	Sdha	48	25	684	25	72.5	2.41949e+08	1.36256e+08	1.12418e+08	1.48287e+08	1.88372e+08	1.38772e+08	1.55319e+08	1.37394e+08	2.14832e+08	1.84111e+08	1.25206e+08	2.23079e+08	1.85944e+08	1.54893e+08	1.48622e+08	1.71799e+08	1.80809e+08	1.27286e+08
Q9ER60	Sodium channel protein type 4 subunit alpha OS=Mus musculus OX=10090 GN=Scn4a PE=1 SV=1	Scn4a	9	14	109	14	208.7	6.64921e+06	4.33673e+06	5.10885e+06	4.39006e+06	4.01613e+06	5.37942e+06	3.07366e+06	4.28476e+06	5.68876e+06	4.94449e+06	5.24807e+06	3.7527e+06	4.29793e+06	5.39683e+06	5.08373e+06	5.77869e+06	6.33522e+06	6.0797e+06
O55125	Protein NipSnap homolog 1 OS=Mus musculus OX=10090 GN=Nipsnap1 PE=1 SV=1	Nipsnap1	5	1	1	1	33.3
O88322	Nidogen-2 OS=Mus musculus OX=10090 GN=Nid2 PE=1 SV=2	Nid2	18	16	154	16	153.8	2.20346e+07	1.84238e+07	2.10538e+07	2.24303e+07	2.86595e+07	1.62989e+07	2.13617e+07	2.3337e+07	2.4654e+07	2.08046e+07	2.07306e+07	2.23768e+07	2.23275e+07	2.53119e+07	3.19857e+07	2.33081e+07	2.76575e+07	2.60968e+07
Q4PJX1	Protein odr-4 homolog OS=Mus musculus OX=10090 GN=Odr4 PE=1 SV=2	Odr4	9	3	5	3	50	255049	319338		263352	679242	873460	841994	65819.7	412775			1.00398e+06	936359	343446	317261	465354	261145	386106
P62071	Ras-related protein R-Ras2 OS=Mus musculus OX=10090 GN=Rras2 PE=1 SV=1	Rras2	27	5	57	3	23.4	1.47475e+06	2.46516e+06	1.85518e+06	1.34312e+06	1.93612e+06	2.52952e+06	2.02055e+06	1.89725e+06	1.38496e+06	1.16165e+06	1.99251e+06	1.17504e+06	1.38715e+06	2.55011e+06	492149	967681	2.13624e+06	2.29019e+06
Q80X95	Ras-related GTP-binding protein A OS=Mus musculus OX=10090 GN=Rraga PE=1 SV=1	Rraga	10	2	13	2	36.5		166702	111685	120659	130552	7.54638e+06	61267.3	75239.9	66435.6	138173	115476	73176.3	118011	85684.1	55035.4		74950.7
Q5SUC9	Protein SCO1 homolog, mitochondrial OS=Mus musculus OX=10090 GN=Sco1 PE=1 SV=1	Sco1	3	1	16	1	31.6	556051	308058	203906	333823	285505	271039	313208	385907	703402	414835	319115	927559	339787	403847	417237	473929	381281	271073
P42208	Septin-2 OS=Mus musculus OX=10090 GN=Septin2 PE=1 SV=2	Septin2	27	7	91	7	41.5	1.00852e+07	9.24424e+06	6.61036e+06	1.02308e+07	1.24278e+07	3.98161e+06	6.91571e+06	3.89614e+06	6.27281e+06	4.97802e+06	4.59624e+06	4.44818e+06	4.07804e+06	5.20657e+06	6.79745e+06	6.84479e+06	5.43208e+06	6.05135e+06
P15327	Bisphosphoglycerate mutase OS=Mus musculus OX=10090 GN=Bpgm PE=1 SV=2	Bpgm	34	7	90	7	30	8.5904e+06	1.64429e+07	2.29432e+07	1.63024e+07	1.73357e+07	1.6452e+07	1.95763e+07	1.64044e+07	1.21299e+07	1.7392e+07	1.65719e+07	1.60301e+07	1.59624e+07	1.4255e+07	1.36736e+07	1.03277e+07	1.36009e+07	1.78713e+07
O35593	26S proteasome non-ATPase regulatory subunit 14 OS=Mus musculus OX=10090 GN=Psmd14 PE=1 SV=2	Psmd14	17	4	46	4	34.6	9.50874e+06	6.65841e+06	1.39011e+07	1.09441e+07	1.19613e+07	1.03268e+07	9.57157e+06	1.01406e+07	1.07353e+07	9.62955e+06	8.75825e+06	9.94546e+06	8.46821e+06	1.23373e+07	1.09121e+07	1.23378e+07	1.24037e+07	1.11254e+07
Q99PL5	Ribosome-binding protein 1 OS=Mus musculus OX=10090 GN=Rrbp1 PE=1 SV=2	Rrbp1	12	17	151	17	172.8	1.04846e+07	1.10973e+07	6.22847e+06	9.61969e+06	1.13112e+07	7.09803e+06	1.46505e+07	1.2117e+07	1.69951e+07	1.39277e+07	1.09906e+07	1.36771e+07	1.20628e+07	1.40274e+07	2.58633e+07	1.10315e+07	9.84703e+06	1.40527e+07
Q80X85	28S ribosomal protein S7, mitochondrial OS=Mus musculus OX=10090 GN=Mrps7 PE=1 SV=1	Mrps7	5	1	1	1	28				592950		498876	750555
Q9JHW4	Selenocysteine-specific elongation factor OS=Mus musculus OX=10090 GN=Eefsec PE=1 SV=2	Eefsec	2	1	13	1	63.5	178238	154695	214843	308808	365391	168942	217518	256908	282476	314581	250803	260235	200281	297430	348091	164849	202119	262596
P70122	Ribosome maturation protein SBDS OS=Mus musculus OX=10090 GN=Sbds PE=1 SV=4	Sbds	17	4	8	4	28.8	1.65262e+06	2.68184e+06	1.45662e+06	2.15268e+06	2.02586e+06	2.30308e+06	2.45219e+06	2.35996e+06	2.51902e+06	1.94465e+06	2.46333e+06	2.30916e+06	1.71729e+06	1.71623e+06	3.03237e+06	2.55282e+06	2.28426e+06	2.41393e+06
Q99LS3	Phosphoserine phosphatase OS=Mus musculus OX=10090 GN=Psph PE=1 SV=1	Psph	7	2	6	2	25.1	828781	770791	706768	232187	736882	300040	206326	301628	1.22881e+06	710918	371933	308176	481393	1.54784e+07	762743	468854	745839	822649
P82348	Gamma-sarcoglycan OS=Mus musculus OX=10090 GN=Sgcg PE=1 SV=2	Sgcg	30	6	108	6	32.1	1.06735e+07	1.22397e+07	1.243e+07	1.45551e+07	1.63159e+07	1.43728e+07	1.37243e+07	1.30622e+07	1.46443e+07	1.35389e+07	1.13007e+07	1.11185e+07	1.09391e+07	1.01243e+07	1.12161e+07	9.57476e+06	1.02914e+07	1.22412e+07
P17563	Methanethiol oxidase OS=Mus musculus OX=10090 GN=Selenbp1 PE=1 SV=2	Selenbp1	54	19	226	19	52.5	3.02573e+07	3.08474e+07	2.2977e+07	3.05914e+07	4.85821e+07	1.66362e+07	4.3471e+07	2.51381e+07	4.56584e+07	3.43448e+07	1.68564e+07	3.15747e+07	3.08373e+07	1.95249e+07	4.6575e+07	3.11133e+07	2.62505e+07	2.70539e+07
Q8BTY8	Sec1 family domain-containing protein 2 OS=Mus musculus OX=10090 GN=Scfd2 PE=1 SV=1	Scfd2	6	3	21	3	74.7	4.17029e+06	2.60229e+06	3.6913e+06	5.82814e+06	6.52855e+06	3.48367e+06	4.13822e+06	3.72549e+06	4.68709e+06	3.74227e+06	3.25895e+06	4.03028e+06	3.59875e+06	4.59688e+06	6.64212e+06	2.67925e+06	3.85958e+06	3.35355e+06
Q91XB7	Protein YIF1A OS=Mus musculus OX=10090 GN=Yif1a PE=1 SV=1	Yif1a	10	2	13	2	32.1	899221	938965	1.25185e+06		988224	917315	1158831	822352	1.25739e+06	912954	620314	1.04103e+06			919740	312377
Q9CQW1	Synaptobrevin homolog YKT6 OS=Mus musculus OX=10090 GN=Ykt6 PE=1 SV=1	Ykt6	33	7	84	7	22.3	4.70069e+06	7.82884e+06	5.25854e+06	6.27419e+06	7.27971e+06	3.69539e+06	5.13777e+06	5.5553e+06	7.81917e+06	7.6499e+06	4.9208e+06	4.94735e+06	6.00687e+06	4.86082e+06	5.47226e+06	2.98473e+06	5.55501e+06	7.61228e+06
O88939	Zinc finger and BTB domain-containing protein 7A OS=Mus musculus OX=10090 GN=Zbtb7a PE=1 SV=2	Zbtb7a	3	1	1	1	60.2	87678.7	64491.1		82400	85777.8	30522.9		52978.1		68823	55670.8	36824.9	35047.4	47161.1	48923.4	63766.9	72575.2	106682
P62838	Ubiquitin-conjugating enzyme E2 D2 OS=Mus musculus OX=10090 GN=Ube2d2 PE=1 SV=1	Ube2d2	41	4	39	1	16.7	571847	527854	556240	649162	4.78154e+06	5.43271e+06						621391		624709	451316	590870	638049	740601
Q60930	Voltage-dependent anion-selective channel protein 2 OS=Mus musculus OX=10090 GN=Vdac2 PE=1 SV=2	Vdac2	54	12	255	12	31.7	1.81306e+08	1.52074e+08	1.11683e+08	1.37649e+08	1.51632e+08	1.35554e+08	125345483	1.31992e+08	2.04426e+08	1.42975e+08	1.16229e+08	1.92323e+08	1.39005e+08	1.19275e+08	1.20614e+08	1.34114e+08	1.592e+08	1.40544e+08
Q3U381	Zinc finger protein 692 OS=Mus musculus OX=10090 GN=Znf692 PE=2 SV=1	Znf692	2	1	17	1	59	1.03864e+06	974312	956926	1.06099e+06	661924	751831	1.29974e+06	1.10516e+06	732427	1.41678e+06	1.35214e+06	2.05344e+06	1.05074e+06	911360	1.0519e+06	755455	1.16745e+06	1.42167e+06
P22599	Alpha-1-antitrypsin 1-2 OS=Mus musculus OX=10090 GN=Serpina1b PE=1 SV=2	Serpina1b	50	15	321	5	45.9	4.19217e+07	5.12775e+07	1.10435e+08	5.15844e+07	8.26681e+07	3.14094e+07	5.33737e+07	5.75864e+07	7.59906e+07	5.72216e+07	6.57619e+07	4.33067e+07	3.71116e+07	3.56586e+07	1.42611e+08	7.43548e+07	6.99747e+07	6.06557e+07
O35643	AP-1 complex subunit beta-1 OS=Mus musculus OX=10090 GN=Ap1b1 PE=1 SV=2	Ap1b1	20	16	144	9	103.9	2.32289e+06	2.78418e+06	1.67765e+06	3.23668e+06	3.74278e+06	1.61703e+06	2.52902e+06	3.13487e+06	6.37768e+06	5.4524e+06	2.68083e+06	3.66706e+06	2.48087e+06	2.40913e+06	5.3314e+06	3.77138e+06	3.47377e+06	4.43075e+06
Q570Y9	DEP domain-containing mTOR-interacting protein OS=Mus musculus OX=10090 GN=Deptor PE=1 SV=2	Deptor	6	2	4	2	46.1	128794	735219	767617	713317	428101		701483		349679			397044	460144				443540	547556
O08579	Emerin OS=Mus musculus OX=10090 GN=Emd PE=1 SV=1	Emd	14	3	33	3	29.4	771190	1.14532e+06	707873	840809	1.28146e+06	956663	972564	980257	1.67224e+06	1.46054e+06	1.04381e+06	1.75014e+06	1.34597e+06	1.48101e+06	2.02306e+06	1.06489e+06	1.31566e+06	1.40668e+06
Q61545	RNA-binding protein EWS OS=Mus musculus OX=10090 GN=Ewsr1 PE=1 SV=2	Ewsr1	1	1	1	1	68.4	453008	409486	324918	450009	414821	289290	212819		304136	331178	365775	328142	313828	307005	871561	582582	402631	313224
O08795	Glucosidase 2 subunit beta OS=Mus musculus OX=10090 GN=Prkcsh PE=1 SV=1	Prkcsh	16	7	55	7	58.8	7.20412e+06	5.7869e+06	4.25287e+06	5.24278e+06	5.8809e+06	4.23876e+06	5.85824e+06	7.52683e+06	6.63165e+06	4.70805e+06	5.25162e+06	6.87356e+06	3.66189e+06	9.94887e+06	8.79194e+06	8.4545e+06	9.35186e+06	6.33489e+06
Q9CPS6	Histidine triad nucleotide-binding protein 3 OS=Mus musculus OX=10090 GN=Hint3 PE=1 SV=1	Hint3	24	3	32	3	18.8	2.97975e+06	2.40295e+06	1.93676e+06	1.6923e+06	3.33529e+06	1.6455e+06	3.05807e+06	1.65833e+06	2.83356e+06	2.15338e+06	1.34069e+06	3.13967e+06	1.08451e+06	835026	1.63283e+06	2.53485e+06	2.8725e+06	2.45135e+06
P01867	Ig gamma-2B chain C region OS=Mus musculus OX=10090 GN=Igh-3 PE=1 SV=3	Igh-3	2	1	17	1	44.2	1.31061e+06	1.6699e+06	1.79563e+06	1.22437e+06	2.88921e+06	2.55001e+06	2.46432e+06	2.97342e+06	5.70559e+06	2.42387e+06	2.04335e+06	2.90287e+06	2.50531e+06	1.51972e+06	5.5159e+06	1.92005e+06	2.11578e+06	2.96669e+06
P59325	Eukaryotic translation initiation factor 5 OS=Mus musculus OX=10090 GN=Eif5 PE=1 SV=1	Eif5	14	5	58	5	48.9	4.84873e+06	5.36709e+06	4.5801e+06	4.95128e+06	6.52899e+06	4.72812e+06	5.46818e+06	5.44792e+06	6.00045e+06	5.57747e+06	5.34983e+06	5.26383e+06	4.42073e+06	4.25988e+06	4.90975e+06	4.27829e+06	4.60993e+06	4.68915e+06
P01882	Ig delta chain C region membrane-bound form OS=Mus musculus OX=10090 PE=1 SV=3	--	4	1	1	1	32.3		55831.7	80065.5			163260		143822			181897				382623			144724
Q9JI39	ATP-binding cassette sub-family B member 10, mitochondrial OS=Mus musculus OX=10090 GN=Abcb10 PE=1 SV=1	Abcb10	3	1	2	1	77.1
Q62148	Retinal dehydrogenase 2 OS=Mus musculus OX=10090 GN=Aldh1a2 PE=1 SV=2	Aldh1a2	5	3	53	1	56.6	416471	415865	366653	537522	422629	305249	295747	285654		403276	225386	419291	346548	451736	324589	213008	411806	312423
P41216	Long-chain-fatty-acid--CoA ligase 1 OS=Mus musculus OX=10090 GN=Acsl1 PE=1 SV=2	Acsl1	51	31	702	30	77.9	2.534e+08	1.65809e+08	1.2698e+08	1.85496e+08	2.97016e+08	1.41859e+08	1.8207e+08	1.59274e+08	3.09816e+08	2.14119e+08	1.30126e+08	2.28654e+08	1.90174e+08	1.20287e+08	1.74021e+08	1.65682e+08	2.14292e+08	1.65664e+08
O70578	Voltage-dependent calcium channel gamma-1 subunit OS=Mus musculus OX=10090 GN=Cacng1 PE=1 SV=1	Cacng1	6	2	8	2	25.1	292377	478331	484763	573747	359660	495211	347707	402377	224241	226504	177550	173013	87465.3	175527	103108	101427	615903	726064
P53996	Cellular nucleic acid-binding protein OS=Mus musculus OX=10090 GN=Cnbp PE=1 SV=2	Cnbp	45	7	102	7	19.6	1.09523e+07	1.14508e+07	1.11488e+07	1.3312e+07	1.28568e+07	1.01424e+07	1.04807e+07	1.17632e+07	1.2612e+07	1.23958e+07	1.14784e+07	1.05585e+07	8.98662e+06	1.04646e+07	1.19883e+07	1.13545e+07	1.06304e+07	1.1614e+07
P97314	Cysteine and glycine-rich protein 2 OS=Mus musculus OX=10090 GN=Csrp2 PE=1 SV=3	Csrp2	7	1	4	1	20.9
Q9CWS0	N(G),N(G)-dimethylarginine dimethylaminohydrolase 1 OS=Mus musculus OX=10090 GN=Ddah1 PE=1 SV=3	Ddah1	16	4	21	3	31.4	1.22507e+06	805201	641385	657073	774442			1.07205e+06		842694	674394		822959	383234			1.11106e+06
Q80UP3	Diacylglycerol kinase zeta OS=Mus musculus OX=10090 GN=Dgkz PE=1 SV=2	Dgkz	4	2	19	2	104	153244	161581		185356	145995	172409	123665	116202	125952	130671	172322	119778	156055	166305	161156	124051	109209	159486
Q8BHA3	D-aminoacyl-tRNA deacylase 2 OS=Mus musculus OX=10090 GN=Dtd2 PE=1 SV=1	Dtd2	13	1	5	1	18.2	157993							104172	183296				117002	120095	165880		124411	134908
P51807	Dynein light chain Tctex-type 1 OS=Mus musculus OX=10090 GN=Dynlt1 PE=1 SV=1	Dynlt1	16	1	7	1	12.5
Q3UGP8	Putative Dol-P-Glc:Glc(2)Man(9)GlcNAc(2)-PP-Dol alpha-1,2-glucosyltransferase OS=Mus musculus OX=10090 GN=Alg10b PE=1 SV=1	Alg10b	3	1	16	1	55.4	303756	289611	189779		300747	159188	200214	172447		245073	155630	230426	206618	166366	239782	240767	243825	286594
Q7TQH0	Ataxin-2-like protein OS=Mus musculus OX=10090 GN=Atxn2l PE=1 SV=1	Atxn2l	5	4	30	4	110.6	1.46656e+08	2.2565e+08	2.53237e+08	2.29462e+08	1.70368e+08	2.35314e+08	182472144	1.76506e+08	1.05256e+08	1.5216e+08	2.08417e+08	1.54668e+08	1.34226e+08	1.74381e+08	1.66333e+08	1.17602e+08	1.54972e+08	1.6587e+08
Q5NBX1	Protein cordon-bleu OS=Mus musculus OX=10090 GN=Cobl PE=1 SV=1	Cobl	11	11	130	11	143.8	2.25213e+07	1.3918e+07	1.21944e+07	1.00562e+07	1.02976e+07	1.52695e+07	1.70878e+07	1.26821e+07	2.10493e+07	1.63314e+07	1.33814e+07	2.2104e+07	1.96241e+07	1.75555e+07	1.62963e+07	1.81399e+07	1.93273e+07	1.75551e+07
P45591	Cofilin-2 OS=Mus musculus OX=10090 GN=Cfl2 PE=1 SV=1	Cfl2	63	11	253	9	18.7	6.33101e+07	7.95722e+07	8.06038e+07	7.43738e+07	7.95659e+07	1.02241e+08	9.35337e+07	9.43779e+07	1.1771e+08	1.15461e+08	1.01117e+08	9.52942e+07	1.2147e+08	1.2903e+08	1.25118e+08	1.09861e+08	9.7888e+07	7.77114e+07
O88712	C-terminal-binding protein 1 OS=Mus musculus OX=10090 GN=Ctbp1 PE=1 SV=2	Ctbp1	21	7	82	7	47.7	5.60852e+06	4.68937e+06	5.01171e+06	8.8312e+06	5.68913e+06	5.20838e+06	3.84898e+06	3.85179e+06	6.89623e+06	5.924e+06	4.37353e+06	6.72059e+06	6.34279e+06	4.87739e+06	5.35282e+06	3.56479e+06	5.16148e+06	3.56687e+06
P21460	Cystatin-C OS=Mus musculus OX=10090 GN=Cst3 PE=1 SV=2	Cst3	32	3	41	3	15.5	2.85728e+06	1.73306e+06	1.95061e+06	1.47946e+06	1.56164e+06	2.26811e+06	2.18556e+06	2.92046e+06	3.06324e+06	3.0185e+06	2.84227e+06	2.69038e+06	3.2039e+06	3.83086e+06	4.17287e+06	4.3105e+06	3.71449e+06	2.90614e+06
O35459	Delta(3,5)-Delta(2,4)-dienoyl-CoA isomerase, mitochondrial OS=Mus musculus OX=10090 GN=Ech1 PE=1 SV=1	Ech1	37	10	166	10	36.1	2.66956e+07	2.68788e+07	1.99172e+07	3.05596e+07	4.51338e+07	2.15585e+07	2.65392e+07	2.35389e+07	3.73205e+07	3.37741e+07	1.85148e+07	2.82268e+07	2.70168e+07	1.9787e+07	2.61854e+07	2.78846e+07	3.24161e+07	2.30621e+07
Q9WUR2	Enoyl-CoA delta isomerase 2 OS=Mus musculus OX=10090 GN=Eci2 PE=1 SV=2	Eci2	21	6	70	6	43.2	1.18889e+07	1.29677e+07	1.06521e+07	1.12495e+07	1.8015e+07	1.06243e+07	1.15546e+07	8.3871e+06	1.30628e+07	9.4552e+06	8.21015e+06	1.12736e+07	9.13359e+06	8.10957e+06	7.85981e+06	8.76196e+06	1.02857e+07	9.74675e+06
Q00897	Alpha-1-antitrypsin 1-4 OS=Mus musculus OX=10090 GN=Serpina1d PE=1 SV=1	Serpina1d	48	15	358	5	46	1.76109e+08	1.52999e+08	2.62271e+08	1.44904e+08	2.13646e+08	1.416e+08	2.11777e+08	2.22032e+08	3.07765e+08	2.14911e+08	2.56119e+08	2.20104e+08	1.77094e+08	1.30903e+08	4.7779e+08	1.9361e+08	1.92485e+08	1.74342e+08
P63101	14-3-3 protein zeta/delta OS=Mus musculus OX=10090 GN=Ywhaz PE=1 SV=1	Ywhaz	63	16	388	10	27.8	6.1191e+07	5.76734e+07	4.59763e+07	6.47419e+07	8.58657e+07	4.86011e+07	5.40211e+07	5.88509e+07	7.79564e+07	6.47252e+07	4.80335e+07	6.73562e+07	5.53055e+07	6.03321e+07	9.10868e+07	5.41457e+07	5.39425e+07	6.57399e+07
O08915	AH receptor-interacting protein OS=Mus musculus OX=10090 GN=Aip PE=1 SV=1	Aip	15	3	18	3	37.6	1.14943e+06	1.28533e+06	961991	1.15785e+06	1.91891e+06	1.02124e+06	1.18921e+06	826458	718160	923026	802120	875597	806431	811259	1.07136e+06	843202	966836	620141
Q8BFR5	Elongation factor Tu, mitochondrial OS=Mus musculus OX=10090 GN=Tufm PE=1 SV=1	Tufm	60	23	383	23	49.5	1.86766e+08	1.18127e+08	9.12544e+07	1.17166e+08	1.87732e+08	1.40089e+08	1.48274e+08	1.31634e+08	1.87585e+08	1.5066e+08	1.0589e+08	1.71966e+08	1.29166e+08	1.13996e+08	1.27496e+08	1.15114e+08	1.51877e+08	1.12862e+08
P70266	6-phosphofructo-2-kinase/fructose-2,6-bisphosphatase 1 OS=Mus musculus OX=10090 GN=Pfkfb1 PE=1 SV=2	Pfkfb1	31	11	102	11	54.8	6.35298e+06	7.32927e+06	4.7333e+06	6.04513e+06	1.26785e+07	8.09764e+06	3.0568e+06	5.094e+06	5.13556e+06	6.00644e+06	4.58688e+06	7.80293e+06	6.07384e+06	4.83087e+06	3.31631e+06	6.21686e+06	6.08309e+06	4.93391e+06
P62880	Guanine nucleotide-binding protein G(I)/G(S)/G(T) subunit beta-2 OS=Mus musculus OX=10090 GN=Gnb2 PE=1 SV=3	Gnb2	24	7	111	4	37.3	5.40418e+06	4.87997e+06	4.44523e+06	4.70674e+06	5.66209e+06	4.2461e+06	4.63173e+06	4.52934e+06	7.11124e+06	5.48629e+06	4.79118e+06	6.65249e+06	6.15712e+06	6.52093e+06	8.82699e+06	3.08181e+06	5.57486e+06	5.33225e+06
P63073	Eukaryotic translation initiation factor 4E OS=Mus musculus OX=10090 GN=Eif4e PE=1 SV=1	Eif4e	25	5	66	5	25	4.17621e+06	5.10159e+06	4.425e+06	5.33804e+06	4.6014e+06	4.40596e+06	5.39944e+06	5.20662e+06	5.41462e+06	5.46815e+06	5.69525e+06	5.87633e+06	6.03269e+06	4.22536e+06	5.33661e+06	4.90933e+06	4.66237e+06	4.86092e+06
P03987	Ig gamma-3 chain C region OS=Mus musculus OX=10090 PE=1 SV=2	--	11	2	16	2	43.9	596838			1.07882e+06	1.07887e+06	449120	254028	594409	2.52849e+06	615132	501556	616071	750293	641736	825277	680645	929560
Q9DBD0	Inhibitor of carbonic anhydrase OS=Mus musculus OX=10090 GN=Ica PE=1 SV=1	Ica	19	8	63	7	76.7	392181	496635	941102	550843	1.27155e+06	476803	566753	477876	768815	529903	746706	488948	394745	300531	653364	743531	655924	502042
P60843	Eukaryotic initiation factor 4A-I OS=Mus musculus OX=10090 GN=Eif4a1 PE=1 SV=1	Eif4a1	50	18	277	7	46.1	9.26591e+06	1.02547e+07	1.11099e+07	1.01885e+07	6.71219e+06	7.88787e+06	9.3836e+06	1.03233e+07	8.82997e+06	8.61504e+06	1.02034e+07	7.63686e+06	8.58141e+06	7.5441e+06	9.4273e+06	7.85325e+06	9.39995e+06	1.06662e+07
O54931	A-kinase anchor protein 2 OS=Mus musculus OX=10090 GN=Akap2 PE=1 SV=3	Akap2	2	1	4	1	98.5	387101	182849	84286.1	204229	195404	102703	281051	240710	334175	406414	273345	545683	397081	331856	707271	370790	275255	253121
P55302	Alpha-2-macroglobulin receptor-associated protein OS=Mus musculus OX=10090 GN=Lrpap1 PE=1 SV=1	Lrpap1	25	8	61	8	42.2	1.4761e+07	9.52525e+06	8.05546e+06	9.43093e+06	1.18174e+07	7.27771e+06	1.09648e+07	8.81611e+06	1.76748e+07	1.00865e+07	7.14547e+06	1.36959e+07	7.20292e+06	8.586e+06	1.22448e+07	7.93984e+06	9.23665e+06	7.48428e+06
P06728	Apolipoprotein A-IV OS=Mus musculus OX=10090 GN=Apoa4 PE=1 SV=3	Apoa4	52	18	192	18	45	2.10078e+07	1.71178e+07	2.9744e+07	2.0519e+07	3.10331e+07	1.4186e+07	1.72349e+07	1.9929e+07	3.202e+07	1.95124e+07	2.42453e+07	1.98311e+07	1.19465e+07	1.43599e+07	4.6861e+07	1.83199e+07	2.22118e+07	1.76048e+07
Q9DCH4	Eukaryotic translation initiation factor 3 subunit F OS=Mus musculus OX=10090 GN=Eif3f PE=1 SV=2	Eif3f	18	5	57	5	38	5.3671e+06	6.79715e+06	7.12295e+06	7.07518e+06	6.79183e+06	4.38407e+06	5.7956e+06	6.09845e+06	5.76522e+06	6.03547e+06	5.95326e+06	5.4301e+06	5.37057e+06	4.8908e+06	5.05161e+06	4.32633e+06	7.06292e+06	5.66398e+06
Q9Z0E6	Guanylate-binding protein 2 OS=Mus musculus OX=10090 GN=Gbp2 PE=1 SV=1	Gbp2	6	2	7	2	66.7				558871		84693.6	180184		353400	385826					443513	208373	584248
Q99JY3	GTPase IMAP family member 4 OS=Mus musculus OX=10090 GN=Gimap4 PE=1 SV=2	Gimap4	14	4	35	4	38	553775	285149	303671	445647	652301	247861	255788	313877	451465	356656	223034	304034	175734	204945	935916	252476	393556	576216
Q9JL56	Glycerophosphodiester phosphodiesterase 1 OS=Mus musculus OX=10090 GN=Gde1 PE=1 SV=1	Gde1	8	2	3	2	37.6	64943.6	62536.5			79205.6	127804	84991.6	98660.1		96505.6	389126	422202	567495	307208	147668	209147		313141
P51655	Glypican-4 OS=Mus musculus OX=10090 GN=Gpc4 PE=1 SV=2	Gpc4	1	1	3	1	62.5	65053.9	73642.8	54344.3	152750	66694	163588	111740	230876	172928	189370	204977	109727	106151	74556	159439	136120	144793	156525
P02104	Hemoglobin subunit epsilon-Y2 OS=Mus musculus OX=10090 GN=Hbb-y PE=1 SV=2	Hbb-y	18	3	5	2	16.1	399775	311187	1.45062e+06	1.03581e+06	85252	682525	979150	480800	233918			1.22326e+06		177410	470677		438736	328983
Q504N7	Pyrin and HIN domain-containing protein 1-like OS=Mus musculus OX=10090 PE=2 SV=1	--	8	2	2	2	43.8	159977	1.19079e+06	140807	246850	114172	194621	133014	202114	197510	221254	964520	284121	167244	110178	1.55367e+06	159418	202448	237086
P42703	Leukemia inhibitory factor receptor OS=Mus musculus OX=10090 GN=Lifr PE=1 SV=1	Lifr	2	2	9	2	122.5	409399		574280	553995	634994	271542	482307	406584	528417	334576	547276	375724	301036	657771	764504	292792	415446
O09174	Alpha-methylacyl-CoA racemase OS=Mus musculus OX=10090 GN=Amacr PE=1 SV=4	Amacr	4	1	1	1	41.7
Q8QZR5	Alanine aminotransferase 1 OS=Mus musculus OX=10090 GN=Gpt PE=1 SV=3	Gpt	30	12	144	11	55.1	1.28604e+07	9.29727e+06	7.81111e+06	9.74233e+06	1.48982e+07	8.85314e+06	6.9601e+06	9.85099e+06	1.60935e+07	1.07118e+07	7.1392e+06	1.33652e+07	1.02041e+07	9.88837e+06	1.2507e+07	1.05692e+07	8.833e+06	8.49081e+06
Q8CJG0	Protein argonaute-2 OS=Mus musculus OX=10090 GN=Ago2 PE=1 SV=3	Ago2	11	7	67	7	97.2	3.40912e+06	2.0796e+06	2.28451e+06	2.54505e+06	2.57774e+06	3.07802e+06	1.8768e+06	6.96197e+06	1.94734e+06	2.56889e+06	3.31305e+06	3.11179e+06	3.11267e+06	4.94187e+06	1.53282e+06	2.19198e+06	2.22026e+06	2.67498e+06
Q6PDY2	2-aminoethanethiol dioxygenase OS=Mus musculus OX=10090 GN=Ado PE=1 SV=2	Ado	24	3	20	3	28.4	827702	1.42449e+06	948183	609681	577368	462538	861292	589323	878740	480635	743860	586328	705789	227965	2.17033e+06	805613	948764	586478
Q78IK2	ATP synthase membrane subunit DAPIT, mitochondrial OS=Mus musculus OX=10090 GN=Atp5md PE=1 SV=1	Atp5md	19	2	9	2	6.4	6.54873e+07	3.05906e+07	1.59488e+07	2.15184e+07	9.4578e+06	3.1226e+07	2.2349e+07	3.28826e+07	5.36839e+07	4.96709e+07	2.57182e+07	5.70662e+07	5.01803e+07	3.46172e+07	5.32439e+07	5.33891e+07	4.45249e+07	3.16412e+07
Q6NT99	Dual specificity protein phosphatase 23 OS=Mus musculus OX=10090 GN=Dusp23 PE=1 SV=1	Dusp23	59	8	111	8	16.6	8.90717e+06	7.05524e+06	7.10518e+06	7.52033e+06	8.39473e+06	7.54439e+06	9.0207e+06	7.89448e+06	8.58298e+06	9.13705e+06	7.30833e+06	1.21423e+07	1.00697e+07	8.69667e+06	7.51456e+06	7.85532e+06	7.37902e+06	6.63869e+06
P42567	Epidermal growth factor receptor substrate 15 OS=Mus musculus OX=10090 GN=Eps15 PE=1 SV=1	Eps15	3	2	9	2	98.4	524588	652875	137148	148037	1.04578e+06	78923.4	104247	148844	178778	154904	98573.5	96760.9	113892	122513	248819	144638	219658	230486
Q9Z1E4	Glycogen [starch] synthase, muscle OS=Mus musculus OX=10090 GN=Gys1 PE=1 SV=2	Gys1	49	32	698	32	83.9	1.58178e+08	1.27942e+08	1.24293e+08	1.48116e+08	1.81358e+08	1.16486e+08	1.06671e+08	1.25248e+08	1.46733e+08	1.46836e+08	1.12881e+08	1.56838e+08	1.24026e+08	1.24151e+08	1.0764e+08	1.27409e+08	1.47267e+08	1.33629e+08
P14483	H-2 class II histocompatibility antigen, A beta chain OS=Mus musculus OX=10090 GN=H2-Ab1 PE=1 SV=1	H2-Ab1	14	4	6	4	30.1	775824	934464	807272	792757	2.14417e+06	1.32052e+06	1.74316e+06	1.36505e+06	1.21488e+06	1.52703e+06	1.47496e+06	1.35987e+06	1.53738e+06	1.43427e+06	4.22574e+06	1.26825e+06	1.24733e+06	2.45922e+06
P51163	Uroporphyrinogen-III synthase OS=Mus musculus OX=10090 GN=Uros PE=1 SV=1	Uros	9	1	11	1	28.5	1.27366e+06			659106	546867	413570	604614	718915	1.00589e+06	698847	341431	570002	755405	376943			788233	486377
Q9D1N2	Glycosylphosphatidylinositol-anchored high density lipoprotein-binding protein 1 OS=Mus musculus OX=10090 GN=Gpihbp1 PE=1 SV=1	Gpihbp1	6	1	17	1	24.6	1.07323e+06	841684	861482	1.1123e+06	1.43137e+06	666261	803657	699950	1.03051e+06	926277	661050	1.04178e+06	916792	493092	776528	519697	705208
Q9Z2N8	Actin-like protein 6A OS=Mus musculus OX=10090 GN=Actl6a PE=1 SV=2	Actl6a	3	1	4	1	47.4	577909	717969	595337	974860		583399	586422	1.11312e+06	856081	561714	1.00821e+06	745842	777905	532693			768557	835255
Q00898	Alpha-1-antitrypsin 1-5 OS=Mus musculus OX=10090 GN=Serpina1e PE=1 SV=1	Serpina1e	35	12	346	6	45.9	1.2643e+07	9.06335e+06	1.6748e+07	1.6837e+07	2.51501e+07	1.18981e+07	1.90545e+07	2.19191e+07	3.66568e+07	3.06572e+07	4.70866e+07	1.07137e+07	2.66004e+07	1.70889e+07	7.44892e+07	2.9653e+07	3.22702e+07	1.08983e+07
Q9DBF1	Alpha-aminoadipic semialdehyde dehydrogenase OS=Mus musculus OX=10090 GN=Aldh7a1 PE=1 SV=4	Aldh7a1	16	6	61	6	58.8	6.55703e+06	6.60367e+06	5.19476e+06	5.40023e+06	6.37702e+06	3.68395e+06	7.29261e+06	6.64117e+06	7.03097e+06	6.70124e+06	7.03644e+06	6.92802e+06	6.86116e+06	6.19698e+06	7.90916e+06	6.33187e+06	7.05339e+06	8.09823e+06
Q9JJW6	Aly/REF export factor 2 OS=Mus musculus OX=10090 GN=Alyref2 PE=1 SV=1	Alyref2	5	1	9	1	23.7	895919	655370		430558	276763	406109	402241		1.19199e+06	662760	566717	745565	621393	448266	1.68817e+06	442898		544631
Q925I1	ATPase family AAA domain-containing protein 3 OS=Mus musculus OX=10090 GN=Atad3 PE=1 SV=1	Atad3	24	12	133	12	66.7	1.16834e+07	8.15428e+06	7.5036e+06	8.51656e+06	1.57537e+07	1.24573e+07	7.97691e+06	7.72554e+06	1.05579e+07	8.27805e+06	6.70574e+06	1.08886e+07	8.63316e+06	7.77655e+06	7.04754e+06	6.75081e+06	8.20981e+06	8.25648e+06
Q8VCU1	Carboxylesterase 3B OS=Mus musculus OX=10090 GN=Ces3b PE=1 SV=2	Ces3b	11	3	3	2	63.3
P13707	Glycerol-3-phosphate dehydrogenase [NAD(+)], cytoplasmic OS=Mus musculus OX=10090 GN=Gpd1 PE=1 SV=3	Gpd1	80	26	749	25	37.5	5.25249e+08	5.02282e+08	5.51429e+08	4.53694e+08	4.70812e+08	5.75124e+08	5.39054e+08	5.60429e+08	4.94926e+08	5.43488e+08	6.24536e+08	6.66445e+08	5.77327e+08	6.58681e+08	6.38519e+08	5.88679e+08	5.76153e+08	5.84371e+08
P97494	Glutamate--cysteine ligase catalytic subunit OS=Mus musculus OX=10090 GN=Gclc PE=1 SV=4	Gclc	2	1	1	1	72.5
Q64523	Histone H2A type 2-C OS=Mus musculus OX=10090 GN=H2ac20 PE=1 SV=3	H2ac20	36	5	233	2	14	1.16631e+08	9.53896e+07	8.65614e+07	1.08101e+08	1.11718e+08	7.99338e+07	1.07588e+08	9.45205e+07	5.64875e+07	6.85459e+07	8.8523e+07	1.61333e+08	1.00398e+08	1.2691e+08	2.07183e+08	1.25348e+08	1.05786e+08	1.46977e+08
Q64475	Histone H2B type 1-B OS=Mus musculus OX=10090 GN=H2bc3 PE=1 SV=3	H2bc3	36	5	154	2	13.9	1.08043e+08	1.08022e+08	7.83509e+07	1.2397e+08	1.27912e+08	7.92495e+07	9.5827e+07	8.78049e+07	7.96386e+07	1.02412e+08	7.76896e+07	9.94942e+07	9.17128e+07	9.56164e+07	1.66697e+08	7.88824e+07	8.17243e+07	1.00179e+08
P62748	Hippocalcin-like protein 1 OS=Mus musculus OX=10090 GN=Hpcal1 PE=1 SV=2	Hpcal1	15	3	15	3	22.3		927402	125499		668166		311359	126071	1.25152e+06	314494	393533			427836	1.53831e+06		669930	676424
Q8BUK6	Protein Hook homolog 3 OS=Mus musculus OX=10090 GN=Hook3 PE=1 SV=2	Hook3	19	10	57	10	83.2	1.44399e+07	4.99058e+06	3.52503e+06	4.39318e+06	4.63116e+06	4.71495e+06	3.89461e+06	4.06195e+06	1.50145e+07	4.94801e+06	3.89164e+06	1.18731e+07	8.49959e+06	5.04908e+06	6.59544e+06	6.56609e+06	6.38552e+06	3.80227e+06
Q3U5Q7	UMP-CMP kinase 2, mitochondrial OS=Mus musculus OX=10090 GN=Cmpk2 PE=1 SV=2	Cmpk2	4	1	2	1	50
Q9CZU6	Citrate synthase, mitochondrial OS=Mus musculus OX=10090 GN=Cs PE=1 SV=1	Cs	42	14	621	14	51.7	5.48379e+08	4.00011e+08	3.29779e+08	5.12318e+08	7.05355e+08	3.64493e+08	3.73782e+08	3.78672e+08	5.44152e+08	4.84802e+08	2.97311e+08	5.42543e+08	4.14374e+08	3.49058e+08	3.36416e+08	3.82759e+08	4.57587e+08	3.87463e+08
Q9Z1Q5	Chloride intracellular channel protein 1 OS=Mus musculus OX=10090 GN=Clic1 PE=1 SV=3	Clic1	15	4	18	4	27	1.64077e+06	898197		1.79295e+06	2.56886e+06	623260	1.10662e+06	1.27897e+06	2.25522e+06	805564	838627	989645	616741	876627	4.24556e+06	912005	823222	2.11286e+06
P56395	Cytochrome b5 OS=Mus musculus OX=10090 GN=Cyb5a PE=1 SV=2	Cyb5a	41	4	64	4	15.2	7.07613e+06	3.51015e+06	2.44505e+06	2.70495e+06	3.33119e+06	4.89164e+06	9.11678e+06	9.33264e+06	1.33712e+07	8.28285e+06	7.41516e+06	9.20036e+06	8.32581e+06	6.76918e+06	3.44928e+07	9.90815e+06	7.65014e+06	9.62184e+06
Q8CBY8	Dynactin subunit 4 OS=Mus musculus OX=10090 GN=Dctn4 PE=1 SV=1	Dctn4	5	2	34	2	53	2.65022e+06	1.80385e+06	2.07629e+06	2.06778e+06	2.06562e+06	2.29023e+06	2.45441e+06	2.44736e+06	2.21673e+06	2.37932e+06	2.54972e+06	2.26047e+06	1.51086e+06	1.75414e+06	1.89677e+06	2.42325e+06	1.81781e+06	2.38166e+06
P50171	Estradiol 17-beta-dehydrogenase 8 OS=Mus musculus OX=10090 GN=Hsd17b8 PE=1 SV=2	Hsd17b8	47	7	78	7	26.6	4.49318e+06	2.07805e+06	710156	4.21069e+06	3.12616e+06	3.40502e+06	2.17521e+06	1.47308e+06	3.24237e+06	2.51303e+06	1.29583e+06	2.92648e+06	1.86654e+06	1.54793e+06	1.87615e+06	3.38762e+06	2.44398e+06	1.08224e+06
Q9D7J9	Enoyl-CoA hydratase domain-containing protein 3, mitochondrial OS=Mus musculus OX=10090 GN=Echdc3 PE=1 SV=1	Echdc3	13	3	20	3	32.4	599718	247901	374641	255342	606220	530770	571180	543492	378278	580978	228400	374005	225934	343939	850260	597924	450187	312814
Q9Z188	Dual specificity tyrosine-phosphorylation-regulated kinase 1B OS=Mus musculus OX=10090 GN=Dyrk1b PE=1 SV=3	Dyrk1b	2	1	10	1	69.1	681191	290836	290003	277078	445660	154279	117273	322589	477111	369782	392173	508242	380022	400851	359408	414222	459949	358638
P98192	Dihydroxyacetone phosphate acyltransferase OS=Mus musculus OX=10090 GN=Gnpat PE=1 SV=1	Gnpat	5	3	8	3	76.8	628292	585526	84439.1	97290.3	1.05924e+06	211943	1.04619e+06	124736	481428	255390	67045.7	265092	312115	270893	340595	84934.4	578780
P21278	Guanine nucleotide-binding protein subunit alpha-11 OS=Mus musculus OX=10090 GN=Gna11 PE=1 SV=1	Gna11	11	3	27	2	42	2.22359e+06	2.63662e+06	1.87773e+06	2.71508e+06	3.60001e+06	1.98601e+06	2.81605e+06	1.96019e+06	2.98791e+06	3.61381e+06	2.47562e+06	2.0484e+06	5.34298e+06	1.94162e+06	4.15089e+06	1.89179e+06	2.06305e+06	2.23534e+06
Q9QZ57	Heat shock protein beta-3 OS=Mus musculus OX=10090 GN=Hspb3 PE=2 SV=1	Hspb3	37	4	57	4	17.2	4.89776e+06	6.4207e+06	8.51919e+06	1.05245e+07	1.39986e+07	1.39524e+07	2.00591e+07	1.33077e+07	1.17694e+07	1.35932e+07	1.19644e+07	1.35698e+07	1.25807e+07	1.23109e+07	1.11478e+07	1.23113e+07	1.03787e+07	1.23006e+07
Q9WTP6	Adenylate kinase 2, mitochondrial OS=Mus musculus OX=10090 GN=Ak2 PE=1 SV=5	Ak2	24	5	82	5	26.5	9.95987e+06	7.36972e+06	5.56677e+06	6.4377e+06	8.17348e+06	6.72279e+06	8.48375e+06	7.82301e+06	1.76892e+07	9.04518e+06	5.39944e+06	9.12364e+06	6.70042e+06	6.72563e+06	1.74418e+07	7.67807e+06	8.14368e+06	7.39557e+06
Q8K370	Acyl-CoA dehydrogenase family member 10 OS=Mus musculus OX=10090 GN=Acad10 PE=1 SV=1	Acad10	8	8	97	8	118.9	1.18012e+07	1.23504e+07	1.04191e+07	1.17226e+07	1.56031e+07	1.04057e+07	1.00211e+07	1.93781e+06	1.36628e+07	2.67364e+06	4.46331e+06	2.6372e+06	7.16889e+06	2.13333e+06	9.05015e+06	9.67101e+06	7.23263e+06	4.62861e+06
Q8R5C5	Beta-centractin OS=Mus musculus OX=10090 GN=Actr1b PE=1 SV=1	Actr1b	34	10	105	5	42.3	5.34951e+06	5.54727e+06	4.11045e+06	6.66986e+06	8.21047e+06	1.89675e+06	4.07688e+06	3.5702e+06	5.37006e+06	4.45737e+06	4.55234e+06	3.45135e+06	3.92831e+06	4.78844e+06	5.0054e+06	3.2402e+06	4.5268e+06	4.39372e+06
Q8BJW6	Eukaryotic translation initiation factor 2A OS=Mus musculus OX=10090 GN=Eif2a PE=1 SV=2	Eif2a	18	8	76	8	64.4	4.14232e+06	3.41961e+06	3.10344e+06	1.64094e+06	4.78072e+06	4.21649e+06	4.41935e+06	4.3871e+06	3.19272e+06	4.22296e+06	3.33705e+06	3.10493e+06	5.13044e+06	2.2699e+06	4.83682e+06	5.25303e+06	4.18246e+06	4.3276e+06
Q99LC5	Electron transfer flavoprotein subunit alpha, mitochondrial OS=Mus musculus OX=10090 GN=Etfa PE=1 SV=2	Etfa	52	13	255	13	35	6.75571e+08	8.22454e+08	8.72128e+08	8.09929e+08	9.52362e+08	6.86887e+08	7.12481e+08	7.12783e+08	6.47825e+08	6.17703e+08	6.63785e+08	6.06176e+08	6.31557e+08	5.3783e+08	5.86486e+08	5.25989e+08	6.31813e+08	7.39077e+08
Q8R3F5	Malonyl-CoA-acyl carrier protein transacylase, mitochondrial OS=Mus musculus OX=10090 GN=Mcat PE=1 SV=3	Mcat	22	6	44	6	41.9	1.87953e+06	2.00742e+06	928091	1.79723e+06	2.01046e+06	1.37465e+06	1.36067e+06	1.50831e+06	1.99677e+06	1.55134e+06	1.44096e+06	2.16939e+06	1.26145e+06	2.2711e+06	1.0886e+06	1.52516e+06	1.64222e+06	1.76318e+06
Q921F4	Heterogeneous nuclear ribonucleoprotein L-like OS=Mus musculus OX=10090 GN=Hnrnpll PE=1 SV=3	Hnrnpll	5	2	18	2	64.1	351755	313121	171451	468725	262232	107908	215715	361028	440433	321386	466800	426831	288139	432035	708408	223082	291109	379551
Q9Z1X4	Interleukin enhancer-binding factor 3 OS=Mus musculus OX=10090 GN=Ilf3 PE=1 SV=2	Ilf3	2	1	7	1	96	120852	101605	97453.6	230557	156570	42921.4	77583.6	119504	104874	128569	42017.9	51190.6	88097.7	117883	117998	75183.4	150899	160537
Q9WUK2	Eukaryotic translation initiation factor 4H OS=Mus musculus OX=10090 GN=Eif4h PE=1 SV=3	Eif4h	16	4	26	4	27.3	1.98219e+06	2.09859e+06	2.17285e+06	1.96491e+06	2.75654e+06	1.90573e+06	2161792	2.13274e+06	2.5196e+06	2.33506e+06	1.83041e+06	1.73264e+06	1.95161e+06	2.56703e+06	3.00127e+06	2.05675e+06	1.99142e+06	1.86692e+06
P14094	Sodium/potassium-transporting ATPase subunit beta-1 OS=Mus musculus OX=10090 GN=Atp1b1 PE=1 SV=1	Atp1b1	29	7	77	7	35.2	1.70736e+07	1.14749e+07	5.85473e+06	1.64001e+07	2.66201e+07	8.88259e+06	1.208e+07	9.22699e+06	2.52702e+07	1.64128e+07	6.05971e+06	1.97589e+07	1.01919e+07	5.1365e+06	5.2565e+06	1.15582e+07	1.44423e+07	9.54809e+06
P11404	Fatty acid-binding protein, heart OS=Mus musculus OX=10090 GN=Fabp3 PE=1 SV=5	Fabp3	65	9	556	9	14.8	3.39638e+08	2.57512e+08	1.85342e+08	3.71613e+08	5.68111e+08	2.47768e+08	2.96733e+08	2.48883e+08	5.98846e+08	4.53906e+08	1.62346e+08	2.96665e+08	3.15285e+08	2.45421e+08	2.15485e+08	3.90316e+08	3.58704e+08	2.00506e+08
Q920E5	Farnesyl pyrophosphate synthase OS=Mus musculus OX=10090 GN=Fdps PE=1 SV=1	Fdps	26	7	39	7	40.6	705922	974740	1.83049e+06	1.95181e+06	1.99003e+06	1.91965e+06	3.22994e+06	1.51719e+06	1.8433e+06	1.34805e+06	1.12223e+06	963592	2.04288e+06	1.04962e+06	1.09524e+06	1.20249e+06	1.90564e+06	2.16458e+06
P30115	Glutathione S-transferase A3 OS=Mus musculus OX=10090 GN=Gsta3 PE=1 SV=2	Gsta3	31	6	34	5	25.3	1.93918e+06	1.49563e+06	3.01892e+06	2.25392e+06	7.64508e+06	3.26532e+06	3.13831e+07	7.76674e+06	8.63911e+06	5.48714e+06	1.68635e+06	1.21322e+07	3.06642e+06	2.81123e+06	9.91983e+06	7.97603e+06	2.49637e+06	7.36965e+06
Q60668	Heterogeneous nuclear ribonucleoprotein D0 OS=Mus musculus OX=10090 GN=Hnrnpd PE=1 SV=2	Hnrnpd	15	5	59	3	38.3	6.16054e+06	6.31625e+06	5.61652e+06	8.24031e+06	1.13496e+07	3.96265e+06	4.62434e+06	4.62656e+06	7.06042e+06	4.94165e+06	4.09695e+06	4.60902e+06	4.02807e+06	4.15648e+06	8.34565e+06	6.16828e+06	5.86995e+06	7.30404e+06
Q8BGD9	Eukaryotic translation initiation factor 4B OS=Mus musculus OX=10090 GN=Eif4b PE=1 SV=1	Eif4b	22	12	112	12	68.8	8.07813e+06	9.76702e+06	8.94486e+06	1.12052e+07	1.03148e+07	1.09659e+07	1.17732e+07	1.05765e+07	1.04032e+07	1.08834e+07	1.21136e+07	9.16236e+06	1.05686e+07	1.2278e+07	1.11156e+07	1.07631e+07	9.39411e+06	8.1257e+06
Q3UZ39	Leucine-rich repeat flightless-interacting protein 1 OS=Mus musculus OX=10090 GN=Lrrfip1 PE=1 SV=2	Lrrfip1	2	1	8	1	79.2	345657	569868	575944	669961	543000	250333	391418		358682	346053	587147	311136	364607	440065	461526	328956	472375	534827
Q62082	Myosin regulatory light chain 10 OS=Mus musculus OX=10090 GN=Myl10 PE=2 SV=1	Myl10	25	5	64	3	22.5	2.30016e+06	575049	341859	1.66277e+06	2.4684e+06	136327	844009	995960	2.48966e+06	1.4181e+06	92258.8	1.71331e+06	728789	199130	885532	950059	1.44349e+06	711637
Q9DCZ4	MICOS complex subunit Mic26 OS=Mus musculus OX=10090 GN=Apoo PE=1 SV=2	Apoo	49	7	106	7	22.6	3.66928e+07	2.32339e+07	1.61974e+07	2.49974e+07	3.61348e+07	2.01407e+07	2.05378e+07	2.14563e+07	3.55198e+07	2.95389e+07	2.12305e+07	3.23022e+07	2.5389e+07	2.24484e+07	2.09346e+07	2.77096e+07	3.1376e+07	2.55146e+07
Q9D1H9	Microfibril-associated glycoprotein 4 OS=Mus musculus OX=10090 GN=Mfap4 PE=1 SV=1	Mfap4	22	4	49	4	28.9	4.10304e+06	3.35188e+06	2.04881e+06	4.36517e+06	5.01437e+06	2.2706e+06	3.2212e+06	2.48058e+06	7.56732e+06	2.68315e+06	1.94973e+06	3.19089e+06	3.10793e+06	2.52827e+06	5.75535e+06	3.00714e+06	3.5059e+06	3.27905e+06
Q8K3J1	NADH dehydrogenase [ubiquinone] iron-sulfur protein 8, mitochondrial OS=Mus musculus OX=10090 GN=Ndufs8 PE=1 SV=1	Ndufs8	30	8	173	8	24	1.1443e+08	7.39473e+07	6.06964e+07	8.28045e+07	1.24795e+08	6.5314e+07	7.01858e+07	6.0178e+07	1.08093e+08	6.87583e+07	5.1205e+07	1.01166e+08	7.10732e+07	6.13458e+07	6.24599e+07	7.27058e+07	6.78006e+07	7.01824e+07
O08601	Microsomal triglyceride transfer protein large subunit OS=Mus musculus OX=10090 GN=Mttp PE=1 SV=2	Mttp	7	4	5	4	99		8705.2	34138.4	103734	84503.9	112916	382908	127045		93936.5	65502.6	221387	148194			183405	13222	56149.7
Q9WVQ5	Methylthioribulose-1-phosphate dehydratase OS=Mus musculus OX=10090 GN=Apip PE=1 SV=1	Apip	33	6	56	6	26.9	4.77517e+06	6.72064e+06	6.56328e+06	7.71488e+06	1.02038e+07	5.30486e+06	5.34243e+06	4.88683e+06	4.59467e+06	6.26079e+06	5.43645e+06	6.46089e+06	4.66386e+06	4.95097e+06	3.71341e+06	4.99946e+06	6.28523e+06	5.30741e+06
O08638	Myosin-11 OS=Mus musculus OX=10090 GN=Myh11 PE=1 SV=1	Myh11	31	54	603	38	226.9	5.2093e+07	1.95419e+07	2.33908e+07	1.90246e+07	2.53984e+07	1.72642e+07	2.36164e+07	3.06439e+07	4.87946e+07	3.02282e+07	2.76799e+07	3.22018e+07	2.61166e+07	4.13811e+07	5.6714e+07	3.48706e+07	4.15466e+07	3.30757e+07
Q5SYD0	Unconventional myosin-Id OS=Mus musculus OX=10090 GN=Myo1d PE=1 SV=1	Myo1d	1	1	4	1	116
D3YYU8	Obscurin-like protein 1 OS=Mus musculus OX=10090 GN=Obsl1 PE=1 SV=1	Obsl1	6	9	53	9	197.8	1.72323e+06	2.50147e+06	993300	1.76163e+06	1.55226e+06	478499	1.26784e+06	1.46313e+06	752113	914030	1.88016e+06	1.01586e+06	882831	2.07997e+06	957205	1.58407e+06	1.49714e+06	1.71965e+06
P27773	Protein disulfide-isomerase A3 OS=Mus musculus OX=10090 GN=Pdia3 PE=1 SV=2	Pdia3	39	19	252	19	56.6	4.74596e+07	4.14944e+07	3.72625e+07	4.64431e+07	5.56449e+07	2.94466e+07	4.01624e+07	4.34466e+07	6.19935e+07	4.16089e+07	3.68862e+07	3.46112e+07	3.33921e+07	4.50008e+07	8.46268e+07	4.66853e+07	4.0835e+07	4.15439e+07
Q8BFP9	[Pyruvate dehydrogenase (acetyl-transferring)] kinase isozyme 1, mitochondrial OS=Mus musculus OX=10090 GN=Pdk1 PE=1 SV=2	Pdk1	24	7	62	6	49	3.22541e+06	916185	735120	3.69053e+06	3.82479e+06	2.15945e+06	2.31649e+06	2.23617e+06	6.60698e+06	3.16017e+06	1.27427e+06	2.37225e+06	1.6826e+06	1.34838e+06	3.30962e+06	1.94541e+06	2.46226e+06	2.06663e+06
Q80YV4	4'-phosphopantetheine phosphatase OS=Mus musculus OX=10090 GN=Pank4 PE=1 SV=2	Pank4	21	15	146	15	91.5	5.0353e+06	5.62737e+06	4.63995e+06	1.28923e+07	1.11458e+07	5.21e+06	7.05318e+06	7.1524e+06	1.52602e+07	1.4514e+07	5.86864e+06	7.38857e+06	7.73591e+06	7.66751e+06	3.33889e+06	1.13128e+07	6.96234e+06	6.91414e+06
P11103	Poly [ADP-ribose] polymerase 1 OS=Mus musculus OX=10090 GN=Parp1 PE=1 SV=3	Parp1	1	1	8	1	113	927393	442577	603895	123464	418584	389051	111017	176080	382732	260382	501936			471825		249856	205134	90926.7
Q3UMR5	Calcium uniporter protein, mitochondrial OS=Mus musculus OX=10090 GN=Mcu PE=1 SV=2	Mcu	32	9	66	9	39.7	4.55594e+06	4.1997e+06	3.4474e+06	4.57366e+06	5.12527e+06	3.55827e+06	4.35812e+06	4.945e+06	6.86378e+06	6.86457e+06	6.99961e+06	7.42165e+06	5.20614e+06	4.96624e+06	4.27105e+06	5.22481e+06	6.44263e+06	5.28824e+06
Q8VCX5	Calcium uptake protein 1, mitochondrial OS=Mus musculus OX=10090 GN=Micu1 PE=1 SV=1	Micu1	8	3	16	3	54.3	1.10409e+06	1.52112e+06	1.02984e+06	1.75177e+06	1.66127e+06	1.06036e+06	1.042e+06	868201	1.17026e+06	694723	496854	1.12388e+06	739310	1.32997e+06	984894	688687	543944	540337
Q62000	Mimecan OS=Mus musculus OX=10090 GN=Ogn PE=1 SV=1	Ogn	38	9	145	9	34	4.31466e+07	4.52875e+07	1.46046e+07	3.10407e+07	3.68284e+07	1.80884e+07	3.17835e+07	3.042e+07	3.70013e+07	3.54083e+07	3.17694e+07	3.22591e+07	3.10986e+07	3.02768e+07	3.88736e+07	3.91614e+07	3.13892e+07	2.9644e+07
Q9D6Y7	Mitochondrial peptide methionine sulfoxide reductase OS=Mus musculus OX=10090 GN=Msra PE=1 SV=1	Msra	17	3	46	3	26	2.24236e+06	731380	249529	1.38169e+06	1.18838e+06	907337	617790	1.26443e+06	2.34103e+06	2.3165e+06	1.4659e+06	2.88338e+06	1.50711e+06	1.67738e+06	2.85695e+06	1.43489e+06	2.26648e+06	1.55372e+06
Q5SX39	Myosin-4 OS=Mus musculus OX=10090 GN=Myh4 PE=2 SV=1	Myh4	82	306	53930	88	222.7	1.15878e+11	1.23964e+11	1.24791e+11	1.20649e+11	1.05955e+11	1.26818e+11	1.1999e+11	1.22473e+11	1.03494e+11	1.15685e+11	1.263e+11	1.12521e+11	1.18167e+11	1.25358e+11	1.18385e+11	1.23162e+11	1.20407e+11	1.2808e+11
P70670	Nascent polypeptide-associated complex subunit alpha, muscle-specific form OS=Mus musculus OX=10090 GN=Naca PE=1 SV=2	Naca	45	67	1049	67	220.4	1.90018e+08	1.91802e+08	1.74095e+08	2.14877e+08	2.31743e+08	1.66856e+08	2.00632e+08	1.99433e+08	2.32444e+08	2.21784e+08	2.01366e+08	1.85595e+08	1.94129e+08	2.28505e+08	1.73082e+08	1.94066e+08	2.19312e+08	1.90791e+08
Q9DCN2	NADH-cytochrome b5 reductase 3 OS=Mus musculus OX=10090 GN=Cyb5r3 PE=1 SV=3	Cyb5r3	50	11	138	11	34.1	1.56738e+07	9.73203e+06	1.06553e+07	1.27842e+07	2.11045e+07	4.61136e+06	1.15409e+07	1.11805e+07	1.46298e+07	1.29769e+07	1.00082e+07	1.41768e+07	9.3136e+06	1.18014e+07	1.94046e+07	1.2176e+07	1.38436e+07	1.55984e+07
Q9Z176	Serine/threonine-protein phosphatase 2A regulatory subunit B'' subunit delta OS=Mus musculus OX=10090 GN=Ppp2r3d PE=2 SV=1	Ppp2r3d	2	1	9	1	55.7	647205	570539	456867	711138	758902	915319	832183	593669	836198	757613	674508	1.1159e+06	1.12263e+06	1.03079e+06	1.15057e+06	991668	623869	597526
Q91ZA3	Propionyl-CoA carboxylase alpha chain, mitochondrial OS=Mus musculus OX=10090 GN=Pcca PE=1 SV=2	Pcca	31	17	212	17	79.9	4.90039e+07	3.59738e+07	2.37107e+07	4.00211e+07	5.03444e+07	3.06584e+07	3.29634e+07	2.90979e+07	4.48601e+07	3.87087e+07	2.54252e+07	4.4549e+07	3.21346e+07	2.54786e+07	2.76245e+07	2.36275e+07	4.08182e+07	2.8444e+07
Q8K183	Pyridoxal kinase OS=Mus musculus OX=10090 GN=Pdxk PE=1 SV=1	Pdxk	20	4	17	4	35	1.62008e+06	382932	226753	664581	666997	439882	1.25621e+06	1.2864e+06	3.73955e+06	1.65285e+06	417009	1.9932e+06	649094	704541	4.35827e+06	1.05091e+06	1.22881e+06	1.09797e+06
P28653	Biglycan OS=Mus musculus OX=10090 GN=Bgn PE=1 SV=1	Bgn	45	12	228	11	41.6	5.59381e+07	5.93389e+07	1.5185e+07	5.03593e+07	6.5617e+07	2.16822e+07	4.17537e+07	3.64855e+07	4.23635e+07	4.39889e+07	3.39731e+07	4.68105e+07	2.54115e+07	3.09485e+07	3.26267e+07	4.35046e+07	3.89574e+07	4.26071e+07
Q9WU28	Prefoldin subunit 5 OS=Mus musculus OX=10090 GN=Pfdn5 PE=1 SV=1	Pfdn5	42	4	28	4	17.3	3.16844e+06	2.6439e+06	2.02352e+06	3.85807e+06	5.84347e+06	3.04698e+06	3584007	2.88161e+06	4.83353e+06	4.10793e+06	2.84992e+06	4.03951e+06	2.68103e+06	2.86351e+06	2.67558e+06	2.3338e+06	3.39276e+06	2.97046e+06
P61759	Prefoldin subunit 3 OS=Mus musculus OX=10090 GN=Vbp1 PE=1 SV=2	Vbp1	39	7	72	7	22.4	3.9293e+06	2.86916e+06	2.56335e+06	4.55108e+06	2.03002e+06	2.95953e+06	3.67857e+06	3.71898e+06	4.80174e+06	4.14557e+06	4.67822e+06	3.8499e+06	3.56684e+06	3.34558e+06	2.76844e+06	3.3522e+06	3.35789e+06	3.88074e+06
Q91VF2	Histamine N-methyltransferase OS=Mus musculus OX=10090 GN=Hnmt PE=1 SV=1	Hnmt	6	1	6	1	33.6						303320		192410		160792	349144	326619	154237	166253	196839	240628	233647	230431
Q7TMK9	Heterogeneous nuclear ribonucleoprotein Q OS=Mus musculus OX=10090 GN=Syncrip PE=1 SV=2	Syncrip	33	15	168	15	69.6	1.35979e+07	1.55338e+07	1.38029e+07	1.11967e+08	7.73778e+07	1.41493e+07	1.46866e+07	1.52811e+07	1.82734e+07	8.17024e+07	1.38231e+07	6.86941e+07	6.01636e+07	6.66681e+07	1.75184e+07	1.26667e+07	7.77804e+07	1.51543e+07
Q8R081	Heterogeneous nuclear ribonucleoprotein L OS=Mus musculus OX=10090 GN=Hnrnpl PE=1 SV=2	Hnrnpl	24	10	75	10	63.9	1.31322e+07	1.1257e+07	1.01082e+07	1.20444e+07	1.21824e+07	1.24161e+07	1.2753e+07	1.04112e+07	1.34793e+07	1.33894e+07	9.42806e+06	1.51019e+07	9.32193e+06	1.21882e+07	1.7198e+07	1.44057e+07	1.27766e+07	1.36681e+07
O55135	Eukaryotic translation initiation factor 6 OS=Mus musculus OX=10090 GN=Eif6 PE=1 SV=2	Eif6	7	1	6	1	26.5	175350	162282	119588	150406				162245				80250		238320	369254	183512
P52480	Pyruvate kinase PKM OS=Mus musculus OX=10090 GN=Pkm PE=1 SV=4	Pkm	80	46	2628	44	57.8	3.65255e+09	3.61675e+09	3.52203e+09	3.05609e+09	2.76615e+09	3.24986e+09	3.05774e+09	3.61634e+09	3.0766e+09	3.53233e+09	3.77961e+09	3.22188e+09	3.44765e+09	3.3241e+09	3.68162e+09	3.78967e+09	3.32643e+09	3.6934e+09
P05132	cAMP-dependent protein kinase catalytic subunit alpha OS=Mus musculus OX=10090 GN=Prkaca PE=1 SV=3	Prkaca	37	11	178	4	40.5	2.94982e+07	2.47532e+07	2.23366e+07	3.08215e+07	3.99093e+07	2.60325e+07	3.56204e+07	3.29296e+07	6.34666e+07	2.82722e+07	2.65277e+07	3.39212e+07	4.1862e+07	2.74959e+07	3.54321e+07	3.57039e+07	4.01169e+07	4.55171e+07
P20444	Protein kinase C alpha type OS=Mus musculus OX=10090 GN=Prkca PE=1 SV=3	Prkca	9	6	38	3	76.8	1.68942e+07	3.06191e+07	1.03955e+07	6.3141e+06	5.21201e+06	1.43537e+07	1.63947e+07	1.09016e+07	1.14607e+07	1.38457e+07	1.16728e+07	3.25152e+07	1.18662e+07	2.5405e+07	1.59363e+07	2.63944e+07	2.85181e+07	3.22329e+07
O88952	Protein lin-7 homolog C OS=Mus musculus OX=10090 GN=Lin7c PE=1 SV=2	Lin7c	19	3	19	3	21.8	1.55036e+06	572548	1.21914e+06	907994	1.6171e+06	1.62296e+06	833684	1.54529e+06	2.12618e+06	805105	1.29333e+06	827409	1.64176e+06	1.47122e+06	2.07693e+06	1.03026e+06	1.64594e+06	1.63951e+06
Q99JW4	LIM and senescent cell antigen-like-containing domain protein 1 OS=Mus musculus OX=10090 GN=Lims1 PE=1 SV=3	Lims1	23	5	45	5	37.2	1.69224e+06	1.2962e+06	362757	875944	274010	1.06817e+06	994173	1.80418e+06	2.16937e+06	1.43712e+06	1.08507e+06	1.69819e+06	1.80695e+06	2.17087e+06	2.3252e+06	2.79997e+06	2.09858e+06	1.79425e+06
A2AJI0	MAP7 domain-containing protein 1 OS=Mus musculus OX=10090 GN=Map7d1 PE=1 SV=1	Map7d1	1	1	2	1	93.2
P57787	Monocarboxylate transporter 4 OS=Mus musculus OX=10090 GN=Slc16a3 PE=1 SV=1	Slc16a3	17	6	109	6	50.3	9.50757e+06	1.17617e+07	7.97512e+06	1.08442e+07	1.49503e+07	1.37898e+07	1.38071e+07	1.50808e+07	1.19739e+07	1.51892e+07	1.25494e+07	1.72962e+07	1.44447e+07	1.94706e+07	1.60257e+07	1.23979e+07	1.17653e+07	1.44438e+07
Q8R1F1	Protein Niban 2 OS=Mus musculus OX=10090 GN=Niban2 PE=1 SV=2	Niban2	3	1	1	1	84.8		156968			456583	97591.4				246780	153628				307603		267796	235205
Q99PG2	Opioid growth factor receptor OS=Mus musculus OX=10090 GN=Ogfr PE=1 SV=1	Ogfr	9	2	18	2	70.6	1.05194e+06	1.2567e+06	1.08156e+06	1.09261e+06	1.47253e+06	1.11482e+06	1.08605e+06	878580	1.71746e+06	1.48372e+06	990780	1.07769e+06		603688	1.00177e+06	1.09964e+06	1.29957e+06	983741
Q3TIU4	2',5'-phosphodiesterase 12 OS=Mus musculus OX=10090 GN=Pde12 PE=1 SV=2	Pde12	6	2	18	2	67.5	266331		242734	102772	324834			463065	370674	475562	314004	405708	362488	322543	309666	117231	486890	477834
Q9JHU2	Palmdelphin OS=Mus musculus OX=10090 GN=Palmd PE=1 SV=1	Palmd	10	4	19	4	62.7	498862	264520	506419	843243	674386	238918	963172	1.09929e+06	1.90012e+06	1.65734e+06	241491	1.15843e+06	310976	959847	1.21898e+06	1.27731e+06	7.70478e+06	378850
Q61768	Kinesin-1 heavy chain OS=Mus musculus OX=10090 GN=Kif5b PE=1 SV=3	Kif5b	25	18	136	18	109.5	1.112e+07	1.09328e+07	1.22875e+07	1.03773e+07	1.58491e+07	9.79902e+06	8.90883e+06	1.06455e+07	1.29233e+07	9.35806e+06	7.52291e+06	9.52627e+06	9.5775e+06	1.0155e+07	1.04587e+07	9.7447e+06	1.08489e+07	1.12258e+07
O88447	Kinesin light chain 1 OS=Mus musculus OX=10090 GN=Klc1 PE=1 SV=3	Klc1	13	5	34	3	61.4	1.53389e+06	1.73407e+06	1.24571e+06	1.7824e+06	2.66888e+06	1.26764e+06	788515	2.37768e+06	1.93468e+06	2.00037e+06	2.75722e+06	1.09764e+06	770998	1.21474e+06	2.37225e+06	1.13928e+06	2.14761e+06	2.00417e+06
O35367	Keratocan OS=Mus musculus OX=10090 GN=Kera PE=2 SV=1	Kera	40	11	168	11	40.4	1.98555e+07	2.4345e+07	280665	2.73022e+07	4.63712e+07	1.57289e+07	6.58073e+07	1.84724e+07	400162	5.41293e+07	1.25441e+06	4.62877e+07	4.09867e+07	3.41806e+07	3.26708e+06	5.56996e+07	2.7636e+07	3.30849e+07
P97927	Laminin subunit alpha-4 OS=Mus musculus OX=10090 GN=Lama4 PE=1 SV=2	Lama4	12	17	164	17	201.7	9.38865e+06	6.46912e+06	4.08772e+06	4.52502e+06	1.34171e+07	3.76515e+06	5.0238e+06	6.41109e+06	1.22472e+07	7.68776e+06	4.93534e+06	7.60496e+06	6.71958e+06	1.08432e+07	1.46148e+07	5.96179e+06	9.71397e+06	7.59326e+06
Q8BKY8	Transcription termination factor 2, mitochondrial OS=Mus musculus OX=10090 GN=Mterf2 PE=1 SV=1	Mterf2	4	1	6	1	43.4	423421	327593		457120	744947			1.13969e+06	520487	554720	186952	446494	900268	116830	149411	247907	327876	211543
Q61879	Myosin-10 OS=Mus musculus OX=10090 GN=Myh10 PE=1 SV=2	Myh10	12	22	257	5	228.9	2.21943e+06	1.52706e+06	1.24101e+06	2.09191e+06	2.27448e+06	564872	1913561	1.49066e+06	2.35314e+06	2.5402e+06	915599	589004	575341	799801	1.00395e+06	1.31146e+06	1.28926e+06	1.12147e+06
Q5DTJ9	Myopalladin OS=Mus musculus OX=10090 GN=Mypn PE=1 SV=2	Mypn	15	17	175	16	144	2.14386e+07	2.15226e+07	2.15726e+07	2.57434e+07	2.64068e+07	2.09219e+07	23699679	1.97341e+07	2.3899e+07	2.53448e+07	2.00035e+07	1.97165e+07	1.9315e+07	1.89212e+07	1.67203e+07	1.65919e+07	2.13741e+07	2.80117e+07
Q9ES74	Serine/threonine-protein kinase Nek7 OS=Mus musculus OX=10090 GN=Nek7 PE=1 SV=1	Nek7	44	10	56	10	34.5	1.00703e+06	1.19797e+06	1.94306e+06	573255	1.76712e+06	1.43988e+06	2.40295e+06	2.24415e+06	182867	1.85892e+06	1.73189e+06	1.88093e+06	1.1219e+06	1.64999e+06	967380	494878	1.92154e+06	1.55866e+06
Q9CQZ5	NADH dehydrogenase [ubiquinone] 1 alpha subcomplex subunit 6 OS=Mus musculus OX=10090 GN=Ndufa6 PE=1 SV=1	Ndufa6	59	8	164	8	15.3	7.40962e+07	4.8398e+07	4.37116e+07	5.55078e+07	8.21414e+07	4.63698e+07	5.70405e+07	4.48172e+07	9.04026e+07	6.49386e+07	3.85343e+07	6.85662e+07	5.34e+07	5.25109e+07	5.68228e+07	4.19182e+07	5.45644e+07	5.21947e+07
Q9WVD5	Mitochondrial ornithine transporter 1 OS=Mus musculus OX=10090 GN=Slc25a15 PE=1 SV=1	Slc25a15	8	2	19	2	32.8	443135	416400	249473	253219	520309	273042	689280	312700	476362	381480	332247	362843	183214	239173	200014	207620	277539	436733
Q3ULW8	Protein mono-ADP-ribosyltransferase PARP3 OS=Mus musculus OX=10090 GN=Parp3 PE=2 SV=1	Parp3	8	3	10	3	59.9	144934	164260	128085	206530	168381	175344	154948	56630.3	96084.7	137378	93497.5	155277	153870	125200	131498	126694	106722	123516
Q99JX4	Eukaryotic translation initiation factor 3 subunit M OS=Mus musculus OX=10090 GN=Eif3m PE=1 SV=1	Eif3m	21	6	51	6	42.5	3.25081e+06	5.22841e+06	3.7066e+06	5.31611e+06	5.8771e+06	3.99082e+06	2.93091e+06	3.69956e+06	3.25081e+06	3.89024e+06	4.31605e+06	5.93512e+06	2.85184e+06	4.14434e+06	3.60735e+06	3.95494e+06	3.0784e+06	5.24928e+06
Q8VEH5	EPM2A-interacting protein 1 OS=Mus musculus OX=10090 GN=Epm2aip1 PE=1 SV=1	Epm2aip1	19	7	32	7	70.1	2.28675e+06	2.01942e+06	2.7079e+06	1.47822e+06	2.66113e+06	3.12127e+06	3.0181e+06	2.62917e+06	2.02335e+06	3.14638e+06	2.98326e+06	3.5345e+06	3.77903e+06	1.51028e+06	2.80171e+06	2.92322e+06	3.33571e+06	4.21855e+06
Q60902	Epidermal growth factor receptor substrate 15-like 1 OS=Mus musculus OX=10090 GN=Eps15l1 PE=1 SV=3	Eps15l1	8	5	52	5	99.2	1.93109e+06	1.47392e+06	949783	1.37296e+06	1.66447e+06	674555	1.45734e+06	1.53742e+06	1.76568e+06	1.08299e+06	1.03123e+06	1.02372e+06	1.12342e+06	1.03678e+06	1.37112e+06	702702	1.37744e+06	717818
Q3U0V1	Far upstream element-binding protein 2 OS=Mus musculus OX=10090 GN=Khsrp PE=1 SV=2	Khsrp	15	7	40	6	76.7	4.99406e+06	5.10292e+06	6.0416e+06	4.39762e+06	5.9991e+06	4.3299e+06	3.66609e+06	4.32997e+06	5.36303e+06	3.84552e+06	4.58108e+06	4.14429e+06	4.86134e+06	4.93581e+06	7.32223e+06	4.10935e+06	4.84604e+06	5.40965e+06
Q61035	Histidine--tRNA ligase, cytoplasmic OS=Mus musculus OX=10090 GN=Hars1 PE=1 SV=2	Hars1	27	15	154	15	57.4	1.2822e+07	1.29783e+07	1.01872e+07	1.84187e+07	1.10361e+07	1.18785e+07	1.66067e+07	1.4033e+07	1.45587e+07	1.02726e+07	1.2948e+07	1.35575e+07	1.12882e+07	1.27992e+07	1.52913e+07	1.14005e+07	1.56603e+07	1.49572e+07
Q9D1G3	Protein-cysteine N-palmitoyltransferase HHAT-like protein OS=Mus musculus OX=10090 GN=Hhatl PE=1 SV=2	Hhatl	28	13	231	13	56.4	6.82669e+07	5.93169e+07	5.72468e+07	5.31511e+07	8.76238e+07	8.43851e+07	6.88396e+07	7.39936e+07	8.12108e+07	6.93643e+07	8.15028e+07	8.74532e+07	1.01518e+08	8.5819e+07	1.08485e+08	1.01965e+08	8.39247e+07	8.16361e+07
Q9WTL7	Acyl-protein thioesterase 2 OS=Mus musculus OX=10090 GN=Lypla2 PE=1 SV=1	Lypla2	44	6	60	6	24.8	4.32312e+06	4.1932e+06	4.27023e+06	3.82695e+06	4.48937e+06	5.44458e+06	3.1262e+06	3.63722e+06	3.21604e+06	3.18688e+06	3.93636e+06	3.16282e+06	5.89445e+06	4.79958e+06	4.24312e+06	3.96211e+06	3.32487e+06	3.62932e+06
Q80U93	Nuclear pore complex protein Nup214 OS=Mus musculus OX=10090 GN=Nup214 PE=1 SV=2	Nup214	1	1	11	1	212.8	143724	203720	129193	136240	213711	74148.2	101938	114974	150739	97343.4	87422.8	132827	142326	148732	185336	157415	104529	160170
Q9CQJ2	PIH1 domain-containing protein 1 OS=Mus musculus OX=10090 GN=Pih1d1 PE=1 SV=1	Pih1d1	7	1	10	1	32.2	108233	93473.3	199025	247023	213204	94888.3	118155	108291	109291	103053	118004	123510	126547	94621.4	144205	140531	147480	162941
Q9QUR7	Peptidyl-prolyl cis-trans isomerase NIMA-interacting 1 OS=Mus musculus OX=10090 GN=Pin1 PE=1 SV=1	Pin1	25	3	36	3	18.4	2.50298e+06	2.18231e+06	2.26168e+06	2.65771e+06	3.6129e+06	2.24162e+06	2.06955e+06	2.64361e+06	3.63847e+06	3.07888e+06	2.38012e+06	2.18675e+06	663933	778945	2.59568e+06	2.0814e+06	2.29799e+06	2.25942e+06
Q8VC12	Urocanate hydratase OS=Mus musculus OX=10090 GN=Uroc1 PE=1 SV=2	Uroc1	4	2	2	2	74.5			52107.9				1.22328e+06	282016		65073.4		264855			86940.1			91455.7
A2AJ76	Hemicentin-2 OS=Mus musculus OX=10090 GN=Hmcn2 PE=1 SV=1	Hmcn2	0	1	1	1	546.9		41255.9							140733
P0CW02	Lymphocyte antigen 6C1 OS=Mus musculus OX=10090 GN=Ly6c1 PE=2 SV=1	Ly6c1	28	2	12	2	14.2	1.52435e+06	1.56779e+06	1.04257e+06	1.84653e+06	2.66386e+06	1.29638e+06		908244	1.74788e+06	786743	844051	760907	703927	677890	785979	475513	721737
Q61166	Microtubule-associated protein RP/EB family member 1 OS=Mus musculus OX=10090 GN=Mapre1 PE=1 SV=3	Mapre1	13	3	43	2	30	2.20382e+06	2.29696e+06	1.83549e+06	749853	1.53127e+06	558948	1.36224e+06	1.33122e+06	1.62028e+06	1.14614e+06	2.03063e+06	1.16096e+06	2.81826e+06	492387	2.97684e+06	898754	3.00595e+06	2.23911e+06
Q8VCF0	Mitochondrial antiviral-signaling protein OS=Mus musculus OX=10090 GN=Mavs PE=1 SV=1	Mavs	27	8	97	8	53.4	5.23468e+06	8.91792e+06	2.02644e+06	3.36756e+06	6.21004e+06	1.00116e+07	2.20007e+06	2.97795e+06	9.46008e+06	5.81232e+06	2.16051e+06	1.33722e+07	2.72901e+06	1.98274e+06	2.80627e+06	3.90495e+06	3.37698e+06	4.06333e+06
Q9CQB2	MAPK regulated corepressor interacting protein 2 OS=Mus musculus OX=10090 GN=Mcrip2 PE=1 SV=1	Mcrip2	7	1	1	1	17.9
Q78IK4	MICOS complex subunit Mic27 OS=Mus musculus OX=10090 GN=Apool PE=1 SV=1	Apool	48	9	124	9	29.2	1.91781e+07	1.16717e+07	8.14248e+06	1.15989e+07	2.08153e+07	1.09689e+07	1.02767e+07	1.01974e+07	2.08575e+07	1.55817e+07	9.73498e+06	1.83217e+07	1.19534e+07	1.11548e+07	1.21124e+07	1.02744e+07	1.30167e+07	1.05171e+07
Q7TNS2	MICOS complex subunit Mic10 OS=Mus musculus OX=10090 GN=Micos10 PE=1 SV=1	Micos10	21	2	24	2	8.6	2.64471e+06	1.30905e+06	1.34801e+06	1.35211e+06	5.05671e+06	1.84452e+06	2.43242e+06	1.45734e+06	2.78826e+06	3.24179e+06	1.61794e+06	2.20292e+06	1.71274e+06	1.4439e+06	1.78296e+06	1.47903e+06	2.27063e+06	2.63564e+06
Q8BLU2	Protein-lysine methyltransferase METTL21C OS=Mus musculus OX=10090 GN=Mettl21c PE=2 SV=1	Mettl21c	31	4	48	4	27.9	373211	2.39556e+06	1.50391e+06	4.75884e+06	1.67036e+06	4.17135e+06	2.58853e+06	4.0209e+06	1.20166e+06	4.04612e+06	3.77941e+06	569471	3.12456e+06	3.58087e+06	2.18152e+06	2.52758e+06	2.29757e+06	2.51332e+06
P47802	Metaxin-1 OS=Mus musculus OX=10090 GN=Mtx1 PE=1 SV=1	Mtx1	20	6	44	6	35.6	4.94747e+06	5.28735e+06	5.23095e+06	5.98895e+06	1.08717e+07	5.86431e+06	6.501e+06	6.40478e+06	7.31445e+06	6.72047e+06	6.36454e+06	7.01793e+06	5.78685e+06	4.22786e+06	8.11291e+06	6.23509e+06	6.59447e+06	8.81694e+06
P28660	Nck-associated protein 1 OS=Mus musculus OX=10090 GN=Nckap1 PE=1 SV=2	Nckap1	2	2	4	2	128.7					1.9919e+06				998604		213539	1.79988e+06			1.54169e+06		3.12693e+06	1.39223e+06
Q3UHB1	5'-nucleotidase domain-containing protein 3 OS=Mus musculus OX=10090 GN=Nt5dc3 PE=1 SV=1	Nt5dc3	23	9	58	9	63.1	3.2784e+06	2.18842e+06	2.87226e+06	2.49196e+06	2.02181e+06	3.01839e+06	2.15279e+06	4.24814e+06	4.35112e+06	2.56442e+06	2.71142e+06	4.22818e+06	3.59137e+06	3.29443e+06	3.35489e+06	2.39374e+06	4.07987e+06	3.64484e+06
Q91V92	ATP-citrate synthase OS=Mus musculus OX=10090 GN=Acly PE=1 SV=1	Acly	29	27	213	27	119.7	7.72066e+07	4.64723e+07	4.3756e+07	5.72189e+07	8.18761e+07	4.77434e+07	5.08479e+07	5.9721e+07	1.10121e+08	6.68227e+07	3.93348e+07	8.07694e+07	6.41391e+07	6.34908e+07	1.45603e+08	4.75674e+07	6.21526e+07	4.90996e+07
Q8BRK8	5'-AMP-activated protein kinase catalytic subunit alpha-2 OS=Mus musculus OX=10090 GN=Prkaa2 PE=1 SV=3	Prkaa2	30	14	154	13	62	1.38728e+07	1.6072e+07	1.65873e+07	1.84455e+07	1.36605e+07	1.4384e+07	1.51613e+07	1.39539e+07	1.3218e+07	1.31623e+07	1.41149e+07	1.43461e+07	1.29385e+07	1.18085e+07	1.13652e+07	1.27895e+07	1.46057e+07	1.70777e+07
O70456	14-3-3 protein sigma OS=Mus musculus OX=10090 GN=Sfn PE=1 SV=2	Sfn	16	5	218	1	27.7	4.74228e+07	3.17278e+07	2.74654e+07	5.80013e+07	5.9653e+07	5.48182e+07	49814276	4.66504e+07	6.08933e+07	5.47162e+07	4.85332e+07	4.35829e+07	4.58419e+07	4.56417e+07	5.27021e+07	3.51447e+07	5.37708e+07	5.06319e+07
Q9Z0X1	Apoptosis-inducing factor 1, mitochondrial OS=Mus musculus OX=10090 GN=Aifm1 PE=1 SV=1	Aifm1	32	15	176	15	66.7	2.8152e+07	2.08973e+07	1.69301e+07	2.28249e+07	3.08533e+07	1.39631e+07	1.97031e+07	1.66867e+07	2.60138e+07	2.14181e+07	1.33068e+07	2.64403e+07	1.75525e+07	1.25062e+07	1.43862e+07	1.59119e+07	2.05487e+07	1.84225e+07
Q8R1Q3	Angiopoietin-related protein 7 OS=Mus musculus OX=10090 GN=Angptl7 PE=2 SV=1	Angptl7	3	1	3	1	39
P97429	Annexin A4 OS=Mus musculus OX=10090 GN=Anxa4 PE=1 SV=4	Anxa4	36	10	118	9	35.9	6.98212e+06	6.42193e+06	3.49996e+06	6.86134e+06	8.50558e+06	4.46031e+06	4.86022e+06	6.13213e+06	1.11514e+07	8.92963e+06	6.20637e+06	5.75457e+06	6.48394e+06	3.11106e+06	7.33848e+06	4.72258e+06	4.73075e+06	6.61313e+06
O09131	Glutathione S-transferase omega-1 OS=Mus musculus OX=10090 GN=Gsto1 PE=1 SV=2	Gsto1	38	9	112	9	27.5	1.65937e+07	1.47862e+07	1.12512e+07	2.13373e+07	1.83967e+07	1.24813e+07	1.49362e+07	1.23273e+07	1.89784e+07	1.90817e+07	8.62444e+06	1.13205e+07	1.27096e+07	1.09168e+07	1.42977e+07	1.64148e+07	1.36121e+07	1.49021e+07
P51859	Hepatoma-derived growth factor OS=Mus musculus OX=10090 GN=Hdgf PE=1 SV=2	Hdgf	42	8	120	8	26.3	9.31096e+06	9.76266e+06	9.67823e+06	1.02523e+07	8.99551e+06	6.16278e+06	9.38545e+06	7.67193e+06	9.68321e+06	8.64497e+06	6.44032e+06	7.56324e+06	8.54355e+06	6.82537e+06	9.66837e+06	6.74076e+06	8.00218e+06	9.07905e+06
Q505F5	Leucine-rich repeat-containing protein 47 OS=Mus musculus OX=10090 GN=Lrrc47 PE=1 SV=1	Lrrc47	16	7	58	7	63.6	2.23002e+06	2.72119e+06	1.73192e+06	2.06613e+06	2.31152e+06	2.43931e+06	2.07673e+06	2.99269e+06	3.19632e+06	2.56931e+06	2.24648e+06	2.33714e+06	2.57387e+06	2.24778e+06	3.11013e+06	1.70565e+06	2.07469e+06	2.81042e+06
Q60675	Laminin subunit alpha-2 OS=Mus musculus OX=10090 GN=Lama2 PE=1 SV=2	Lama2	38	88	1121	88	343.6	1.29536e+08	1.37443e+08	1.33806e+08	1.49423e+08	1.75765e+08	1.49992e+08	1.38144e+08	1.35703e+08	1.27077e+08	1.28031e+08	8.54868e+07	1.12671e+08	1.4602e+08	1.38619e+08	1.0481e+08	1.23532e+08	1.35355e+08	1.38809e+08
Q78ZA7	Nucleosome assembly protein 1-like 4 OS=Mus musculus OX=10090 GN=Nap1l4 PE=1 SV=1	Nap1l4	34	8	141	7	42.7	1.27521e+07	1.3427e+07	1.37601e+07	1.62365e+07	1.6624e+07	1.23438e+07	1.21301e+07	1.46836e+07	2.25688e+07	1.67963e+07	1.3284e+07	1.37676e+07	1.3679e+07	1.75685e+07	1.92096e+07	1.59912e+07	1.7844e+07	1.6293e+07
P03899	NADH-ubiquinone oxidoreductase chain 3 OS=Mus musculus OX=10090 GN=Mtnd3 PE=1 SV=3	Mtnd3	13	1	17	1	13.2	635038	386822	190844	253659	225187	375492	258602	357704	1.01639e+06	545397	343630	927032	484951	356582	680519	555947	449024	511655
Q99JB8	Protein kinase C and casein kinase II substrate protein 3 OS=Mus musculus OX=10090 GN=Pacsin3 PE=1 SV=1	Pacsin3	45	15	169	15	48.6	2.1277e+07	2.54602e+07	2.81362e+07	2.39563e+07	2.24976e+07	2.59733e+07	2.41774e+07	2.58518e+07	2.32668e+07	2.34616e+07	2.77974e+07	2.05656e+07	1.9054e+07	2.71112e+07	1.98851e+07	2.46736e+07	2.59349e+07	2.52715e+07
Q9JHW2	Omega-amidase NIT2 OS=Mus musculus OX=10090 GN=Nit2 PE=1 SV=1	Nit2	41	8	87	8	30.5	1.07106e+07	1.05892e+07	1.05188e+07	6.79289e+06	1.46826e+07	9.05988e+06	9.29553e+06	7.11261e+06	1.18436e+07	8.79849e+06	8.33664e+06	1.12469e+07	7.20575e+06	1.04562e+07	9.1341e+06	8.72732e+06	1.07835e+07	1.12639e+07
B1AUE5	Peroxisome biogenesis factor 10 OS=Mus musculus OX=10090 GN=Pex10 PE=2 SV=1	Pex10	2	1	8	1	37.1		628984	718147			745194			797815		871824		1.0486e+06	739548		1.06233e+06		1.0243e+06
Q8BZF8	Phosphoglucomutase-like protein 5 OS=Mus musculus OX=10090 GN=Pgm5 PE=1 SV=2	Pgm5	8	5	63	4	62.2		375719		1.20625e+06	1.20338e+06		247294	251119	2.86012e+06	2.72325e+06	308231	1.2107e+06	1.47405e+06		870779	649421	562155	334799
Q9JHK4	Geranylgeranyl transferase type-2 subunit alpha OS=Mus musculus OX=10090 GN=Rabggta PE=1 SV=1	Rabggta	22	9	69	9	64.9	1.14063e+07	8.08715e+06	1.64174e+07	1.21071e+07	9.56253e+06	6.7295e+06	1.736e+07	1.56485e+07	1.84966e+07	1.68578e+07	6.41305e+06	1.41669e+07	6.24489e+06	9.68663e+06	8.90231e+06	8.20891e+06	5.11521e+06	4.5305e+06
Q80UG2	Plexin-A4 OS=Mus musculus OX=10090 GN=Plxna4 PE=1 SV=3	Plxna4	1	2	33	2	212.4	7.82036e+06	1.22184e+07	1.65844e+07	4.3877e+06	7.81122e+06	7.17028e+06	6.54693e+06	9.85221e+06	5.13765e+06	8.77774e+06	6.91829e+06	5.58124e+06	7.95047e+06	3.94468e+06	6.79742e+06	8.0488e+06	7.92693e+06	7.63325e+06
Q9CXI5	Mesencephalic astrocyte-derived neurotrophic factor OS=Mus musculus OX=10090 GN=Manf PE=1 SV=1	Manf	21	3	12	3	20.4	1.3193e+06	1.36196e+06	1.30538e+06	1.34791e+06	1.48537e+06	1.46494e+06	1.38077e+06	1.62301e+06	1.5111e+06	1.67215e+06	1.63793e+06	2.01857e+06	1.88638e+06	1.90261e+06	1.95047e+06	1.94277e+06	1.73137e+06	2.0027e+06
Q9D967	Magnesium-dependent phosphatase 1 OS=Mus musculus OX=10090 GN=Mdp1 PE=1 SV=1	Mdp1	21	2	24	2	18.6	1.57407e+06	3.01448e+06	1.1641e+06	2.69618e+06	5.10422e+06	2.28462e+06	2.07454e+06	1.76344e+06	2.75167e+06	2.86128e+07	1.36265e+06	2.01632e+06	2.00775e+06	1.33789e+06	1.37395e+06	2.95691e+07	1.96213e+06	1.96864e+06
A2AQP0	Myosin-7B OS=Mus musculus OX=10090 GN=Myh7b PE=3 SV=1	Myh7b	11	32	3106	10	221.4	1.89025e+07	1.28188e+07	1.01122e+07	1.04827e+07	9.20369e+06	1.63782e+07	1.15897e+07	9.64996e+06	9.88939e+06	1.65817e+07	1.1411e+07	1.23637e+07	1.30265e+07	1.78939e+07	1.12775e+07	1.25428e+07	1.27495e+07	1.24773e+07
Q5SX40	Myosin-1 OS=Mus musculus OX=10090 GN=Myh1 PE=1 SV=1	Myh1	78	259	40162	52	223.2	1.21562e+10	4.45387e+09	2.23404e+09	4.85739e+09	1.24907e+10	2.5964e+09	4.5222e+09	3.65969e+09	1.35234e+10	5.52639e+09	2.46339e+09	1.02747e+10	5.34023e+09	2.42398e+09	3.56026e+09	4.11882e+09	6.9127e+09	3.01403e+09
P24526	Myelin P2 protein OS=Mus musculus OX=10090 GN=Pmp2 PE=2 SV=2	Pmp2	14	2	32	1	14.9	155279	533783		147011	2.99923e+06		242004	628062	279492				968750	1.28134e+06	550099		767838
Q9CZH7	Matrix-remodeling-associated protein 7 OS=Mus musculus OX=10090 GN=Mxra7 PE=1 SV=2	Mxra7	8	2	6	2	19.4	2.40438e+06	1.68574e+06	1.11685e+06	1.50654e+06	2.49715e+06	1.06983e+06	1.47265e+06	1.79198e+06	2.5078e+06	2.03087e+06	1.67592e+06	1.59498e+06	1.43177e+06	1.76053e+06	1.48354e+06	1.60802e+06	2.33234e+06	2.12006e+06
Q99JR6	Nicotinamide/nicotinic acid mononucleotide adenylyltransferase 3 OS=Mus musculus OX=10090 GN=Nmnat3 PE=1 SV=1	Nmnat3	31	6	34	6	27.7	2.57091e+07	2.20333e+07	3.09369e+07	1.92804e+07	1.63838e+07	2.02334e+07	1.67505e+07	2.1468e+07	1.67036e+07	2.24237e+07	2.35375e+07	2.04986e+07	2.30936e+07	1.00228e+07	9.4713e+06	1.5214e+07	2.10989e+07	1.28898e+07
Q9DCT2	NADH dehydrogenase [ubiquinone] iron-sulfur protein 3, mitochondrial OS=Mus musculus OX=10090 GN=Ndufs3 PE=1 SV=2	Ndufs3	56	13	275	13	30.1	1.49156e+08	1.13383e+08	1.05062e+08	1.35502e+08	2.09269e+08	1.01224e+08	9.91291e+07	8.59874e+07	1.58304e+08	1.31911e+08	8.28508e+07	1.35427e+08	1.10764e+08	6.67304e+07	8.04896e+07	9.00458e+07	1.15583e+08	9.38006e+07
Q3TJD7	PDZ and LIM domain protein 7 OS=Mus musculus OX=10090 GN=Pdlim7 PE=1 SV=1	Pdlim7	26	8	366	8	50.1	2.88695e+08	4.90325e+08	4.65969e+08	4.51409e+08	2.76669e+08	3.65825e+08	3.80396e+08	4.0509e+08	2.50463e+08	3.21686e+08	4.09133e+08	3.34191e+08	3.67748e+08	3.48776e+08	3.15287e+08	3.34991e+08	3.22991e+08	3.35117e+08
E9QA62	Leiomodin-3 OS=Mus musculus OX=10090 GN=Lmod3 PE=1 SV=1	Lmod3	25	12	97	12	65.6	7.66036e+06	5.25234e+06	6.2304e+06	7.06917e+06	8.83723e+06	4.92441e+06	6.057e+06	4.36061e+06	9.26938e+06	5.49755e+06	6.38546e+06	5.95403e+06	5.65676e+06	6.22644e+06	4.67155e+06	5.35796e+06	6.9594e+06	5.14948e+06
Q8C052	Microtubule-associated protein 1S OS=Mus musculus OX=10090 GN=Map1s PE=1 SV=2	Map1s	3	2	5	2	102.9		86641.2	66650.1	82778.5	74707.3	36840	36270.2	49512.2	42216.8	36083.7	59570.7	32937.6	23142.4	32143	30399.5	29958.2	81424.2	89729.6
Q01768	Nucleoside diphosphate kinase B OS=Mus musculus OX=10090 GN=Nme2 PE=1 SV=1	Nme2	68	9	277	5	17.4	1.97287e+08	1.84286e+08	1.46416e+08	1.5673e+08	1.80624e+08	2.18369e+08	2.04641e+08	1.71301e+08	2.0133e+08	2.0517e+08	1.74369e+08	1.95767e+08	2.15879e+08	2.08274e+08	1.88185e+08	2.03584e+08	2.12507e+08	1.84167e+08
Q9CQ65	S-methyl-5'-thioadenosine phosphorylase OS=Mus musculus OX=10090 GN=Mtap PE=1 SV=1	Mtap	32	7	76	7	31	5.08656e+06	5.34761e+06	4.58419e+06	2.91164e+06	2.51675e+06	4.80512e+06	4.82184e+06	4.65201e+06	3.70496e+06	3.56482e+06	4.46214e+06	4.16466e+06	3.92435e+06	5.82708e+06	6.32661e+06	5.60373e+06	5.19056e+06	4.5122e+06
Q9EQS3	c-Myc-binding protein OS=Mus musculus OX=10090 GN=Mycbp PE=1 SV=5	Mycbp	17	1	14	1	12	328581	170941	151670	155892	152476	242953	180754	156366	295155	335482	150392	149667	286070	295542	488503	368676	287108	209276
Q6P9R2	Serine/threonine-protein kinase OSR1 OS=Mus musculus OX=10090 GN=Oxsr1 PE=1 SV=1	Oxsr1	23	9	125	9	58.2	1.36545e+07	1.23159e+07	1.46269e+07	1.4286e+07	1.85495e+07	1.43896e+07	1.27067e+07	1.42731e+07	1.37046e+07	1.50263e+07	1.51616e+07	1.46476e+07	1.48405e+07	1.27352e+07	1.33232e+07	1.3696e+07	1.54122e+07	1.38019e+07
P29758	Ornithine aminotransferase, mitochondrial OS=Mus musculus OX=10090 GN=Oat PE=1 SV=1	Oat	41	11	131	11	48.3	1.76717e+07	1.88067e+07	1.269e+07	1.67074e+07	2.91634e+07	1.1107e+07	1.24013e+07	8.12436e+06	1.65211e+07	1.41233e+07	1.07809e+07	1.57754e+07	1.4088e+07	1.23461e+07	1.42117e+07	1.68542e+07	1.41409e+07	1.22198e+07
Q9WU78	Programmed cell death 6-interacting protein OS=Mus musculus OX=10090 GN=Pdcd6ip PE=1 SV=3	Pdcd6ip	22	16	151	16	96	6.37698e+07	4.94919e+07	3.26356e+07	4.83419e+07	5.60661e+07	4.29193e+07	4.57294e+07	4.21542e+07	8.29873e+07	4.27785e+07	2.74142e+07	6.25838e+07	4.18461e+07	3.36315e+07	3.70038e+07	4.93239e+07	4.02133e+07	4.10158e+07
Q05793	Basement membrane-specific heparan sulfate proteoglycan core protein OS=Mus musculus OX=10090 GN=Hspg2 PE=1 SV=1	Hspg2	30	72	929	72	398	4.82195e+08	5.56099e+08	5.0389e+08	5.47464e+08	5.41768e+08	5.2944e+08	3.5979e+08	4.23843e+08	3.75874e+08	4.18655e+08	4.0548e+08	5.01238e+08	4.42023e+08	3.8037e+08	2.36764e+08	3.88106e+08	4.91847e+08	4.52255e+08
Q921G7	Electron transfer flavoprotein-ubiquinone oxidoreductase, mitochondrial OS=Mus musculus OX=10090 GN=Etfdh PE=1 SV=1	Etfdh	44	21	359	21	68	1.03876e+08	6.65207e+07	5.29523e+07	7.2192e+07	1.16212e+08	6.83511e+07	7.93451e+07	6.49489e+07	9.89746e+07	9.26813e+07	4.96617e+07	9.98825e+07	8.08837e+07	5.43822e+07	6.26012e+07	7.567e+07	8.35887e+07	6.66891e+07
Q8BZ52	Fibronectin type III and SPRY domain-containing protein 2 OS=Mus musculus OX=10090 GN=Fsd2 PE=1 SV=3	Fsd2	31	14	104	14	81.4	8.1971e+06	1.19147e+07	1.0773e+07	1.38176e+07	8.73924e+06	9.45967e+06	8.66986e+06	8.92269e+06	8.14778e+06	8.57118e+06	9.72997e+06	8.4457e+06	8.21723e+06	1.00771e+07	7.60273e+06	8.79457e+06	1.19526e+07	8.41342e+06
Q9D164	FXYD domain-containing ion transport regulator 6 OS=Mus musculus OX=10090 GN=Fxyd6 PE=1 SV=2	Fxyd6	23	1	1	1	10.4
Q9D6Y9	1,4-alpha-glucan-branching enzyme OS=Mus musculus OX=10090 GN=Gbe1 PE=1 SV=1	Gbe1	37	18	183	18	80.3	2.8056e+07	1.22024e+07	8.07867e+06	1.43538e+07	2.34131e+07	9.50717e+06	1.17138e+07	1.0466e+07	3.02971e+07	1.50598e+07	1.03108e+07	3.00275e+07	1.14778e+07	1.00016e+07	1.26002e+07	1.22977e+07	1.46013e+07	1.08209e+07
P14220	Glycophorin-A OS=Mus musculus OX=10090 GN=Gypa PE=1 SV=2	Gypa	18	1	2	1	17.7
Q61316	Heat shock 70 kDa protein 4 OS=Mus musculus OX=10090 GN=Hspa4 PE=1 SV=1	Hspa4	42	28	369	28	94.1	4.95017e+07	5.04295e+07	4.55534e+07	4.89094e+07	6.52689e+07	4.70906e+07	5.33968e+07	4.81043e+07	6.09572e+07	5.41117e+07	4.09058e+07	4.67062e+07	4.45168e+07	5.01665e+07	4.87299e+07	4.7766e+07	5.4963e+07	5.54442e+07
Q5EBG6	Heat shock protein beta-6 OS=Mus musculus OX=10090 GN=Hspb6 PE=1 SV=1	Hspb6	77	7	127	7	17.5	5.896e+07	3.40659e+07	1.09777e+07	5.73574e+07	7.5455e+07	2.28898e+07	4.02914e+07	3.01705e+07	1.40345e+08	4.92414e+07	2.34081e+07	3.46093e+07	2.91794e+07	2.63687e+07	3.20653e+07	3.74474e+07	4.72426e+07	2.67135e+07
Q8K0U4	Heat shock 70 kDa protein 12A OS=Mus musculus OX=10090 GN=Hspa12a PE=1 SV=1	Hspa12a	3	2	4	1	74.8					680741										464944
P51125	Calpastatin OS=Mus musculus OX=10090 GN=Cast PE=1 SV=2	Cast	23	10	106	10	84.9	2.86804e+06	2.73696e+06	2.57126e+06	3.44972e+06	5.10958e+06	3.03312e+06	1.90231e+06	2.21664e+06	1.50806e+07	7.60035e+06	2.45072e+06	7.77669e+06	1.14996e+06	3.67152e+06	6.44535e+06	4.75325e+06	4.38176e+06	1.60407e+06
Q91VC3	Eukaryotic initiation factor 4A-III OS=Mus musculus OX=10090 GN=Eif4a3 PE=1 SV=3	Eif4a3	14	7	52	4	46.8	939535	1.172e+06	375034	1.22813e+06	1.27647e+06	881676	1.3378e+06	1.58917e+06	1.74722e+06	1.46664e+06	1.71568e+06	1.40568e+06	1.05688e+06	1.55067e+06	2.56258e+06	1.25878e+06	746375	1.80463e+06
O08677	Kininogen-1 OS=Mus musculus OX=10090 GN=Kng1 PE=1 SV=1	Kng1	23	13	161	13	73.1	3.60535e+07	2.41063e+07	3.16339e+07	2.76123e+07	3.67968e+07	2.25097e+07	3.28887e+07	3.77948e+07	5.55529e+07	3.22716e+07	3.28263e+07	3.07031e+07	2.15157e+07	2.36337e+07	6.82198e+07	3.57356e+07	3.96348e+07	3.69655e+07
P57759	Endoplasmic reticulum resident protein 29 OS=Mus musculus OX=10090 GN=Erp29 PE=1 SV=2	Erp29	20	6	52	6	28.8	5.3634e+06	4.93947e+06	3.57601e+06	4.54424e+06	6.29137e+06	1.81778e+06	3.57394e+06	4.28616e+06	5.21772e+06	3.98181e+06	4.87032e+06	5.01017e+06	4.15166e+06	4.0368e+06	9.21486e+06	4.04924e+06	3.85764e+06	4.65539e+06
Q8CIB5	Fermitin family homolog 2 OS=Mus musculus OX=10090 GN=Fermt2 PE=1 SV=1	Fermt2	29	15	142	15	77.8	7.19388e+06	4.9258e+06	4.52869e+06	7.83218e+06	8.68103e+06	4.7403e+06	9.65296e+06	7.50028e+06	8.57072e+06	8.7192e+06	5.20588e+06	7.63329e+06	6.97851e+06	7.38309e+06	8.4524e+06	7.19676e+06	8.69156e+06	9.59888e+06
P97447	Four and a half LIM domains protein 1 OS=Mus musculus OX=10090 GN=Fhl1 PE=1 SV=3	Fhl1	73	21	511	21	31.9	4.53115e+08	1.86209e+08	8.00908e+07	3.68236e+08	5.69263e+08	9.08978e+07	1.64017e+08	1.84266e+08	1.09462e+09	4.14536e+08	1.35451e+08	3.28228e+08	2.18935e+08	1.30941e+08	2.40574e+08	2.45892e+08	3.00486e+08	1.76108e+08
O54865	Guanylate cyclase soluble subunit beta-1 OS=Mus musculus OX=10090 GN=Gucy1b1 PE=1 SV=1	Gucy1b1	2	1	2	1	70.6	318004				295928						115824
D3Z7P3	Glutaminase kidney isoform, mitochondrial OS=Mus musculus OX=10090 GN=Gls PE=1 SV=1	Gls	7	3	47	3	73.9	1.58589e+06	479652	576524	485881	543322	803481	723517	957649	1.31112e+06	1.18643e+06	751276	1.86801e+06	799849	1.08089e+06	1.13567e+06	1.28116e+06	1.23236e+06	913638
O89017	Legumain OS=Mus musculus OX=10090 GN=Lgmn PE=1 SV=1	Lgmn	3	1	12	1	49.3	779535	511570		561190	2.01483e+06	720514	940321	1.05062e+06	2.22473e+06	1.43838e+06	1.19908e+06	1.03692e+06	888157	853398	1.71765e+06	1.06482e+06	1.06042e+06	1.5081e+06
Q7TNC4	Putative RNA-binding protein Luc7-like 2 OS=Mus musculus OX=10090 GN=Luc7l2 PE=1 SV=1	Luc7l2	4	2	4	2	46.6	549847	301039	530419		1.00868e+06			257221	1.01457e+06	668981	382266		255020	314882	1.72506e+06	823405	496061	859191
P21619	Lamin-B2 OS=Mus musculus OX=10090 GN=Lmnb2 PE=1 SV=2	Lmnb2	28	15	140	11	67.3	6.88363e+06	6.67309e+06	5.48317e+06	7.44441e+06	6.64303e+06	6.47142e+06	7.41951e+06	6.64851e+06	8.36712e+06	8.35469e+06	8.30546e+06	7.37745e+06	7.88763e+06	6.51377e+06	8.11588e+06	6.81955e+06	6.95273e+06	6.6866e+06
P62774	Myotrophin OS=Mus musculus OX=10090 GN=Mtpn PE=1 SV=2	Mtpn	31	3	35	3	12.9	952196	1.11098e+06	726019	1.76332e+06	1.95901e+06	666749	2.15624e+06	1.0229e+06	2.99116e+06	1.74033e+06	755967	315774	1.71632e+06	795646	3.42342e+06	281990	313937	2.1234e+06
Q6ZPE2	Myotubularin-related protein 5 OS=Mus musculus OX=10090 GN=Sbf1 PE=1 SV=2	Sbf1	1	1	4	1	208.6	312747			299324	484820		140735	187271	213560	185623		179261	183235	310864	212439	188390	163059	263158
P09541	Myosin light chain 4 OS=Mus musculus OX=10090 GN=Myl4 PE=1 SV=3	Myl4	36	6	197	4	21.1	2.87236e+06	1.99039e+06	776661	2.13825e+06	2.83445e+06	2.21153e+06	2.71176e+06	4.3143e+06	3.04348e+06	2.79834e+06	2.65835e+06	2.30535e+06	1.85424e+06	2.77524e+06	2.73101e+06	2.36204e+06	2.13043e+06	3.29163e+06
Q61749	Translation initiation factor eIF-2B subunit delta OS=Mus musculus OX=10090 GN=Eif2b4 PE=1 SV=2	Eif2b4	5	2	18	2	57.6	306136	301211	367829	449210	331998	322339	511638	814268	1.08339e+06	722078	769393	634883	196921	588711	695331	734592	369495	935743
Q3UVK0	Endoplasmic reticulum metallopeptidase 1 OS=Mus musculus OX=10090 GN=Ermp1 PE=1 SV=2	Ermp1	2	1	1	1	100.1
Q80X90	Filamin-B OS=Mus musculus OX=10090 GN=Flnb PE=1 SV=3	Flnb	13	25	310	16	277.7	1.40585e+07	1.07672e+07	6.88844e+06	1.13898e+07	1.99008e+07	1.38334e+07	1.08944e+07	1.99079e+07	1.49063e+07	1.68901e+07	9.38526e+06	1.71647e+07	2.0962e+07	1.47604e+07	3.44449e+07	8.30619e+06	1.16984e+07	9.25732e+06
Q9JJ28	Protein flightless-1 homolog OS=Mus musculus OX=10090 GN=Flii PE=1 SV=1	Flii	8	7	18	7	144.7	554109	842110	199782	577005	1.77274e+06	1.16881e+06	583218	1.00645e+06	745579	1.18559e+06	1.29489e+06	522925	920000	991988	1.29672e+06	868833	577981	1.4138e+06
P49710	Hematopoietic lineage cell-specific protein OS=Mus musculus OX=10090 GN=Hcls1 PE=1 SV=2	Hcls1	8	3	3	3	54.2		166758	102316		58042.9	81160.6	110377	208845		92249					1.30609e+06		242476	221800
Q80Y14	Glutaredoxin-related protein 5, mitochondrial OS=Mus musculus OX=10090 GN=Glrx5 PE=1 SV=2	Glrx5	20	2	27	2	16.3	2.76446e+06	2.19751e+06	1.0566e+06	1.81692e+06	1.01049e+06	1.62654e+06	1.35005e+06	1.98327e+06	3.26682e+06	2.43171e+06	1.6345e+06	2.71633e+06	1.71393e+06	1.28534e+06	1.67872e+06	1.84615e+06	2.10743e+06	1.5831e+06
Q9DBP5	UMP-CMP kinase OS=Mus musculus OX=10090 GN=Cmpk1 PE=1 SV=1	Cmpk1	46	7	120	7	22.2	1.47889e+07	9.12645e+06	1.0105e+07	1.40334e+07	9.93072e+06	9.56696e+06	1.10741e+07	6.56297e+06	1.67884e+07	1.30854e+07	9.75202e+06	1.3785e+07	1.06489e+07	1.1338e+07	1.68376e+07	1.18846e+07	8.32056e+06	1.15278e+07
P08905	Lysozyme C-2 OS=Mus musculus OX=10090 GN=Lyz2 PE=1 SV=2	Lyz2	15	2	2	2	16.7			58402.5							75274.5	86173.2			60683.6	712156	70610.5	46117.7	96070
Q6URW6	Myosin-14 OS=Mus musculus OX=10090 GN=Myh14 PE=1 SV=1	Myh14	7	14	147	6	228.4	907658	1.04032e+06	885127	1.4622e+06	1.07225e+06	346570	1.36479e+06	569771	812177	1.31348e+06	550443	571019	443081	706050	627844	1.36141e+06	304388	544243
Q99M51	Cytoplasmic protein NCK1 OS=Mus musculus OX=10090 GN=Nck1 PE=1 SV=1	Nck1	7	2	21	2	42.9	729020	713612	777714	917799	1.10018e+06	484249	538507	587466	727559	582088	605556	559218	602446	680055	702978	609635	670674	697517
Q8BLF1	Neutral cholesterol ester hydrolase 1 OS=Mus musculus OX=10090 GN=Nceh1 PE=1 SV=1	Nceh1	7	3	18	3	45.7	2.87748e+06	1.50641e+06	797102	549626	471007	2.27632e+06	731249	349425	3.29638e+06	1.40896e+06	1.03249e+06	1.47953e+06	3.01086e+06	93080.6	1.07386e+06	1.51826e+06	1.54125e+06	1.1957e+06
Q6PDN3	Myosin light chain kinase, smooth muscle OS=Mus musculus OX=10090 GN=Mylk PE=1 SV=3	Mylk	2	5	40	4	212.8	1.92355e+06	22546.9	463394	926743	621602	179420	588149	1.0715e+06	1.28448e+06	950021	890812	1.33115e+06	757289	1.96642e+06	2.29451e+06	1.67109e+06	1.17114e+06	813152
P60202	Myelin proteolipid protein OS=Mus musculus OX=10090 GN=Plp1 PE=1 SV=2	Plp1	3	1	7	1	30.1		38697.2		59367.4	179838	48228.2		184610	90831.5	77660.1	98003.7	206616	227535	322681	352968	87866.6	276879	165414
Q80XB4	Nebulin-related-anchoring protein OS=Mus musculus OX=10090 GN=Nrap PE=1 SV=3	Nrap	27	44	339	44	195.6	5.58308e+07	4.67784e+07	4.23152e+07	6.12802e+07	1.29179e+08	6.48429e+07	6.18633e+07	5.72246e+07	9.37597e+07	8.56672e+07	3.76723e+07	9.01399e+07	8.4163e+07	5.04007e+07	5.84153e+07	5.52359e+07	6.75394e+07	5.32012e+07
Q07235	Glia-derived nexin OS=Mus musculus OX=10090 GN=Serpine2 PE=1 SV=2	Serpine2	7	2	9	2	44.2	807100	765072	776502	884162	1.06945e+06	698943	895162	760395	243307	774655	777129	664652	891221	726043	782630	709258	523554	682615
Q9D819	Inorganic pyrophosphatase OS=Mus musculus OX=10090 GN=Ppa1 PE=1 SV=1	Ppa1	62	14	205	14	32.6	2.71441e+07	3.25336e+07	2.11501e+07	3.56286e+07	3.31407e+07	2.31304e+07	3.20234e+07	1.65391e+07	3.1418e+07	2.65494e+07	1.97847e+07	2.70651e+07	1.43164e+07	4.63053e+07	3.3625e+07	2.82086e+07	1.69497e+07	1.97496e+07
Q9CR62	Mitochondrial 2-oxoglutarate/malate carrier protein OS=Mus musculus OX=10090 GN=Slc25a11 PE=1 SV=3	Slc25a11	54	15	371	15	34.1	1.93891e+08	1.29319e+08	8.37345e+07	1.4027e+08	2.20669e+08	9.00751e+07	1.19499e+08	8.83432e+07	1.85527e+08	1.30208e+08	7.91208e+07	1.69085e+08	9.16751e+07	7.95896e+07	7.20488e+07	7.98051e+07	1.16619e+08	1.07027e+08
Q8BPB0	MOB kinase activator 1B OS=Mus musculus OX=10090 GN=Mob1b PE=1 SV=3	Mob1b	11	2	21	2	25.1	3.05283e+06	2.00476e+06	1.8675e+06	2.33307e+06	3.00687e+06	1.59117e+06	1.49491e+06	1.76419e+06	2.62844e+06	2.07586e+06	1.89218e+06	1.8241e+06	1.93859e+06	1.75511e+06	2.57307e+06	2.03561e+06	2.35621e+06	2.55397e+06
Q02780	Nuclear factor 1 A-type OS=Mus musculus OX=10090 GN=Nfia PE=1 SV=1	Nfia	5	2	15	2	58.5	706875	643675	475047		830180	602121	484975	420090	1.19074e+06	535732	267507	546487	387293	439175	1.11656e+06	340743	419057	494672
Q99K41	EMILIN-1 OS=Mus musculus OX=10090 GN=Emilin1 PE=1 SV=1	Emilin1	1	1	2	1	107.5	473722		212325	351792	576113		229517					232658	258600
P84228	Histone H3.2 OS=Mus musculus OX=10090 GN=H3c2 PE=1 SV=2	H3c2	43	5	60	5	15.4	8.42235e+07	7.46199e+07	1.65607e+07	2.28602e+07	2.12653e+07	3.56314e+07	5.58682e+07	9.30543e+07	1.91203e+08	7.88977e+07	9.04934e+07	1.08843e+08	1.56794e+08	8.92118e+07	4.5287e+08	1.82999e+08	8.12617e+07	1.35236e+08
Q3UHX2	28 kDa heat- and acid-stable phosphoprotein OS=Mus musculus OX=10090 GN=Pdap1 PE=1 SV=1	Pdap1	28	5	28	5	20.6	4.10224e+06	3.28157e+06	3.71126e+06	3.20275e+06	2.89451e+06	3.90063e+06	4.43995e+06	4.42574e+06	4.37323e+06	4.8469e+06	1.44322e+07	6.66988e+06	5.10792e+06	5.43731e+06	9.00936e+06	5.93515e+06	5.70219e+06	4.06618e+06
Q3TBD2	Rho GTPase-activating protein 45 OS=Mus musculus OX=10090 GN=Arhgap45 PE=1 SV=2	Arhgap45	2	1	1	1	122.8															357644
O70252	Heme oxygenase 2 OS=Mus musculus OX=10090 GN=Hmox2 PE=1 SV=1	Hmox2	32	7	61	7	35.7	3.71378e+06	2.38142e+06	1.69267e+06	3.75165e+06	9.00064e+06	3.43809e+06	1.94908e+06	3.37776e+06	7.46873e+06	3.40275e+06	1.70064e+06	2.57818e+06	1.68735e+06	2.48114e+06	3.06427e+06	2.38332e+06	4.24971e+06	3.64965e+06
P48722	Heat shock 70 kDa protein 4L OS=Mus musculus OX=10090 GN=Hspa4l PE=1 SV=2	Hspa4l	2	1	10	1	94.3	140209	107927			212409		88514.3	102399	151944	91708.7	86390	138875	89084.4	116875	118313	63260.7	154502	159337
Q8R0N6	Hydroxyacid-oxoacid transhydrogenase, mitochondrial OS=Mus musculus OX=10090 GN=Adhfe1 PE=1 SV=2	Adhfe1	12	3	20	3	49.9	2.15453e+06	1.11336e+06	864455	2.13339e+06	1.55857e+06	1.73274e+06	1.84869e+06	1.05353e+06	1.56363e+06	1.37057e+06	895081	1.76362e+06	1.23237e+06	1.39778e+06	1.95959e+06	1.67509e+06	1.3975e+06	1.04014e+06
Q80UY2	E3 ubiquitin-protein ligase KCMF1 OS=Mus musculus OX=10090 GN=Kcmf1 PE=1 SV=1	Kcmf1	6	2	20	2	41.8	1.33147e+06	1.22798e+06	784154	1.52685e+06	1.16735e+06	751996	991082	318484	1.00195e+06	324696	770386	1.05254e+06	815448	1.48515e+06	478379	1.2259e+06	905850	261613
P06801	NADP-dependent malic enzyme OS=Mus musculus OX=10090 GN=Me1 PE=1 SV=2	Me1	37	16	182	16	63.9	3.12675e+07	3.87035e+07	3.75572e+07	2.50735e+07	2.21737e+07	3.2806e+07	2.94057e+07	3.1689e+07	5.94414e+07	2.76698e+07	3.4555e+07	2.88641e+07	2.89545e+07	3.12016e+07	9.26967e+07	3.00575e+07	2.83258e+07	4.20739e+07
Q8VCM8	Nicalin OS=Mus musculus OX=10090 GN=Ncln PE=1 SV=2	Ncln	6	4	31	4	62.9	4.62699e+06	2.99411e+06	4.22917e+06	4.92185e+06	5.16349e+06	3.66129e+06	3.77925e+06	4.4804e+06	4.6069e+06	4.44224e+06	4.085e+06	3.93087e+06	3.1769e+06	4.1755e+06	4.84196e+06	4.90353e+06	4.69363e+06	4.15536e+06
Q6PGB6	N-alpha-acetyltransferase 50 OS=Mus musculus OX=10090 GN=Naa50 PE=1 SV=1	Naa50	19	3	17	3	19.4	2.44307e+06	2.53727e+06	3.6672e+06	1.88556e+06	2.51442e+06	1.86755e+06	2.85938e+06	2.72145e+06	2.48873e+06	2.775e+06	3.14712e+06	3.0296e+06	3.23931e+06	2.29234e+06	2.5703e+06	1.74731e+06	2.48997e+06	3.11677e+06
Q9Z0E0	Neurochondrin OS=Mus musculus OX=10090 GN=Ncdn PE=1 SV=1	Ncdn	2	1	9	1	78.8	143300	171378	147327	131409	163407	79774.3	109292	114667	67814.5	82651.7	107339	130574	151784	104514	105729	124944	186168	189943
Q62234	Myomesin-1 OS=Mus musculus OX=10090 GN=Myom1 PE=1 SV=2	Myom1	79	111	2970	111	185.3	2.39535e+09	2.54241e+09	2.24694e+09	2.2403e+09	2.07829e+09	2.51119e+09	2.13709e+09	2.26194e+09	1.92531e+09	2.21916e+09	2.26278e+09	2.22785e+09	2.40767e+09	2.28168e+09	1.85342e+09	2.19479e+09	2.28797e+09	2.22887e+09
P62874	Guanine nucleotide-binding protein G(I)/G(S)/G(T) subunit beta-1 OS=Mus musculus OX=10090 GN=Gnb1 PE=1 SV=3	Gnb1	32	8	101	5	37.4	2.74522e+07	1.75148e+07	2.05274e+07	1.81197e+07	3.61603e+07	1.20734e+07	1.23922e+07	1.15265e+07	7.63777e+06	1.71967e+07	1.16745e+07	2.07249e+07	1.11241e+07	1.46984e+07	1.93303e+07	1.84118e+07	2.75123e+07	2.17801e+07
Q9JLM9	Growth factor receptor-bound protein 14 OS=Mus musculus OX=10090 GN=Grb14 PE=1 SV=1	Grb14	5	1	1	1	60.5		147418		510802		182343				143389			118054		393966
P08752	Guanine nucleotide-binding protein G(i) subunit alpha-2 OS=Mus musculus OX=10090 GN=Gnai2 PE=1 SV=5	Gnai2	24	7	95	4	40.5	9.46982e+06	6.04086e+06	5.64912e+06	7.08888e+06	9.58707e+06	5.51051e+06	7.85277e+06	8.85477e+06	8.47226e+06	7.88504e+06	7.48442e+06	1.15432e+07	5.74409e+06	1.05519e+07	1.90982e+07	9.02758e+06	9.51271e+06	1.06596e+07
Q9ESB3	Histidine-rich glycoprotein OS=Mus musculus OX=10090 GN=Hrg PE=1 SV=2	Hrg	7	3	8	3	59.1	2.46994e+07	3.23672e+07	3.4195e+07	3.48523e+07	2.30146e+07	2.78476e+07	1.90598e+07	3.29539e+07	2.88481e+07	3.27881e+07	2.42174e+07	2.10326e+07	2.59443e+07	1.60518e+07	1.91795e+07	1.49546e+07	2.62158e+07	2.36472e+07
P06330	Ig heavy chain V region AC38 205.12 OS=Mus musculus OX=10090 PE=1 SV=1	--	25	2	12	2	12.9									2.11548e+06	208522	752704		153481		2.14544e+06			706489
P31938	Dual specificity mitogen-activated protein kinase kinase 1 OS=Mus musculus OX=10090 GN=Map2k1 PE=1 SV=2	Map2k1	25	7	103	4	43.4	6.36353e+06	6.82402e+06	7.72117e+06	7.37337e+06	8.49295e+06	6.3566e+06	7531179	1.01984e+07	9.11746e+06	1.01206e+07	6.56573e+06	8.86497e+06	8.94494e+06	1.05305e+07	7.3287e+06	1.08178e+07	6.58197e+06	6.09204e+06
P53986	Monocarboxylate transporter 1 OS=Mus musculus OX=10090 GN=Slc16a1 PE=1 SV=1	Slc16a1	8	3	44	3	53.2	3.17964e+06	2.47975e+06	1.24816e+06	3.49071e+06	4.26617e+06	1.5148e+06	3.18551e+06	2.46466e+06	4.63981e+06	3.64651e+06	2.02559e+06	4.711e+06	1.83061e+06	2.2064e+06	3.50688e+06	3.32255e+06	3.01381e+06	2.13012e+06
Q9CQF4	Mitochondrial transcription rescue factor 1 OS=Mus musculus OX=10090 GN=Mtres1 PE=1 SV=1	Mtres1	7	2	18	2	27.8	2.04393e+06	941403	1.54802e+06	1.88524e+06	1.58455e+06	3.16717e+06	3.0005e+06	1.69782e+06	2.90481e+06	2.43796e+06	676661	3.35206e+06	2.61375e+06	2.05699e+06	2.08988e+06	2.48931e+06	2.13671e+06	1.54652e+06
Q791T5	Mitochondrial carrier homolog 1 OS=Mus musculus OX=10090 GN=Mtch1 PE=1 SV=1	Mtch1	10	3	14	3	41.5	1.42753e+06	889386		862626	2.10593e+06	494043	74248		1.57729e+06	1.16929e+06	119269	1.81003e+06	57828.2	92339	719150	1.27236e+06	804056	376685
P09542	Myosin light chain 3 OS=Mus musculus OX=10090 GN=Myl3 PE=1 SV=4	Myl3	85	22	1559	18	22.4	2.24855e+08	2.94535e+08	8.78987e+07	1.25546e+09	7.86978e+08	2.4403e+08	4.61425e+08	4.55655e+08	9.61624e+08	1.31663e+09	1.03667e+08	1.56311e+08	3.30668e+08	1.98888e+08	8.84292e+07	9.48721e+08	4.02535e+08	2.74922e+08
Q9D154	Leukocyte elastase inhibitor A OS=Mus musculus OX=10090 GN=Serpinb1a PE=1 SV=1	Serpinb1a	26	9	56	9	42.5	6.33231e+06	6.41805e+06	2.88413e+06	2.65364e+06	4.28159e+06	2.16598e+06	2.08042e+06	6.43966e+06	1.11544e+07	4.73273e+06	8.30438e+06	5.49472e+06	3.64207e+06	2.69228e+06	1.17385e+07	5.23485e+06	3.47722e+06	3.80925e+06
Q99M04	Lipoyl synthase, mitochondrial OS=Mus musculus OX=10090 GN=Lias PE=1 SV=1	Lias	3	1	2	1	41.9	150813	131323	70734.4	164684	46662.4	176130	142381	118630	244732	141720		276283		183819	258843	170669	80435.3
Q61001	Laminin subunit alpha-5 OS=Mus musculus OX=10090 GN=Lama5 PE=1 SV=4	Lama5	3	5	19	5	403.8	7.03408e+07	1.44231e+08	1.23377e+08	1.23523e+08	5.54002e+07	9.18896e+07	7.68512e+07	1.07883e+08	2.69691e+07	5.94967e+07	1.14161e+08	5.64497e+07	9.01347e+07	8.84449e+07	3.44131e+07	9.81174e+07	1.10052e+08	8.54205e+07
Q8K4G1	Latent-transforming growth factor beta-binding protein 4 OS=Mus musculus OX=10090 GN=Ltbp4 PE=1 SV=2	Ltbp4	3	3	10	3	178.5	1.49746e+06	1.09211e+06		1.34547e+06	745282	1.13282e+06	332005	334818	2.48017e+06	307484	883631	289919	796300	302991		712627	1.03574e+06	203008
Q9CXT8	Mitochondrial-processing peptidase subunit beta OS=Mus musculus OX=10090 GN=Pmpcb PE=1 SV=1	Pmpcb	26	9	59	8	54.6	2.17565e+06	2.3853e+06	1.70572e+06	1.5988e+06	3.08986e+07	1.71645e+06	2.33482e+06	2.72968e+06	3.121e+06	3.34573e+06	1.86205e+06	3.12815e+06	2.62581e+06	2.34158e+06	2.39345e+06	2.6349e+06	2.92786e+06	2.38642e+06
Q9JKS5	Intracellular hyaluronan-binding protein 4 OS=Mus musculus OX=10090 GN=Habp4 PE=1 SV=2	Habp4	4	1	5	1	45.9	107571				144971		95892.6	66271.2	81258	69824.5	53577.7	59290.9	68684.1	78376.4	86897.8	104945	116970	130361
Q2TPA8	Hydroxysteroid dehydrogenase-like protein 2 OS=Mus musculus OX=10090 GN=Hsdl2 PE=1 SV=1	Hsdl2	22	6	52	6	54.2	3.16971e+06	1.57459e+06	1.04288e+06	3.66835e+06	8.86146e+06	1.6157e+06	2.77084e+06	2.90302e+06	6.281e+06	3.9627e+06	1.07295e+06	4.05677e+06	2.87692e+06	715963	1.90477e+06	1.34981e+06	3.14844e+06	2.51829e+06
Q9D6R2	Isocitrate dehydrogenase [NAD] subunit alpha, mitochondrial OS=Mus musculus OX=10090 GN=Idh3a PE=1 SV=1	Idh3a	48	18	487	18	39.6	5.42865e+08	4.28861e+08	3.07019e+08	3.79725e+08	5.58779e+08	3.25131e+08	3.29833e+08	3.49322e+08	4.73557e+08	3.87527e+08	2.96101e+08	4.67294e+08	3.73354e+08	3.44911e+08	3.23414e+08	4.10826e+08	4.52027e+08	3.44517e+08
Q9CR41	Huntingtin-interacting protein K OS=Mus musculus OX=10090 GN=Hypk PE=1 SV=2	Hypk	6	1	9	1	14.7				996750	1.00976e+06								570258	704482	631016			79163.3
P04104	Keratin, type II cytoskeletal 1 OS=Mus musculus OX=10090 GN=Krt1 PE=1 SV=4	Krt1	7	6	89	1	65.6	4.83954e+06	3.00392e+06	2.78734e+06	2.56814e+06	2.30912e+06	2.46835e+06	2.7226e+06	2.44332e+06	3.46734e+06	810271	2.93627e+06	3.75204e+06	3.04157e+06	1.61142e+06	2.29783e+06	651485	2.94575e+06	784516
Q9CX00	IST1 homolog OS=Mus musculus OX=10090 GN=Ist1 PE=1 SV=1	Ist1	2	1	7	1	39.4	274747	309666	151029	250752	323811	258318	329209	264681	574764	140488	321307	517447	342454	459807	650217	321653	178049	285645
Q61830	Macrophage mannose receptor 1 OS=Mus musculus OX=10090 GN=Mrc1 PE=1 SV=2	Mrc1	5	6	44	6	164.9	2.73191e+06	2.62658e+06	1.38672e+06	1.38331e+06	2.73237e+06	1.24944e+06	1.1692e+06	1.51589e+06	3.11799e+06	1.71192e+06	1.45558e+06	1.75492e+06	1.40138e+06	500541	2.97505e+06	2.046e+06	1.78289e+06	1.58479e+06
Q5FW60	Major urinary protein 20 OS=Mus musculus OX=10090 GN=Mup20 PE=1 SV=1	Mup20	22	3	12	1	20.9	44395.5		49994.7	48892.8	77548.9	288630	229498	148696	95416.6	406657	140862	108558	85607.7	102201	184476	98437.4	115036
P03995	Glial fibrillary acidic protein OS=Mus musculus OX=10090 GN=Gfap PE=1 SV=4	Gfap	6	3	38	1	49.9	1.18285e+06	689242	547572	944975		797268	901517	1.20351e+06	639352	707602	368412	819309	1.35655e+06	802506	1.54244e+06		1.05802e+06
Q91WK5	Glycine cleavage system H protein, mitochondrial OS=Mus musculus OX=10090 GN=Gcsh PE=1 SV=2	Gcsh	6	1	14	1	18.6	2.53559e+06	2.46414e+06	1.17314e+06	1.37518e+06	1.67743e+06	1.71691e+06	1.76544e+06	1.99615e+06	2.83457e+06	2.39624e+06	2.10981e+06	2.59061e+06	1.77869e+06	747136	1.48579e+06	1.01338e+06	2.26369e+06	1.71975e+06
Q80SZ7	Guanine nucleotide-binding protein G(I)/G(S)/G(O) subunit gamma-5 OS=Mus musculus OX=10090 GN=Gng5 PE=1 SV=2	Gng5	13	1	14	1	7.3	2.61101e+06	2.40068e+06	1.59765e+06	2.52148e+06	2.80615e+06	1.93403e+06	1.7105e+06	1.40266e+06	2.75961e+06	1.53707e+06	1.77941e+06	2.28915e+06	1.71582e+06	1.66299e+06	2.88735e+06	1.26315e+06	1.62519e+06	1.87813e+06
P40936	Indolethylamine N-methyltransferase OS=Mus musculus OX=10090 GN=Inmt PE=1 SV=1	Inmt	29	6	44	6	29.4	1.21049e+06	1.39572e+06	2.80595e+06	1.63407e+06	2.71572e+06	3.14849e+06	7.02487e+06	3.43313e+06	1.90168e+06	1.86879e+06	1.94626e+06	2.88928e+06	2.52975e+06	1.30692e+06	7.39222e+06	2.85402e+06	1.46064e+06	3.1145e+06
Q80WJ7	Protein LYRIC OS=Mus musculus OX=10090 GN=Mtdh PE=1 SV=1	Mtdh	14	7	77	7	63.8	9.14999e+06	8.775e+06	6.70895e+06	8.67713e+06	8.70409e+06	8.94652e+06	1.16111e+07	9.75378e+06	1.41146e+07	9.35938e+06	9.85472e+06	1.38529e+07	1.11914e+07	1.09951e+07	9.94622e+06	9.69362e+06	9.33273e+06	1.05319e+07
P97823	Acyl-protein thioesterase 1 OS=Mus musculus OX=10090 GN=Lypla1 PE=1 SV=1	Lypla1	45	7	114	7	24.7	2.77952e+07	2.49222e+07	2.19902e+07	2.46952e+07	2.83289e+07	2.38932e+07	1.98788e+07	2.34322e+07	2.5093e+07	2.48614e+07	2.42326e+07	3.0047e+07	2.55792e+07	1.83821e+07	1.65673e+07	1.99671e+07	2.59003e+07	2.24063e+07
P20917	Myelin-associated glycoprotein OS=Mus musculus OX=10090 GN=Mag PE=1 SV=3	Mag	4	1	1	1	69.3			234739		1.15206e+06				231091					552825			356198
Q9DCS9	NADH dehydrogenase [ubiquinone] 1 beta subcomplex subunit 10 OS=Mus musculus OX=10090 GN=Ndufb10 PE=1 SV=3	Ndufb10	65	10	198	10	21	6.64958e+07	5.283e+07	3.87327e+07	6.20614e+07	8.83884e+07	4.20712e+07	3.95388e+07	2.88544e+07	5.6135e+07	5.01607e+07	3.40258e+07	5.31073e+07	3.85596e+07	3.44379e+07	2.83354e+07	3.94783e+07	5.08126e+07	3.84738e+07
Q9CQE7	Endoplasmic reticulum-Golgi intermediate compartment protein 3 OS=Mus musculus OX=10090 GN=Ergic3 PE=1 SV=1	Ergic3	2	1	2	1	43.2
Q8BWY3	Eukaryotic peptide chain release factor subunit 1 OS=Mus musculus OX=10090 GN=Etf1 PE=1 SV=4	Etf1	20	8	93	8	49	3.83871e+06	4.4697e+06	7.65628e+06	6.46606e+06	5.0071e+06	5.54826e+06	6.37377e+06	4.09549e+06	4.94014e+06	3.59686e+06	4.84408e+06	3.66573e+06	5.02038e+06	6.03154e+06	5.80023e+06	4.61952e+06	6.49657e+06	4.103e+06
Q91WK2	Eukaryotic translation initiation factor 3 subunit H OS=Mus musculus OX=10090 GN=Eif3h PE=1 SV=1	Eif3h	20	6	66	6	39.8	3.51644e+06	3.27013e+06	2.3414e+06	3.00163e+06	4.29134e+06	2.30452e+06	2.61519e+06	3.14677e+06	4.97065e+06	3.00954e+06	3.79988e+06	3.17303e+06	1.96973e+06	3.34624e+06	2.82154e+06	3.13759e+06	3.64076e+06	3.91108e+06
P01899	H-2 class I histocompatibility antigen, D-B alpha chain OS=Mus musculus OX=10090 GN=H2-D1 PE=1 SV=2	H2-D1	22	6	37	3	40.8	2.97538e+06	1.91021e+06	431085	225690	1.81299e+06	62144.5	1.04562e+06	2.56447e+06	5.78782e+06	1.88084e+06	2.33642e+06	1.61514e+06	1.21654e+06	2.06224e+06	9.46602e+06	1.95253e+06	2.11003e+06	2.62549e+06
Q61646	Haptoglobin OS=Mus musculus OX=10090 GN=Hp PE=1 SV=1	Hp	8	3	15	3	38.7	8.40027e+06	6.76904e+06	4.604e+06	8.93085e+06	5.72798e+06	5.84365e+06	7.92801e+06	5.97438e+06	6.9105e+06	1.08709e+07	5.34607e+06	1.08832e+07	7.15838e+06	8.96555e+06	4.94275e+06	6.22998e+06	9.13607e+06	6.00882e+06
P63017	Heat shock cognate 71 kDa protein OS=Mus musculus OX=10090 GN=Hspa8 PE=1 SV=1	Hspa8	47	29	768	22	70.8	5.52029e+08	5.94779e+08	5.25734e+08	6.23764e+08	7.75566e+08	4.93724e+08	5.54731e+08	6.22031e+08	7.47414e+08	6.16968e+08	5.9382e+08	5.72898e+08	5.79442e+08	6.44004e+08	7.53379e+08	5.52076e+08	6.22771e+08	5.3474e+08
Q60960	Importin subunit alpha-5 OS=Mus musculus OX=10090 GN=Kpna1 PE=1 SV=2	Kpna1	10	4	33	2	60.1	2.39516e+06	2.64686e+06	1.79146e+06	1.41559e+06	1.7307e+06	1.80779e+06	1.59879e+06	1.90668e+06	1.22348e+06	2.03054e+06	2.11398e+06	1.24487e+06	2.54799e+06	2.49361e+06	2.3201e+06	2.39698e+06	2.23541e+06	2.38969e+06
Q9DBB5	Eukaryotic translation initiation factor 4E type 3 OS=Mus musculus OX=10090 GN=Eif4e3 PE=1 SV=1	Eif4e3	20	2	27	2	22.8	1.89743e+06	2.99491e+06	3.9753e+06	3.11675e+06	3.85948e+06	3.83264e+06	1.99127e+06	3.12512e+06	1.66549e+06	4.03965e+06	3.23472e+06	2.58435e+06	2.83985e+06	2.97698e+06	2.23685e+06	1.92302e+06	2.21313e+06	3.21265e+06
Q61500	Integral membrane protein 2A OS=Mus musculus OX=10090 GN=Itm2a PE=2 SV=2	Itm2a	3	1	4	1	29.7	250878			459802	337828		50646.7	258132	298673	176083	188835	203064		110329	93039.3	119139	280807	243180
Q9CPU0	Lactoylglutathione lyase OS=Mus musculus OX=10090 GN=Glo1 PE=1 SV=3	Glo1	70	10	166	10	20.8	1.31221e+08	1.39336e+08	1.3584e+08	1.52719e+08	1.49508e+08	9.18374e+07	1.06922e+08	1.02951e+08	9.75903e+07	8.69418e+07	9.75565e+07	1.08762e+08	1.12568e+08	1.12196e+08	9.72846e+07	8.87813e+07	1.2975e+08	1.28973e+08
Q8BVA5	Lipid droplet-associated hydrolase OS=Mus musculus OX=10090 GN=Ldah PE=1 SV=1	Ldah	5	1	3	1	37.3				167899				50034.6	186309						332242
Q8BFW7	Lipoma-preferred partner homolog OS=Mus musculus OX=10090 GN=Lpp PE=1 SV=1	Lpp	16	5	16	5	65.8	391585	308198	451665	468136	27497.5	162353	809496	1.08974e+06	851252	252242	641052	165686	345846	832476	1.40291e+06	888907	865392	282658
Q8BRK9	Alpha-mannosidase 2x OS=Mus musculus OX=10090 GN=Man2a2 PE=1 SV=2	Man2a2	18	11	78	11	130.6	4.2625e+07	5.68359e+07	5.4906e+07	5.05858e+07	5.08214e+07	3.22905e+07	3.89071e+07	3.76987e+07	4.02701e+07	4.53764e+07	4.01171e+07	2.98208e+07	3.37776e+07	4.70599e+07	4.33599e+07	4.76848e+07	3.49379e+07	5.90253e+07
O08605	MAP kinase-interacting serine/threonine-protein kinase 1 OS=Mus musculus OX=10090 GN=Mknk1 PE=1 SV=2	Mknk1	4	1	16	1	47.9	232267	449995	285738		311333	437691	495892	424934	468256	484625	257769	384160	356167	228028	218041	282657	462485	452468
Q91X83	S-adenosylmethionine synthase isoform type-1 OS=Mus musculus OX=10090 GN=Mat1a PE=1 SV=1	Mat1a	13	4	18	3	43.5	127119		1.49319e+06	1.02589e+06		1.27824e+06	3.14925e+06	1.06699e+06	731362			698048		364998	793897	1.08086e+06		1.44545e+06
Q8VEL0	Motile sperm domain-containing protein 1 OS=Mus musculus OX=10090 GN=Mospd1 PE=1 SV=1	Mospd1	23	3	23	3	24.1		405011	259720	427889		123023	352205	55242.5	399380		84620	114760	496795	834285	452210	128993	462098	572172
P02762	Major urinary protein 6 OS=Mus musculus OX=10090 GN=Mup6 PE=1 SV=2	Mup6	38	5	45	1	20.6	87947.1	95918.7		88217.7	312956	563172	666089	178360	200383	580170	299573	301970	180142	129568	587787	376826	127827	120226
Q8CI43	Myosin light chain 6B OS=Mus musculus OX=10090 GN=Myl6b PE=1 SV=1	Myl6b	74	13	131	12	22.7	1.38055e+07	5.94685e+06	1.40383e+06	7.3727e+07	4.32374e+07	7.52881e+06	1.75303e+07	2.54277e+07	1.55663e+08	6.0618e+07	6.48734e+06	1.34795e+07	7.7061e+06	3.16225e+06	2.64234e+06	4.52173e+07	1.61288e+07	1.09169e+07
Q91YT0	NADH dehydrogenase [ubiquinone] flavoprotein 1, mitochondrial OS=Mus musculus OX=10090 GN=Ndufv1 PE=1 SV=1	Ndufv1	56	20	363	20	50.8	2.81338e+08	1.481e+08	1.46963e+08	1.62783e+08	2.4222e+08	1.7733e+08	1.90556e+08	1.89432e+08	2.96981e+08	2.00268e+08	1.41487e+08	2.67472e+08	2.03086e+08	1.79339e+08	1.5838e+08	2.13129e+08	2.27013e+08	1.69628e+08
Q9DC69	NADH dehydrogenase [ubiquinone] 1 alpha subcomplex subunit 9, mitochondrial OS=Mus musculus OX=10090 GN=Ndufa9 PE=1 SV=2	Ndufa9	42	12	252	12	42.5	1.1322e+08	7.39622e+07	5.2362e+07	9.73491e+07	1.32536e+08	6.30627e+07	9.01199e+07	5.81903e+07	1.16582e+08	9.43501e+07	5.95483e+07	1.18424e+08	8.22274e+07	7.23216e+07	6.83015e+07	8.07824e+07	1.07665e+08	7.06105e+07
Q99LC3	NADH dehydrogenase [ubiquinone] 1 alpha subcomplex subunit 10, mitochondrial OS=Mus musculus OX=10090 GN=Ndufa10 PE=1 SV=1	Ndufa10	52	17	281	17	40.6	1.08386e+08	7.12188e+07	6.60016e+07	8.54002e+07	1.16916e+08	6.97238e+07	67422123	5.62126e+07	1.01936e+08	9.3557e+07	5.52479e+07	1.24011e+08	9.49595e+07	6.77512e+07	7.19308e+07	7.43254e+07	8.25896e+07	6.79205e+07
Q9CRD0	OCIA domain-containing protein 1 OS=Mus musculus OX=10090 GN=Ociad1 PE=1 SV=1	Ociad1	29	5	49	5	27.6	4.28983e+06	3.99172e+06	2.71996e+06	5.20106e+06	6.4761e+06	3.49792e+06	3.86607e+06	3.46208e+06	5.97334e+06	4.35015e+06	3.03704e+06	3.0676e+06	3.2368e+06	3.10473e+06	5.7536e+06	4.94101e+06	5.09641e+06	4.03108e+06
A2A8Z1	Oxysterol-binding protein-related protein 9 OS=Mus musculus OX=10090 GN=Osbpl9 PE=1 SV=1	Osbpl9	5	3	26	3	83.1	1.17417e+06	934110	1.04273e+06	1.60811e+06	1.42872e+06	1.25316e+06	1.04085e+06	1.50377e+06	1.60413e+06	1.77793e+06	1.59823e+06	965796	960235	1.01318e+06	1.73548e+06	1.44719e+06	1.4e+06	1.82388e+06
P70699	Lysosomal alpha-glucosidase OS=Mus musculus OX=10090 GN=Gaa PE=1 SV=2	Gaa	7	5	56	5	106.2	3.38095e+06	2.3673e+06	2.87453e+06	2.71661e+06	2.88596e+06	1.7301e+06	1.47092e+06	1.9857e+06	2.10263e+06	2.34901e+06	1.10578e+06	1.63533e+06	1.44833e+06	2.49363e+06	1.59218e+06	1.62686e+06	3.55386e+06	1.72371e+06
Q9ERV1	Probable E3 ubiquitin-protein ligase makorin-2 OS=Mus musculus OX=10090 GN=Mkrn2 PE=1 SV=2	Mkrn2	8	3	12	3	46.6	272435	482432	310450	429853	109527	113478	438347	490682	575324	179372	381420	353250	348041	293004	470558	186417	506559	166434
Q9CXJ4	Mitochondrial potassium channel ATP-binding subunit OS=Mus musculus OX=10090 GN=Abcb8 PE=1 SV=1	Abcb8	21	12	65	12	78	7.77978e+06	4.77531e+06	4.22592e+06	4.86358e+06	7.51168e+06	5.79444e+06	3.59034e+06	3.9697e+06	1.00478e+07	6.96468e+06	4.53622e+06	7.68212e+06	4.77992e+06	4.93412e+06	3.95062e+06	5.01e+06	6.34351e+06	6.17676e+06
Q3THS6	S-adenosylmethionine synthase isoform type-2 OS=Mus musculus OX=10090 GN=Mat2a PE=1 SV=2	Mat2a	26	9	102	8	43.7	9.93304e+06	8.02301e+06	1.13546e+07	1.14005e+07	1.36387e+07	9.54642e+06	1.08657e+07	1.28745e+07	1.19829e+07	1.42161e+07	1.25863e+07	8.2605e+06	9.66313e+06	1.30642e+07	1.1681e+07	1.22145e+07	8.01173e+06	1.12882e+07
Q9DD20	Methyltransferase-like protein 7B OS=Mus musculus OX=10090 GN=Mettl7b PE=1 SV=2	Mettl7b	11	2	7	2	28	132747	143116	187583		482101	105231	618400	107973	349922	146553	78990.4	279280	148616	93996	218839	91627.3		143627
Q9D023	Mitochondrial pyruvate carrier 2 OS=Mus musculus OX=10090 GN=Mpc2 PE=1 SV=1	Mpc2	46	5	63	5	14.3	2.49632e+07	2.30942e+07	1.53765e+07	2.73693e+07	6.69773e+07	2.79444e+07	25261261	2.12308e+07	4.04442e+07	2.64351e+07	1.86e+07	3.9922e+07	2.75892e+07	2.1516e+07	2.20972e+07	2.35396e+07	2.22485e+07	2.09544e+07
Q9Z2C5	Myotubularin OS=Mus musculus OX=10090 GN=Mtm1 PE=1 SV=2	Mtm1	24	10	72	10	69.5	3.54137e+06	3.71052e+06	3.44352e+06	2.93176e+06	3.06092e+06	3.28632e+06	2.18543e+06	2.78531e+06	3.70736e+06	2.4629e+06	2.73279e+06	3.65566e+06	2.67402e+06	2.51633e+06	1.56581e+06	2.34381e+06	3.23241e+06	2.82291e+06
P70402	Myosin-binding protein H OS=Mus musculus OX=10090 GN=Mybph PE=2 SV=2	Mybph	59	18	512	18	52.6	2.13166e+08	3.6364e+08	5.33017e+08	3.19556e+08	1.90715e+08	3.69194e+08	3.14203e+08	3.8415e+08	1.67161e+08	2.30377e+08	4.15122e+08	2.03579e+08	3.0432e+08	3.82761e+08	2.92228e+08	3.30832e+08	3.20785e+08	3.42576e+08
Q8VCR8	Myosin light chain kinase 2, skeletal/cardiac muscle OS=Mus musculus OX=10090 GN=Mylk2 PE=1 SV=2	Mylk2	48	20	359	19	65.9	8.77473e+07	8.38195e+07	6.87564e+07	6.77298e+07	4.98436e+07	7.55485e+07	5.72097e+07	6.35485e+07	6.31244e+07	6.44862e+07	6.74438e+07	9.06737e+07	6.25495e+07	6.58042e+07	4.78159e+07	5.23516e+07	7.27733e+07	8.00342e+07
O08692	Neutrophilic granule protein OS=Mus musculus OX=10090 GN=Ngp PE=1 SV=1	Ngp	24	3	17	3	19.3	953699	738479	426611		3.48218e+06	930744	1.20494e+06	1.32516e+06	1.23713e+06	2.05208e+06	708275	1.25187e+06	2.28245e+06	1.80921e+06	4.91628e+06	879393	1.24422e+06	2.00877e+06
Q61937	Nucleophosmin OS=Mus musculus OX=10090 GN=Npm1 PE=1 SV=1	Npm1	53	9	95	9	32.5	1.44952e+07	1.35174e+07	1.10309e+07	1.85278e+07	2.24705e+07	1.24375e+07	1.54524e+07	1.44099e+07	1.83971e+07	1.4557e+07	1.34416e+07	1.43986e+07	1.26114e+07	1.33613e+07	2.74987e+07	1.1894e+07	1.20201e+07	1.44758e+07
Q62425	Cytochrome c oxidase subunit NDUFA4 OS=Mus musculus OX=10090 GN=Ndufa4 PE=1 SV=2	Ndufa4	78	7	136	7	9.3	3.58939e+08	2.15326e+08	1.79352e+08	2.35219e+08	3.8383e+08	1.8894e+08	1.81171e+08	1.57795e+08	3.25522e+08	2.36824e+08	1.4208e+08	3.16654e+08	2.24063e+08	1.8424e+08	2.04397e+08	2.10656e+08	2.22698e+08	1.76956e+08
Q8R050	Eukaryotic peptide chain release factor GTP-binding subunit ERF3A OS=Mus musculus OX=10090 GN=Gspt1 PE=1 SV=2	Gspt1	26	13	97	13	68.6	6.97443e+06	1.28281e+07	1.16314e+07	1.24694e+07	1.5756e+07	1.08273e+07	1.27261e+07	1.575e+07	9.93078e+06	1.79125e+07	1.34632e+07	1.12609e+07	1.30161e+07	1.32161e+07	1.18181e+07	1.15103e+07	8.3476e+06	8.27542e+06
O35166	Golgi SNAP receptor complex member 2 OS=Mus musculus OX=10090 GN=Gosr2 PE=1 SV=2	Gosr2	11	1	7	1	24.7	248499	123809	118877	535330	677433	394997	507878	557514	448368	138283	125213		226216	134681	177391		240349	420922
Q8BH86	D-glutamate cyclase, mitochondrial OS=Mus musculus OX=10090 GN=Dglucy PE=1 SV=1	Dglucy	6	3	20	3	66.3	1.16331e+07	1.05616e+07	7.04197e+06	1.06298e+07	9.67526e+06	1.40988e+07	1.26466e+07	1.43587e+07	1.3078e+07	1.58112e+07	1.06176e+07	1.90155e+07	2.04617e+07	1.6294e+07	1.03901e+07	1.35278e+07	1.1591e+07	8.42331e+06
Q3UGR5	Haloacid dehalogenase-like hydrolase domain-containing protein 2 OS=Mus musculus OX=10090 GN=Hdhd2 PE=1 SV=2	Hdhd2	42	6	88	6	28.7	1.66834e+07	1.83074e+07	2.02007e+07	1.81771e+07	2.77252e+07	1.49671e+07	1.51644e+07	1.15466e+07	1.96145e+07	1.76442e+07	1.69365e+07	1.49864e+07	1.52678e+07	1.53558e+07	1.53843e+07	1.57754e+07	1.55597e+07	1.36025e+07
Q9JK37	Myozenin-1 OS=Mus musculus OX=10090 GN=Myoz1 PE=1 SV=1	Myoz1	84	16	1133	16	31.4	1.14834e+09	1.12354e+09	1.033e+09	9.58103e+08	9.3651e+08	1.16893e+09	1.02347e+09	1.09502e+09	8.39607e+08	1.04268e+09	1.15892e+09	1.0187e+09	1.17428e+09	1.09958e+09	1.1035e+09	1.07025e+09	1.15559e+09	1.05906e+09
Q9CQ19	Myosin regulatory light polypeptide 9 OS=Mus musculus OX=10090 GN=Myl9 PE=1 SV=3	Myl9	56	7	113	3	19.8	2.02101e+07	1.22338e+07	1.06239e+07	1.07013e+07	1.40905e+07	9.2684e+06	8.90749e+06	1.18179e+07	1.46438e+07	9.94732e+06	8.88603e+06	1.0866e+07	1.01139e+07	1.21391e+07	2.75808e+07	1.37252e+07	1.31935e+07	1.23636e+07
Q9CZ44	NSFL1 cofactor p47 OS=Mus musculus OX=10090 GN=Nsfl1c PE=1 SV=1	Nsfl1c	35	11	146	11	40.7	1.75856e+07	1.28144e+07	1.6197e+07	1.92832e+07	2.07542e+07	1.68712e+07	1.3904e+07	1.93344e+07	2.22983e+07	1.95711e+07	1.69941e+07	2.28257e+07	1.49254e+07	1.92208e+07	2.01544e+07	1.25143e+07	1.97221e+07	1.79724e+07
Q99PR8	Heat shock protein beta-2 OS=Mus musculus OX=10090 GN=Hspb2 PE=1 SV=2	Hspb2	57	6	120	6	20.4	4.25538e+07	3.60473e+07	3.64105e+07	4.06008e+07	3.25566e+07	2.23506e+07	3.49186e+07	3.72151e+07	3.20959e+07	3.38665e+07	3.04065e+07	3.05561e+07	3.10228e+07	4.33103e+07	3.78787e+07	3.93887e+07	3.94561e+07	3.75844e+07
Q9CQZ1	Heat shock factor-binding protein 1 OS=Mus musculus OX=10090 GN=Hsbp1 PE=1 SV=1	Hsbp1	47	2	5	2	8.6	1.44096e+06	1.16538e+06		1.8926e+06		1.98435e+06	1.4333e+06	5.86651e+06	8.22351e+06	4.56059e+06	3.75444e+06	3.65471e+06	3.08861e+06					2.73171e+06
Q8VDM6	Heterogeneous nuclear ribonucleoprotein U-like protein 1 OS=Mus musculus OX=10090 GN=Hnrnpul1 PE=1 SV=1	Hnrnpul1	6	4	27	3	95.9	8.77923e+06	6.25235e+06	4.96284e+06	7.47489e+06	7.801e+06	1.0354e+07	9.72388e+06	5.84671e+06	1.17909e+07	9.84058e+06	6.11386e+06	1.31992e+07	1.23741e+07	8.83177e+06	9.12884e+06	8.16747e+06	9.9181e+06	6.33051e+06
Q05D44	Eukaryotic translation initiation factor 5B OS=Mus musculus OX=10090 GN=Eif5b PE=1 SV=2	Eif5b	12	10	85	10	137.5	2.67233e+06	2.82925e+06	3.50334e+06	4.32177e+06	6.08887e+06	2.78294e+06	3.4183e+06	3.63909e+06	3.34113e+06	4.10028e+06	3.70716e+06	3.78634e+06	3.88112e+06	3.44184e+06	4.11787e+06	4.29446e+06	3.50381e+06	4.07389e+06
Q6NZJ6	Eukaryotic translation initiation factor 4 gamma 1 OS=Mus musculus OX=10090 GN=Eif4g1 PE=1 SV=1	Eif4g1	18	26	293	23	176	3.61053e+07	4.19876e+07	3.78302e+07	3.69225e+07	3.93627e+07	3.70797e+07	3.21972e+07	3.73894e+07	3.57445e+07	3.46067e+07	3.83439e+07	3.40359e+07	3.00572e+07	3.78024e+07	3.39886e+07	3.17998e+07	3.86084e+07	4.33232e+07
O88844	Isocitrate dehydrogenase [NADP] cytoplasmic OS=Mus musculus OX=10090 GN=Idh1 PE=1 SV=2	Idh1	56	22	247	21	46.6	3.74648e+07	4.02147e+07	2.7581e+07	2.53104e+07	4.38718e+07	1.76955e+07	2.73404e+07	2.5048e+07	3.95063e+07	2.58074e+07	2.68584e+07	2.93702e+07	2.09413e+07	2.10937e+07	3.94755e+07	2.07068e+07	2.72684e+07	3.00275e+07
Q9D0M1	Phosphoribosyl pyrophosphate synthase-associated protein 1 OS=Mus musculus OX=10090 GN=Prpsap1 PE=1 SV=1	Prpsap1	8	2	25	2	39.4	522601	512934	662362	505932	710457	620477	588214	724962	671717	595469	743705	582429	571996	743962	901873	862168	687595	822526
Q9CPT4	Myeloid-derived growth factor OS=Mus musculus OX=10090 GN=Mydgf PE=1 SV=1	Mydgf	21	3	28	3	18	2.04103e+06	1.54784e+06	1.69473e+06	1.46617e+06	2.32539e+06	1.7178e+06	1.22196e+06	1.65029e+06	2.97972e+06	2.14568e+06	1.7232e+06	2.02075e+06	1.28846e+06	747617	3.13644e+06	1.68511e+06	1.31877e+06	1.46185e+06
Q6PHQ8	N-alpha-acetyltransferase 35, NatC auxiliary subunit OS=Mus musculus OX=10090 GN=Naa35 PE=1 SV=1	Naa35	2	1	7	1	83.3	301115	477265	356246	375313	371298	326323	241888	263309	182769	271780	261424	228663	308794	350379	248052	182771	223948	228425
Q91X72	Hemopexin OS=Mus musculus OX=10090 GN=Hpx PE=1 SV=2	Hpx	43	18	339	18	51.3	1.23518e+08	1.16603e+08	1.43418e+08	1.03501e+08	1.65188e+08	7.92242e+07	1.21254e+08	1.34644e+08	2.12785e+08	1.42509e+08	1.28331e+08	9.30714e+07	7.14256e+07	1.10669e+08	2.93171e+08	1.2859e+08	1.25021e+08	1.1001e+08
Q9DCL8	Protein phosphatase inhibitor 2 OS=Mus musculus OX=10090 GN=Ppp1r2 PE=1 SV=3	Ppp1r2	27	3	27	3	23.1	2.63356e+06	2.31881e+06	2.51712e+06	2.69705e+06	2.14581e+06	998548	1.98346e+06	2.29738e+06	3.13089e+06	1.97818e+06	1.99682e+06	1.5593e+06	1.89467e+06	1.91196e+06	2.55108e+06	1.80154e+06	1.92592e+06	1.204e+06
Q8BKC5	Importin-5 OS=Mus musculus OX=10090 GN=Ipo5 PE=1 SV=3	Ipo5	28	22	202	22	123.5	1.32958e+07	1.62303e+07	1.48097e+07	2.23072e+07	2.18477e+07	1.19777e+07	1.17503e+07	1.53726e+07	1.48163e+07	1.58397e+07	1.76278e+07	1.62106e+07	1.47307e+07	1.35615e+07	1.09159e+07	1.10371e+07	1.2366e+07	1.66912e+07
O89112	Glutathione S-transferase LANCL1 OS=Mus musculus OX=10090 GN=Lancl1 PE=1 SV=1	Lancl1	10	3	38	3	45.3	2.49707e+06	3.50323e+06	2.37458e+06	5.9205e+06	4.32283e+06	2.68587e+06	2.63367e+06	3.39342e+06	3.9455e+06	2.67927e+06	2.30032e+06	4.07527e+06	3.56251e+06	4.604e+06	3.19966e+06	3.23269e+06	4.10544e+06	4.04022e+06
Q02111	Protein kinase C theta type OS=Mus musculus OX=10090 GN=Prkcq PE=1 SV=1	Prkcq	18	11	73	10	81.5	1.2442e+07	1.23079e+07	1.22268e+07	1.28566e+07	1.2172e+07	8.17272e+06	8.37061e+06	7.93239e+06	1.02853e+07	6.31157e+06	6.8234e+06	7.55439e+06	8.70075e+06	9.7061e+06	9.72848e+06	9.42669e+06	8.85332e+06	1.126e+07
P16045	Galectin-1 OS=Mus musculus OX=10090 GN=Lgals1 PE=1 SV=3	Lgals1	54	6	232	6	14.9	1.34211e+08	1.34993e+08	1.1649e+08	9.87789e+07	1.26007e+08	1.07793e+08	1.10337e+08	1.18052e+08	1.33517e+08	1.13367e+08	1.36669e+08	9.51955e+07	1.19624e+08	1.26244e+08	1.72833e+08	1.34636e+08	1.17712e+08	1.26504e+08
P37040	NADPH--cytochrome P450 reductase OS=Mus musculus OX=10090 GN=Por PE=1 SV=2	Por	13	8	53	8	77	1.40821e+07	1.31427e+07	1.3258e+07	1.47127e+07	1.50335e+07	1.32923e+07	1.27917e+07	1.50334e+07	1.53044e+07	1.37506e+07	1.43213e+07	1.28316e+07	1.53906e+07	1.3198e+07	1.82609e+07	1.34163e+07	1.60657e+07	1.53766e+07
Q9CQ91	NADH dehydrogenase [ubiquinone] 1 alpha subcomplex subunit 3 OS=Mus musculus OX=10090 GN=Ndufa3 PE=1 SV=1	Ndufa3	50	4	110	4	9.3	6.38774e+07	4.91173e+07	3.65548e+07	5.36903e+07	1.33342e+08	5.27323e+07	5.10223e+07	3.03043e+07	7.83293e+07	7.43427e+07	5.94075e+07	4.77543e+07	3.7333e+07	3.15035e+07	3.42062e+07	4.08064e+07	5.04502e+07	4.51849e+07
Q7TPW1	Nexilin OS=Mus musculus OX=10090 GN=Nexn PE=1 SV=3	Nexn	27	16	145	15	72.1	2.16749e+07	3.04148e+07	3.04993e+07	2.51482e+07	3.59277e+07	3.77132e+07	4.06273e+07	5.25861e+07	4.66034e+07	3.47709e+07	4.75655e+07	3.37298e+07	5.92318e+07	5.00882e+07	6.00061e+07	7.01128e+07	4.82932e+07	6.26936e+07
Q60716	Prolyl 4-hydroxylase subunit alpha-2 OS=Mus musculus OX=10090 GN=P4ha2 PE=1 SV=1	P4ha2	7	2	11	2	61	372473	472483	165473	359858	688685	162704	198686	286847	768589	303398	563642	337483	163639	325928	505984	344228	342198	270000
Q9QYB5	Gamma-adducin OS=Mus musculus OX=10090 GN=Add3 PE=1 SV=2	Add3	7	3	19	3	78.7	1.61039e+06	1.51227e+06	877241	1.47721e+06	1.4258e+06	1.19898e+06	1.71108e+06	1.38777e+06	1.74129e+06	1.51608e+06	816690	1.88487e+06	450574	2.17566e+06	3.1752e+06	1.4783e+06	857202	1.33827e+06
Q505B7	Protein archease OS=Mus musculus OX=10090 GN=Zbtb8os PE=1 SV=2	Zbtb8os	10	2	8	2	19.7	488179		463982		565426	742770	738707		657219		582809		589516	633002	612238
Q64133	Amine oxidase [flavin-containing] A OS=Mus musculus OX=10090 GN=Maoa PE=1 SV=3	Maoa	14	5	46	4	59.6	1.54085e+06	977627	1.28661e+06	1.30567e+06	1.95647e+06	1.04644e+06	1.09256e+06	1.13683e+06	1.37195e+06	1.15886e+06	1.16881e+06	1.17955e+06	992880	1.19626e+06	1.47321e+06	1.03453e+06	1.19938e+06	1.36207e+06
Q9EPE9	Manganese-transporting ATPase 13A1 OS=Mus musculus OX=10090 GN=Atp13a1 PE=1 SV=2	Atp13a1	5	4	35	4	132.3	1.80766e+06	577521	548244	620234	1.29751e+06	849047	410760	792829	1.40505e+06	742695	763872	835765	946953	1.06775e+06	1.04261e+06	1.39374e+06	957684	1.23452e+06
Q6PIE5	Sodium/potassium-transporting ATPase subunit alpha-2 OS=Mus musculus OX=10090 GN=Atp1a2 PE=1 SV=1	Atp1a2	44	40	879	30	112.1	2.08521e+08	1.34954e+08	1.09215e+08	1.43265e+08	1.98018e+08	1.31476e+08	1.48779e+08	1.54234e+08	2.94325e+08	1.80171e+08	1.24143e+08	2.25108e+08	1.61669e+08	1.65283e+08	1.92571e+08	1.87948e+08	1.77751e+08	1.6415e+08
P09055	Integrin beta-1 OS=Mus musculus OX=10090 GN=Itgb1 PE=1 SV=1	Itgb1	18	12	175	12	88.2	1.28824e+07	1.0786e+07	7.13002e+06	9.87922e+06	1.61565e+07	7.56106e+06	9.15334e+06	9.60022e+06	1.22909e+07	1.31968e+07	7.83025e+06	1.00653e+07	8.40305e+06	9.89303e+06	1.19649e+07	1.00859e+07	1.10989e+07	1.0796e+07
Q9ET78	Junctophilin-2 OS=Mus musculus OX=10090 GN=Jph2 PE=1 SV=2	Jph2	28	15	226	14	74.6	2.83346e+07	3.71236e+07	3.40635e+07	3.5622e+07	2.39185e+07	3.6222e+07	3.4544e+07	2.73606e+07	3.60124e+07	2.43308e+07	3.50392e+07	2.51965e+07	3.18712e+07	2.74321e+07	2.25239e+07	2.245e+07	3.04244e+07	2.68115e+07
O88792	Junctional adhesion molecule A OS=Mus musculus OX=10090 GN=F11r PE=1 SV=2	F11r	7	1	5	1	32.4															257497
Q8BWA5	Kelch-like protein 31 OS=Mus musculus OX=10090 GN=Klhl31 PE=1 SV=1	Klhl31	33	15	171	15	70.1	3.43191e+07	2.10675e+07	2.8547e+07	2.40065e+07	1.50723e+07	1.8251e+07	1.94958e+07	3.73104e+07	2.54685e+07	2.77582e+07	2.48044e+07	1.47859e+07	1.97763e+07	2.72323e+07	1.95178e+07	2.26201e+07	1.79835e+07	1.71625e+07
Q8BK63	Casein kinase I isoform alpha OS=Mus musculus OX=10090 GN=Csnk1a1 PE=1 SV=2	Csnk1a1	12	4	30	4	38.9	2.58975e+06	1.90112e+06	1.42559e+06	978197	1.5769e+06	1.50227e+06	1.99634e+06	2.72096e+06	2.59479e+06	2.66462e+06	1.92269e+06	1.83031e+06	2.50798e+06	2.72675e+06	3.45581e+06	2.84817e+06	2.63976e+06	3.17278e+06
P16125	L-lactate dehydrogenase B chain OS=Mus musculus OX=10090 GN=Ldhb PE=1 SV=2	Ldhb	49	16	366	15	36.5	5.99833e+07	7.38075e+07	2.14785e+07	1.5101e+08	1.97494e+08	7.70408e+07	1.05525e+08	4.98774e+07	1.53567e+08	1.57806e+08	2.00166e+07	5.62255e+07	9.55066e+07	4.59048e+07	3.34711e+07	1.03024e+08	1.20857e+08	6.92001e+07
O54974	Galectin-7 OS=Mus musculus OX=10090 GN=Lgals7 PE=2 SV=3	Lgals7	12	1	1	1	15.2	458342			317416	59333		290709	38861.4	302439		221658		316321	273839	90524	195326
Q8VEE1	LIM and cysteine-rich domains protein 1 OS=Mus musculus OX=10090 GN=Lmcd1 PE=1 SV=1	Lmcd1	49	15	154	15	41	5.5295e+07	2.491e+07	1.54211e+07	4.09183e+07	6.40147e+07	1.76432e+07	2.72216e+07	2.76886e+07	7.03388e+07	4.24399e+07	1.93422e+07	5.30578e+07	2.82392e+07	2.54206e+07	2.95667e+07	3.78563e+07	3.69527e+07	2.69681e+07
P63005	Platelet-activating factor acetylhydrolase IB subunit beta OS=Mus musculus OX=10090 GN=Pafah1b1 PE=1 SV=2	Pafah1b1	39	12	162	11	46.6	8.82158e+06	8.36291e+06	7.16657e+06	6.71629e+06	1.19288e+07	8.26135e+06	1.01679e+07	9.2568e+06	9.38701e+06	1.03471e+07	8.01403e+06	1.13637e+07	1.12074e+07	1.14647e+07	1.06661e+07	9.94007e+06	1.13078e+07	1.08024e+07
Q9DB27	Malignant T-cell-amplified sequence 1 OS=Mus musculus OX=10090 GN=Mcts1 PE=1 SV=1	Mcts1	57	7	109	7	20.5	2.94906e+07	2.62568e+07	2.54448e+07	2.21414e+07	2.41597e+07	2.72589e+07	2.66206e+07	1.7675e+07	2.20876e+07	1.64293e+07	2.62084e+07	1.9105e+07	1.61721e+07	1.73266e+07	2.5429e+07	2.10792e+07	2.93866e+07	2.33979e+07
P22892	AP-1 complex subunit gamma-1 OS=Mus musculus OX=10090 GN=Ap1g1 PE=1 SV=3	Ap1g1	5	5	20	5	91.3	1.1115e+06	1.28234e+06	333973	2.48989e+06	1.91832e+06	346271	719189	1.2304e+06	2.4054e+06	1.43974e+06	1.2792e+06	1.1871e+06	1.05821e+06	958505	1.8843e+06	1.0158e+06	2.12324e+06	2.33244e+06
P61205	ADP-ribosylation factor 3 OS=Mus musculus OX=10090 GN=Arf3 PE=2 SV=2	Arf3	41	6	114	2	20.6	7.81612e+06	5.85623e+06	5.01404e+06	6.08198e+06	6.26286e+06	6.06752e+06	6.4421e+06	6.62426e+06	9.85059e+06	6.02641e+06	7.62503e+06	5.76634e+06	8.36976e+06	1.07631e+07	1.49217e+07	1.00708e+07	6.57603e+06	8.85914e+06
Q9WV06	Ankyrin repeat domain-containing protein 2 OS=Mus musculus OX=10090 GN=Ankrd2 PE=1 SV=3	Ankrd2	60	16	210	16	36.7	2.76054e+07	2.90282e+07	1.12702e+07	6.07612e+07	8.0213e+07	1.78738e+07	2.92393e+07	3.15676e+07	1.04262e+08	6.38723e+07	2.1941e+07	2.51298e+07	3.01663e+07	1.28635e+07	2.25347e+07	3.75416e+07	4.19875e+07	2.38141e+07
Q9CVB6	Actin-related protein 2/3 complex subunit 2 OS=Mus musculus OX=10090 GN=Arpc2 PE=1 SV=3	Arpc2	21	7	86	7	34.3	5.90945e+06	4.77039e+06	3.13222e+06	4.20119e+06	5.18836e+06	4.04766e+06	5.02669e+06	6.66656e+06	7.16316e+06	5.58753e+06	5.91212e+06	6.17582e+06	5.82823e+06	6.68066e+06	1.17029e+07	6.52525e+06	5.59685e+06	8.14338e+06
P16858	Glyceraldehyde-3-phosphate dehydrogenase OS=Mus musculus OX=10090 GN=Gapdh PE=1 SV=2	Gapdh	77	29	3420	29	35.8	6.57904e+09	8.02404e+09	8.79864e+09	7.82331e+09	7.47679e+09	7.17906e+09	7.19493e+09	6.943e+09	8.00711e+09	7.18117e+09	7.62021e+09	6.68347e+09	7.1372e+09	6.06242e+09	6.06483e+09	6.28048e+09	5.9959e+09	6.36154e+09
P47856	Glutamine--fructose-6-phosphate aminotransferase [isomerizing] 1 OS=Mus musculus OX=10090 GN=Gfpt1 PE=1 SV=3	Gfpt1	2	1	5	1	78.5	279116	361897	286997	685516	272364	133077	392514	227669	453065	313329	462201	283848	124211	190370	297207	299263	206759	566189
Q60631	Growth factor receptor-bound protein 2 OS=Mus musculus OX=10090 GN=Grb2 PE=1 SV=1	Grb2	26	5	88	5	25.2	4.52853e+06	4.97187e+06	5.45751e+06	5.17399e+06	6.94473e+06	4.44497e+06	4.57265e+06	4.82703e+06	7.05016e+06	4.42328e+06	5.43872e+06	5.20059e+06	5.25642e+06	5.94199e+06	6.73505e+06	5.96111e+06	5.61398e+06	5.88155e+06
Q9DC07	LIM zinc-binding domain-containing Nebulette OS=Mus musculus OX=10090 GN=Nebl PE=1 SV=1	Nebl	6	2	24	1	31.1	1.25851e+07	1.37851e+07	1.23712e+07	1.26157e+07	1.2933e+07	1.10571e+07	9835518	1.00333e+07	9.5421e+06	1.04399e+07	1.12818e+07	8.99299e+06	1.1127e+07	9.23141e+06	8.16607e+06	1.24253e+07	1.07915e+07	1.02078e+07
Q9CQY5	Magnesium transporter protein 1 OS=Mus musculus OX=10090 GN=Magt1 PE=1 SV=1	Magt1	8	3	31	3	37.9	3.34951e+06	1.98474e+06	2.00606e+06	2.14516e+06	2.27737e+06	2.1932e+06	2.09365e+06	2.68773e+06	3.93921e+06	2.1288e+06	2.9381e+06	3.45653e+06	2.61572e+06	1.95206e+06	3.76066e+06	3.0013e+06	2.99424e+06	3.26122e+06
Q9JMH9	Unconventional myosin-XVIIIa OS=Mus musculus OX=10090 GN=Myo18a PE=1 SV=2	Myo18a	16	24	201	24	232.6	1.17547e+07	1.98128e+07	1.65623e+07	2.32326e+07	2.6508e+07	1.61493e+07	1.21784e+07	1.40938e+07	1.66249e+07	1.81245e+07	1.97688e+07	1.49294e+07	1.60691e+07	1.54701e+07	1.64956e+07	1.58562e+07	2.27183e+07	1.74246e+07
Q9DB73	NADH-cytochrome b5 reductase 1 OS=Mus musculus OX=10090 GN=Cyb5r1 PE=1 SV=1	Cyb5r1	36	10	129	10	34.1	1.92712e+07	1.56463e+07	1.21424e+07	1.23067e+07	1.71188e+07	1.04117e+07	1.25839e+07	1.73975e+07	2.25616e+07	1.67748e+07	1.16491e+07	1.73045e+07	1.67191e+07	1.68266e+07	1.30953e+07	1.85918e+07	1.61378e+07	1.92458e+07
Q5SUA5	Unconventional myosin-Ig OS=Mus musculus OX=10090 GN=Myo1g PE=1 SV=1	Myo1g	6	3	4	3	117.2	2.09746e+07	1.63785e+07	1.03898e+07	1.98881e+07	2.43305e+07	1.20345e+07	11670618	8.8169e+06	1.1874e+07	1.14378e+07	7.221e+06	1.42436e+07	1.13291e+07	7.57422e+06	6.37019e+06	1.15633e+07	1.21811e+07	8.40968e+06
Q8VDD5	Myosin-9 OS=Mus musculus OX=10090 GN=Myh9 PE=1 SV=4	Myh9	39	73	852	54	226.2	1.18669e+08	1.04117e+08	8.34595e+07	1.09857e+08	1.17138e+08	8.23066e+07	1.00404e+08	1.12977e+08	1.23429e+08	1.09396e+08	9.60905e+07	8.92698e+07	1.0118e+08	1.17617e+08	2.03436e+08	1.12443e+08	1.00708e+08	1.31237e+08
P60670	Nuclear protein localization protein 4 homolog OS=Mus musculus OX=10090 GN=Nploc4 PE=1 SV=3	Nploc4	13	6	43	6	68	4.96487e+06	4.91267e+06	4.08971e+06	5.45076e+06	2.52033e+06	6.12203e+06	8.12689e+06	4.92397e+06	4.97076e+06	6.31119e+06	8.06448e+06	6.21307e+06	7.21148e+06	6.36557e+06	7.26352e+06	6.96491e+06	4.96733e+06	5.54364e+06
Q9D6Z1	Nucleolar protein 56 OS=Mus musculus OX=10090 GN=Nop56 PE=1 SV=2	Nop56	5	3	7	3	64.4	1.49179e+06	1.41893e+06	924702	1.45607e+06	789979	300040	849684	906587	1.71755e+06	1.24393e+06	1.22294e+06	1.24715e+06	1.53531e+06	663889	2.15323e+06	1.71025e+06	1.00089e+06	1.31819e+06
P52503	NADH dehydrogenase [ubiquinone] iron-sulfur protein 6, mitochondrial OS=Mus musculus OX=10090 GN=Ndufs6 PE=1 SV=2	Ndufs6	63	7	102	7	13	1.13287e+08	7.75362e+07	6.21067e+07	8.85981e+07	1.52749e+08	7.61084e+07	7.48751e+07	7.31059e+07	1.37097e+08	1.00394e+08	6.039e+07	9.8124e+07	8.20289e+07	6.91099e+07	5.68854e+07	7.57835e+07	9.22064e+07	6.04543e+07
Q99LY9	NADH dehydrogenase [ubiquinone] iron-sulfur protein 5 OS=Mus musculus OX=10090 GN=Ndufs5 PE=1 SV=3	Ndufs5	56	7	119	7	12.6	4.11661e+07	2.85252e+07	2.33871e+07	1.91304e+07	3.01356e+07	2.80357e+07	2.75597e+07	1.9837e+07	2.76031e+07	2.92941e+07	2.15518e+07	3.13654e+07	2.67128e+07	2.12318e+07	1.84796e+07	2.52189e+07	3.60071e+07	2.54738e+07
P0DN34	NADH dehydrogenase [ubiquinone] 1 beta subcomplex subunit 1 OS=Mus musculus OX=10090 GN=Ndufb1 PE=1 SV=1	Ndufb1	54	2	24	2	7	7.65358e+06	3.90256e+06	2.46317e+06	3.57009e+06	4.88845e+06	1.18973e+06	3.13277e+06	2.2234e+06	6.28897e+06	3.11731e+06	3.29006e+06	6.47159e+06	3.79716e+06	4.78673e+06	4.78741e+06	5.34257e+06	4.33275e+06	3.74434e+06
Q61553	Fascin OS=Mus musculus OX=10090 GN=Fscn1 PE=1 SV=4	Fscn1	13	6	35	6	54.5	1.70552e+06	270766	623296	1.72682e+06	4.8269e+06	460552	1.81731e+06	1.43643e+06	1.87332e+06	2.30824e+06		3.28704e+06	1.29817e+06	1.60067e+06	5.96281e+06	537907	1.05424e+06	1.34848e+06
Q7TMY8	E3 ubiquitin-protein ligase HUWE1 OS=Mus musculus OX=10090 GN=Huwe1 PE=1 SV=5	Huwe1	4	13	65	13	482.3	8.77454e+06	6.98659e+06	6.34287e+06	6.1322e+06	6.04838e+06	6.48539e+06	4.27769e+06	5.76228e+06	6.03745e+06	6.62821e+06	6.22292e+06	2.24779e+06	5.04731e+06	2.66502e+06	4.81672e+06	3.46986e+06	5.33952e+06	6.26604e+06
P11499	Heat shock protein HSP 90-beta OS=Mus musculus OX=10090 GN=Hsp90ab1 PE=1 SV=3	Hsp90ab1	52	38	890	25	83.2	4.0892e+08	3.66984e+08	4.1595e+08	3.97581e+08	6.15282e+08	4.15774e+08	4.46565e+08	4.28533e+08	6.70128e+08	5.57668e+08	5.1057e+08	5.66231e+08	6.27105e+08	9.83329e+08	7.76169e+08	8.05734e+08	4.38301e+08	4.73896e+08
P26262	Plasma kallikrein OS=Mus musculus OX=10090 GN=Klkb1 PE=1 SV=2	Klkb1	2	1	4	1	71.3	5.19959e+06	5.96452e+06	6.88538e+06	7.27855e+06	7.89015e+06	6.42748e+06	5852211	6.36355e+06	5.94099e+06	5.67255e+06	5.01766e+06	6.31955e+06	6.75214e+06	6.18778e+06	5.76873e+06	5.92821e+06	5.14674e+06	5.26817e+06
O35900	U6 snRNA-associated Sm-like protein LSm2 OS=Mus musculus OX=10090 GN=Lsm2 PE=1 SV=1	Lsm2	28	2	3	2	10.8	60945.7		95420.5		98559.1		43275.1		180730						248993	69811.1	45744.7	100834
Q3THG9	Alanyl-tRNA editing protein Aarsd1 OS=Mus musculus OX=10090 GN=Aarsd1 PE=1 SV=2	Aarsd1	12	4	36	4	44.9	2.29268e+06	1.92256e+06	1.13811e+06	2.29806e+06	2.0414e+06	480253	1.64862e+06	1.8708e+06	1.77411e+06	2.33417e+06	645374	1.28953e+06	854068	804850	1.96933e+06	1.33655e+06	1.1362e+06	774459
Q9QYC0	Alpha-adducin OS=Mus musculus OX=10090 GN=Add1 PE=1 SV=2	Add1	10	6	35	6	80.6	1.11132e+08	1.72098e+08	1.32203e+08	1.39785e+08	1.311e+08	1.36634e+08	1.18322e+08	1.14971e+08	7.67269e+07	1.08952e+08	1.35013e+08	8.92126e+07	1.16807e+08	1.04529e+08	7.85492e+07	9.84417e+07	1.13341e+08	1.20487e+08
[truncated: 1,885 more rows]

## Sheet: Proteome of liver
Protein accession	Protein description	Gene name	Coverage [%]	Peptides	PSMs	Unique Peptides	MW [kDa]	Intensity CL1	Intensity CL2	Intensity CL3	Intensity CL4	Intensity CL5	Intensity CL6	Intensity CL7	Intensity CL8	Intensity CL9	Intensity FL1	Intensity FL2	Intensity FL3	Intensity FL4	Intensity FL5	Intensity FL6	Intensity FL7	Intensity FL8	Intensity FL9
[truncated: 5,304 more rows]

[truncated: 4 more sheets: Lactate levels of plasma, Glycogen levels of liver, PEP levles of liver, PC levels of liver]
